# Supplementary material
Source: publisher figshare collection journal article supplement (https://gsapubs.figshare.com/articles/dataset/_/16620391)
Supplement: Supplementary file 1 [file 3]

Archive with 3 entries (3 files):
- 061-05_Stop 5 - Sacramento Pass.pdf
- 061-05_Stops 1-4 - Sulfidic Caves.pdf
- 061-05_Stops 6-11 - Great Basin Caves.pdf
