# Supplementary material
Source: publisher figshare collection journal article supplement (https://gsapubs.figshare.com/articles/dataset/_/16620391)
Supplement: Supplementary file 1 [file 3 › 061-05_Stop 5 - Sacramento Pass.pdf]

# Sacramento Pass, Nevada

- Introduction 0900 PDT
- Stop 1 – Cueva de Villa Luz 0905 PDT
- Stop 2 – Frasassi Caves 0930 PDT
- Stop 3 – Carlsbad Cavern 0955 PDT
- Stop 4 – Lechuguilla Cave 1015 PDT
- **Stop 5 – Sacramento Pass 1035 PDT**  
**Don Sweetkind, Doug Powell**
- Break/Intermission 1055 PDT
- Stop 6 – Lehman Caves 1105 PDT
- Break/Intermission 1245 PDT
- Stop 7 – Burial Cave 1255 PDT
- Stop 8 – Crystal Ball Cave 1305 PDT
- Stop 9 - Pescio Cave 1315 PDT
- Stop 10 – Discovery Cave 1325 PDT
- Stop 11 – Old Mans Cave 1335 PDT
- Summary and questions 1345 PDT

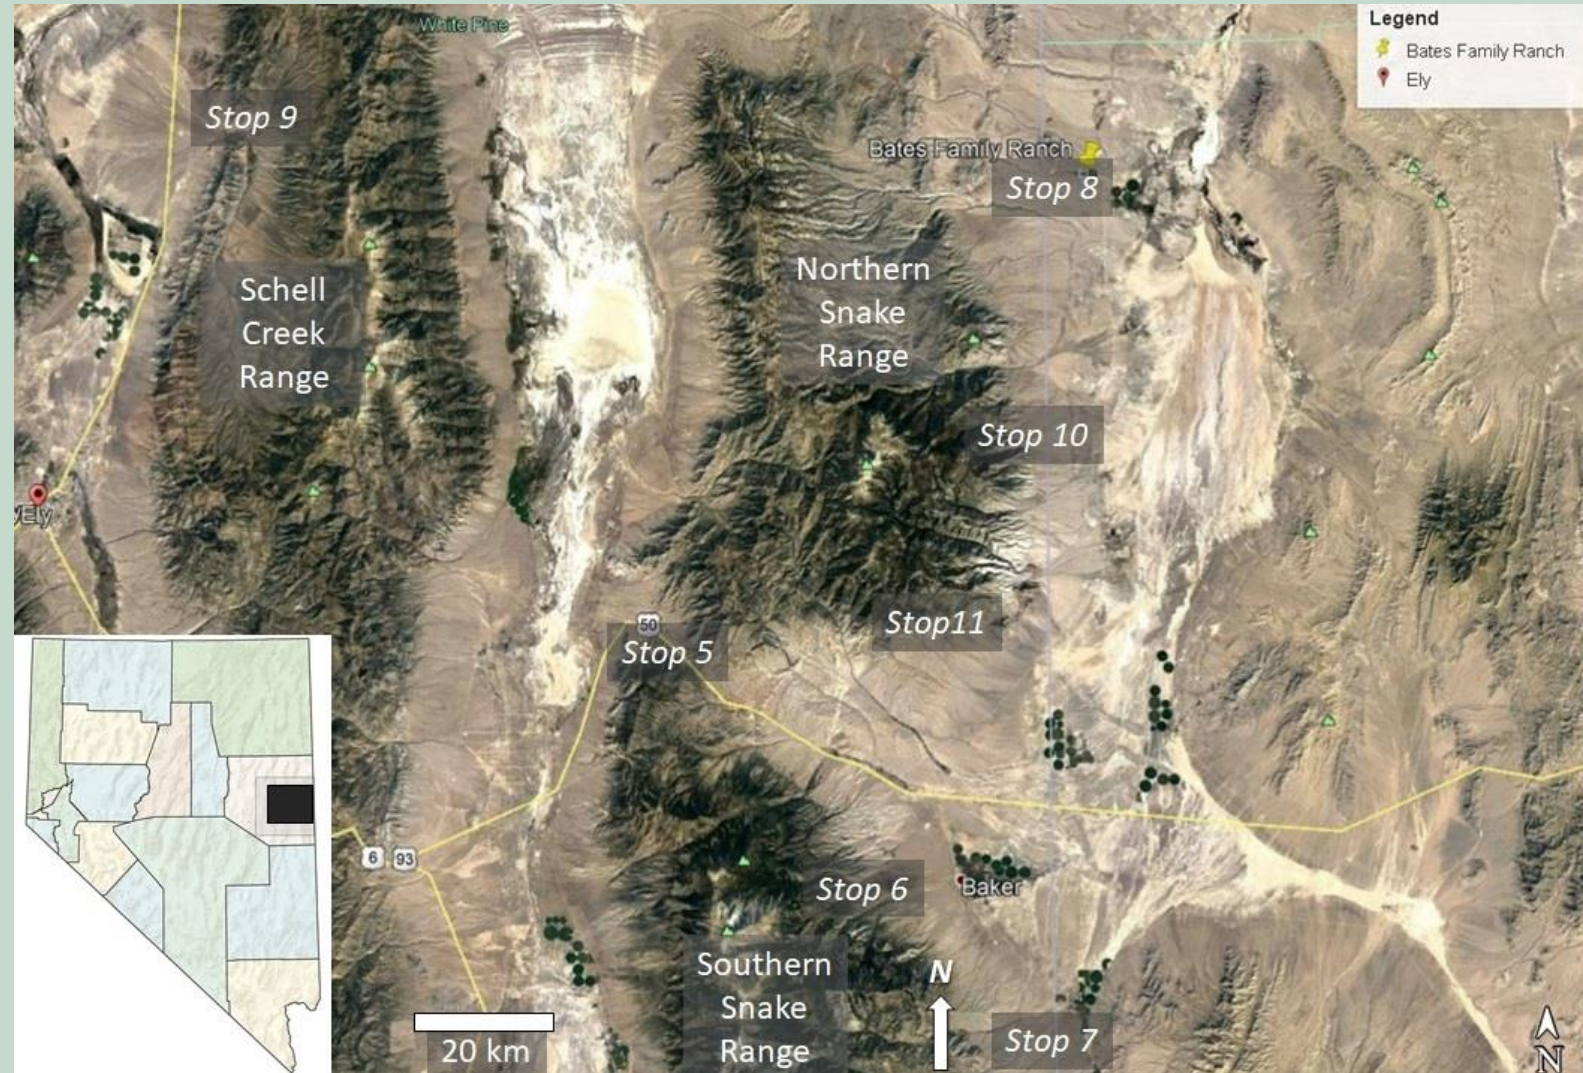

# Eastern Great Basin carbonate-rock province

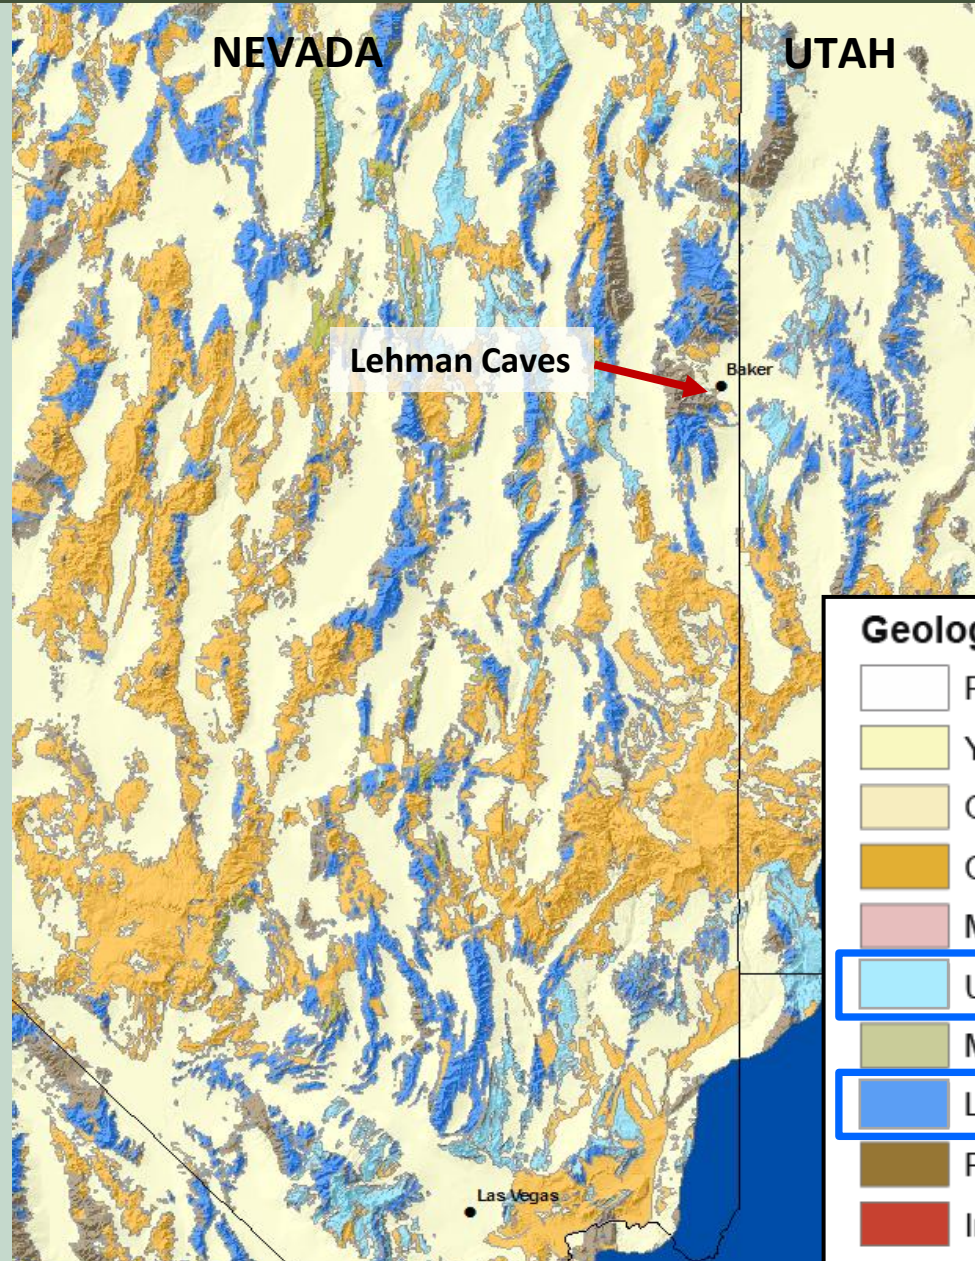

## Geologic Unit

- Playa deposits
- Younger alluvium and valley fill
- Older alluvium and alluvial fans
- Cenozoic volcanic rocks, undivided
- Miocene sedimentary rocks
- Upper Paleozoic carbonate rocks
- Mississippian siliciclastic rocks
- Lower Paleozoic carbonate rocks
- Proterozoic and Lower Cambrian siliciclastic rocks
- Intrusive rocks, undivided

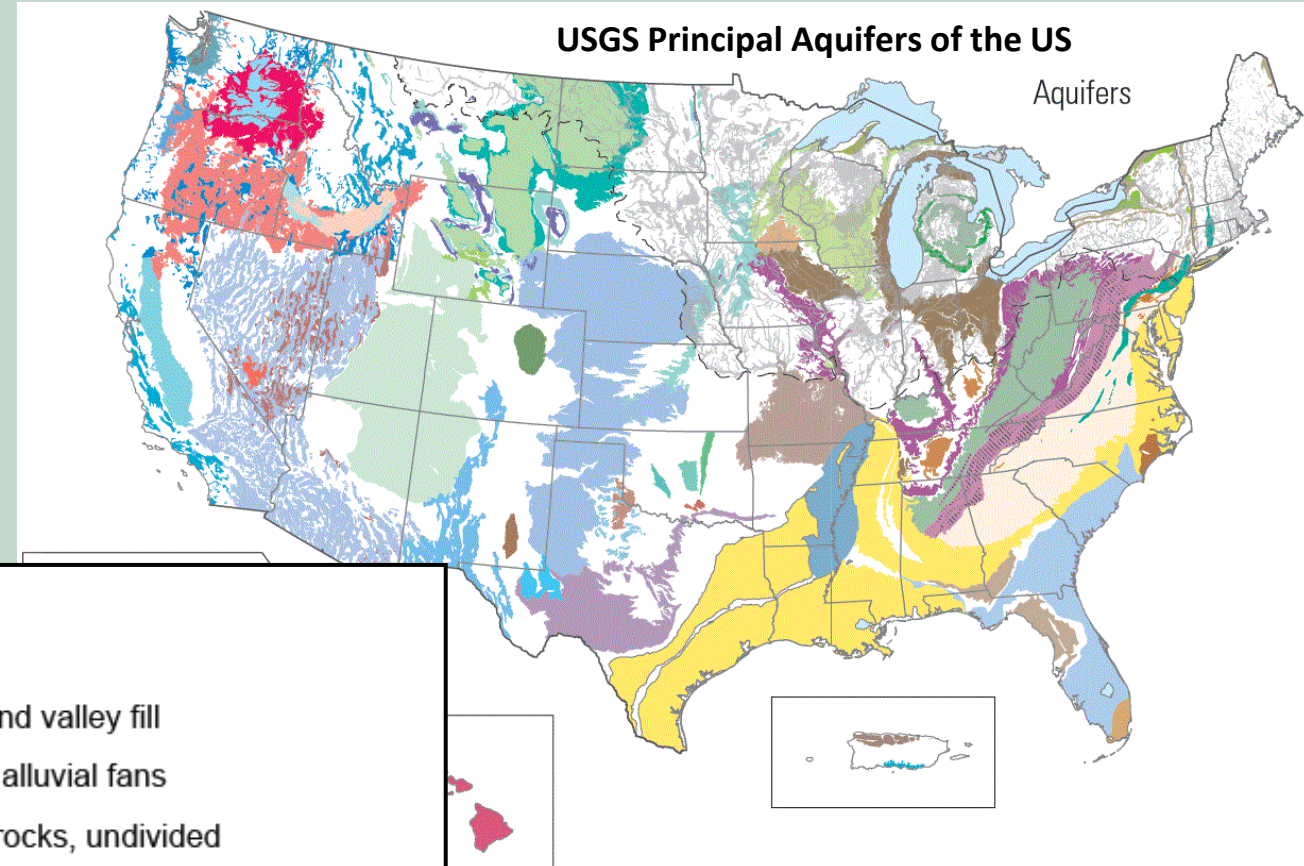

*Hypogenic Caves of the Great Basin: Sacramento Pass*

# Eastern Great Basin carbonate-rock province

- In eastern Great Basin, Paleozoic carbonate rocks are many thousands of feet thick
- Lehman Caves area exposes the lowest Cambrian part of the carbonate-rock section

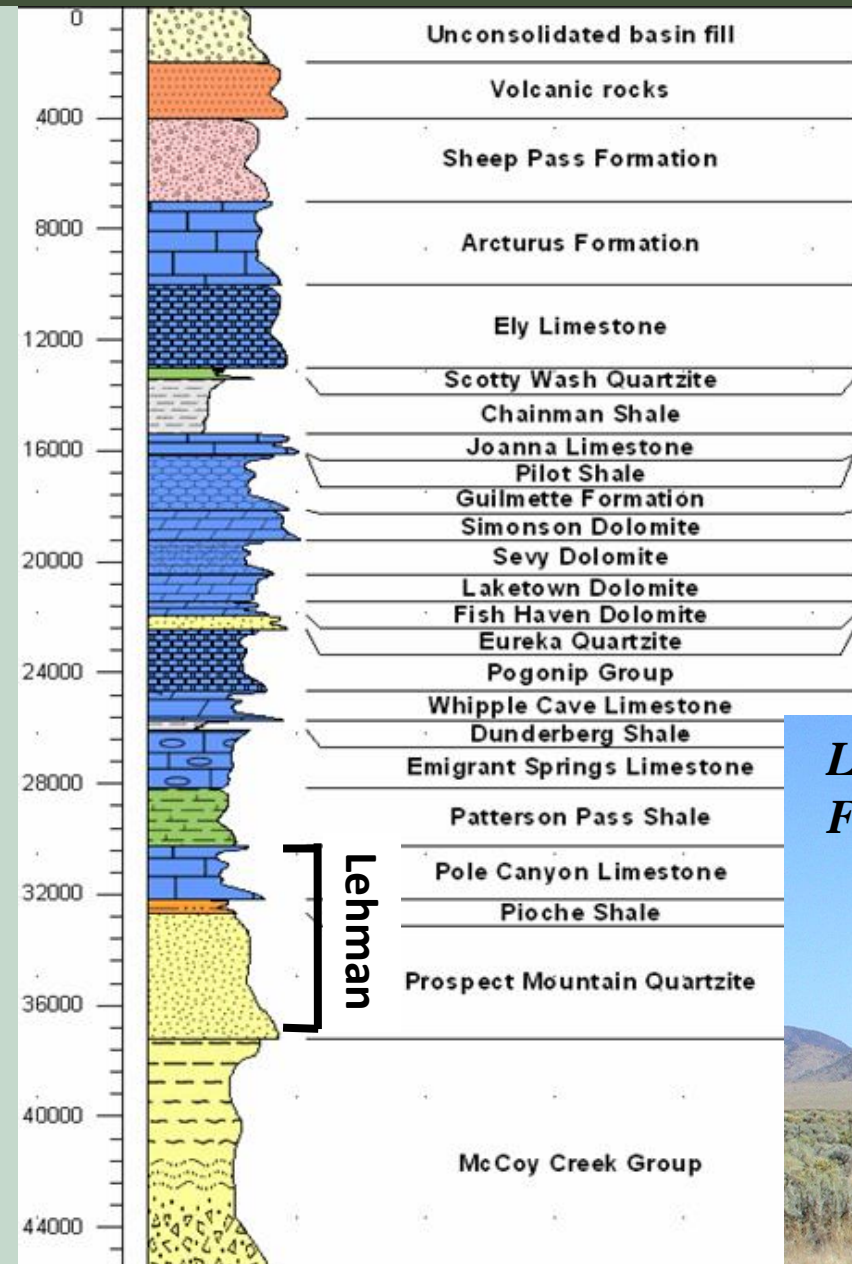

*Looking E to southern Egan Range  
From Sunnyside*

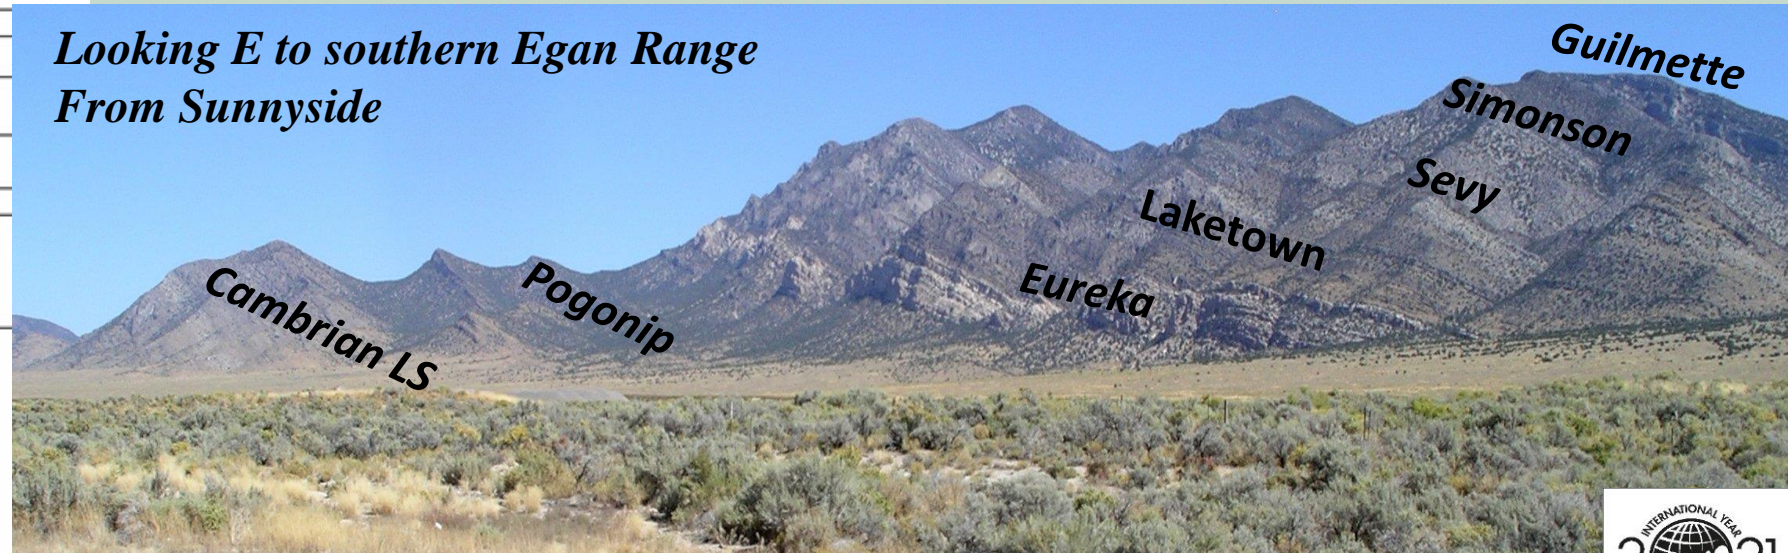

*Hypogenic Caves of the Great Basin: Sacramento Pass*

**“Many of the desert springs in southern Nevada derive their flow from distant recharge areas rather than from nearby rainfall.”**

**W.C. Mendenhall (1909) Some desert watering places in southeastern California and southwestern Nevada U.S. Geological Survey Water-Supply Paper 224**

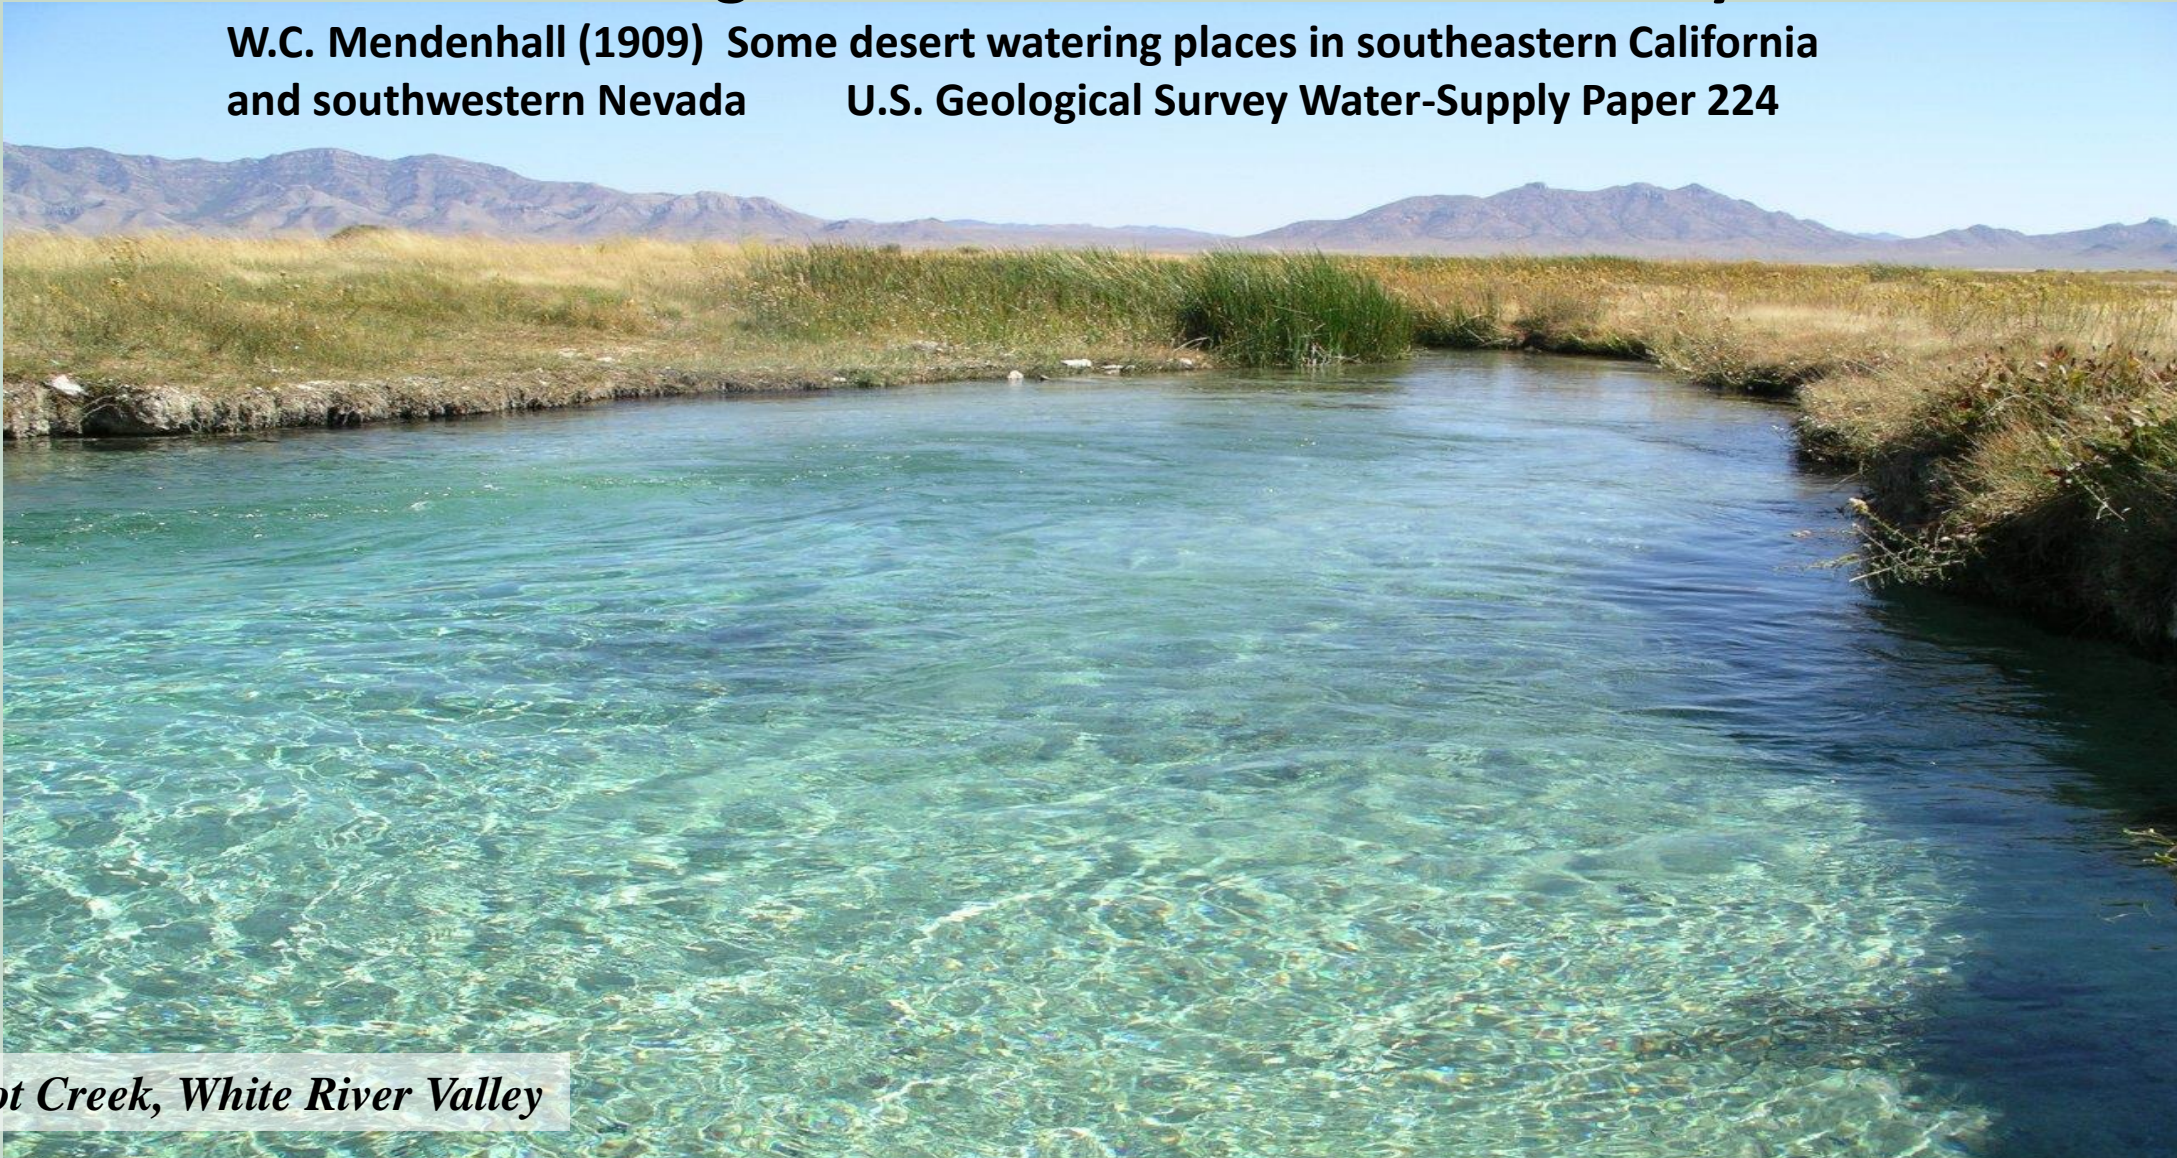

*Hot Creek, White River Valley*

# Evidence for permeability in Paleozoic carbonate-rock aquifers

## Potentiometric surface

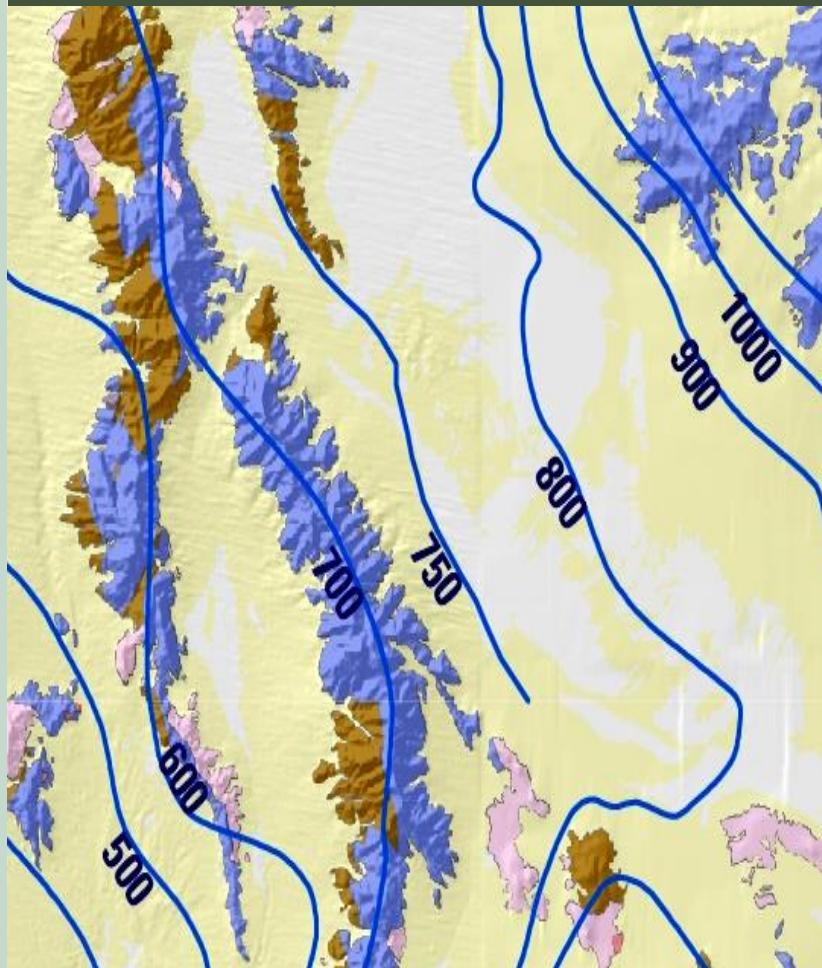

Harrill, 1965, Ground-water storage depletion in Pahrump Valley, Nevada-California, 1962-75  
U.S. Geological Survey Water-Supply Paper 2279

## Pump tests

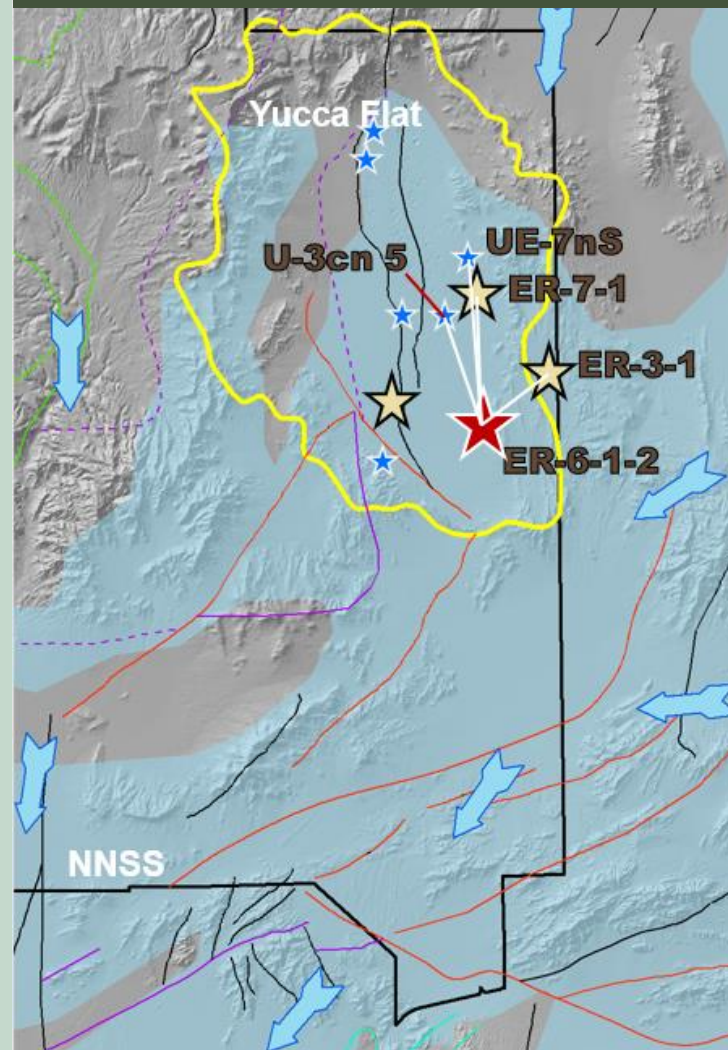

Contouring of regional potentiometric surface

Evidence from springs

- Elevated temperature
- Large volume, constant flow
- Chemistry
- Isotopes

Pump tests

### Pumping at ER-6-1-2 at NNSS

Large, immediate, and widespread response  
Responses noted miles away within hours of pumping  
Two-feet of drawdown measured 8 miles away

# Regional flow systems in Paleozoic carbonate-rock aquifers

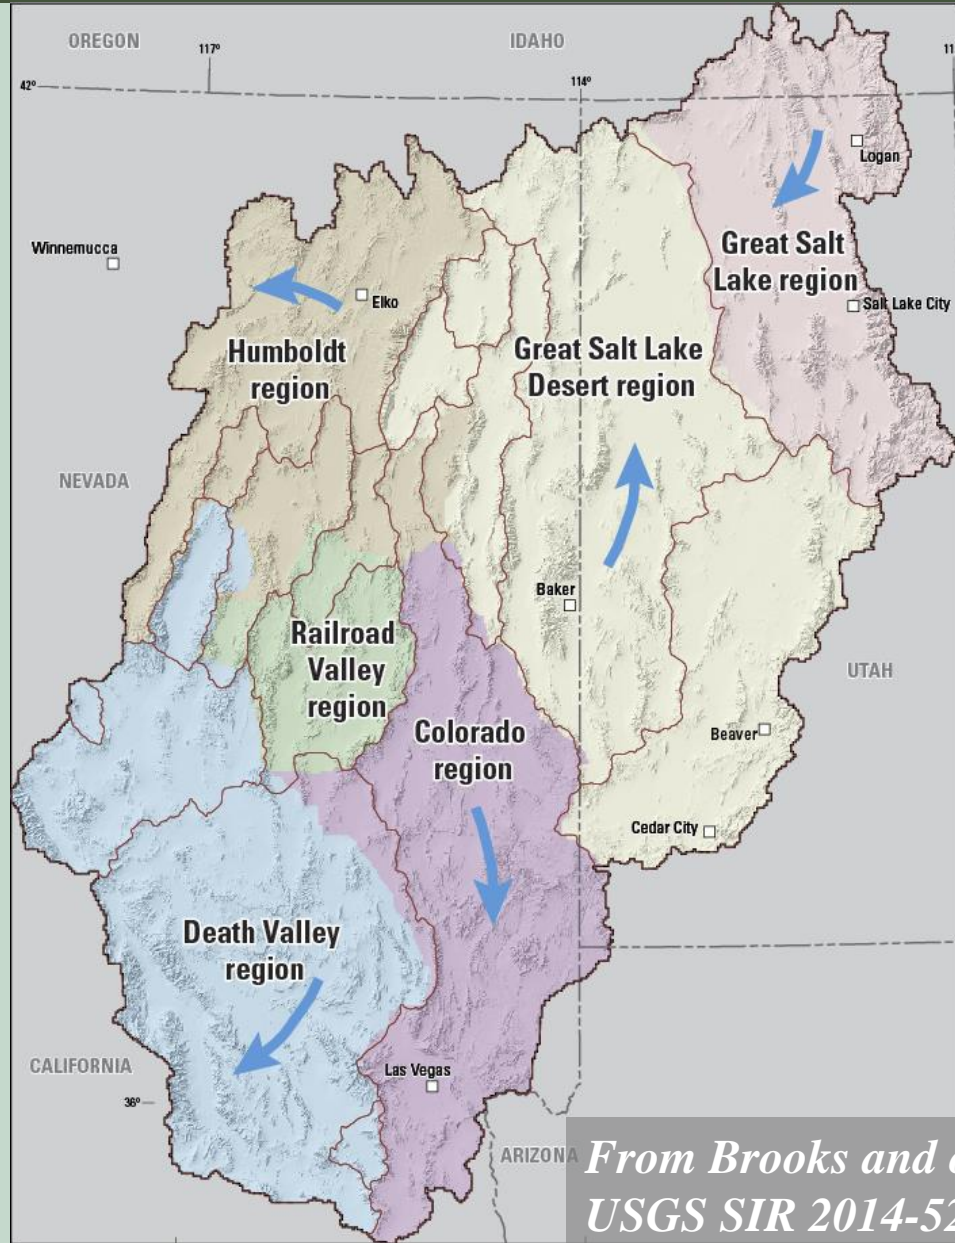

- Carbonate-rock province supports deep, regional flow
- Integrates recharge from numerous ranges and basins
- Broad regions of subsurface flow that connect recharge and discharge areas
- Variable degree of connection between regions

*From Brooks and others 2014  
USGS SIR 2014-5213*

# Type of permeability in Paleozoic carbonate-rock aquifers

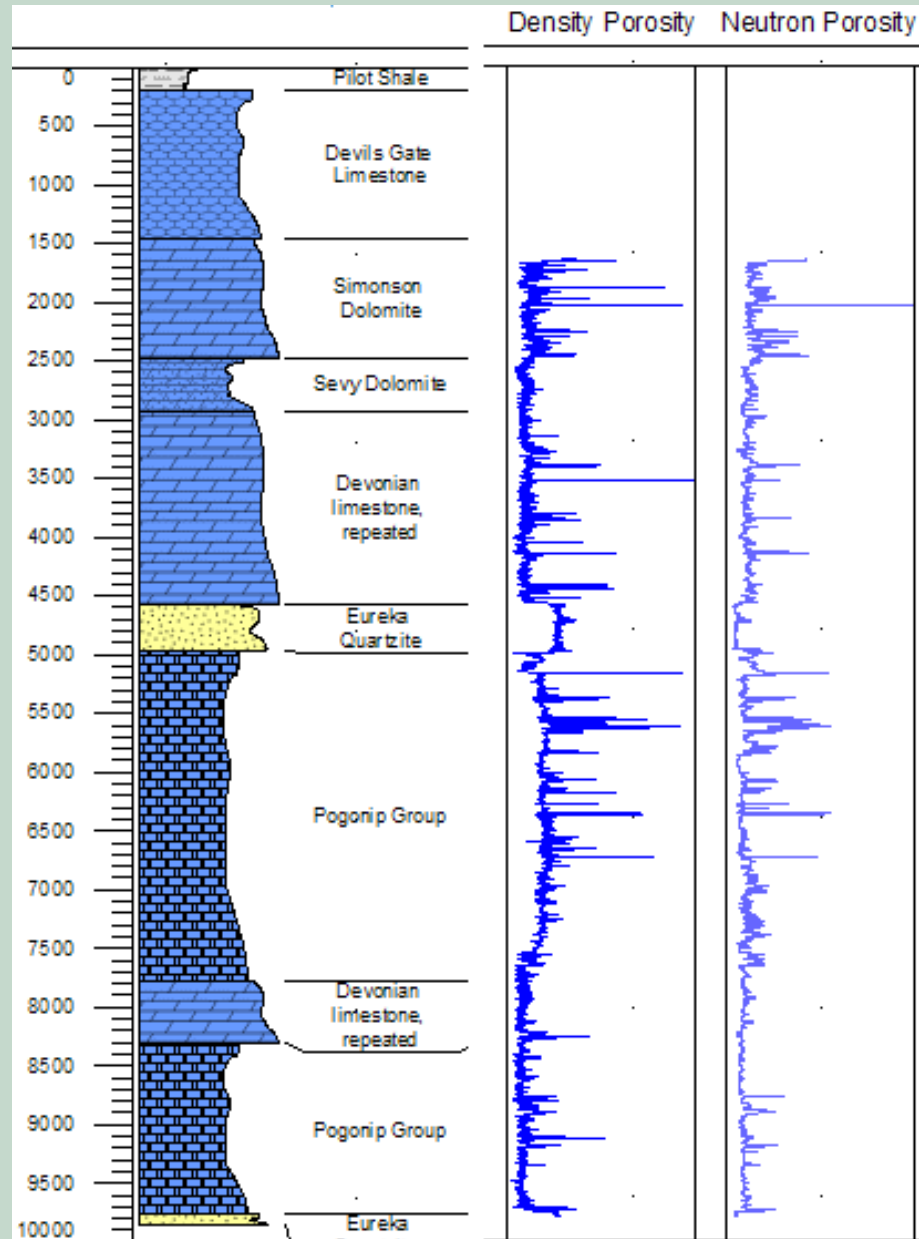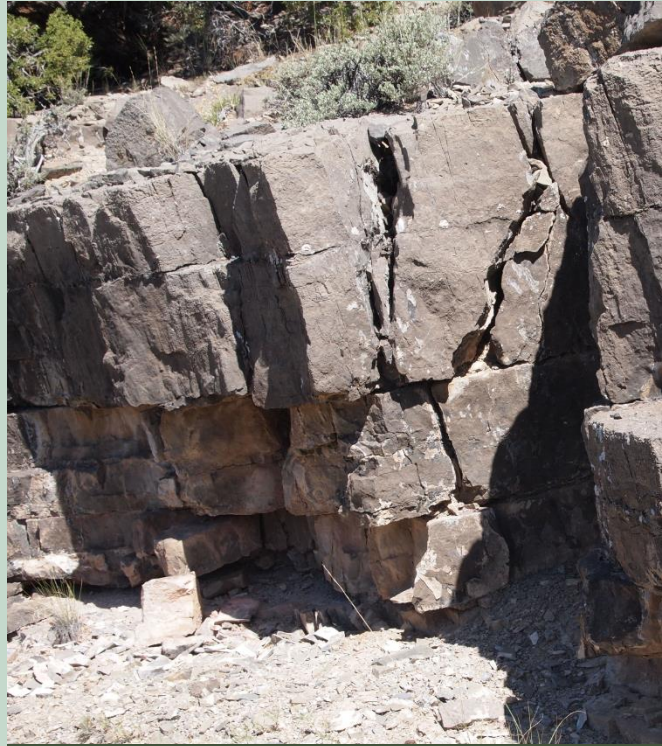

***Fracture permeability***

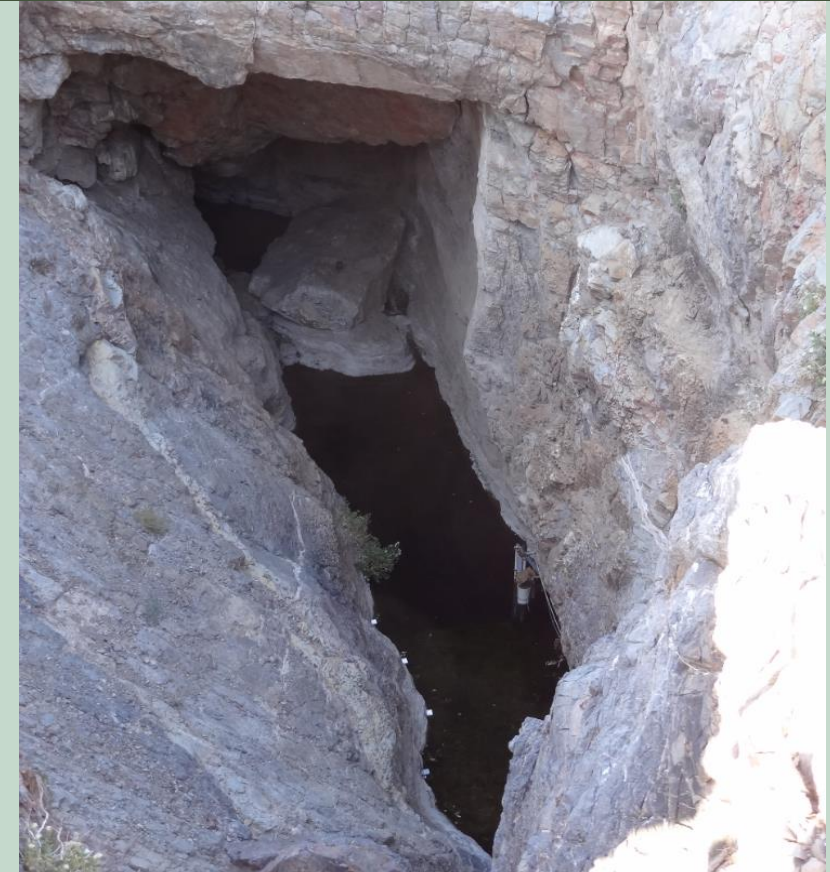

***Solution-enhanced fault openings***

- ***Low matrix porosity***
- ***Fracture-related permeability***
- ***Multiple fractured formations***
- ***Not much karst!***

# Geologic setting of Great Basin National Park

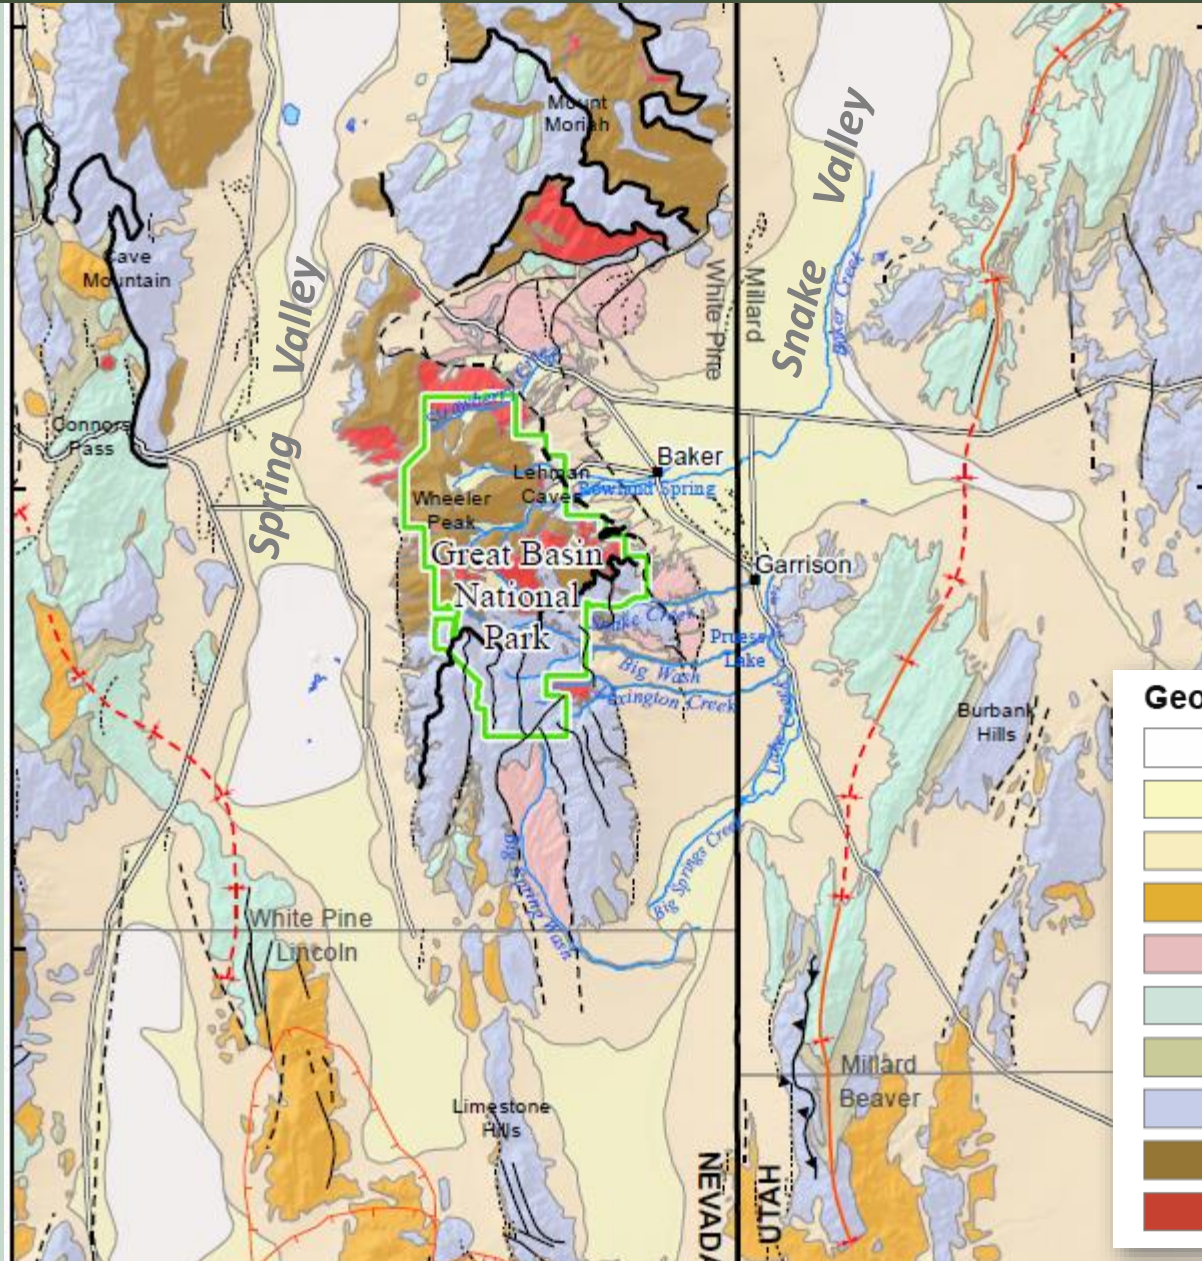

- Snake Range a regional-scale anticline, flanked by two synclines
- Thick section of marine carbonates and black shales in Snake Valley
- Northern part of the Park: siliciclastic rocks, intrusive rocks, surface drainage
- Southern part of Park: faulted carbonate rocks, lack of surface drainage

## Geologic Unit

- |  |                                                    |
|--|----------------------------------------------------|
|  | Playa deposits                                     |
|  | Younger alluvium and valley fill                   |
|  | Older alluvium and alluvial fans                   |
|  | Cenozoic volcanic rocks, undivided                 |
|  | Miocene sedimentary rocks                          |
|  | Upper Paleozoic carbonate rocks                    |
|  | Mississippian siliciclastic rocks                  |
|  | Lower Paleozoic carbonate rocks                    |
|  | Proterozoic and Lower Cambrian siliciclastic rocks |
|  | Intrusive rocks, undivided                         |

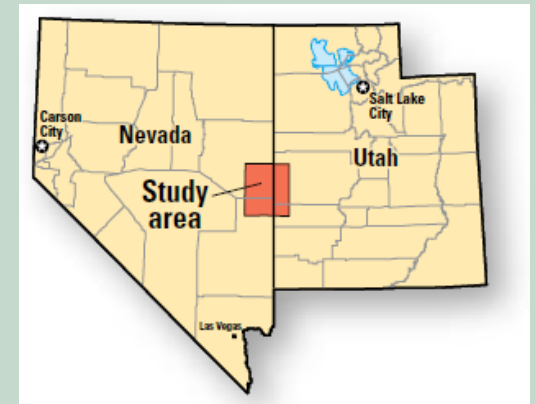

# Faulting and uplift of the Snake Range

## Low-angle fault near range front

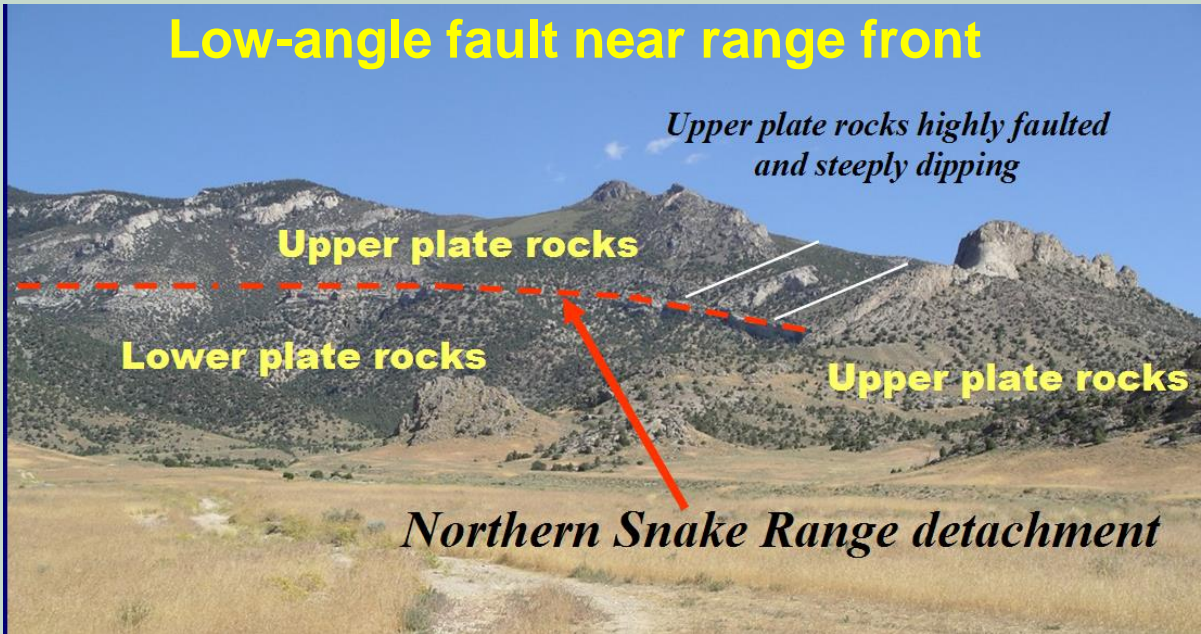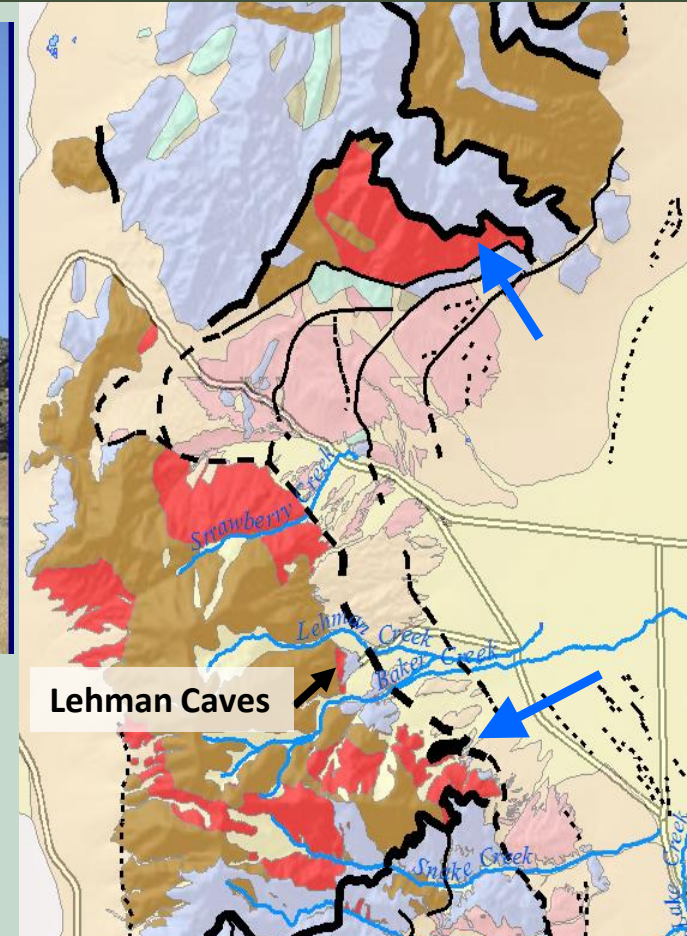

- Low-angle and high-angle faults near range front
- Youngest intrusions are 36 Ma Young Canyon pluton, 28.5 Ma aplite
- Faulting causes considerable Miocene uplift of range block
- Footwall, lower-plate rocks (including Pole Canyon Limestone) are foliated and metamorphosed

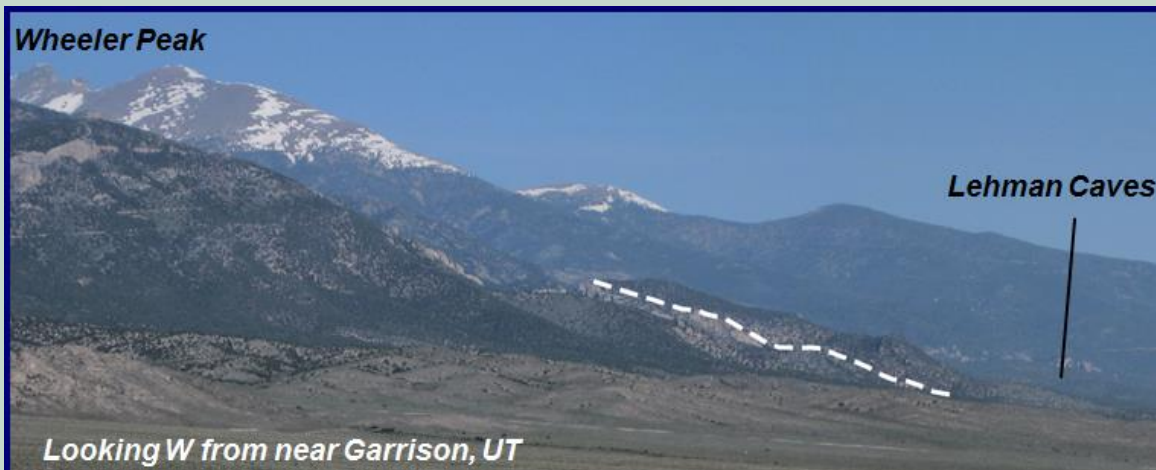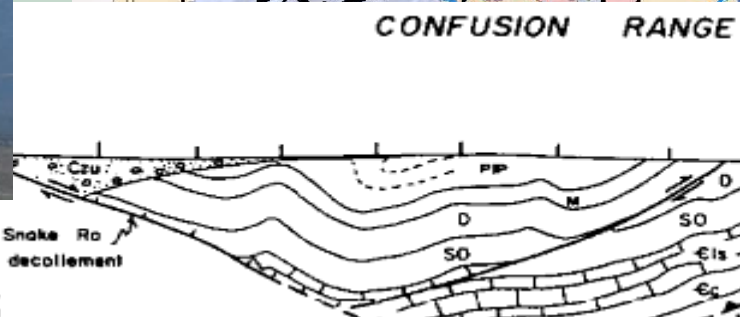

# Geologic setting of Great Basin National Park

Stratigraphic section, north end of southern Snake Range

1

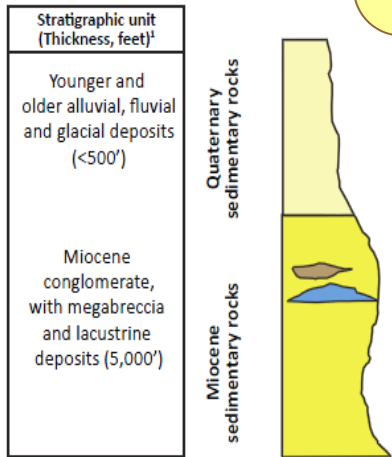

Middle Cambrian and Ordovician carbonate rocks occur as local faulted blocks. Ordovician through Permian rocks have been removed by faulting and are not exposed, but are possibly present in subsurface

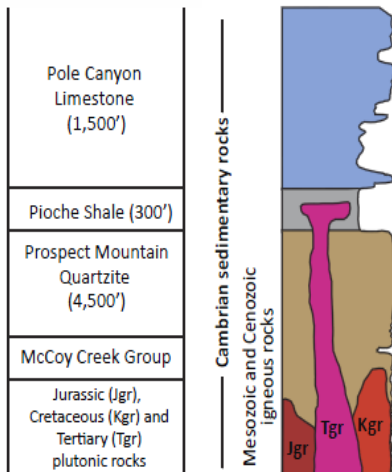

<sup>1</sup> Generalized unit thickness after Miller and others (1995).

Stratigraphic section, south end of southern Snake Range and vicinity

2

| Age           | Stratigraphic unit (Thickness, feet) <sup>2</sup>       |
|---------------|---------------------------------------------------------|
| CENOZOIC      | Younger and older alluvial and fluvial deposits (<500') |
|               | Miocene and Pliocene basin-fill deposits (5,000')       |
|               | Oligocene volcanic rocks                                |
| PERM.         | Arcturus Formation (2,500')                             |
| PENN.         | Ely Limestone (2,500')                                  |
| MISSISSIPPIAN | Chainman Shale (1,800')                                 |
|               | Joanna Limestone (500')                                 |
|               | Pilot Shale (500')                                      |
|               | Guilmette Formation (3,500')                            |
| DEVONIAN      | Simonson Dolomite (650')                                |
|               | Sevy Dolomite (1,300')                                  |
|               | Laketown Dolomite (1,500')                              |
|               | Ely Springs Dolomite (350')                             |
| SIL.          | Eureka Quartzite (500')                                 |
|               | Pogonip Group (1,600')                                  |
| ORDOVICIAN    |                                                         |

<sup>2</sup> Generalized unit thickness after Hintze and Davis (2003).

SIL., Silurian; PENN., Pennsylvanian; PER., Permian

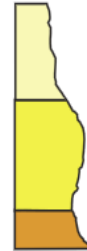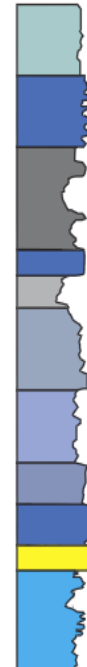

preCambrian and Confusion Range

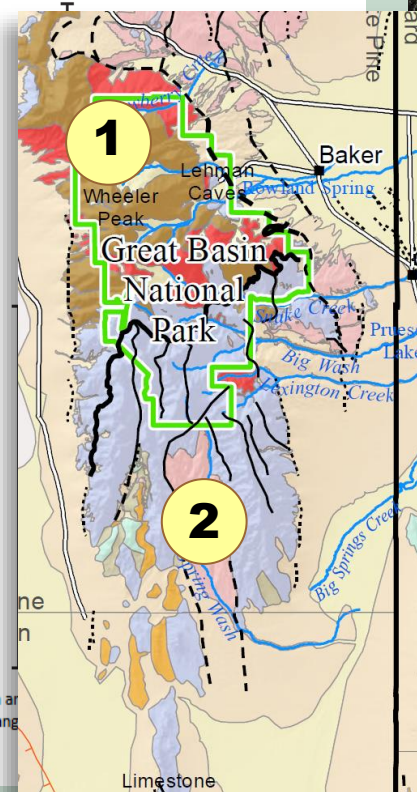

Prospect Mountain quartzite

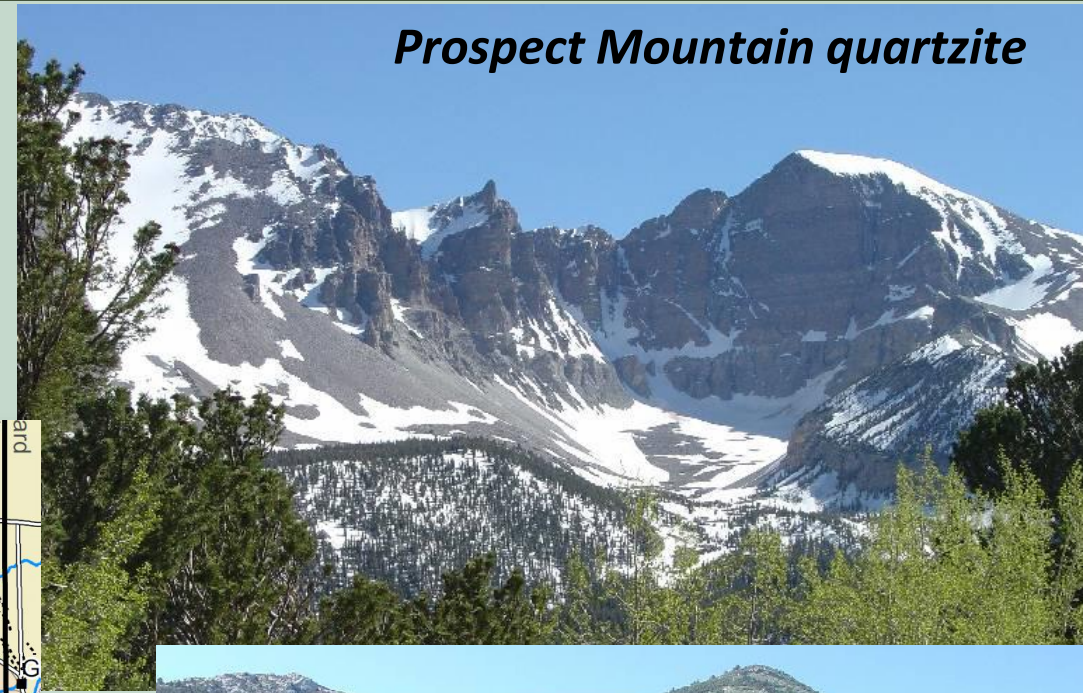

Prospect Mountain quartzite + local intrusive rocks

Pole Canyon Limestone

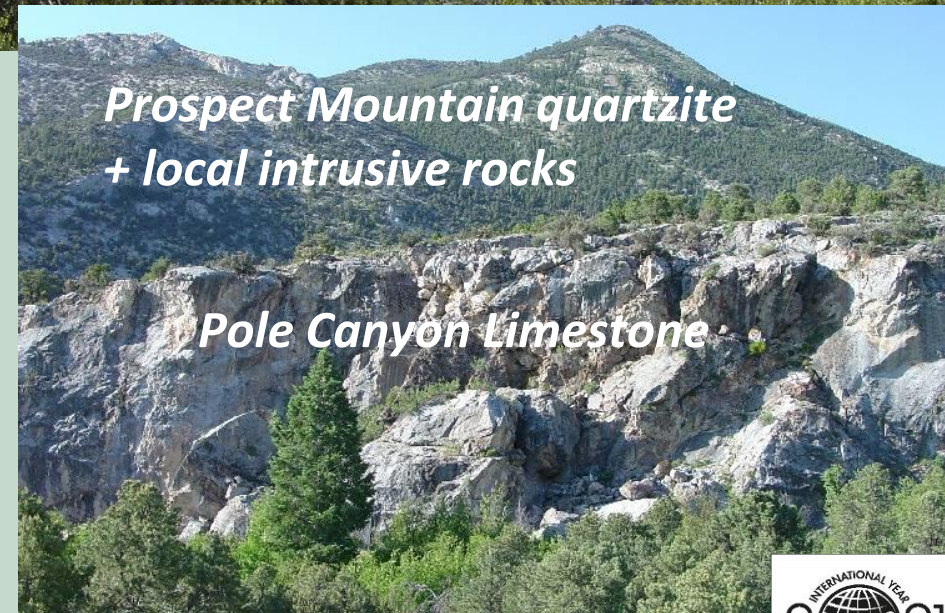

# Geologic setting of Lehman Caves

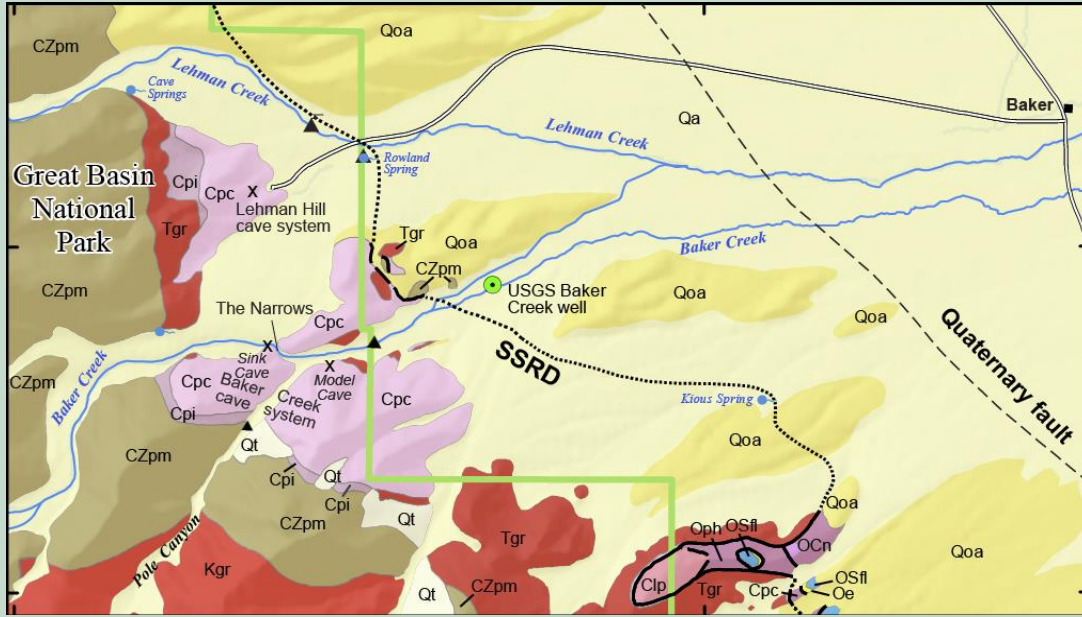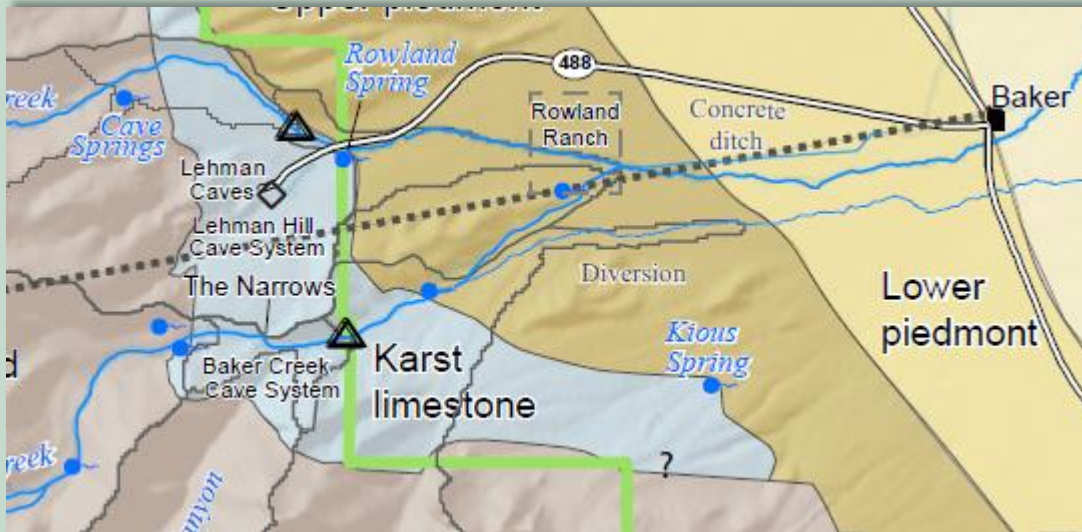

Stratigraphic section, north end of southern Snake Range

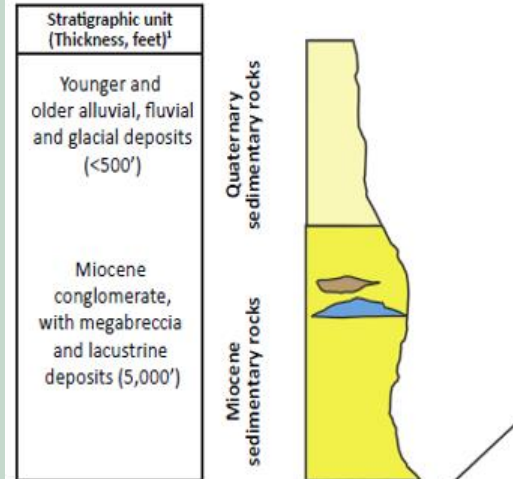

Middle Cambrian and Ordovician carbonate rocks occur as local faulted blocks. Ordovician through Permian rocks have been removed by faulting and are not exposed, but are possibly present in subsurface

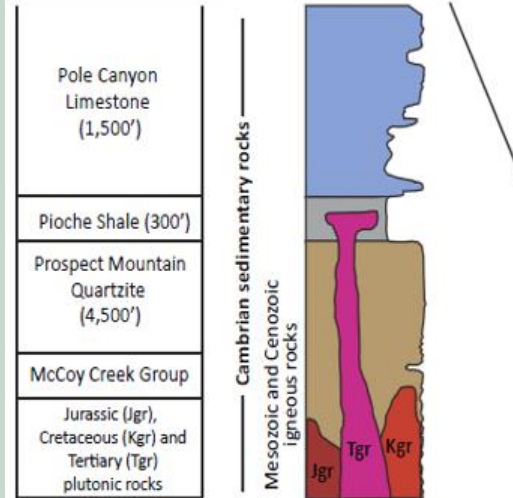

<sup>1</sup>Generalized unit thickness after Miller and others (1995).

- Extensive cave development in Pole Canyon Limestone
- Subsurface extent of limestone is limited

# Geologic setting of Lehman Caves

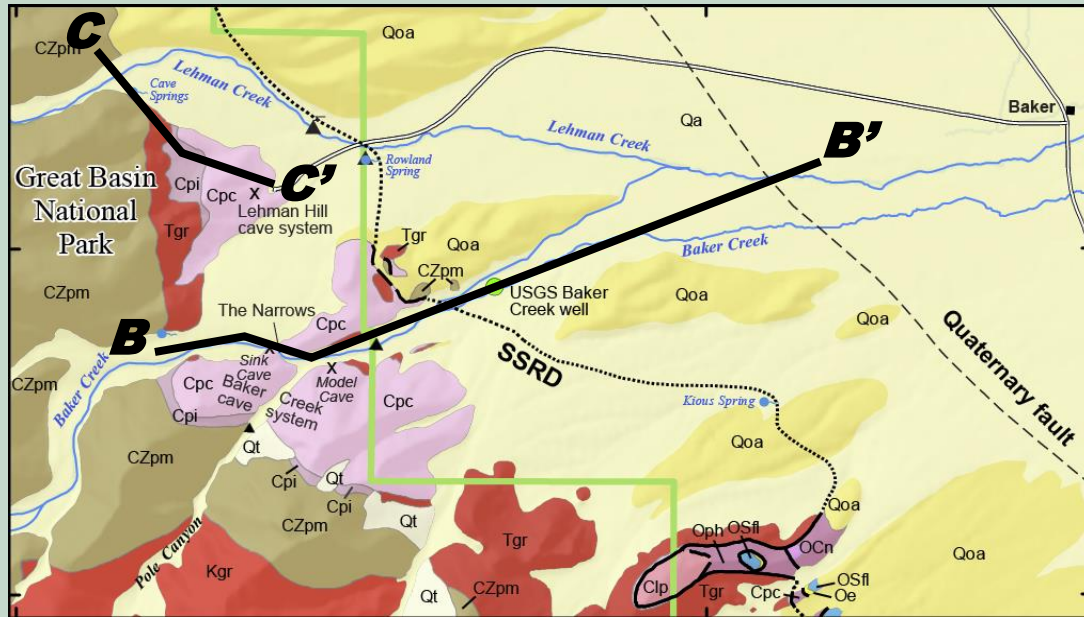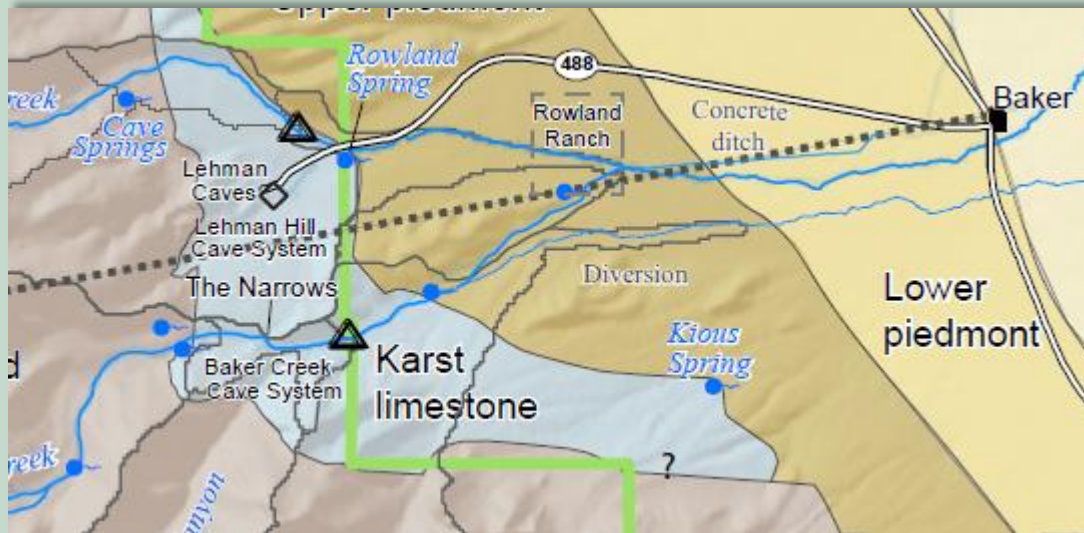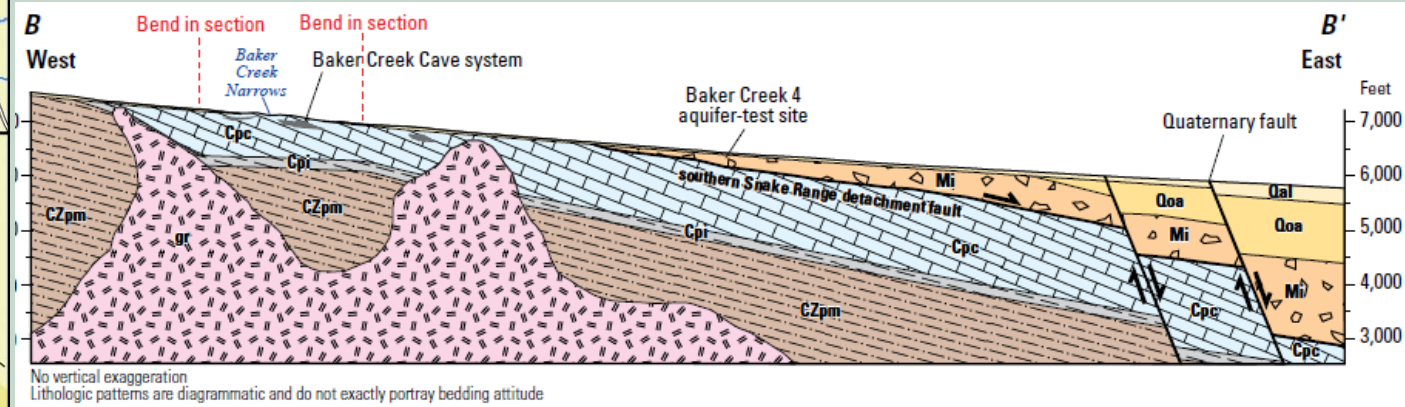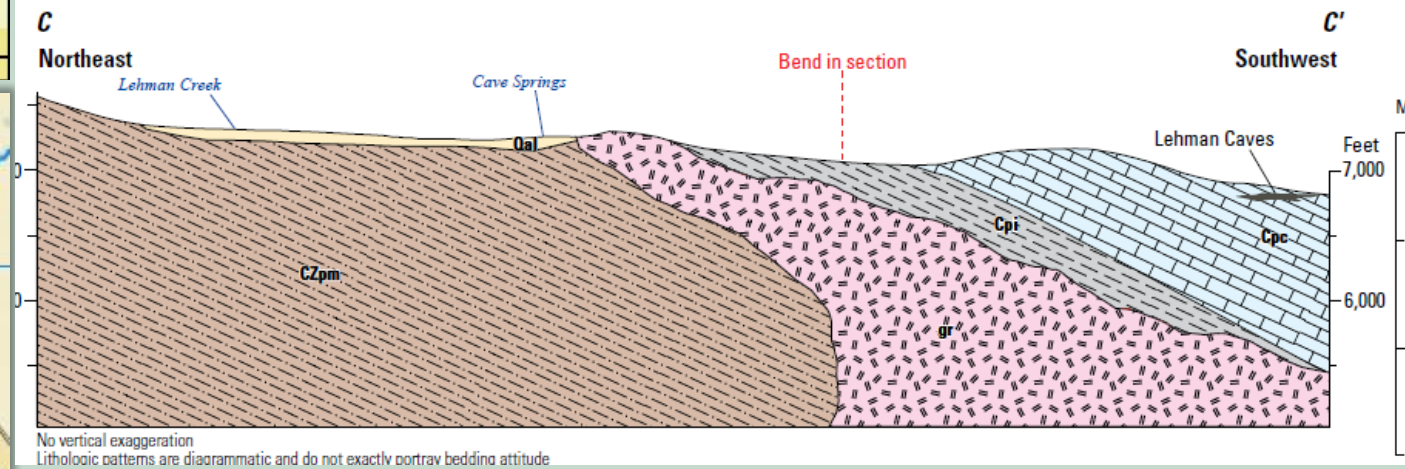

# Hydrogeologic questions

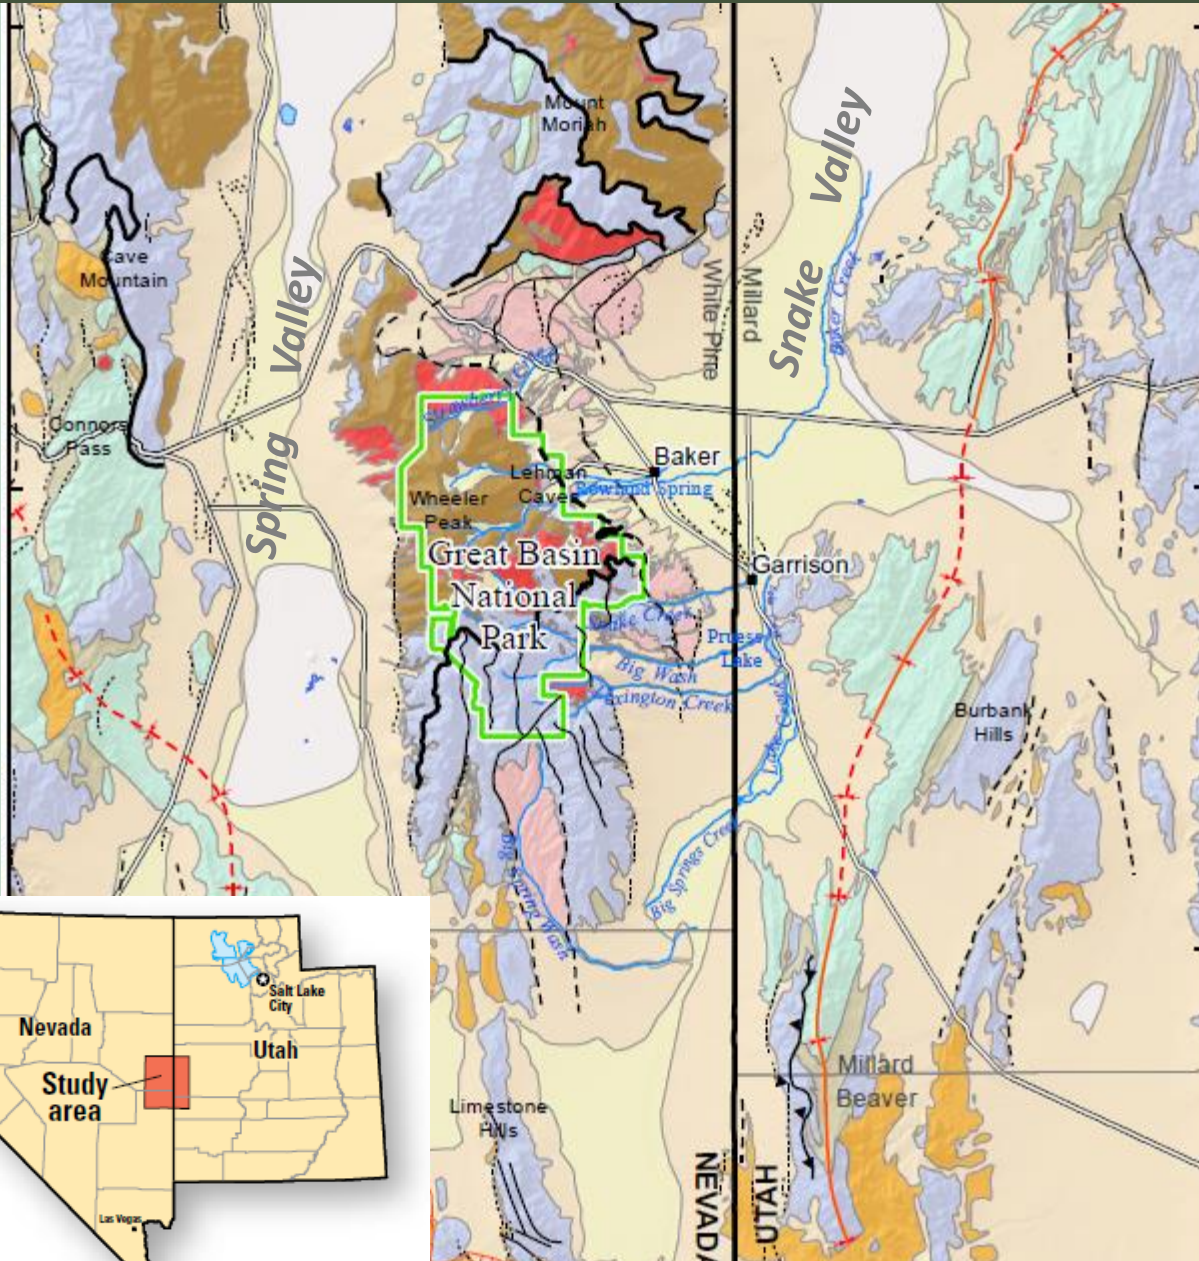

- Deep subsurface extent of carbonate rocks and cavernous porosity to east of Lehman Caves
- Connection between Pole Canyon Limestone and either basin-fill or deep carbonate aquifers in Snake Valley
- Precise uplift and thermal history of the southern Snake Range since Miocene time
- Paleohydrology of Snake Valley during and after extension, uplift, and Miocene intrusions

***On to the cave tour!***
