# Supplementary material
Source: publisher figshare collection journal article supplement (https://gsapubs.figshare.com/articles/dataset/_/16620391)
Supplement: Supplementary file 1 [file 3 › 061-05_Stops 1-4 - Sulfidic Caves.pdf]

# HYPOGENIC KARST OF THE GREAT BASIN

A Virtual Field Trip for the GSA Cordilleran Section Meeting  
10 May 2021

Louise D. Hose (UNR), Harvey R. DuChene (KWI), Daniel Jones (NMT & NCKRI), Gretchen Baker (NPS), Zoë Havlena (NMT), Donald Sweetkind (USGS), and Doug Powell (USFS)

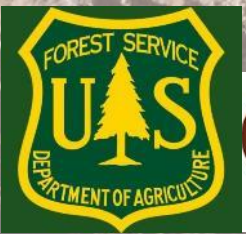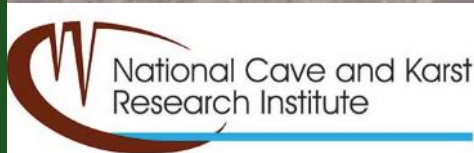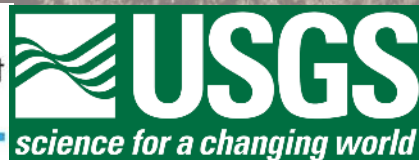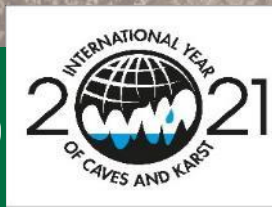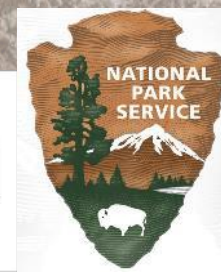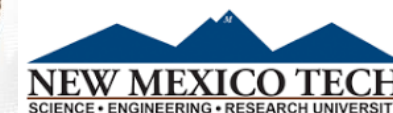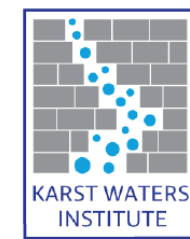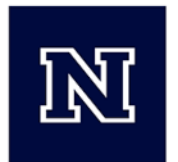

University of Nevada, Reno

# INTRODUCTION

## ➤ Introduction

0900 PDT: Louise Hose

- Stop 1 – Cueva de Villa Luz 0910 PDT
- Stop 2 – Frasassi Caves 0935 PDT
- Stop 3 – Carlsbad Cavern 1000 PDT
- Stop 4 – Lechuguilla Cave 1020 PDT
- Stop 5 – Sacramento Pass 1045 PDT
- Break/Intermission 1105 PDT
- Stop 6 – Lehman Caves 1110 PDT
- Break/Intermission 1250 PDT
- Stop 7 – Burial Cave 1255 PDT
- Stop 8 – Crystal Ball Cave 1305 PDT
- Stop 9 - Pescio Cave 1315 PDT
- Stop 10 – Discovery Cave 1325 PDT
- Stop 11 – Old Mans Cave 1335 PDT
- Summary and questions 1345 PDT

- Many (but certainly not all) eastern Nevada caves do NOT fit the “traditional” models of cave formation (speleogenesis)
  - Long understood to have formed under phreatic conditions

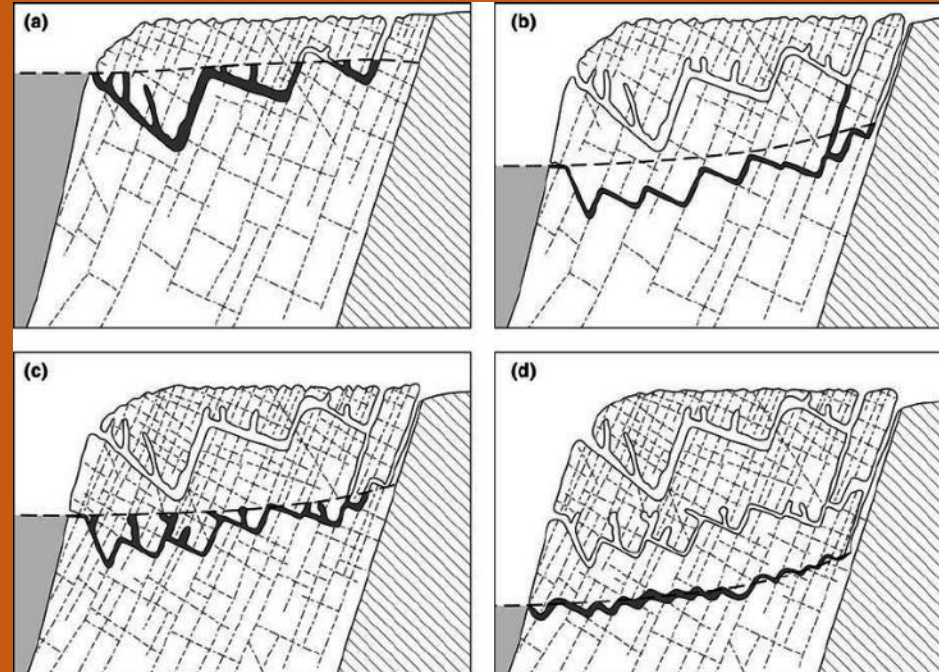

# INTRODUCTION

- In the 1970s, speleologists began to understand the role of hypogenic (rising) groundwater flow along with sulfidic water.
  - Deep-seated artesian flow (e.g., J. Quinlan—Bottomless Lakes –cenotes, NM).
  - Also earlier workers proposed a role for sulfuric acid (e.g., S. Egemeier—Kane Caves, WY, & Carlsbad Cavern, NM).
  - Mostly viewed as real processes but isolated cases.

# INTRODUCTION

- Mid-1980s: Discovery of Lechuguilla Cave, NM (paleo-sulfidic cave)
  - Spectacular and abundant gypsum deposits
  - Elemental sulfur deposits

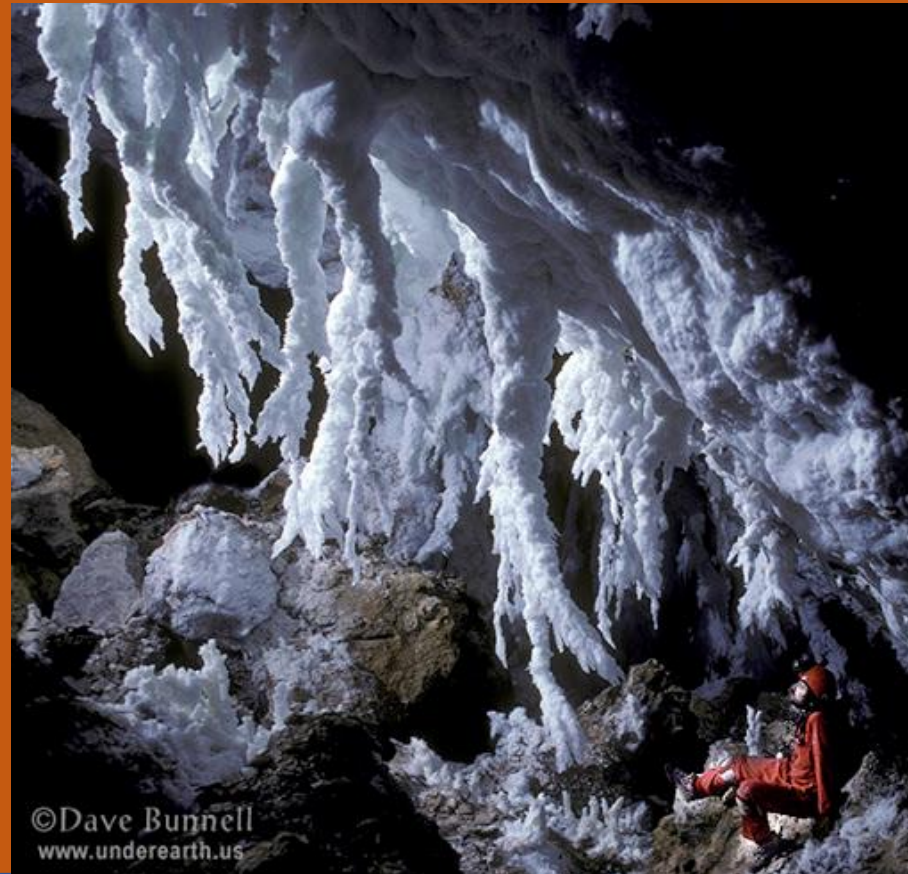

©Dave Bunnell  
www.underearth.us

# INTRODUCTION

- Mid-1980s: Discovery of Cueva de Villa Luz (active, sulfidic cave), Mexico

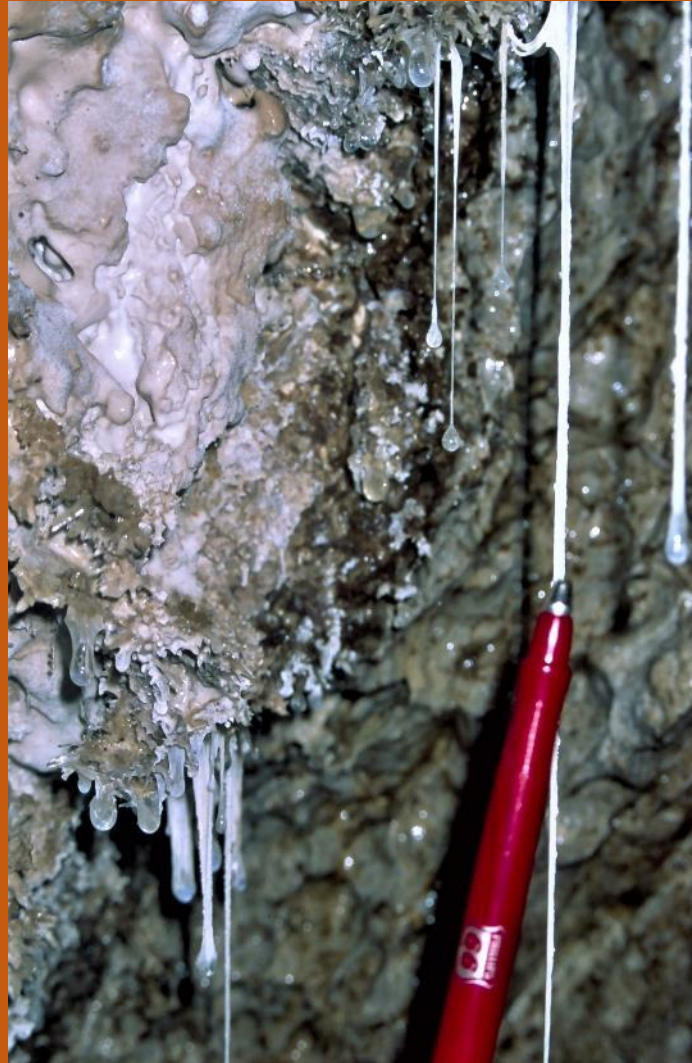

*Hypogenic Caves of the Great Basin: Introduction*

# INTRODUCTION

- Mid-1980s: Discovery of Frasassi caves (active and paleo-sulfidic caves), Italy.

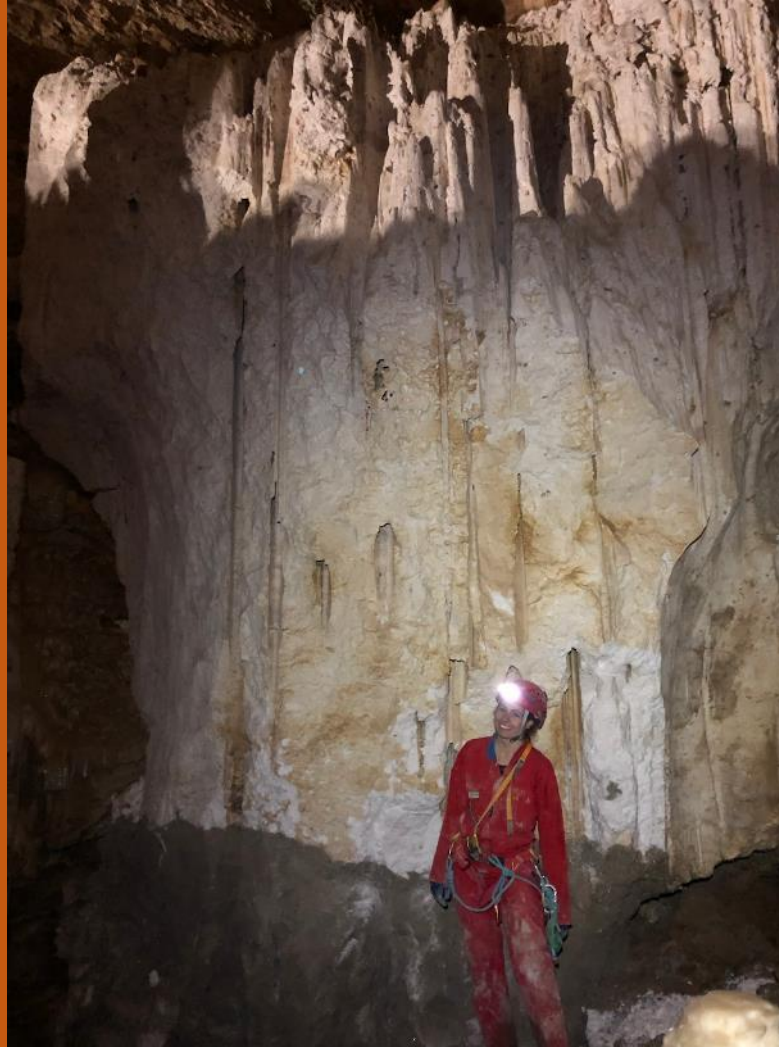

# INTRODUCTION

- What all these caves have in common during their active phases included:
  - Thermal, sulfidic waters rose from depth
  - Waters released  $\text{H}_2\text{S}$  and/or  $\text{SO}_2$  as well as  $\text{H}_2\text{O}$  vapor at the top of the groundwater table. Probably also released  $\text{CO}_2$ .
  - Water vapor is/was warmer than bedrock, causing condensation.
    - Condensate absorbs the gases, forming  $\text{H}_2\text{SO}_4$  (and probably  $\text{H}_2\text{CO}_3$ ).
  - The sulfuric acid reacts with the calcite (limestone) to form gypsum.

# INTRODUCTION

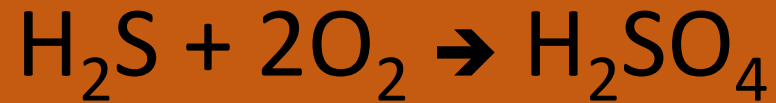

Sulfuric Acid

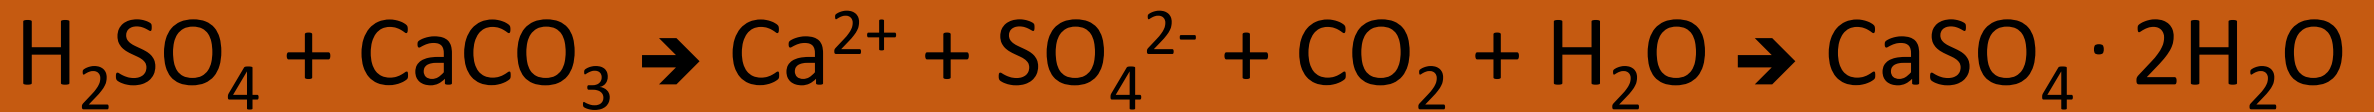

Calcite

Gypsum

*Microbes greatly facilitate these reactions*

# INTRODUCTION

- Field trip is organized in two parts
- Part I – Established, well-studied, hypogenic, sulfidic caves
  - Cueva de Villa Luz, Mexico (active)
  - Frasassi caves, Italy (active & paleo)
  - Carlsbad Cavern & Lechuguilla Cave, NM (paleo)

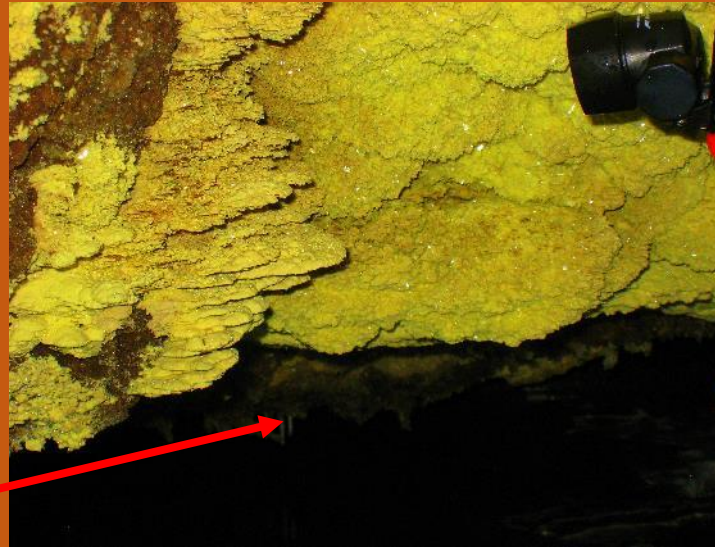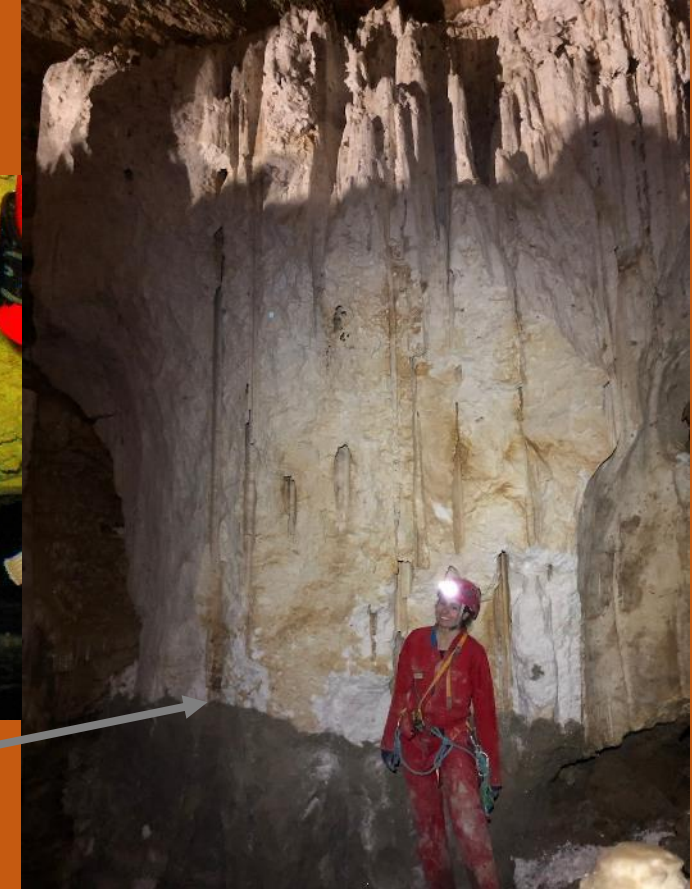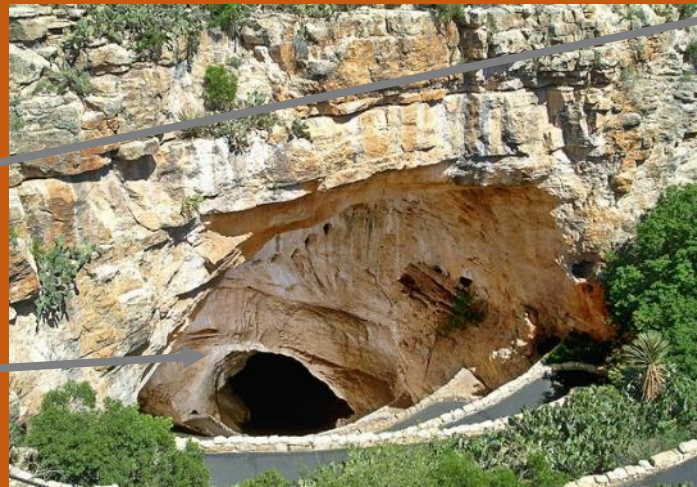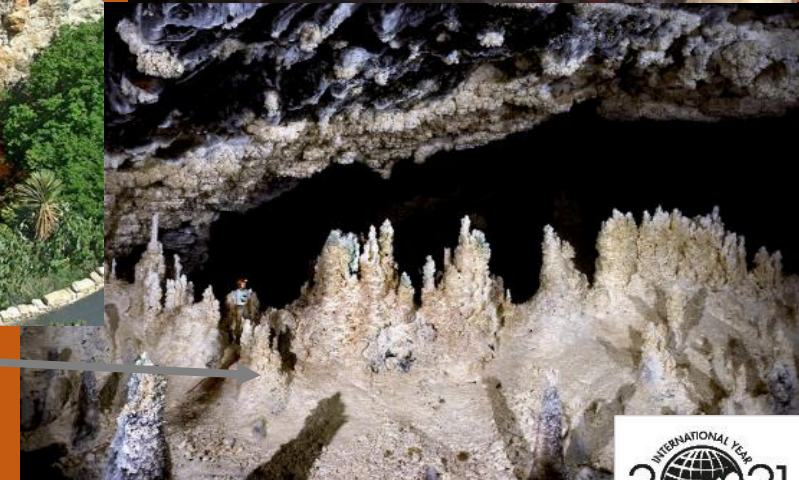

# INTRODUCTION

- Field trip is organized in two parts
- Part I – Established, well-studied, hypogenic, sulfidic caves

- Cueva de Villa Luz, Mexico (active)

- Frasassi caves, Italy (active & paleo)

- Carlsbad Cavern & Lechuguilla Cave, NM (paleo)

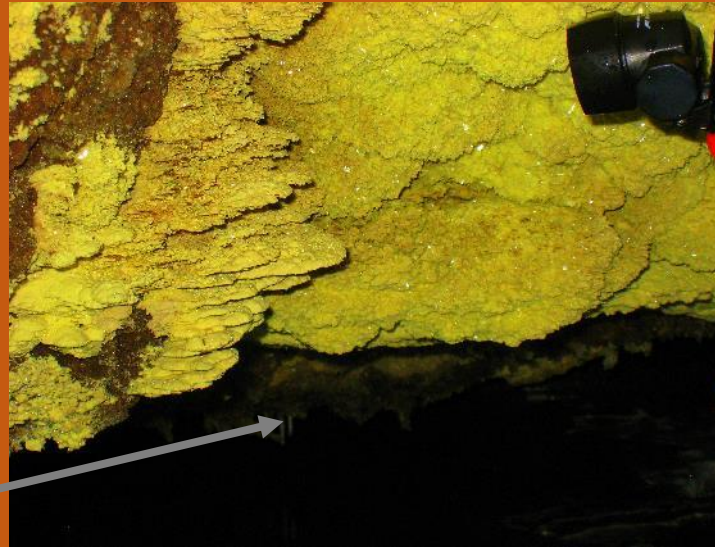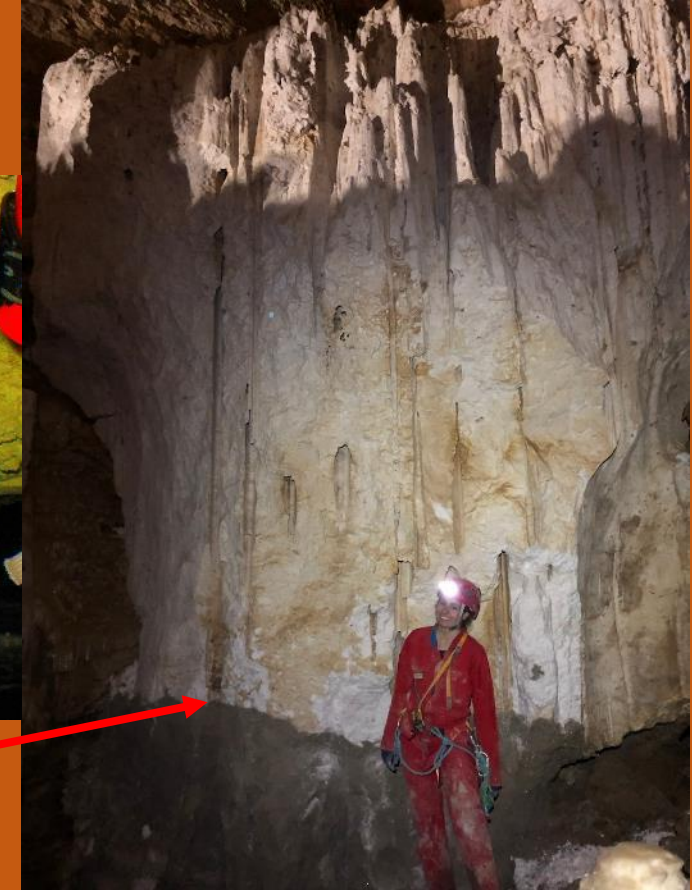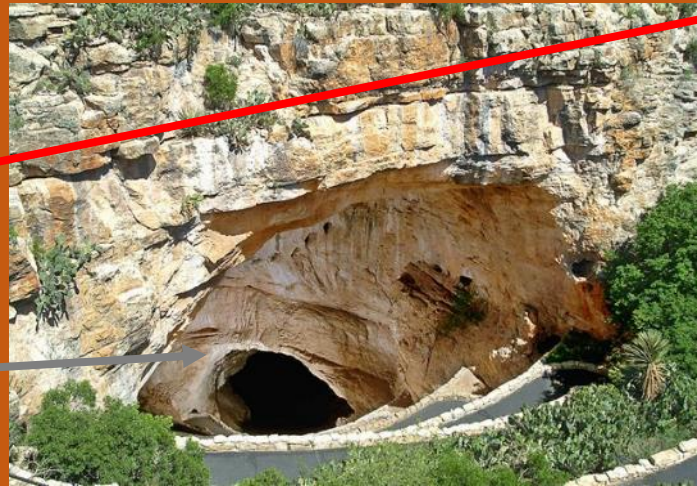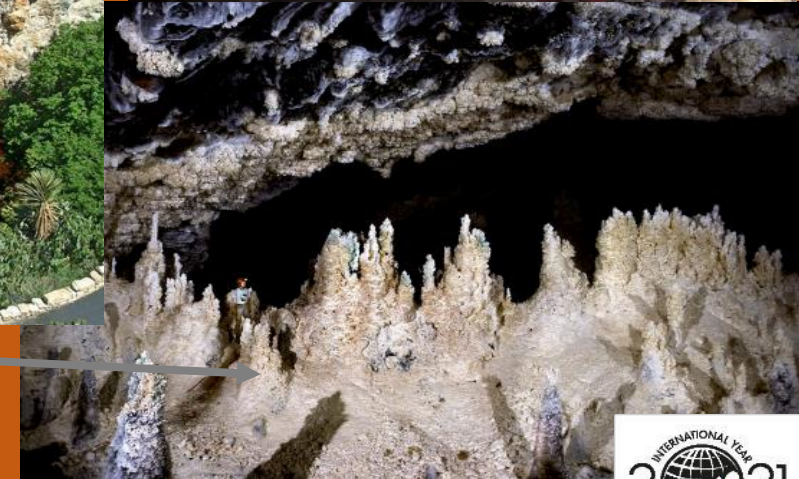

# INTRODUCTION

- Field trip is organized in two parts
- Part I – Established, well-studied, hypogenic, sulfidic caves
  - Cueva de Villa Luz, Mexico (active)
  - Frasassi caves, Italy (active & paleo)
  - Carlsbad Cavern & Lechuguilla Cave, NM (paleo)

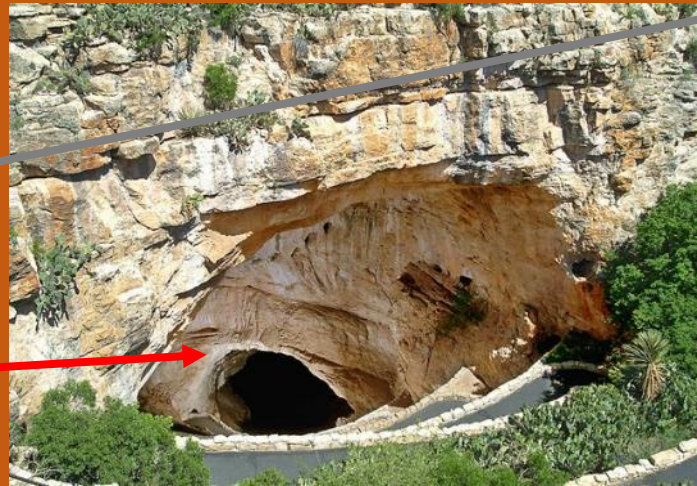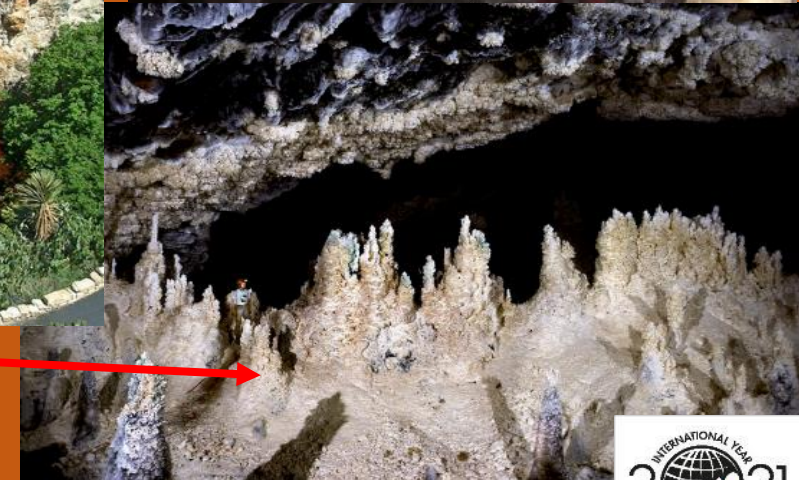

# INTRODUCTION

- Part II – A few potential hypogenic, sulfidic caves in the Great Basin
  - Geologic setting – Sacramento Pass
  - Stop 6 – Lehman Caves
  - Stops 7-11 – Other suspected hypogenic, SAS caves

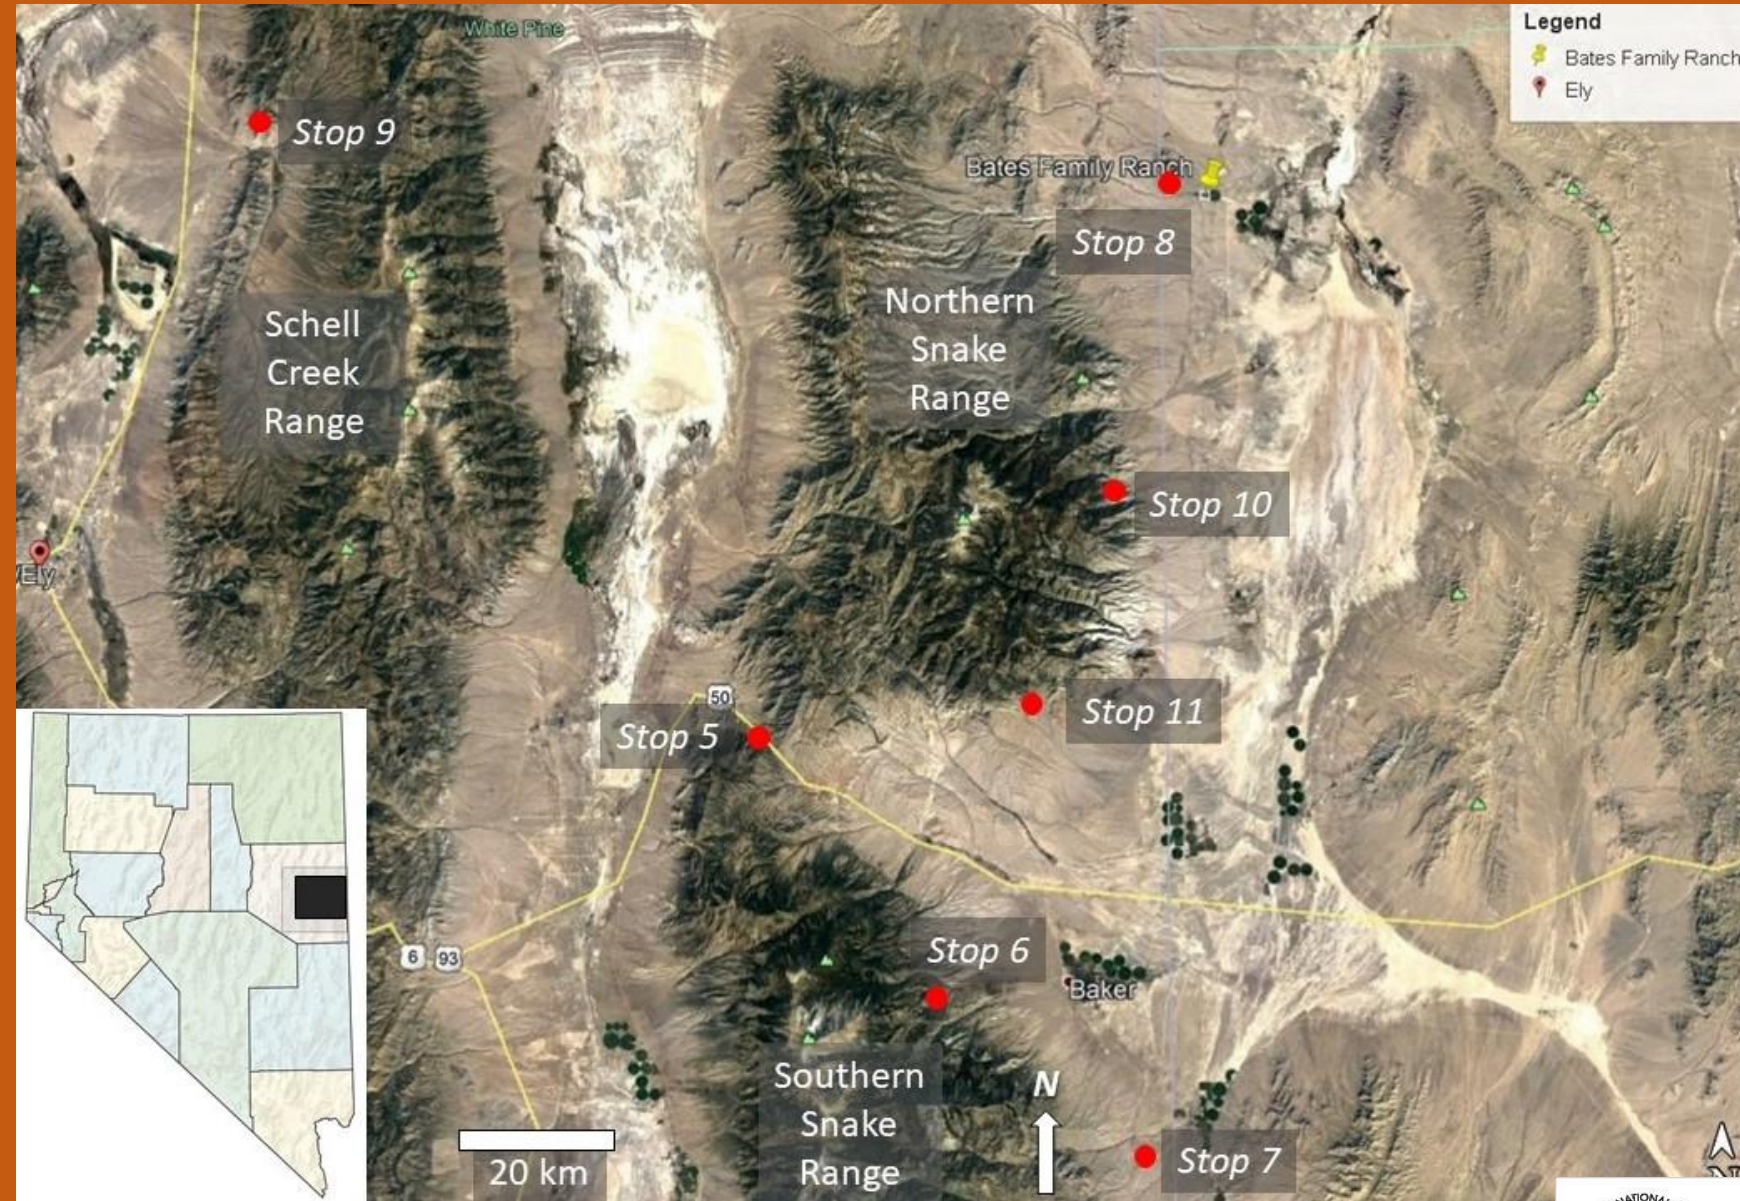

# CUEVA DE VILLA LUZ

- Introduction 0900 PDT
- **Stop 1 – Cueva de Villa Luz 0910 PDT**  
**Louise Hose**
- Stop 2 – Frasassi Caves 0935 PDT
- Stop 3 – Carlsbad Cavern 1000 PDT
- Stop 4 – Lechuguilla Cave 1020 PDT
- Stop 5 – Sacramento Pass 1045 PDT
- Break/Intermission 1105 PDT
- Stop 6 – Lehman Caves 1110 PDT
- Break/Intermission 1250 PDT
- Stop 7 – Burial Cave 1255 PDT
- Stop 8 – Crystal Ball Cave 1305 PDT
- Stop 9 - Pescio Cave 1315 PDT
- Stop 10 – Discovery Cave 1325 PDT
- Stop 11 – Old Mans Cave 1335 PDT
- Summary and questions 1345 PDT

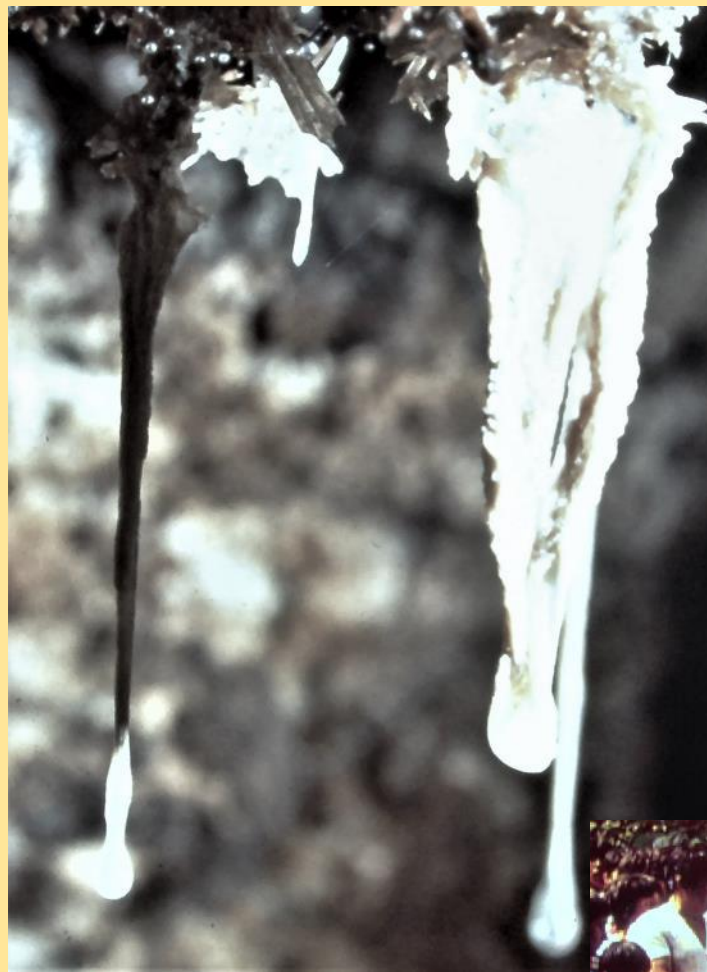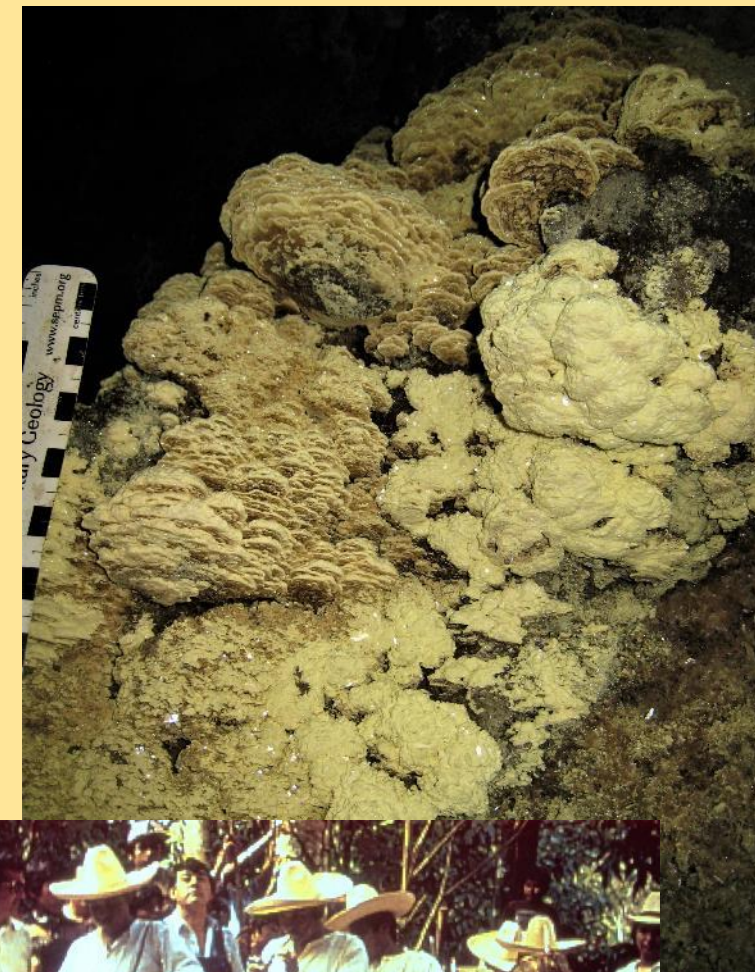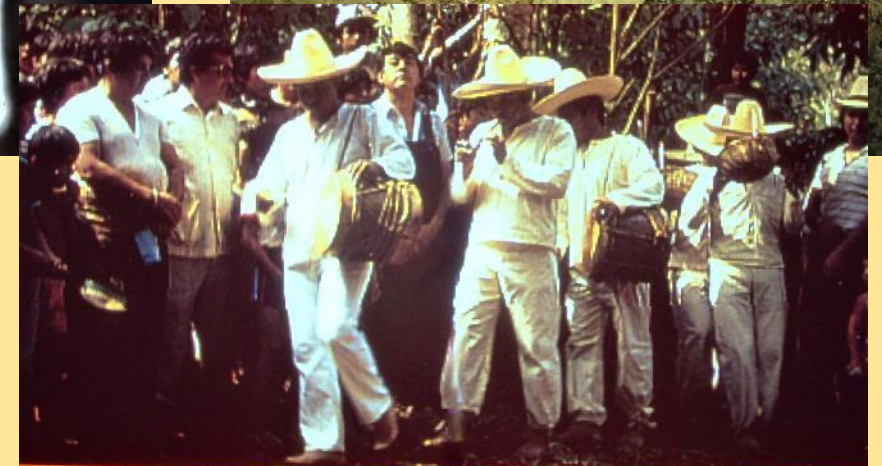

**Ritual de la Pesca de la Sardina**

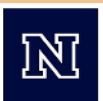

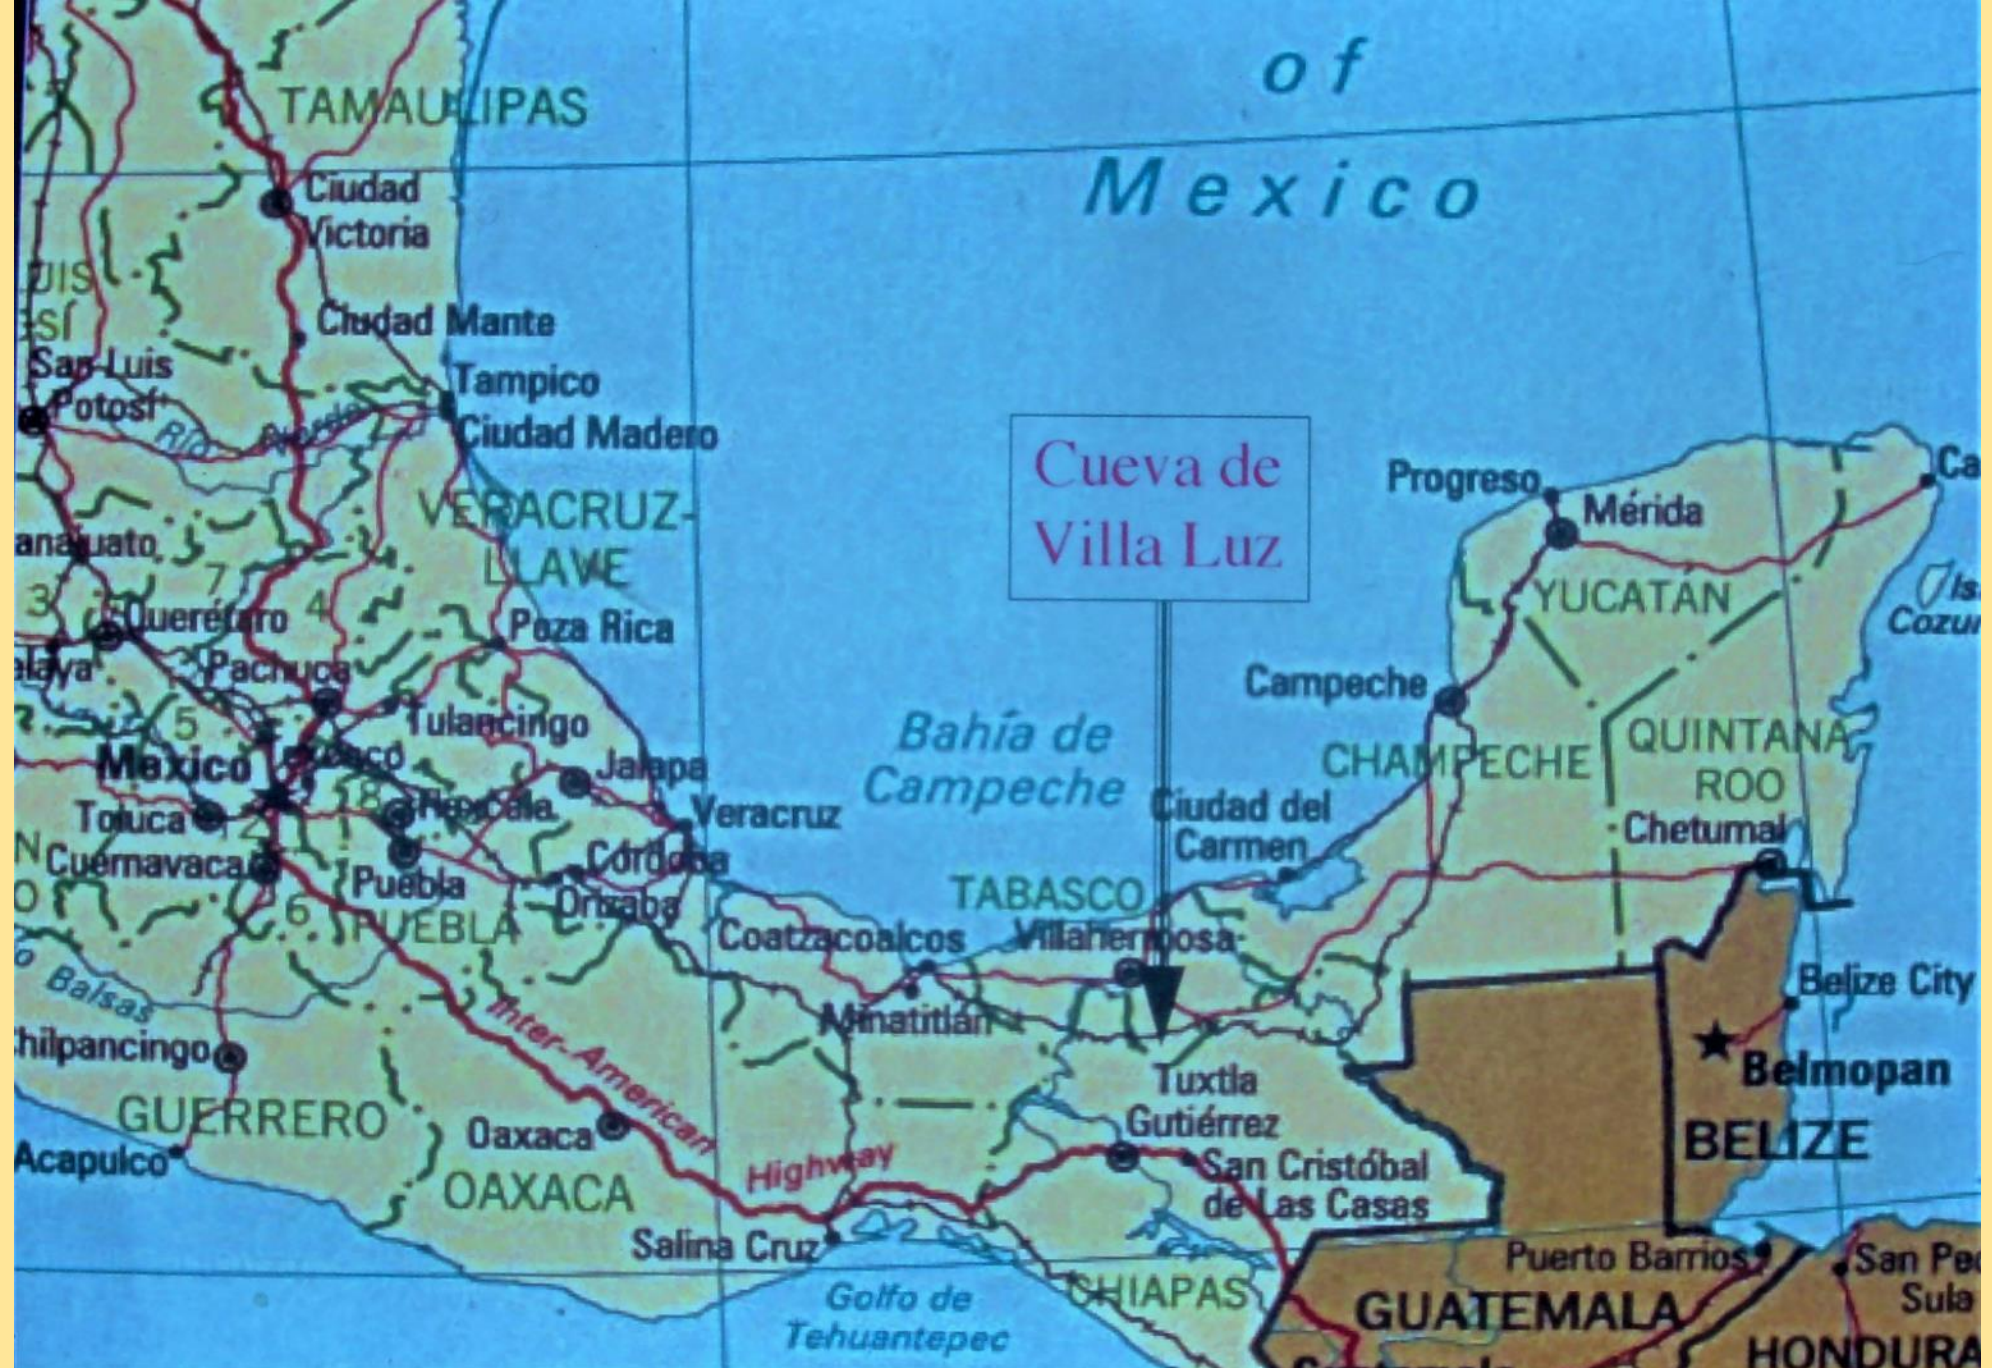

*Hypogenic Caves of the Great Basin: Cueva de Villa Luz*

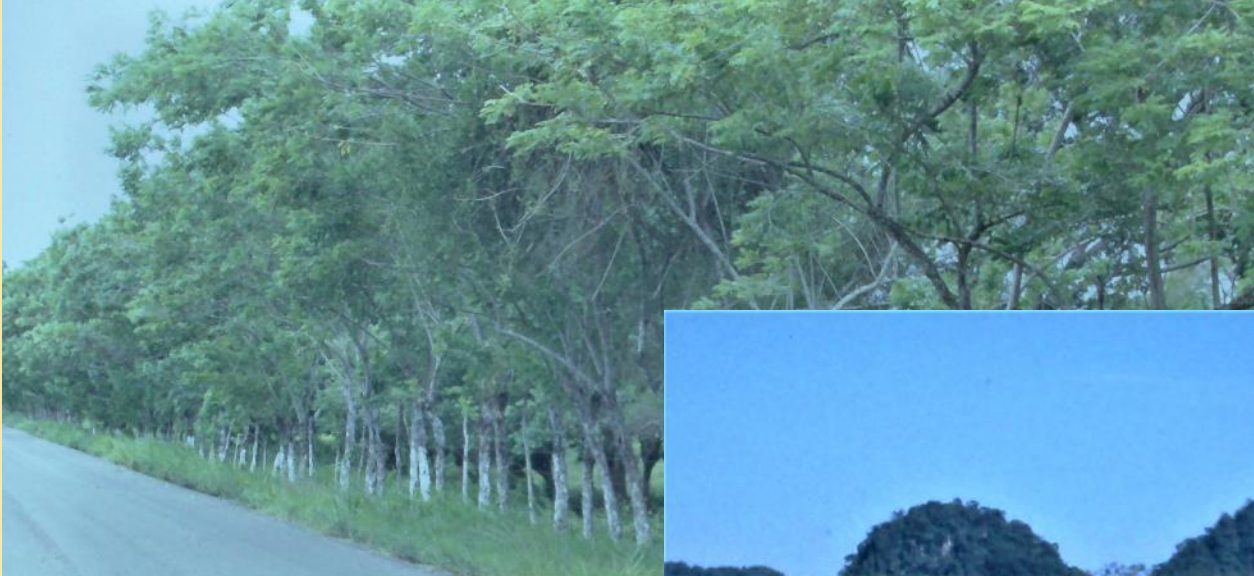

Living fence along the road  
from Villahermosa to Tapijulapa

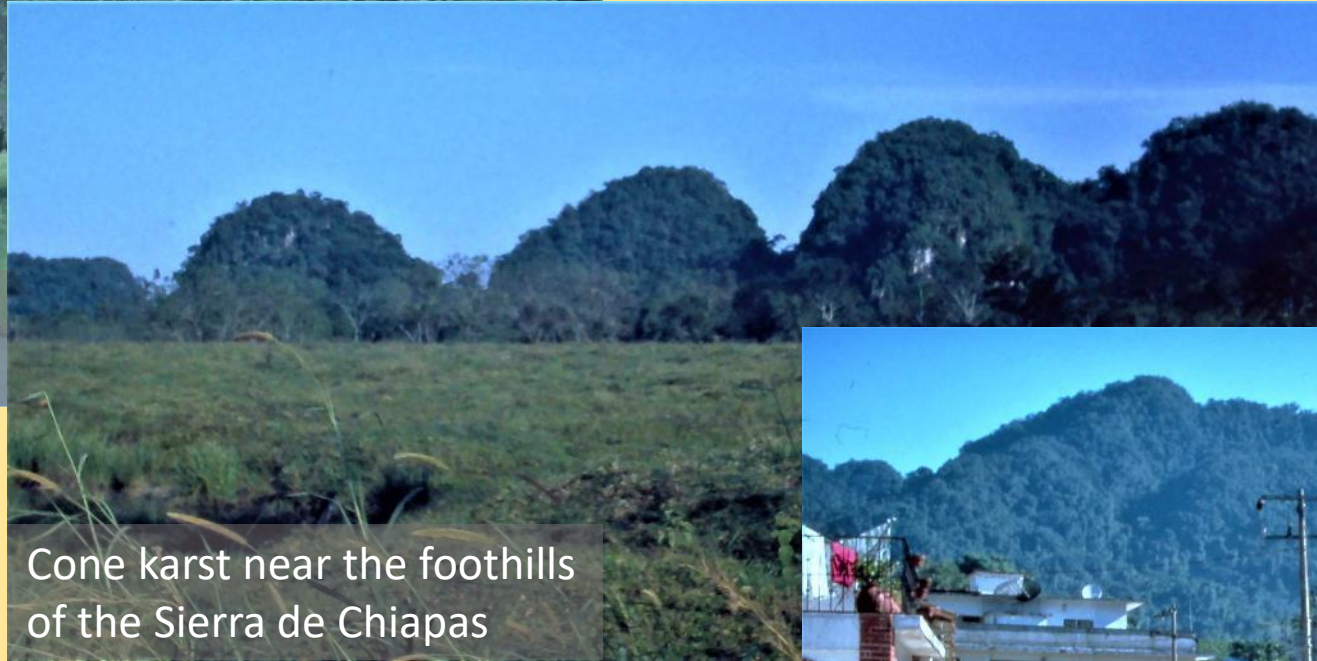

Cone karst near the foothills  
of the Sierra de Chiapas

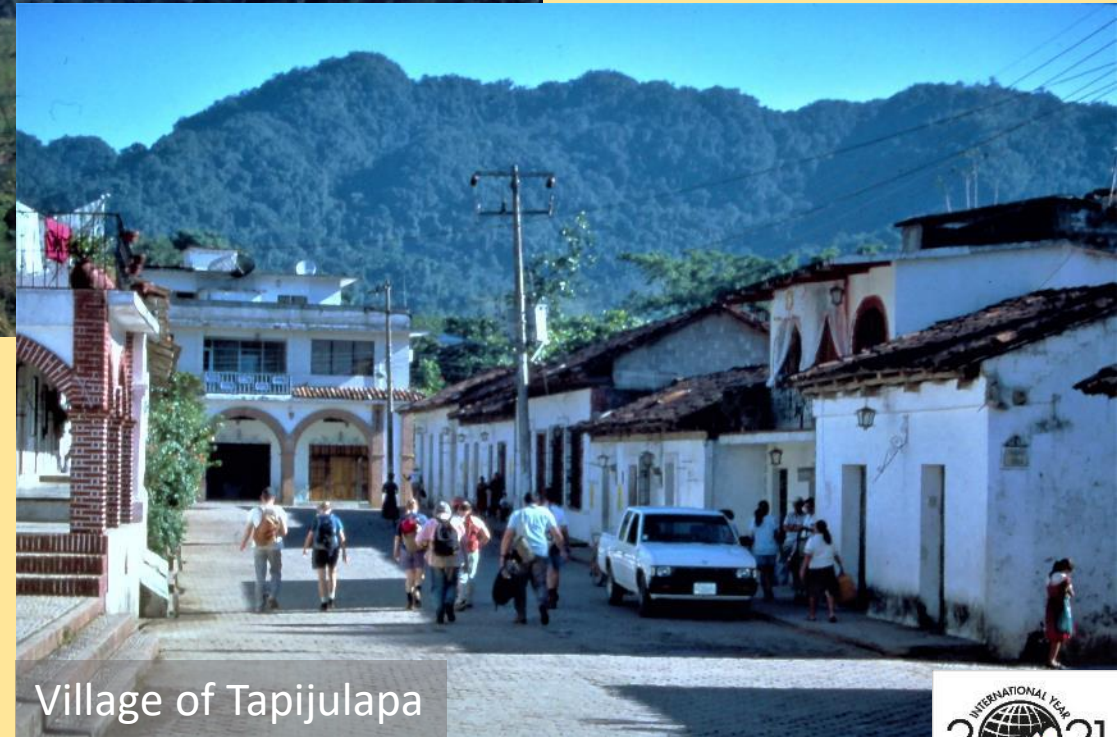

Village of Tapijulapa

*Hypogenic Caves of the Great Basin: Cueva de Villa Luz*

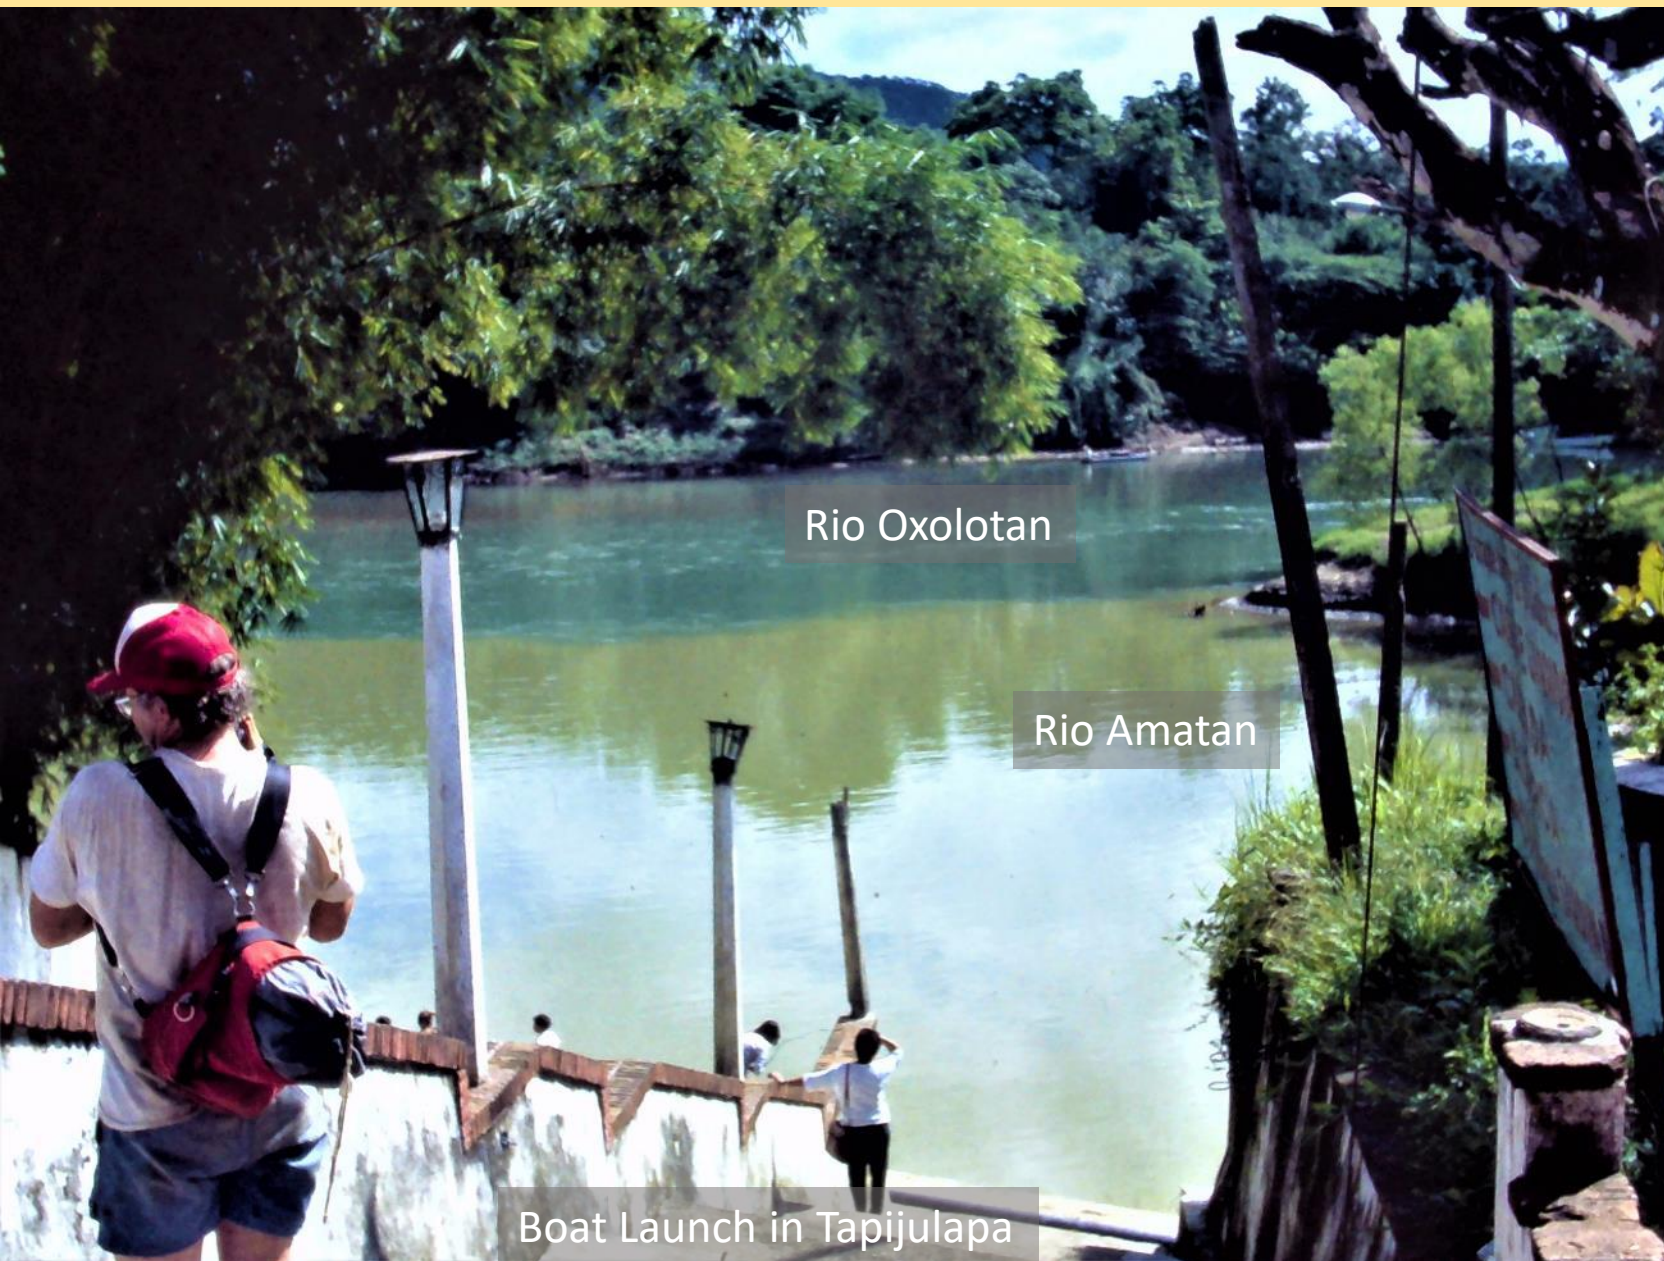

Rio Oxolotan

Rio Amatan

Boat Launch in Tapijulapa

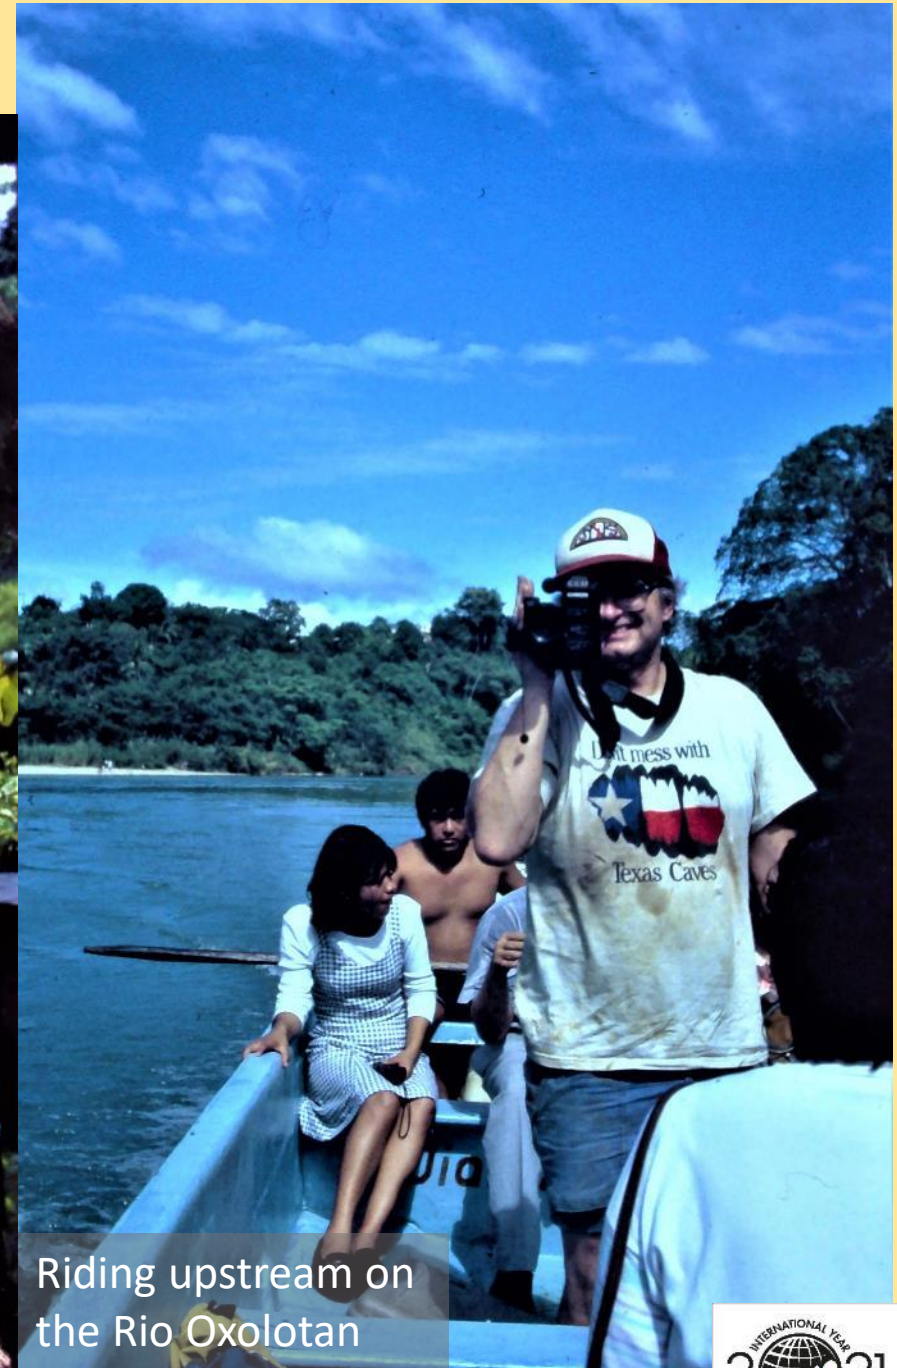

Riding upstream on  
the Rio Oxolotan

Through pastureland  
(Rancho Villa Luz), up  
the stairs, and into  
Parque Villa Luz.

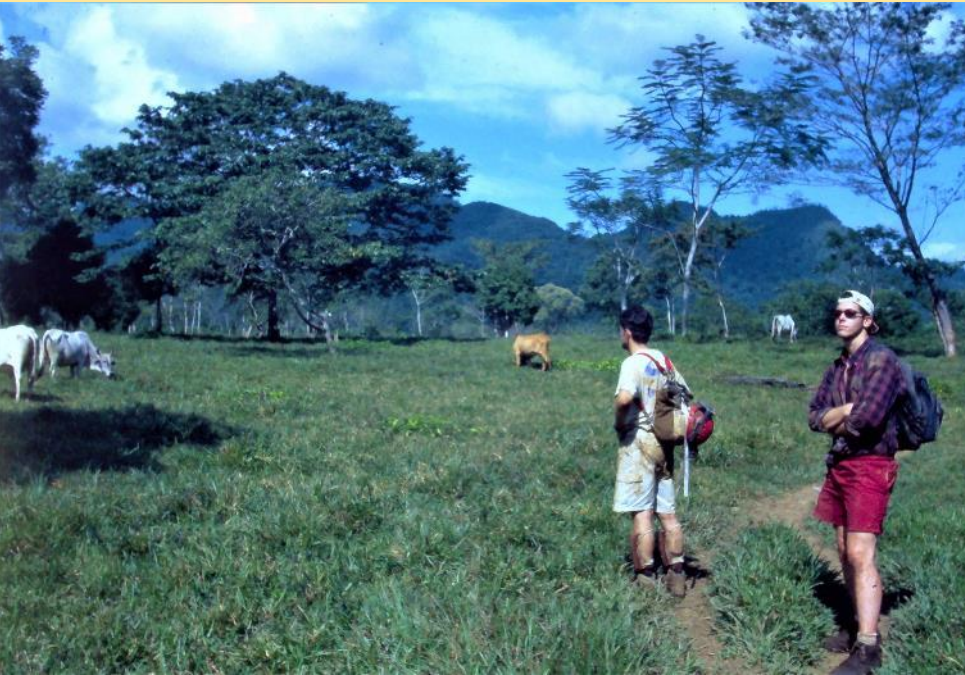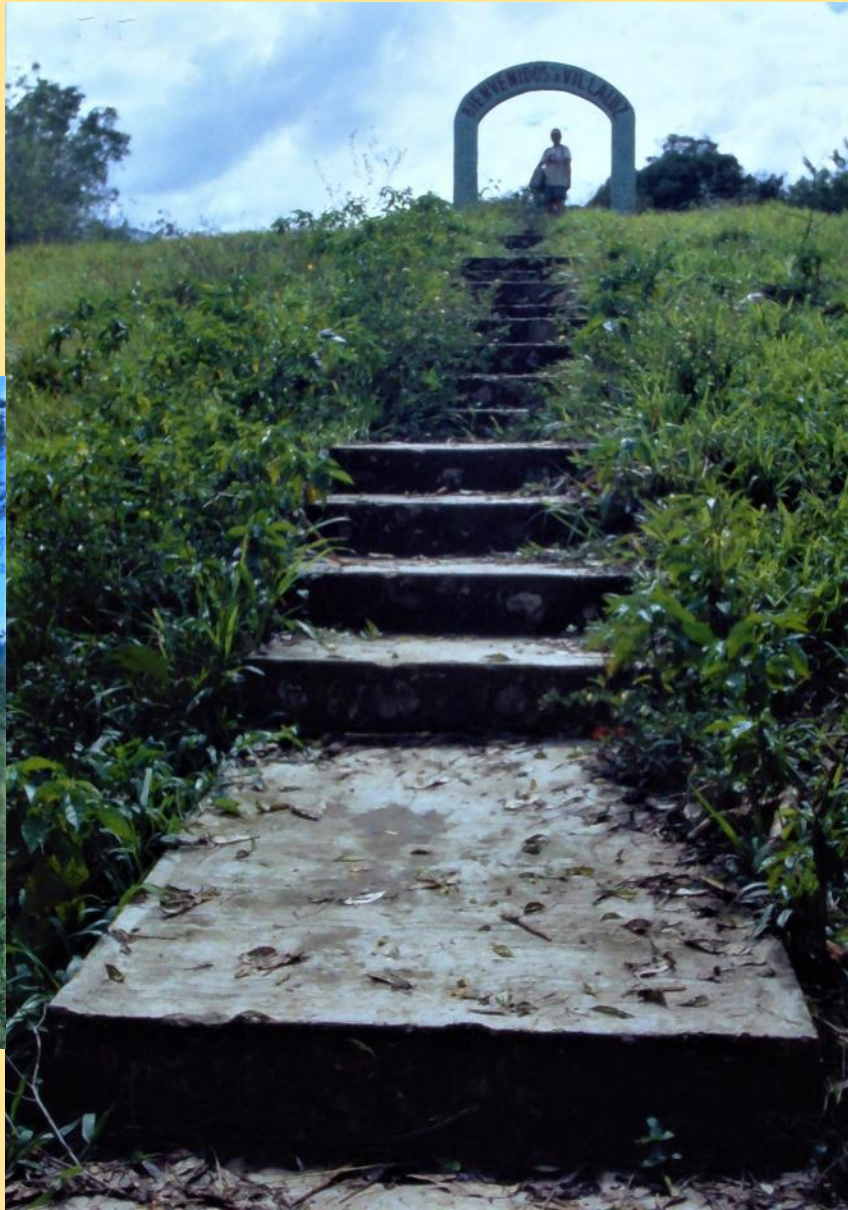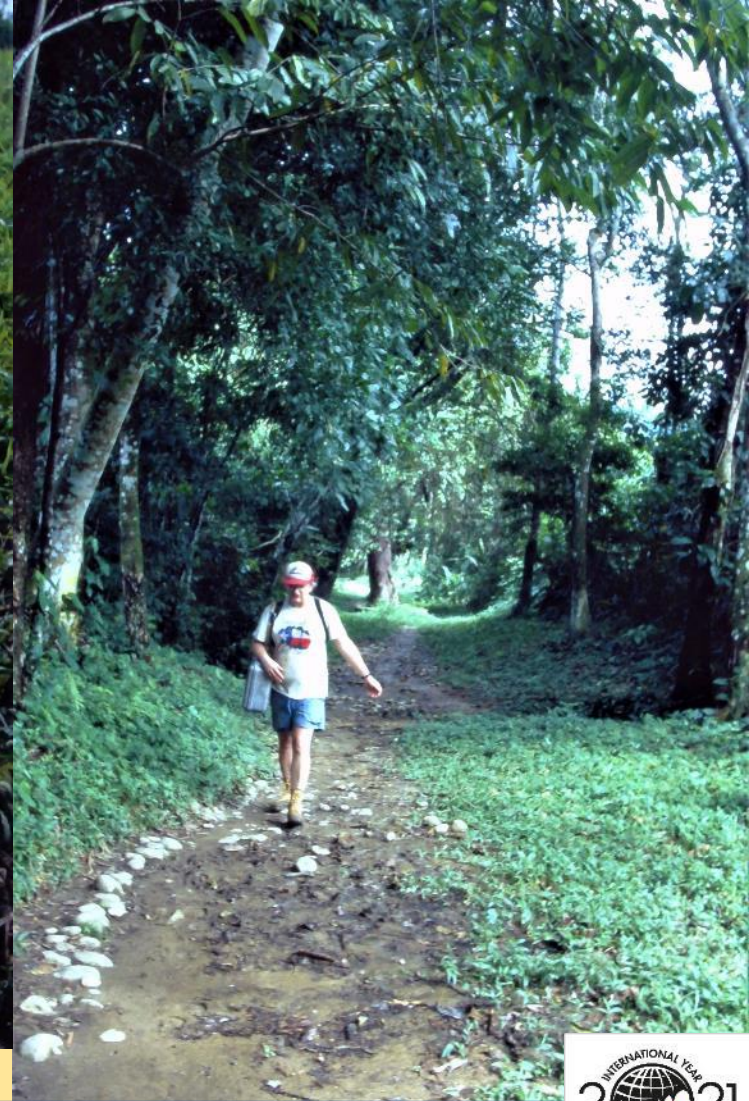

*Hypogenic Caves of the Great Basin: Cueva de Villa Luz*

Sulfur- and gypsum-rich streams along the trail come out of Cueva de Villa Luz and sulfide-rich, surface springs.

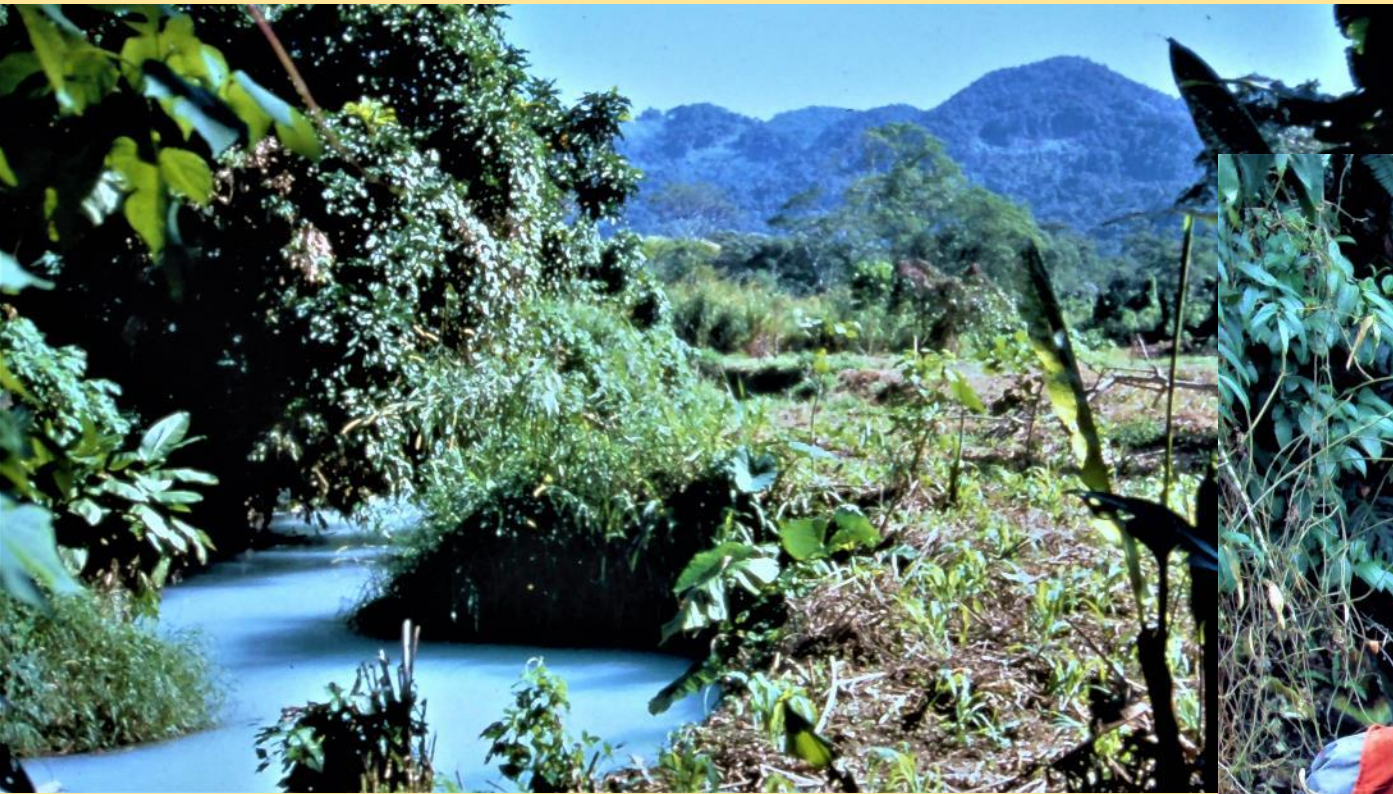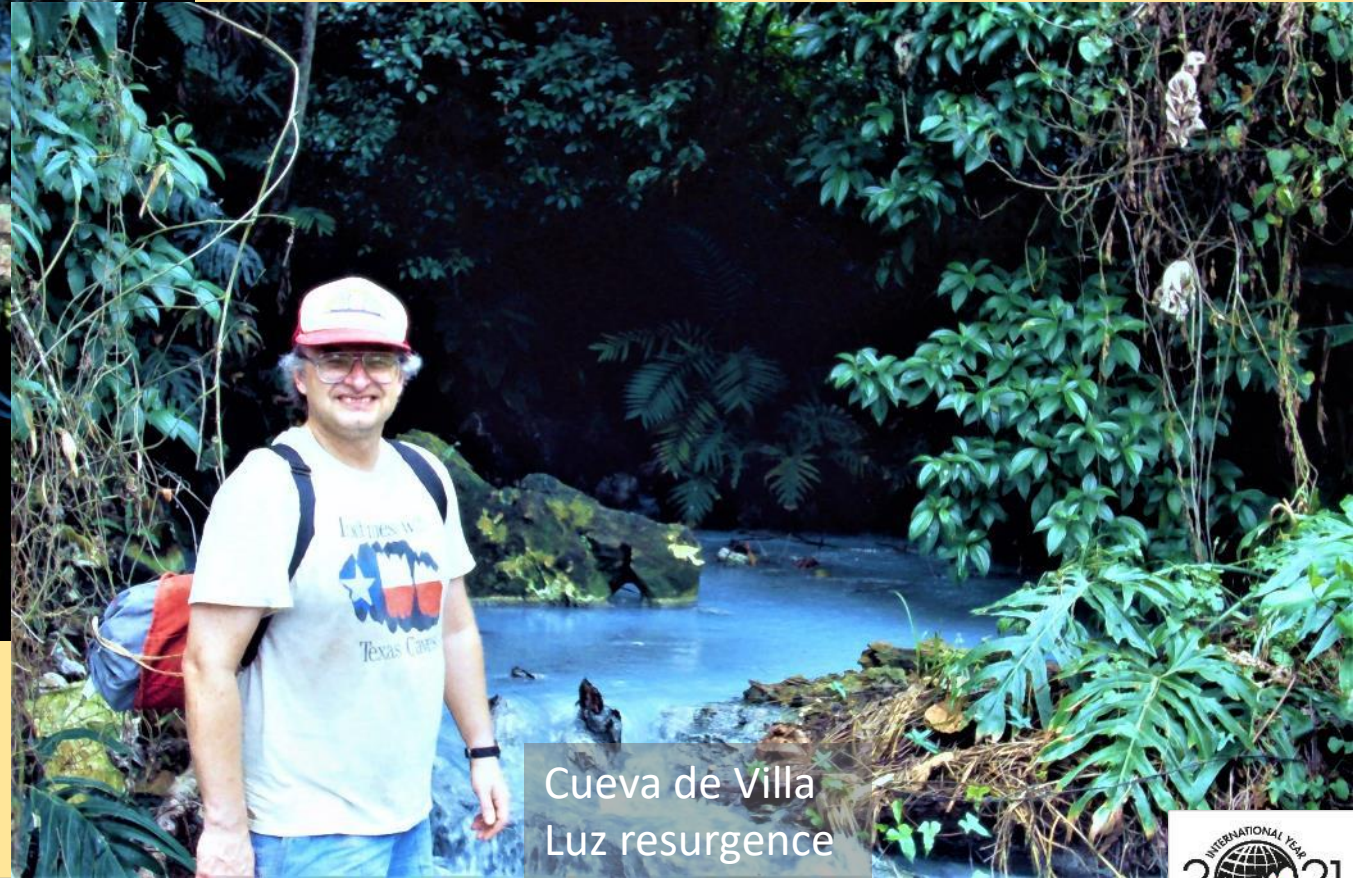

Cueva de Villa  
Luz resurgence

# Stop 1.1

While we appreciate the geologic, hydrologic, and biological importance of the cave, the indigenous people have viewed the cave as a special, spiritual place. The tradition is honored every Palm Sunday with hundreds of participants.

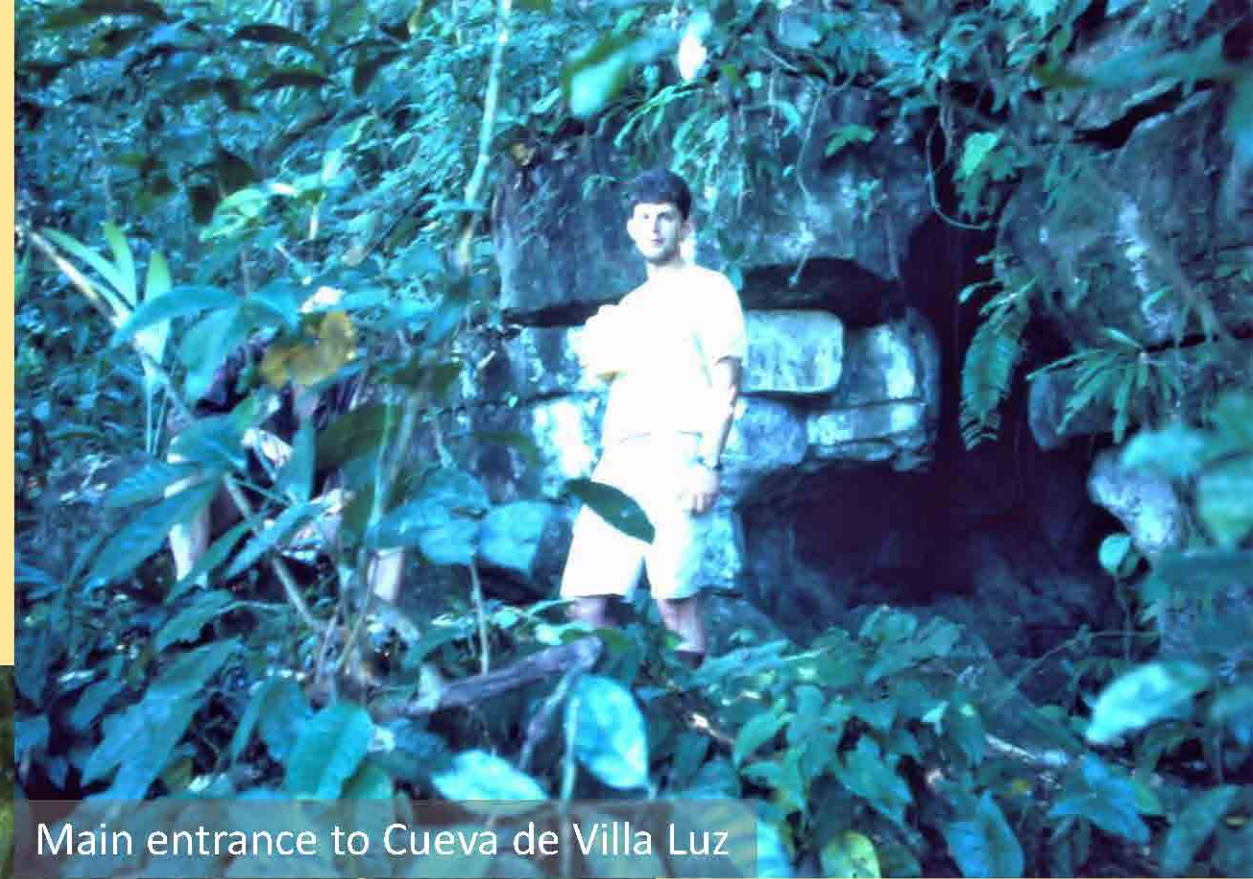

Main entrance to Cueva de Villa Luz

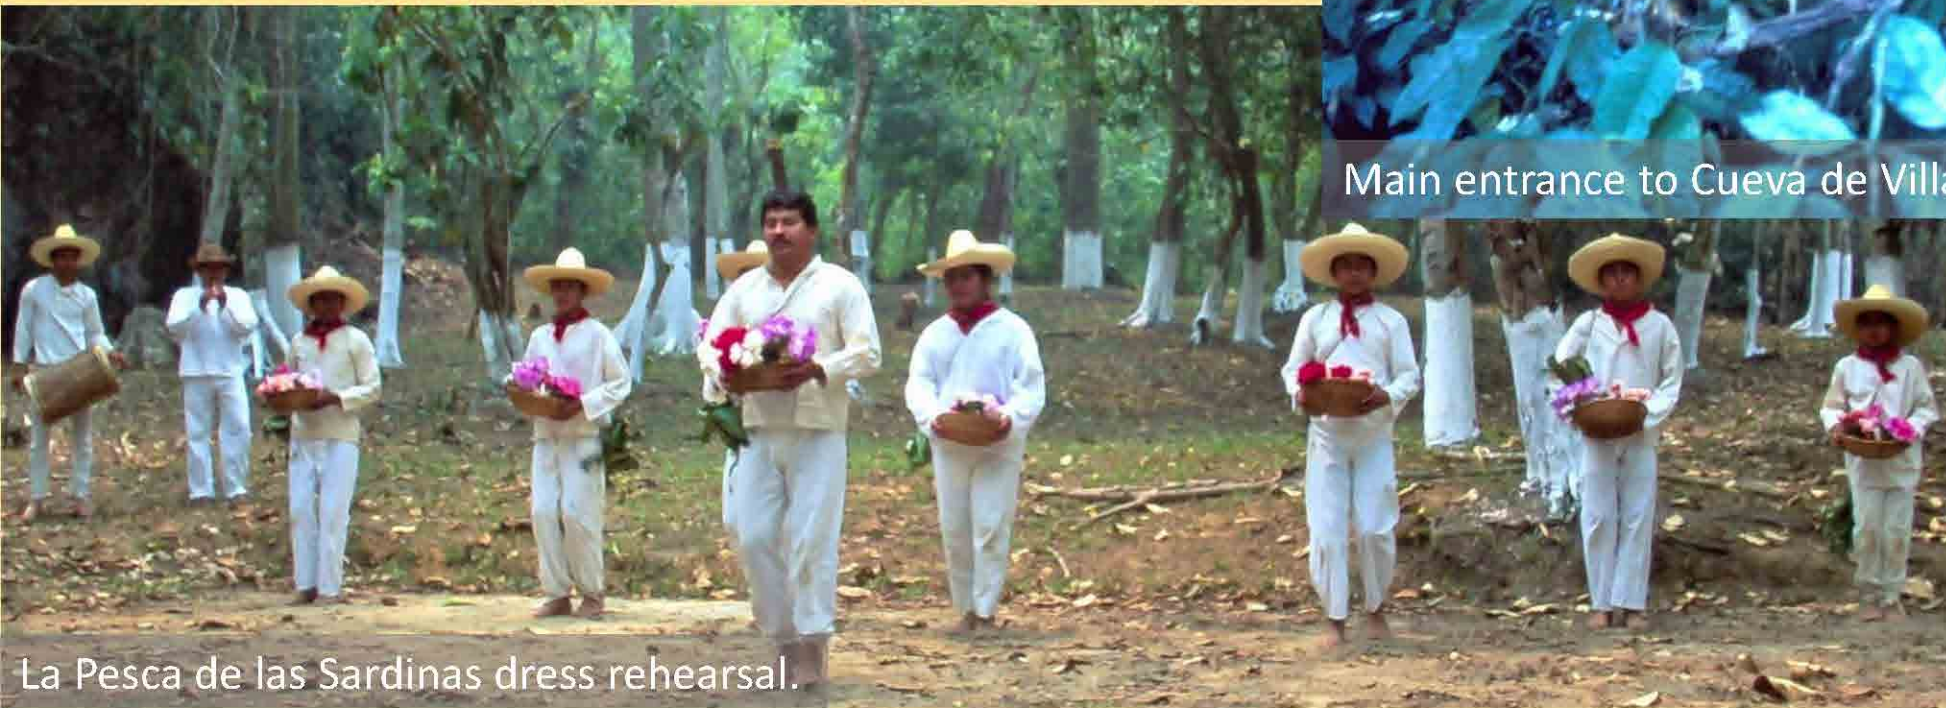

La Pesca de las Sardinas dress rehearsal.

# Stop 1.1

## CUEVA DE VILLA LUZ

Tabasco, Mexico

COMPASS and TAPE SURVEY By:

Jim Piszewicz, Louise Hise, Kelly Malhotra, Abby Wines, Noel Daniels,  
Chris Long, Dave Lester, Chuck Porter, Bob Adair, Fred Loizzer,  
Aida Del Porto, Mike Taylor, Carl Allen, Ricki Shelton, Alan Grassier,  
Steve Alvarez, Doug Soroka, Lynn Kleina and Bob Richards

SURVEYED DATES: January 1997, January & April 1998, January & August 2000

CARTOGRAPHY BY: Bob Richards and Louise Hise

CAVE LENGTH: 1,987 meters  
CAVE DEPTH: 23 meters

Plan and profile view is projected 40 degrees from true north.

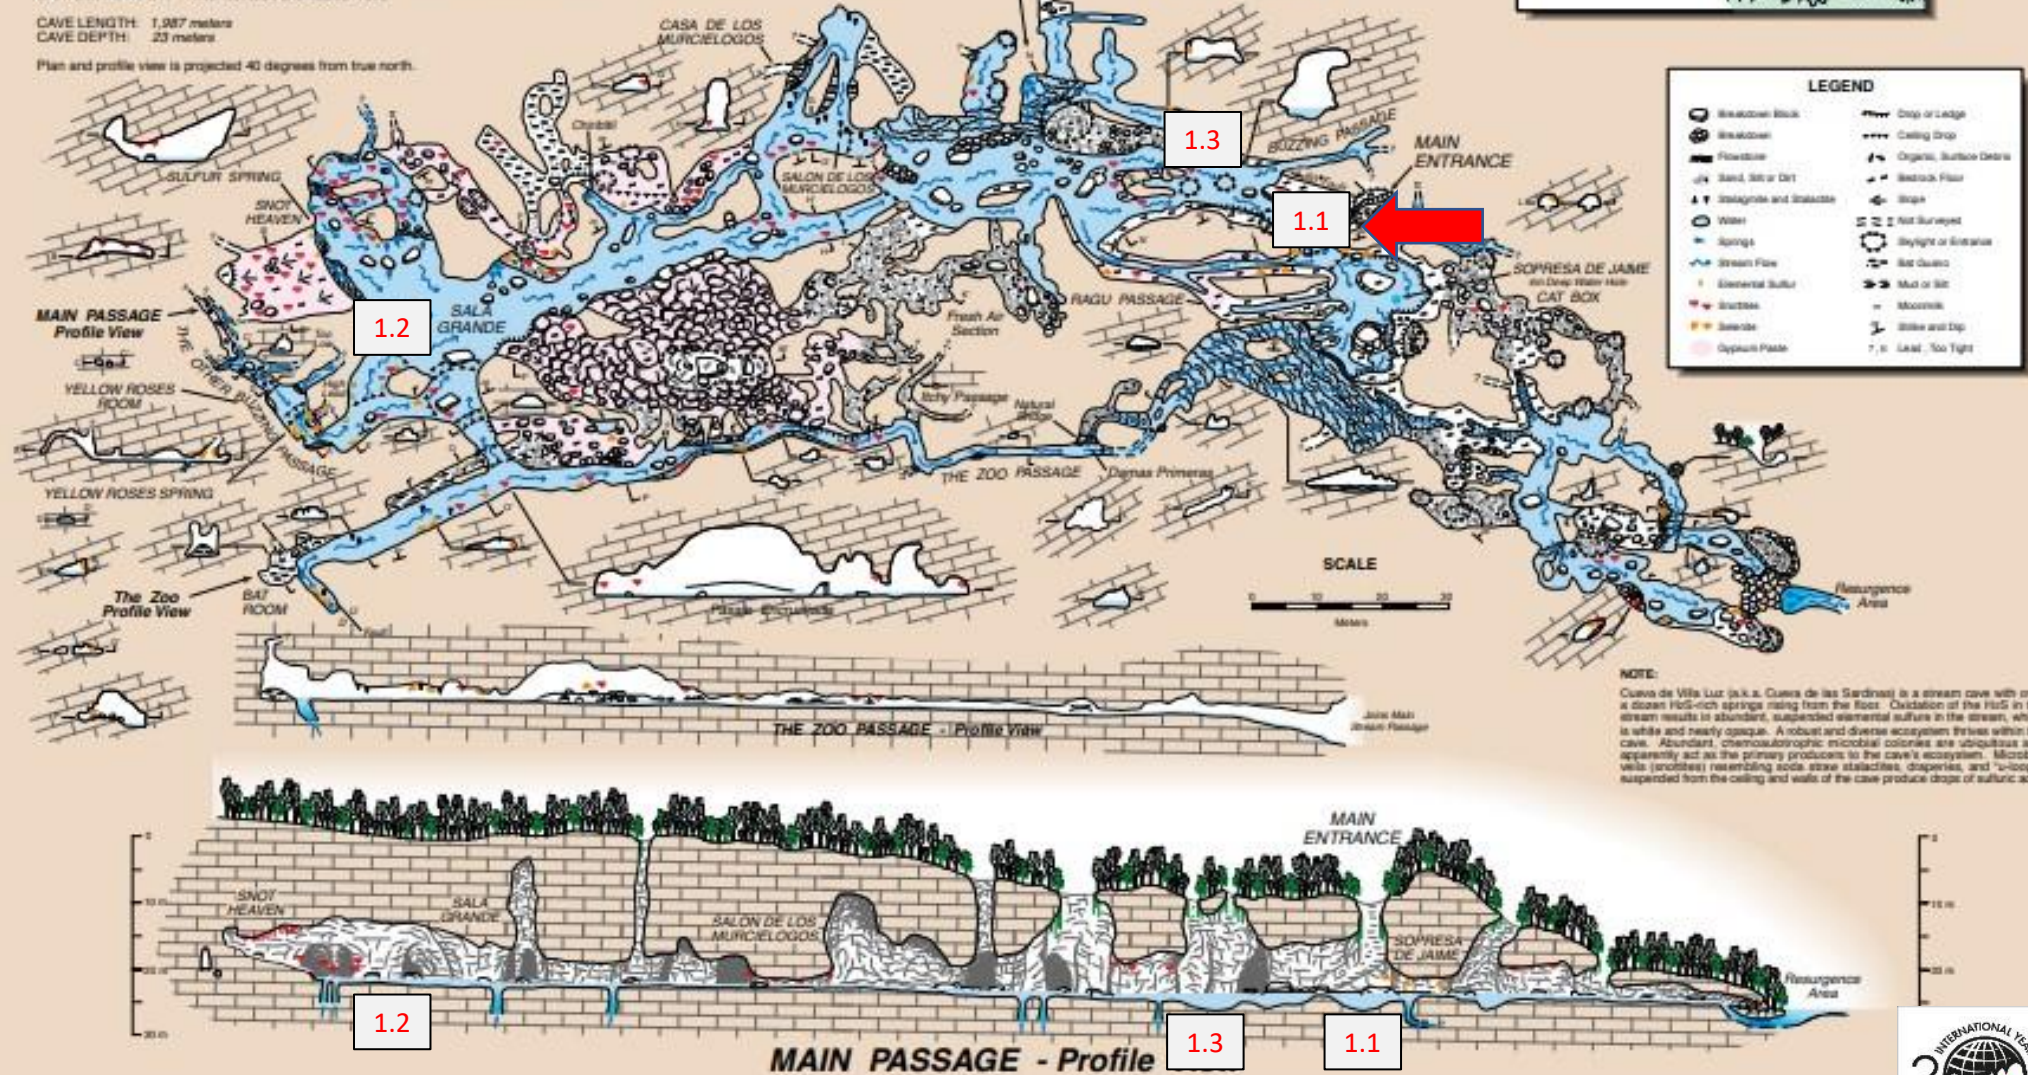

# Stop 1.1

- $\text{H}_2\text{S}$  at well-ventilated entrance is typically less than 10 ppm.
- Further in the cave, levels can peak  $>210$  ppm.
- Occasionally,  $\text{CO}_2$  can exceed 3%,  $\text{O}_2$  has dropped to below 16%, and outgassing of CO.
- The opaque water and sharp rocks easily cut shins.

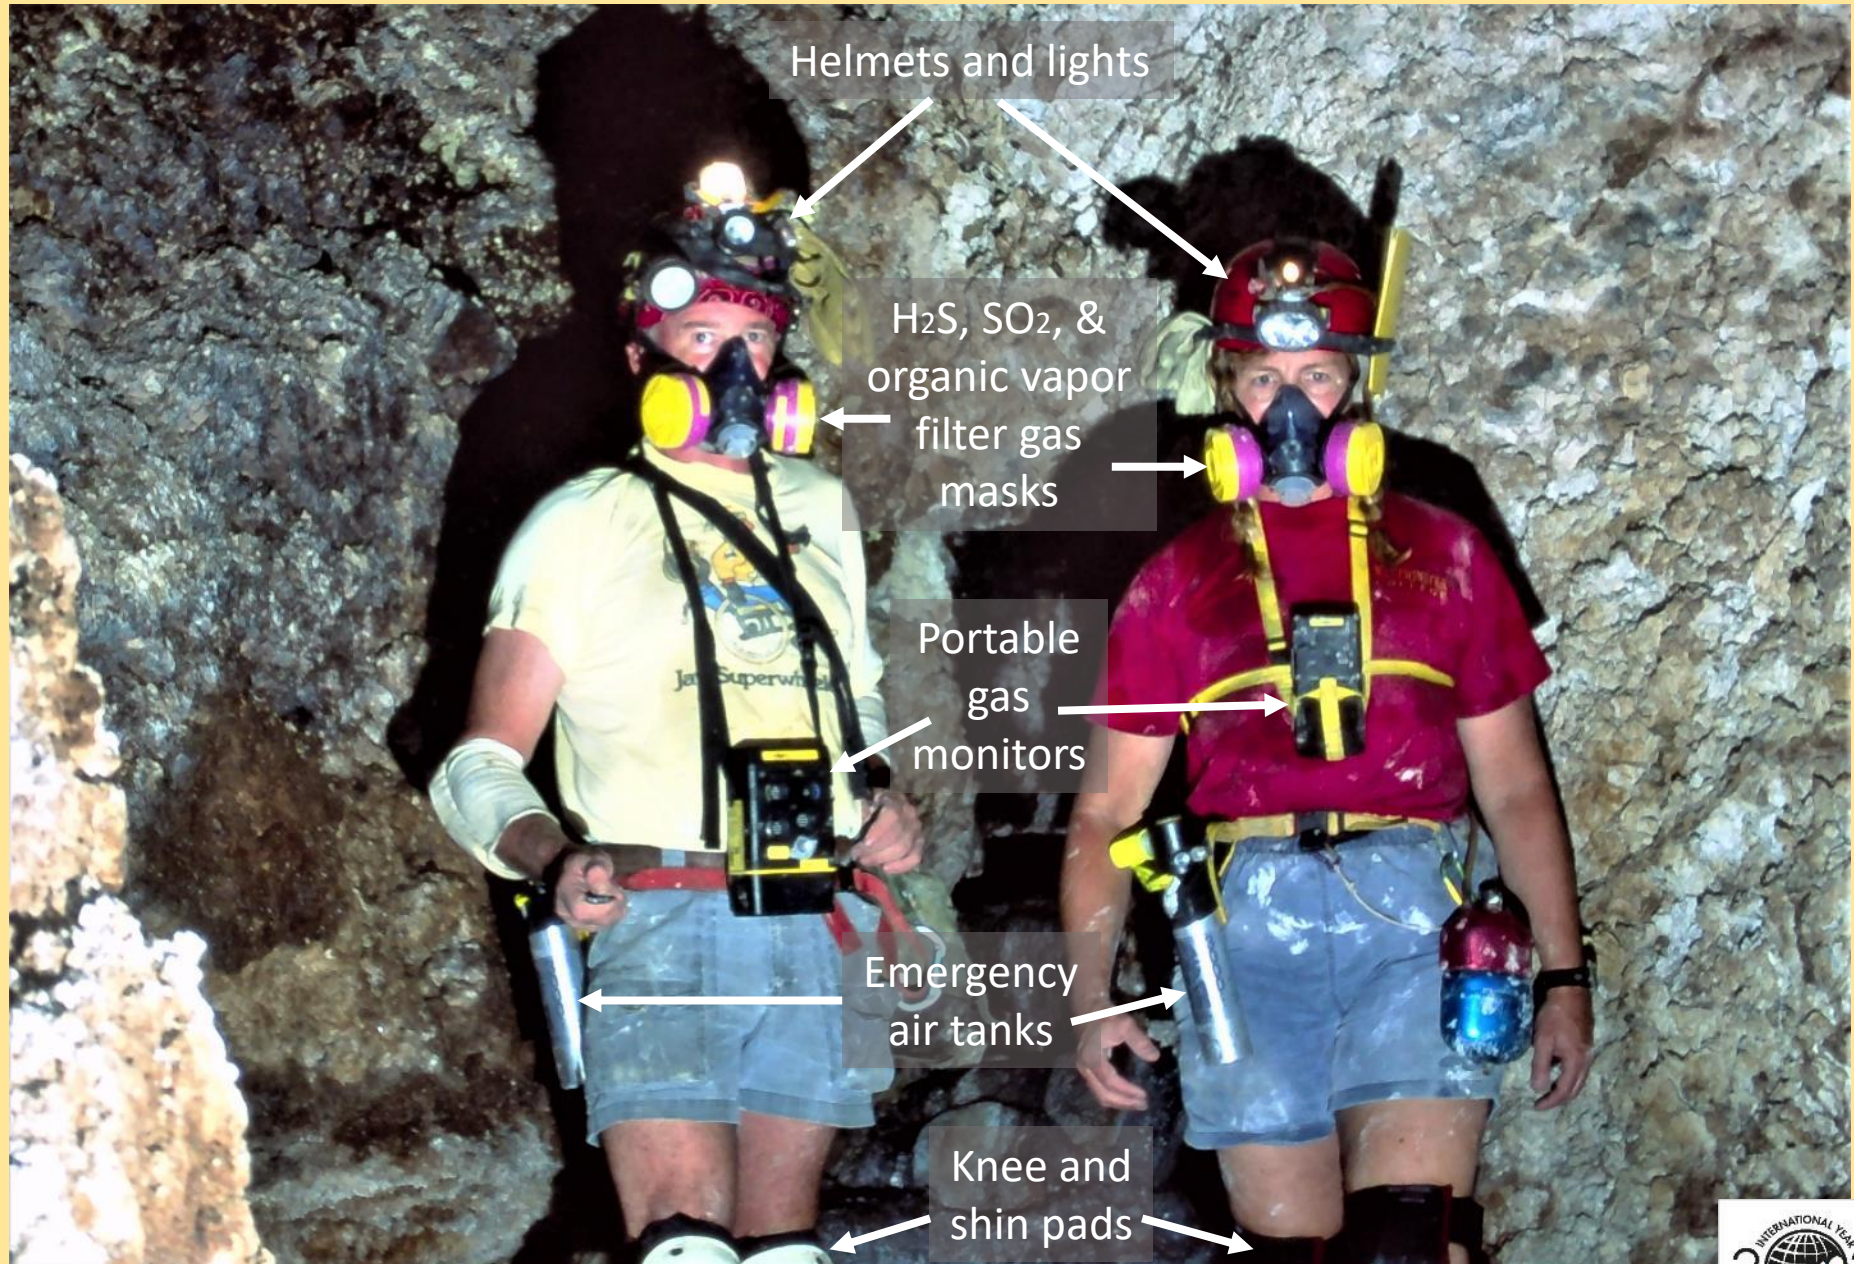

*Hypogenic Caves of the Great Basin: Cueva de Villa Luz*

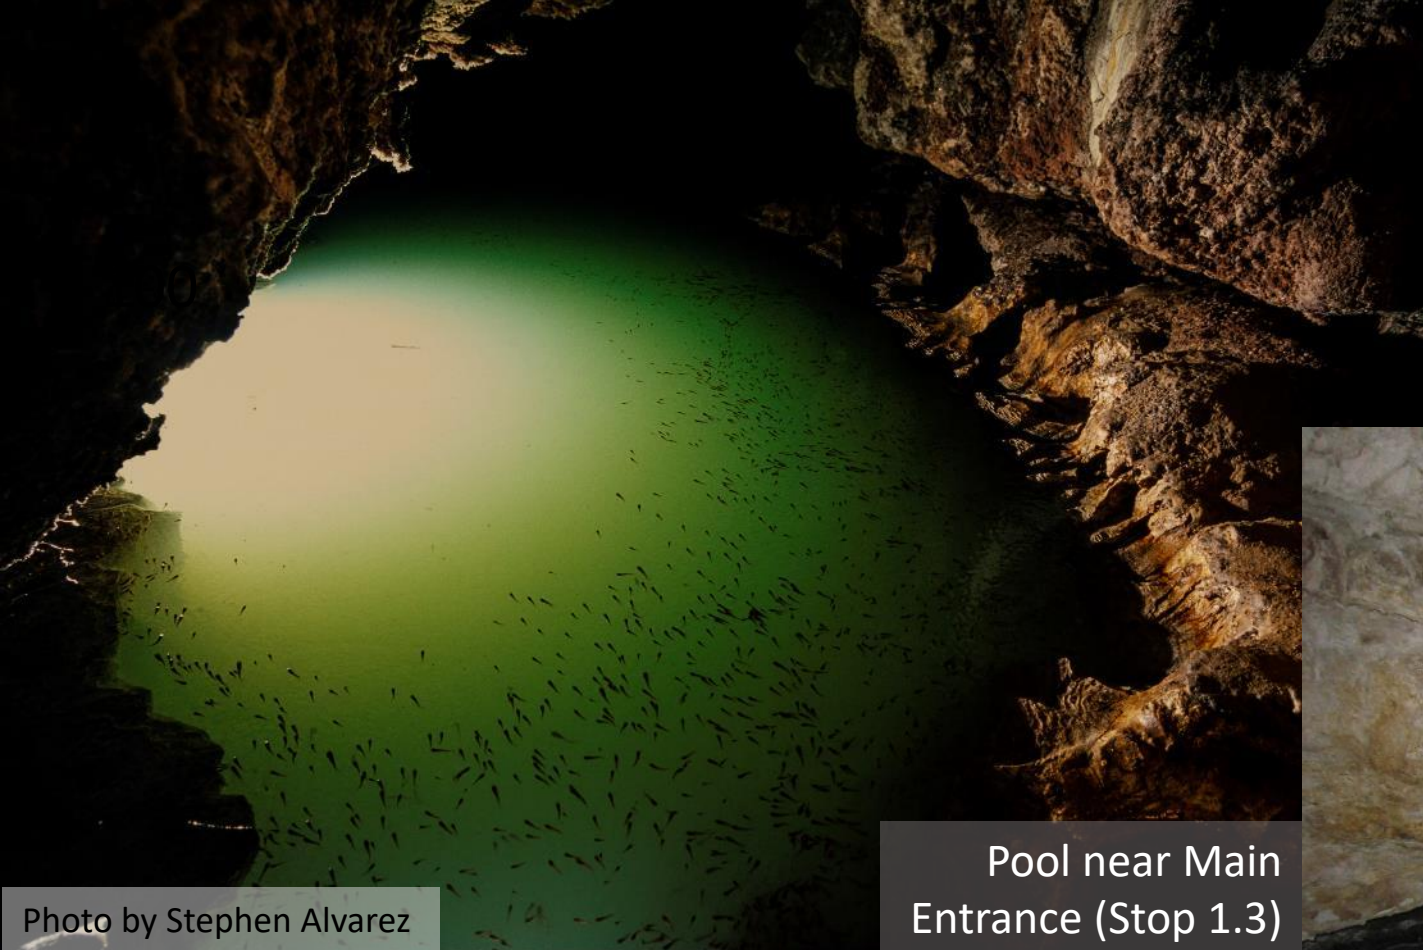

Photo by Stephen Alvarez

Pool near Main  
Entrance (Stop 1.3)

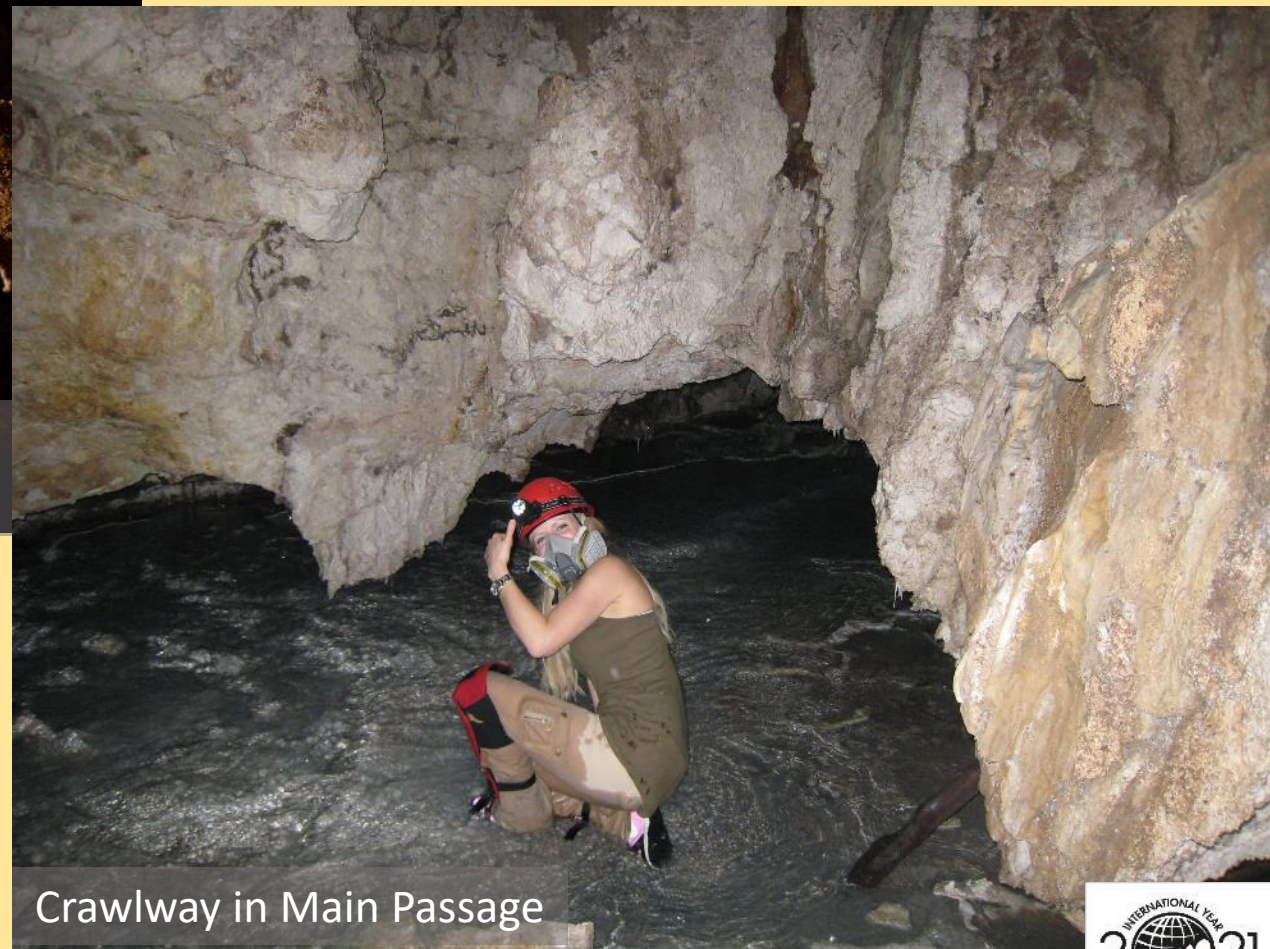

Crawlway in Main Passage

*Hypogenic Caves of the Great Basin: Cueva de Villa Luz*

Main passage forms along a minor fault.

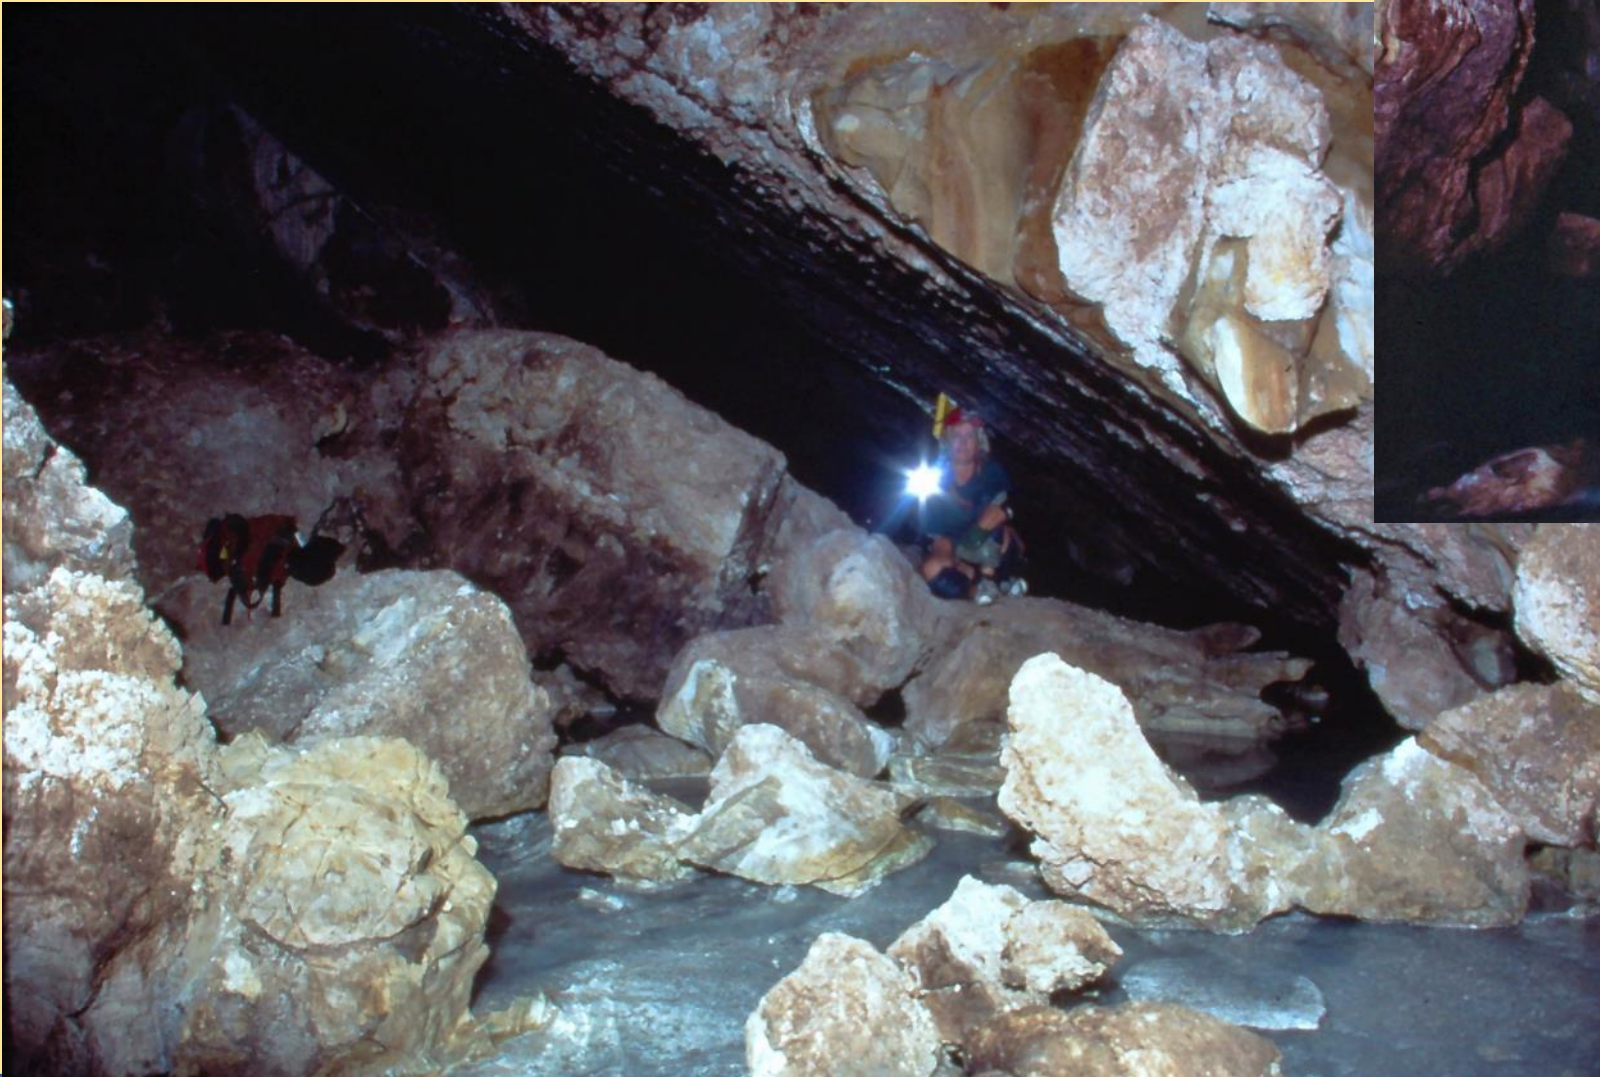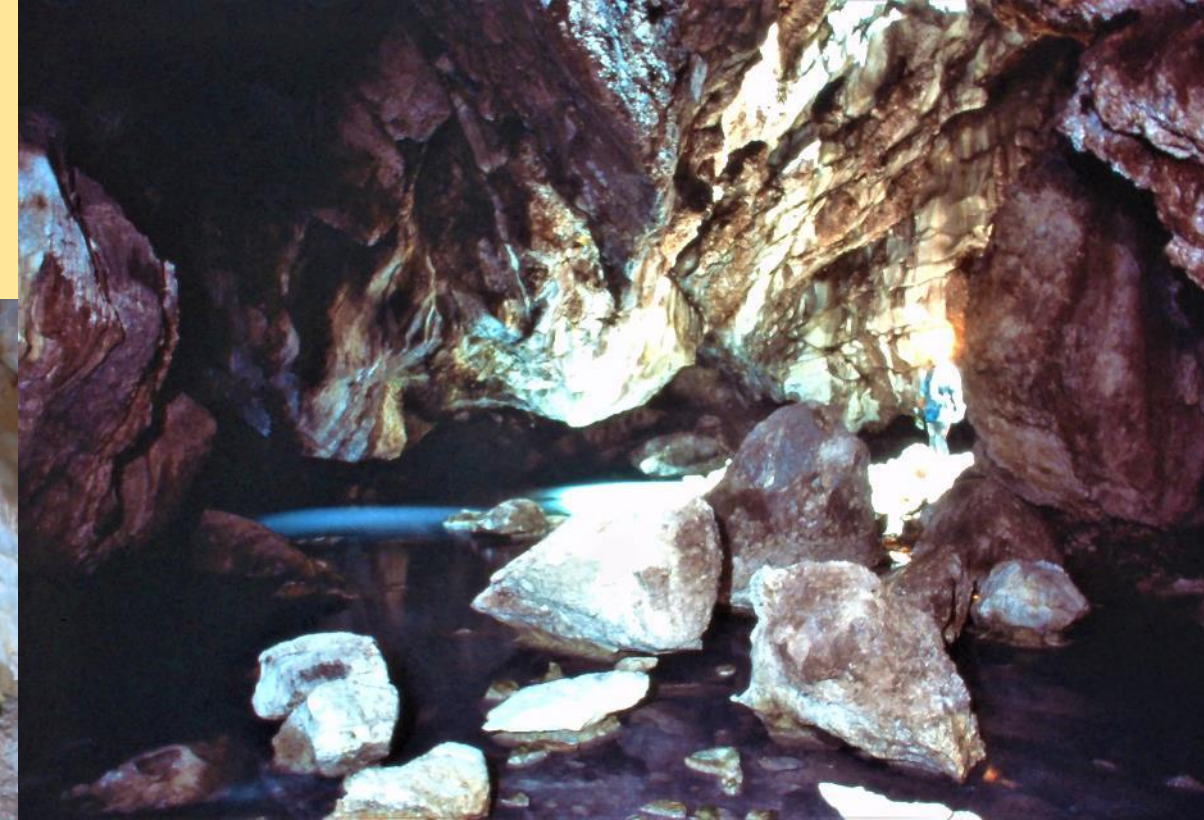

The cave has a couple of dozen skylights.

- Helps keep the  $\text{H}_2\text{S}$  and other toxic gases low
- Complicates the complex ecosystem

# Stop 1.2

In the large Sala Grande, the lack of skylights and abundance of subterranean springs increases the risk of toxic air and the concentration of bizarre lifeforms.

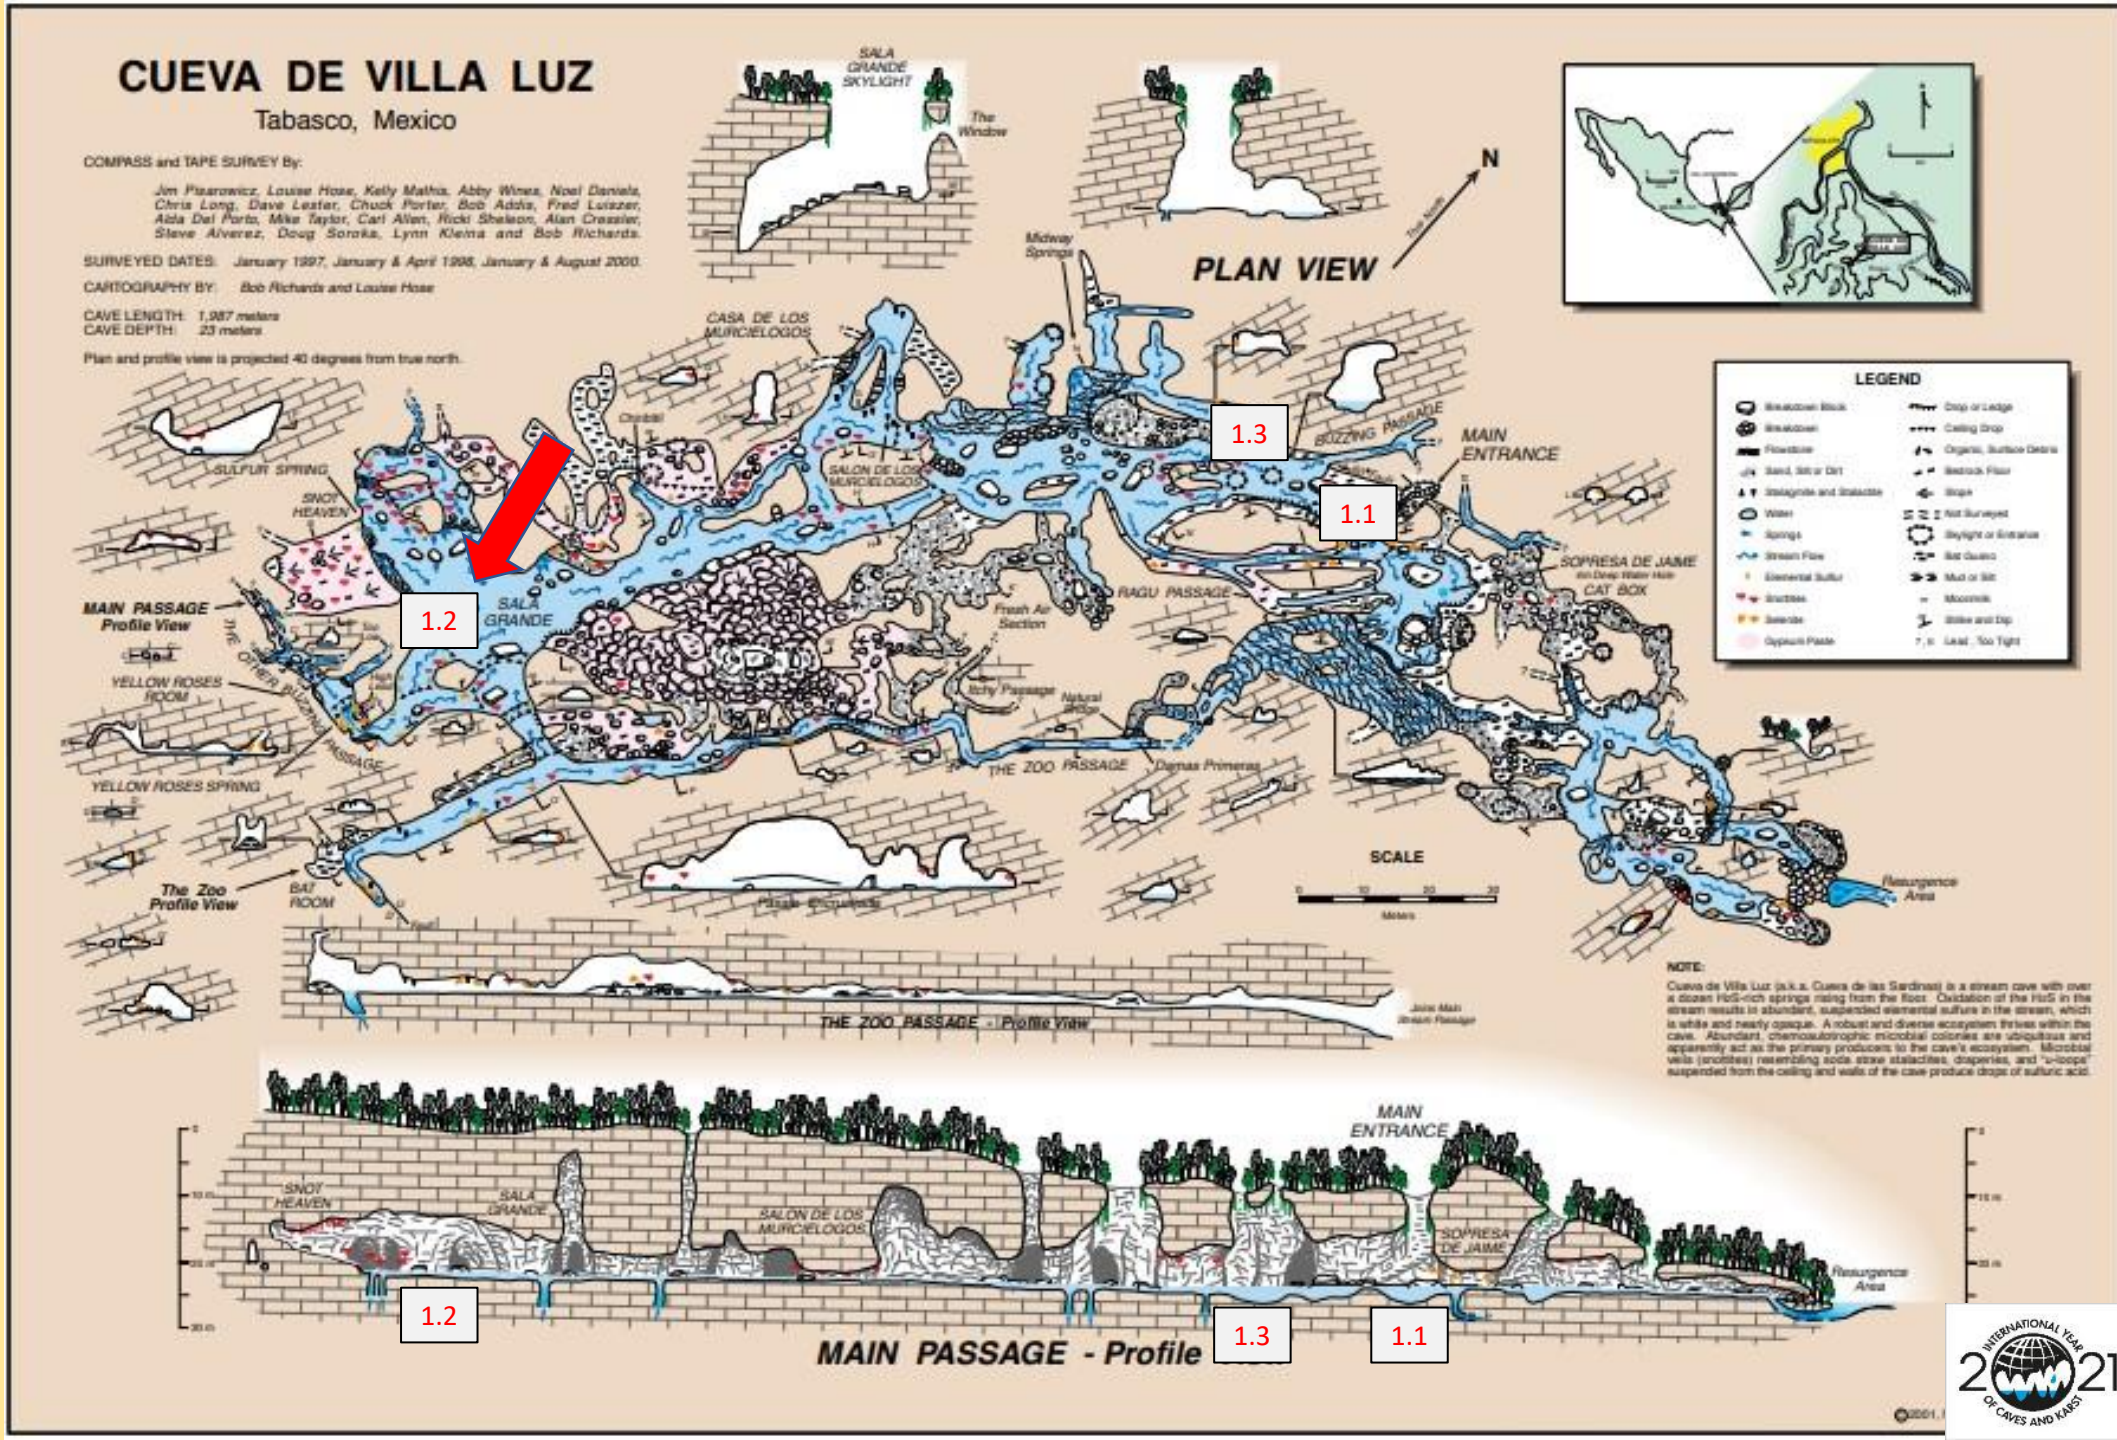

# Stop 1.2

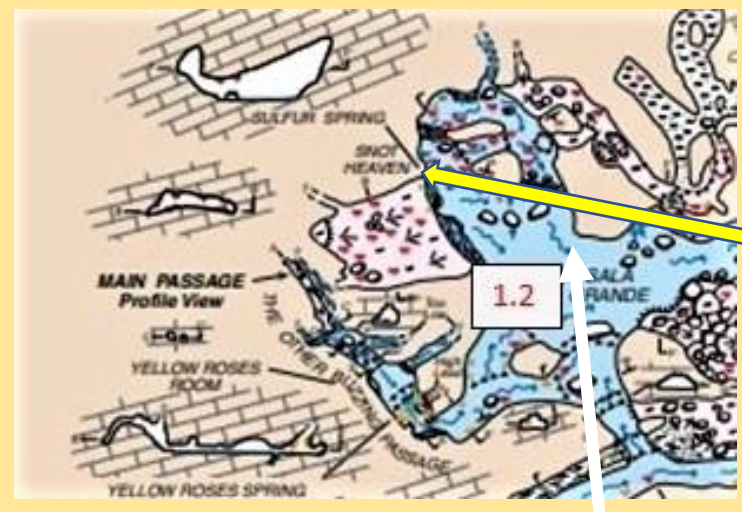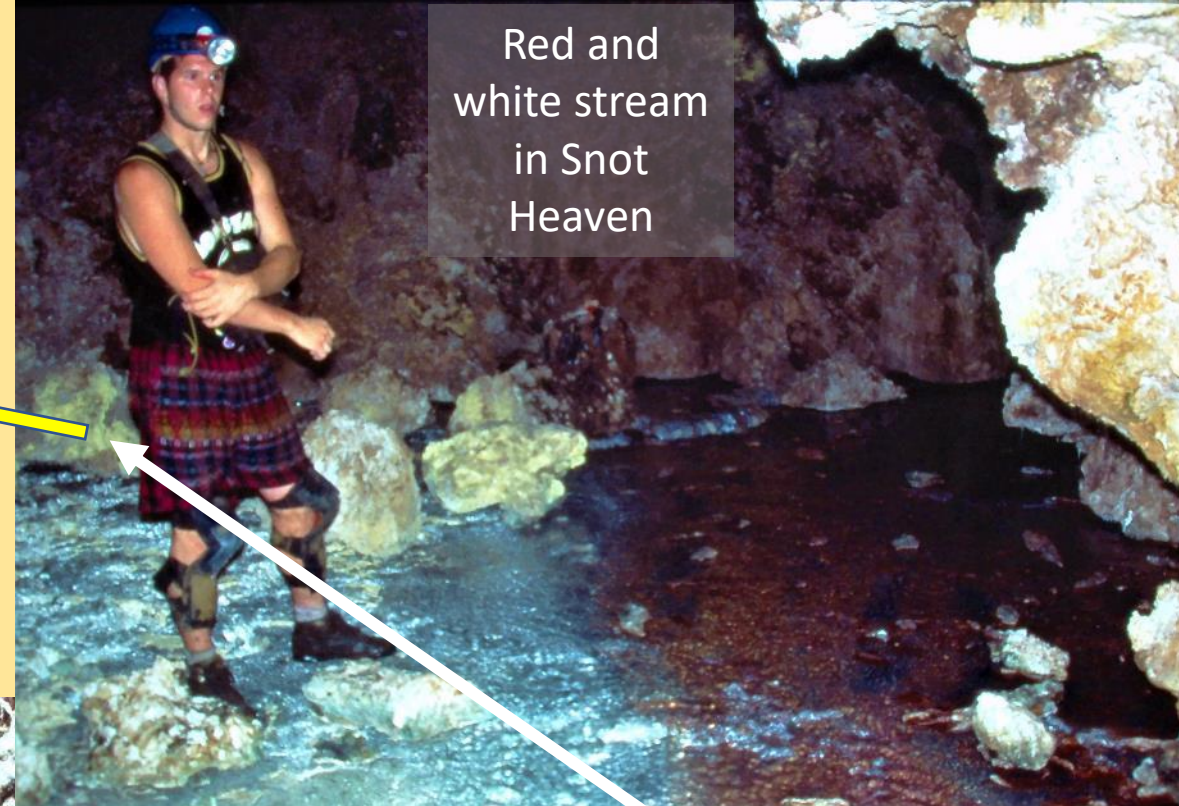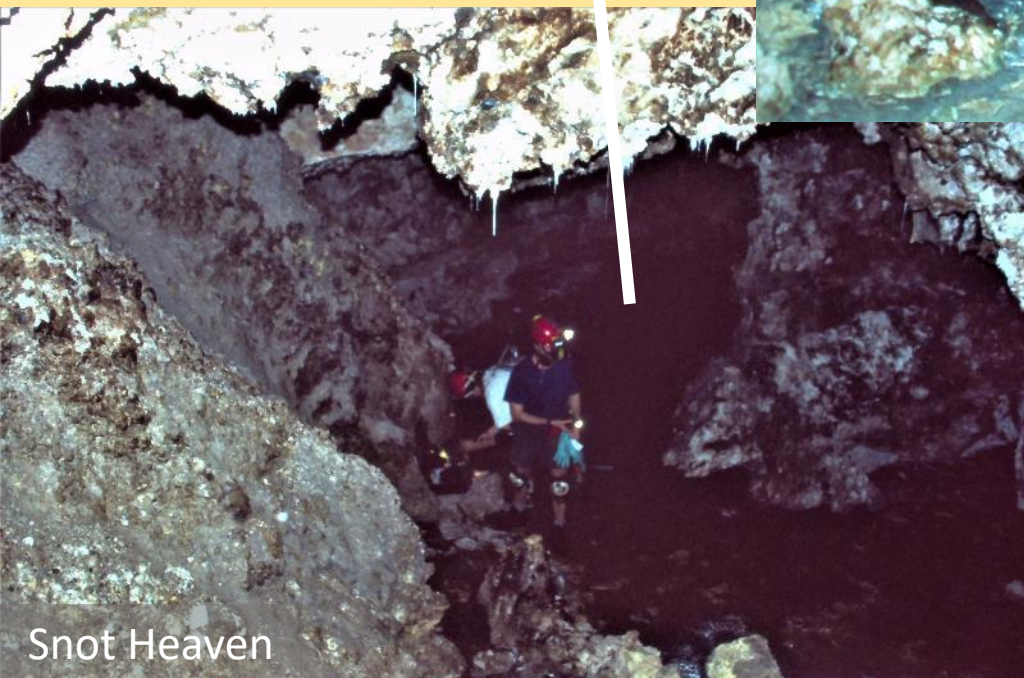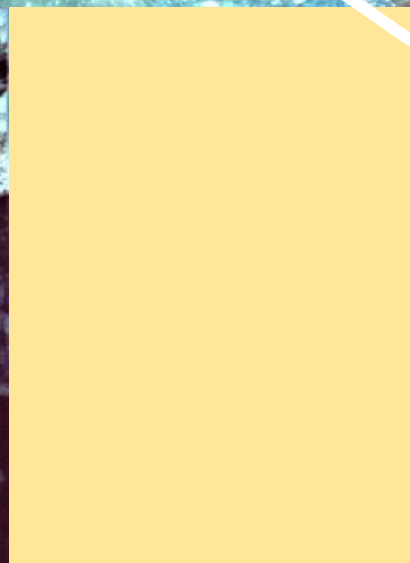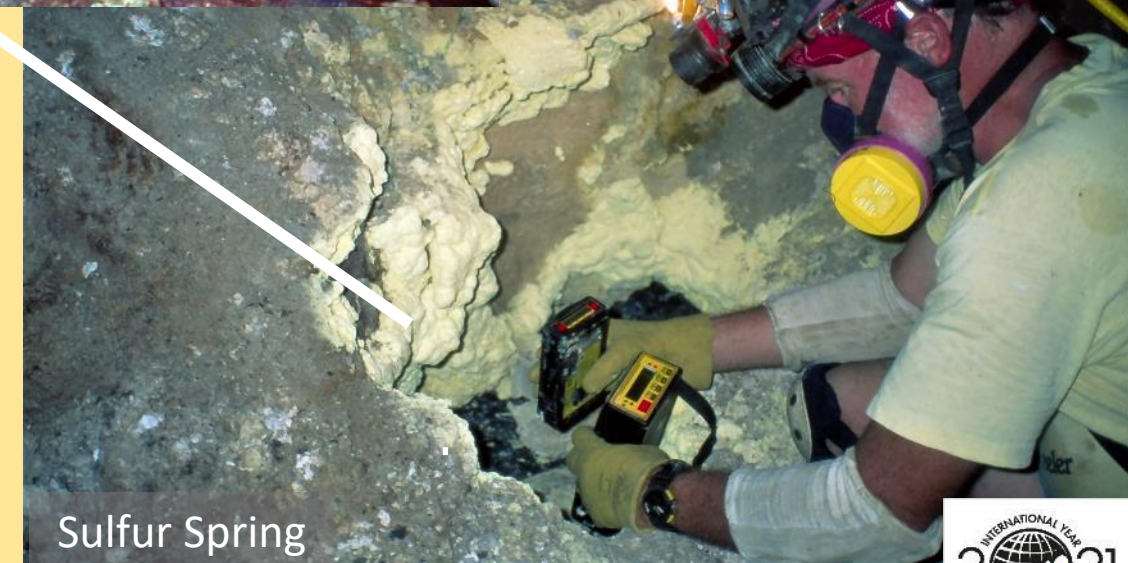

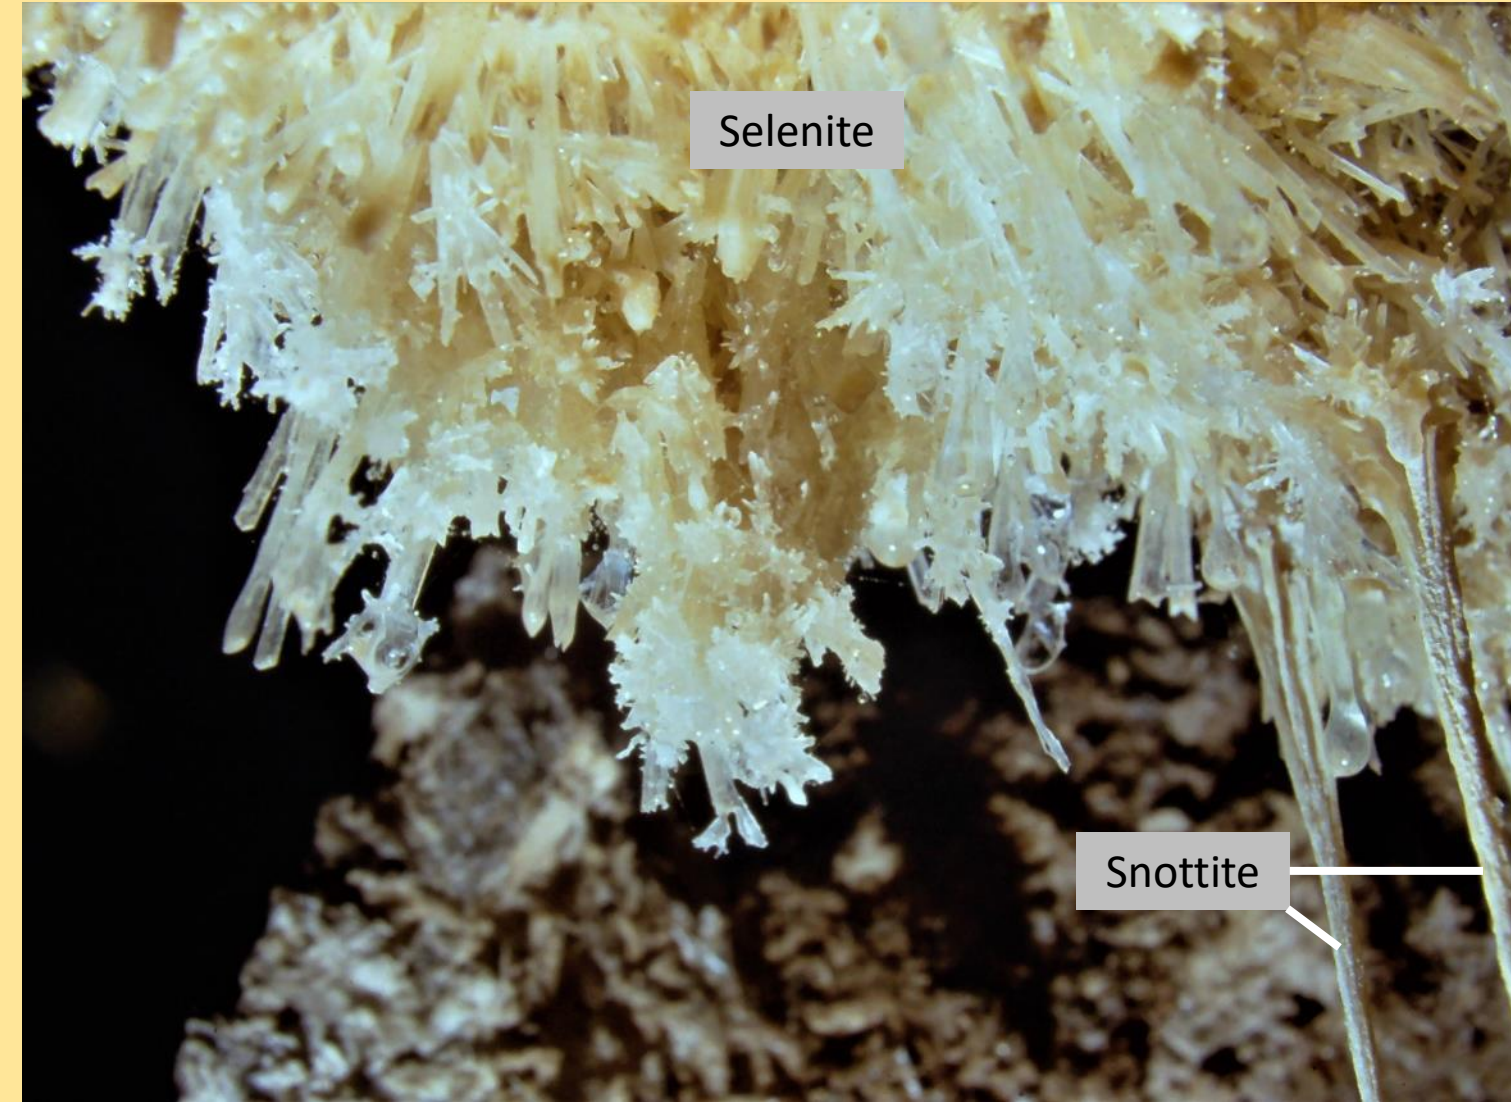

- Snottites produce and drip sulfuric acid (pH 0-3).
- They are rooted on gypsum to insulate the limestone bedrock.

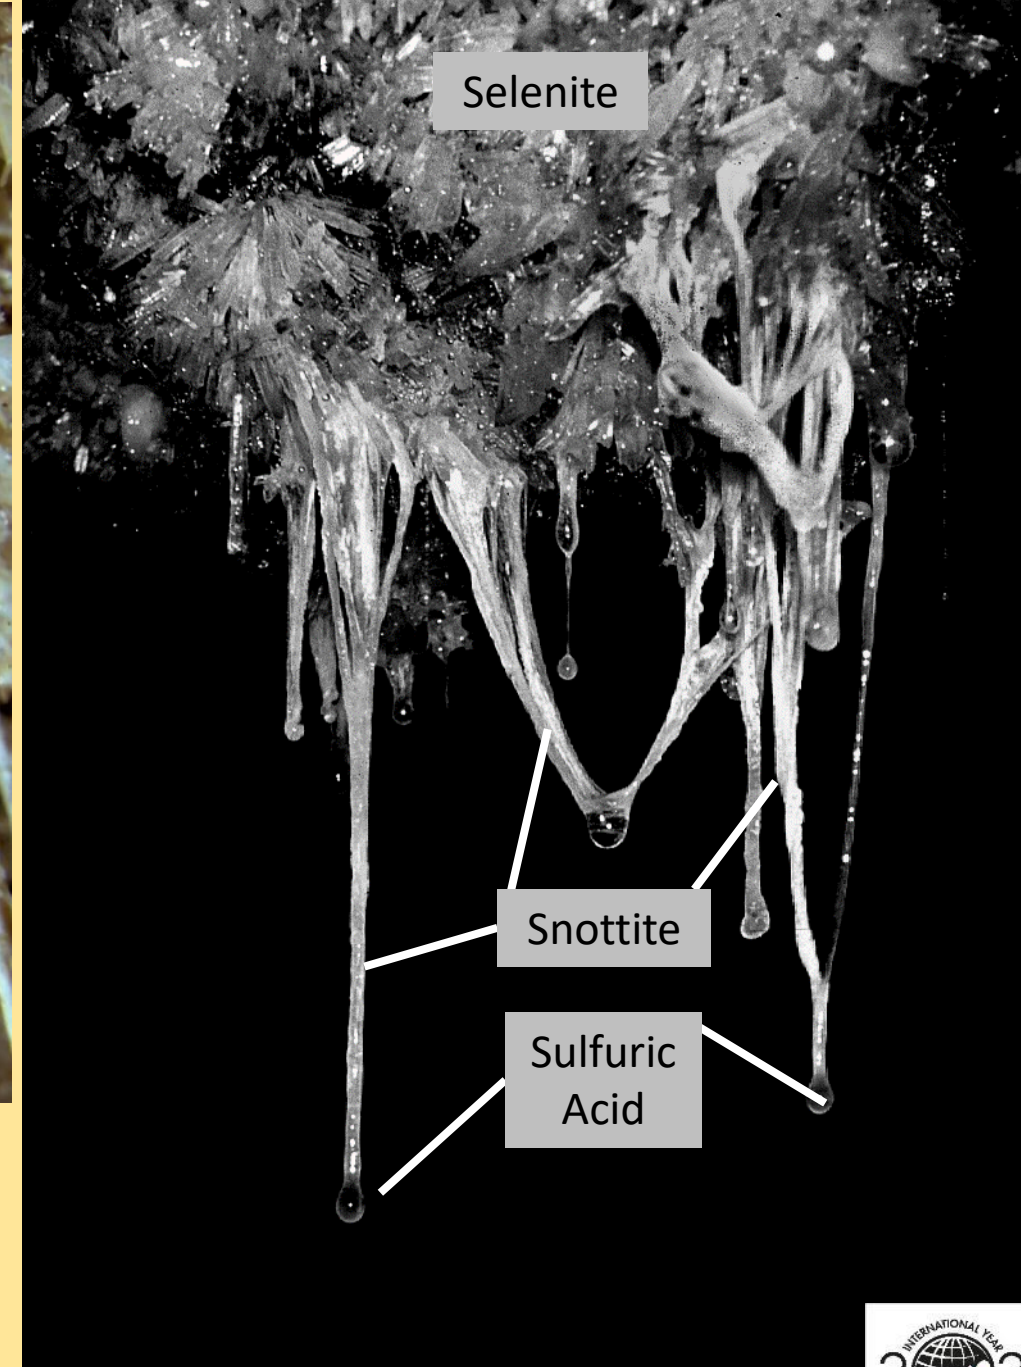

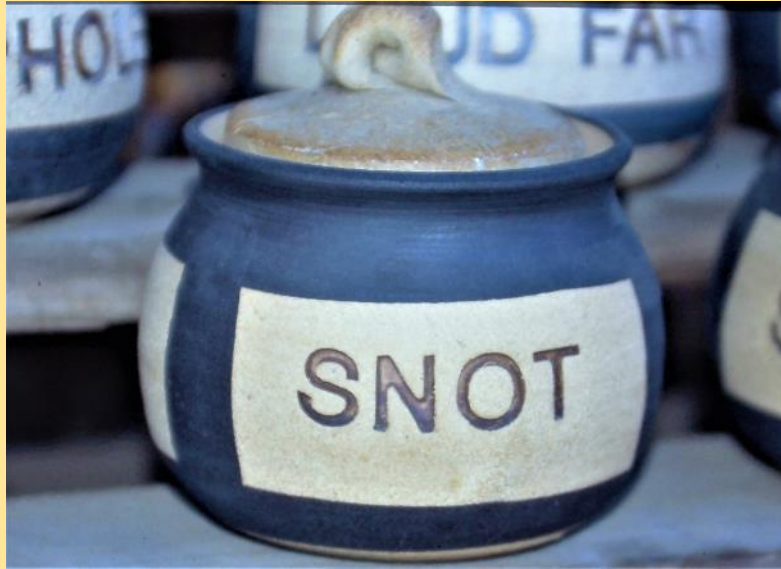

Snottites are colonies of sulfur-oxidizing and other bacteria as well as invertebrates that presumably graze on the snottites.

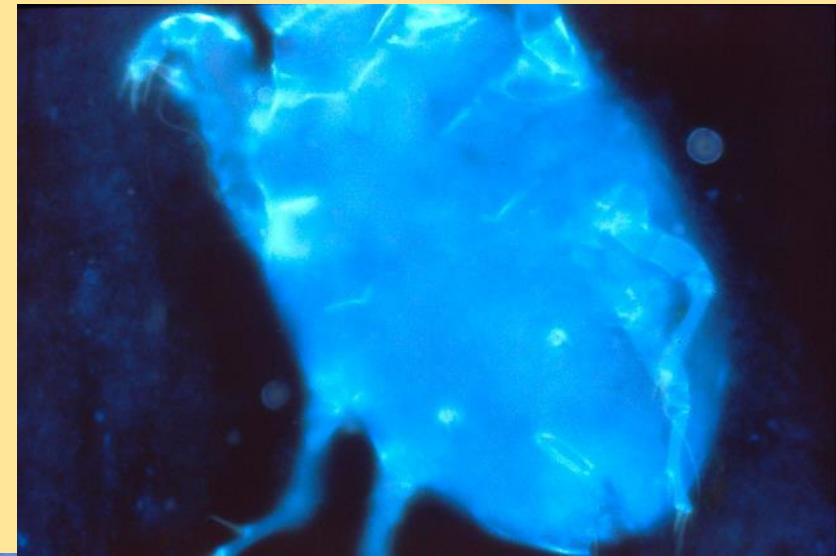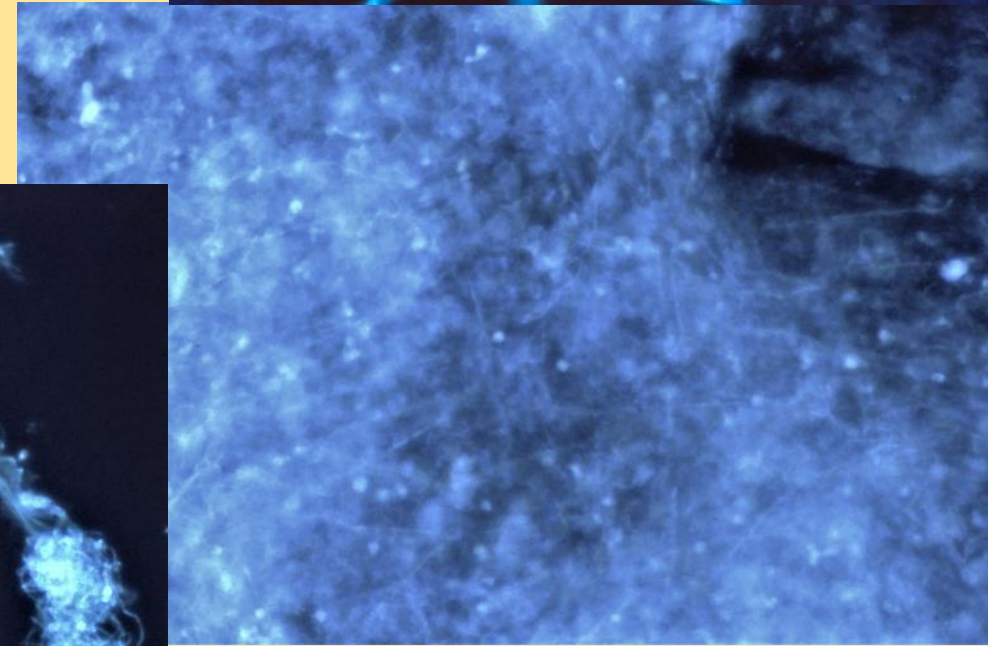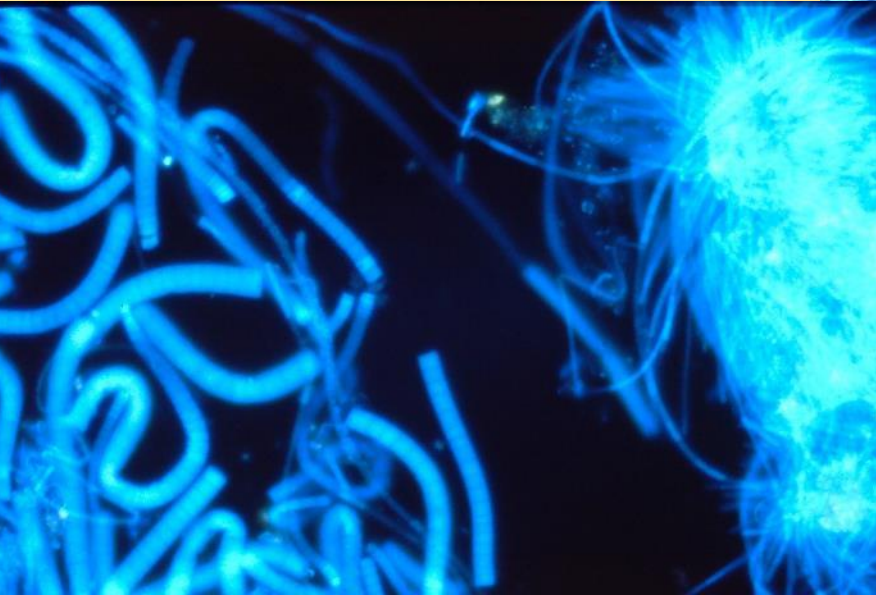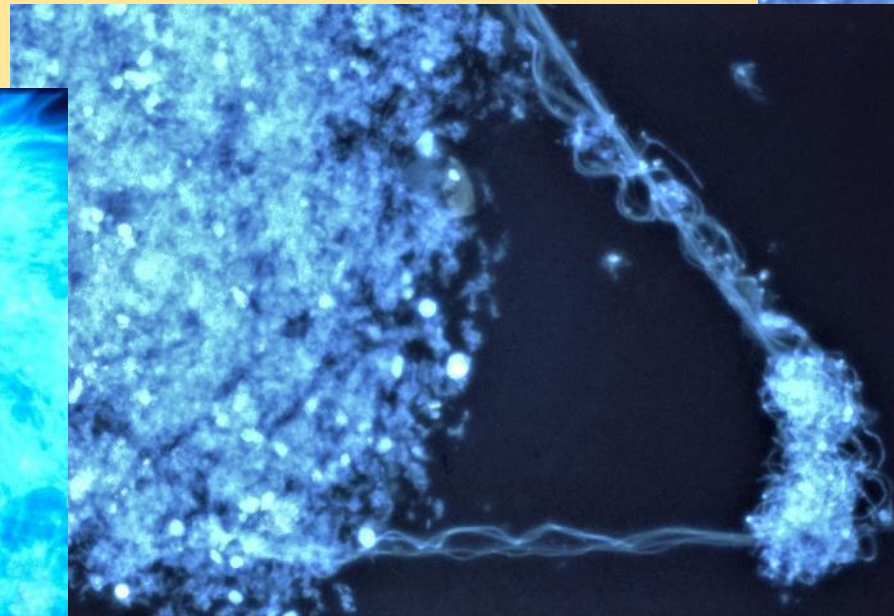

Gypsum paste

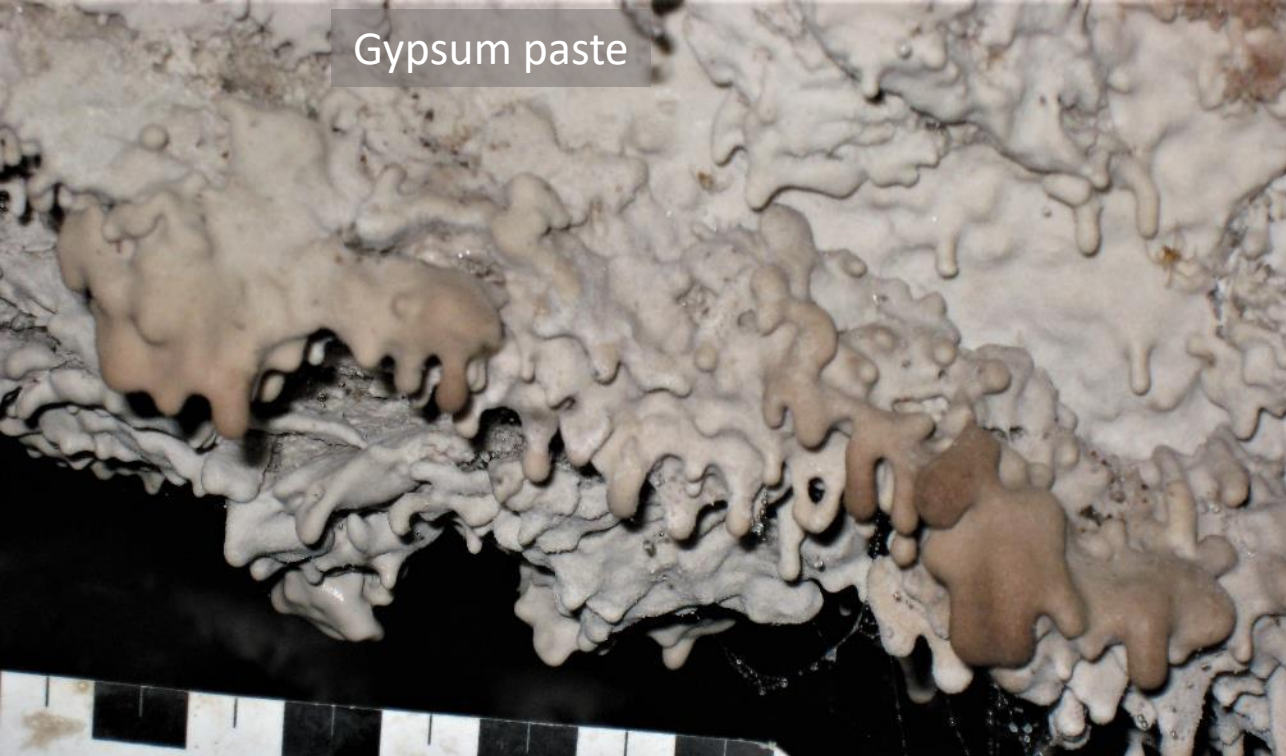

Warm water vapors in the cave air condense on the cooler walls. Water absorbs the  $\text{H}_2\text{S}$  gases and  $\text{O}_2$  to form  $\text{H}_2\text{SO}_4$ . Bacteria facilitate. Acid plus calcite form gypsum.

Selenite

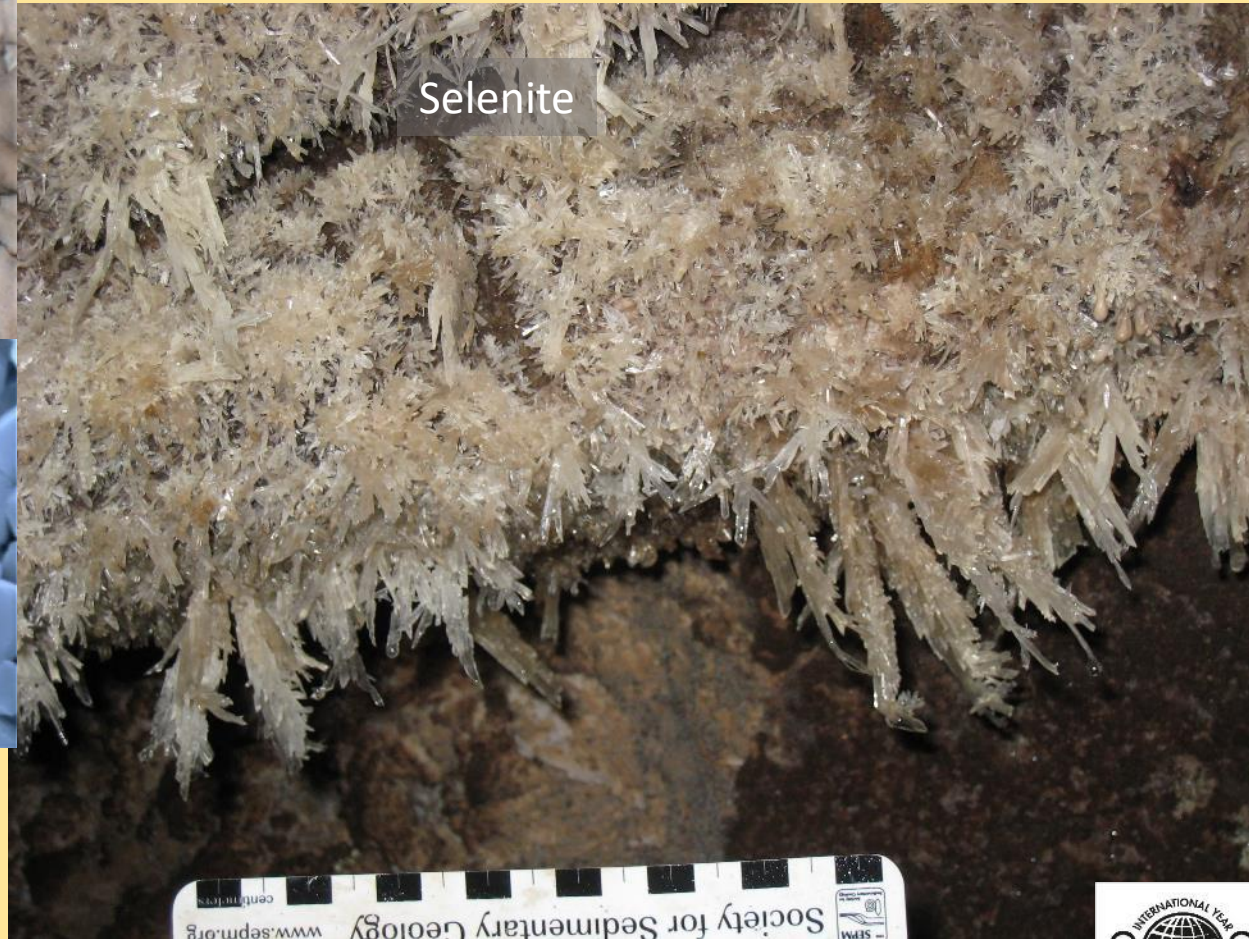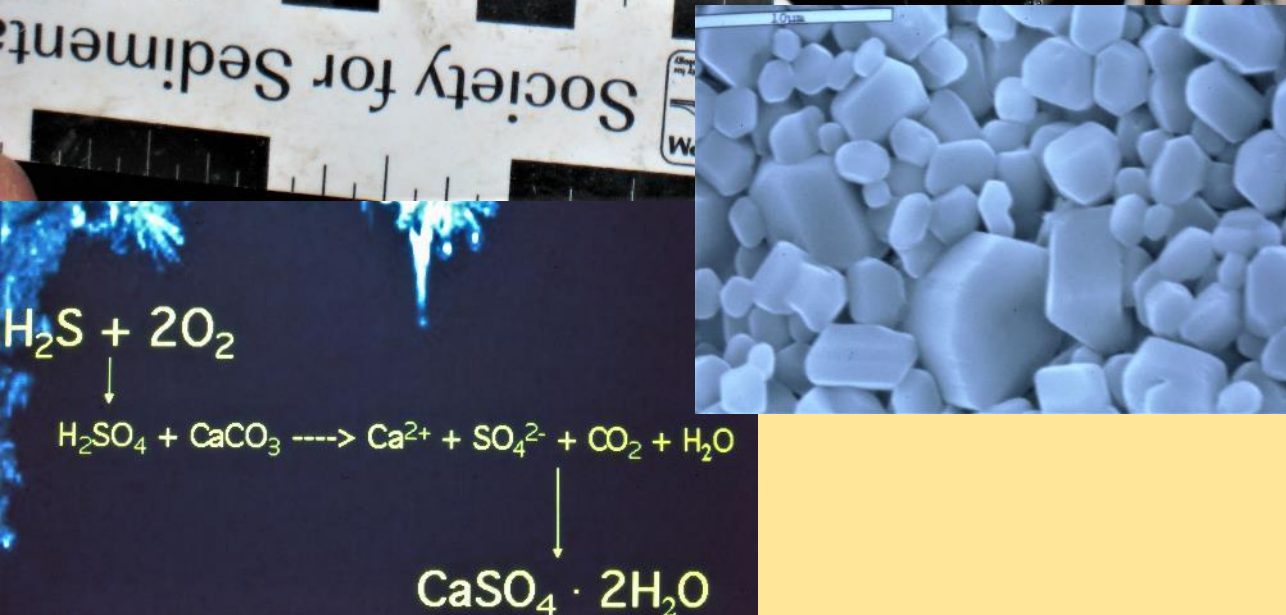

# Stop 1.2

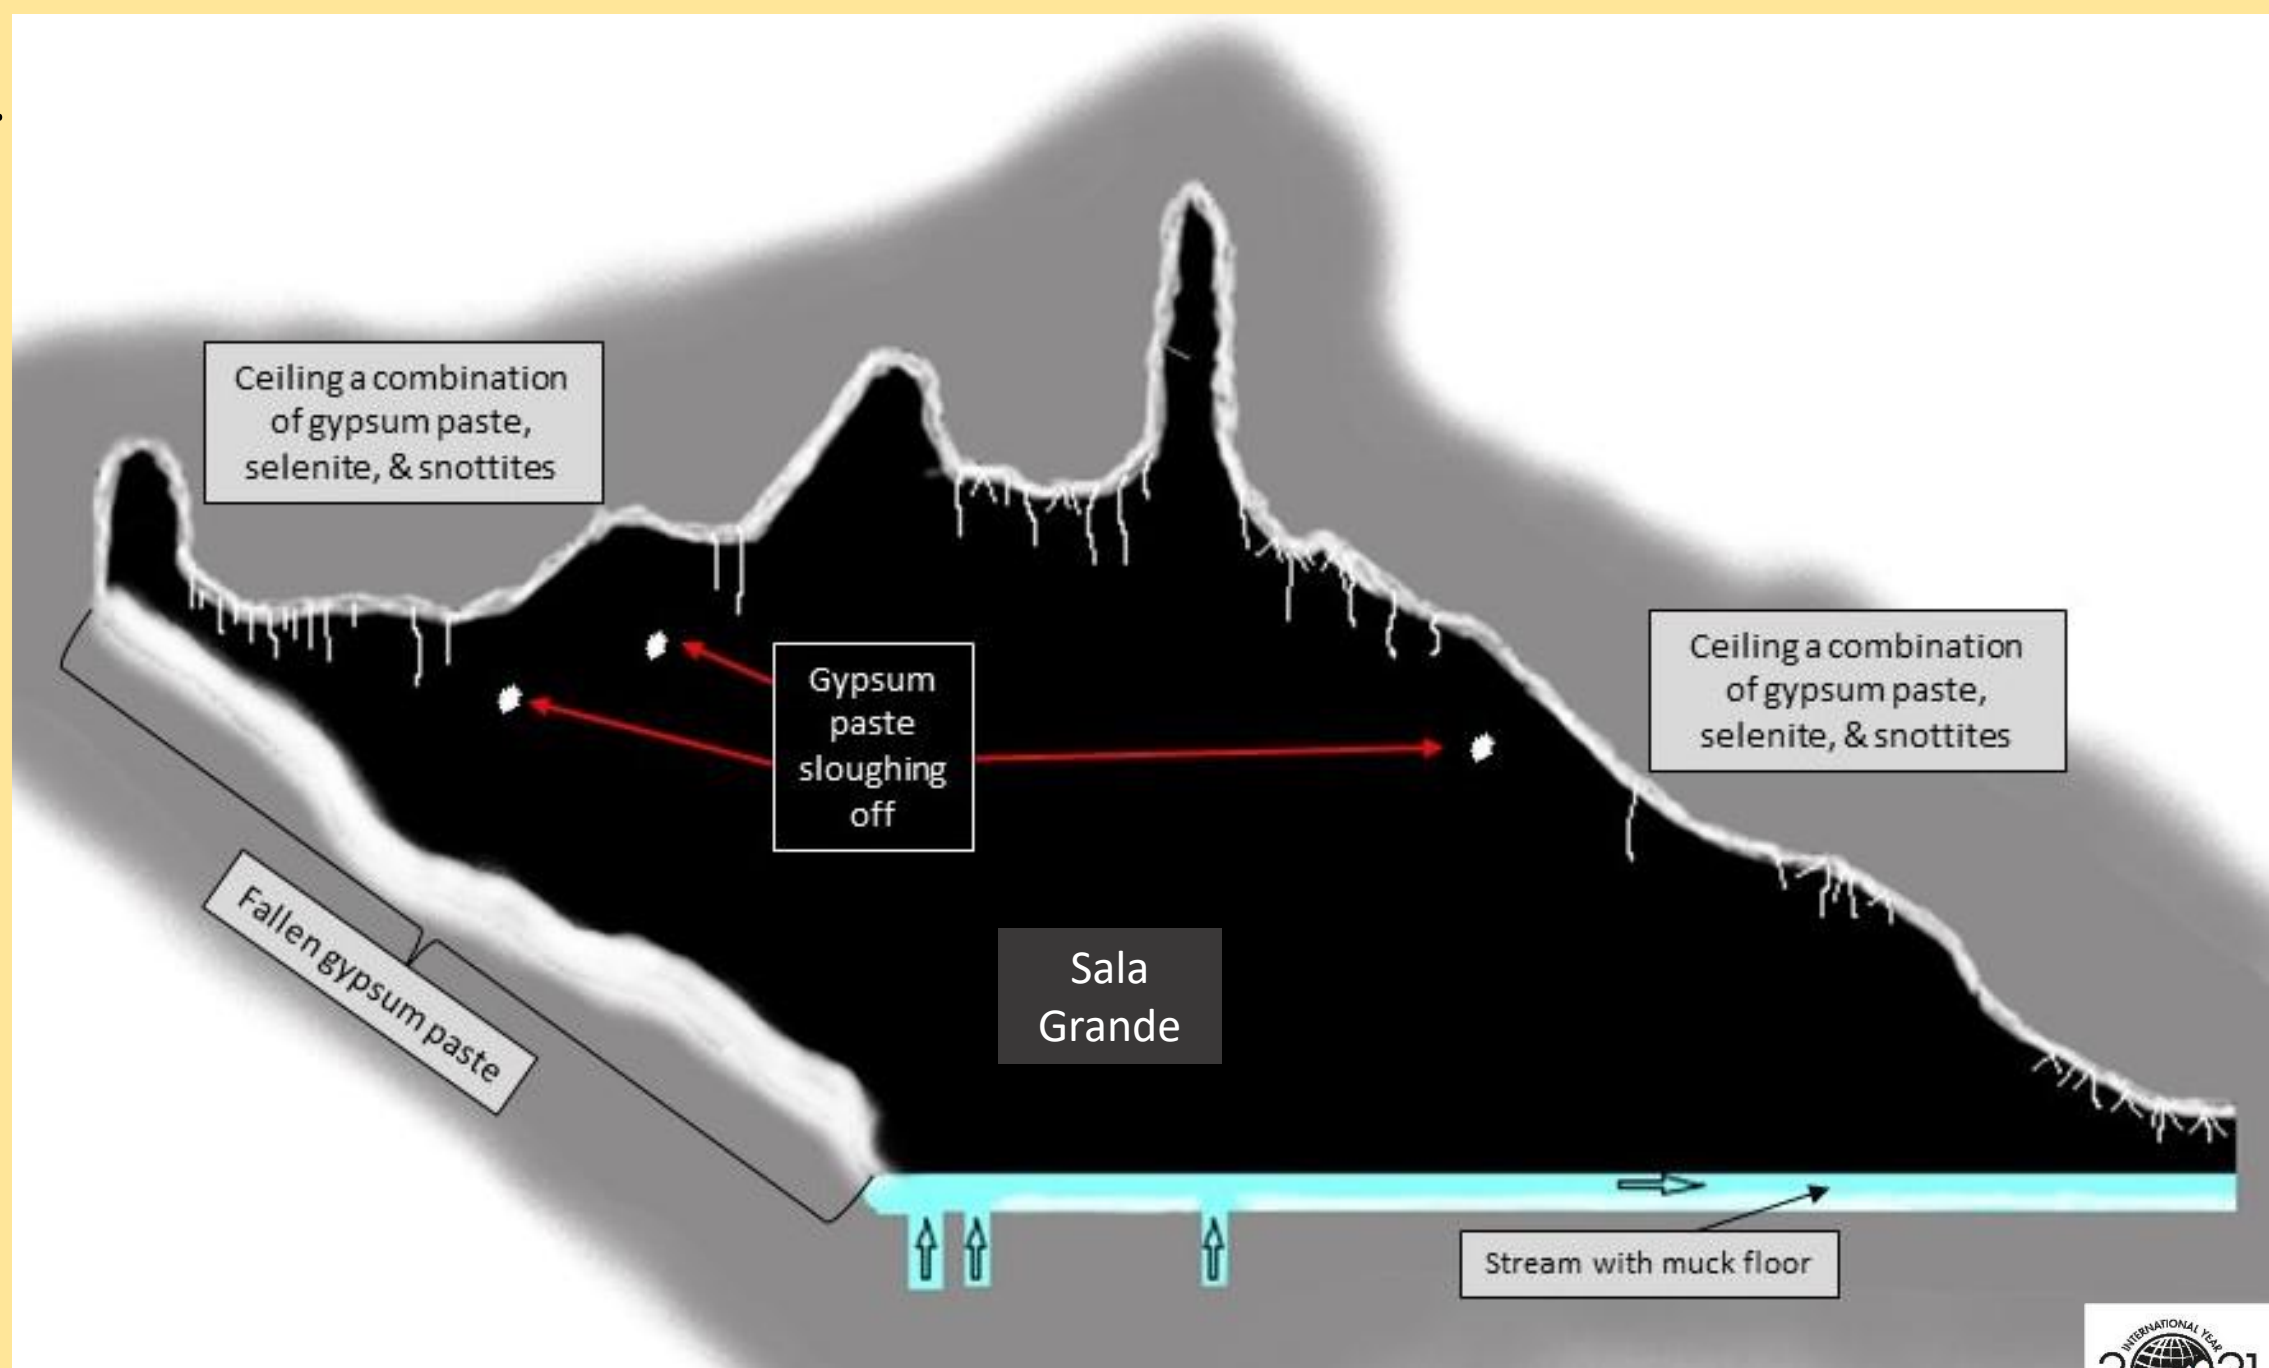

*Hypogenic Caves of the Great Basin: Cueva de Villa Luz*

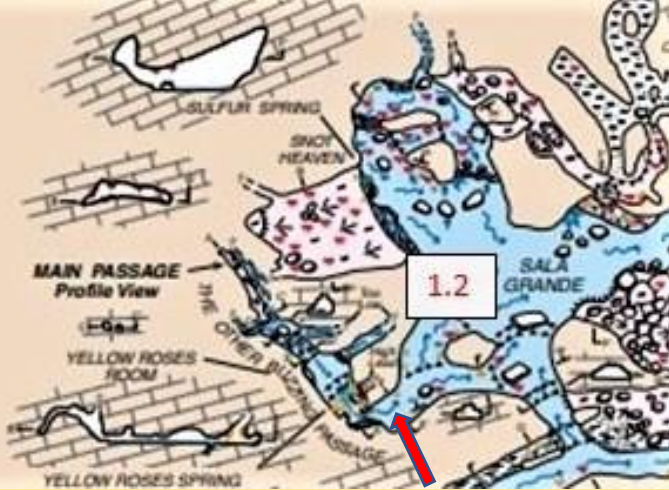

Sulfur folia are microbe-rich deposits of elemental sulfur.

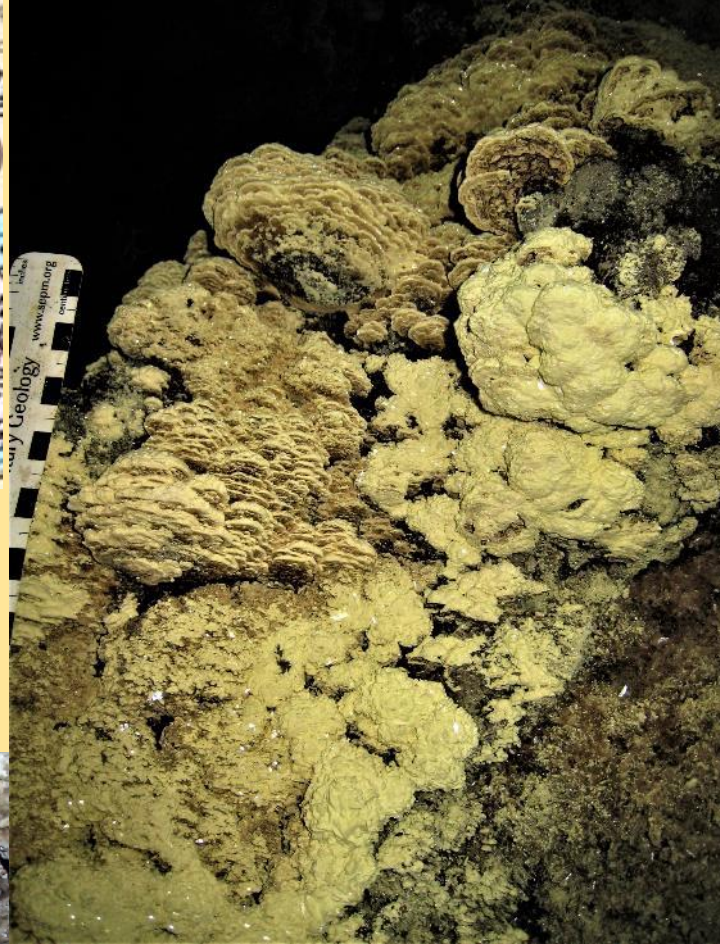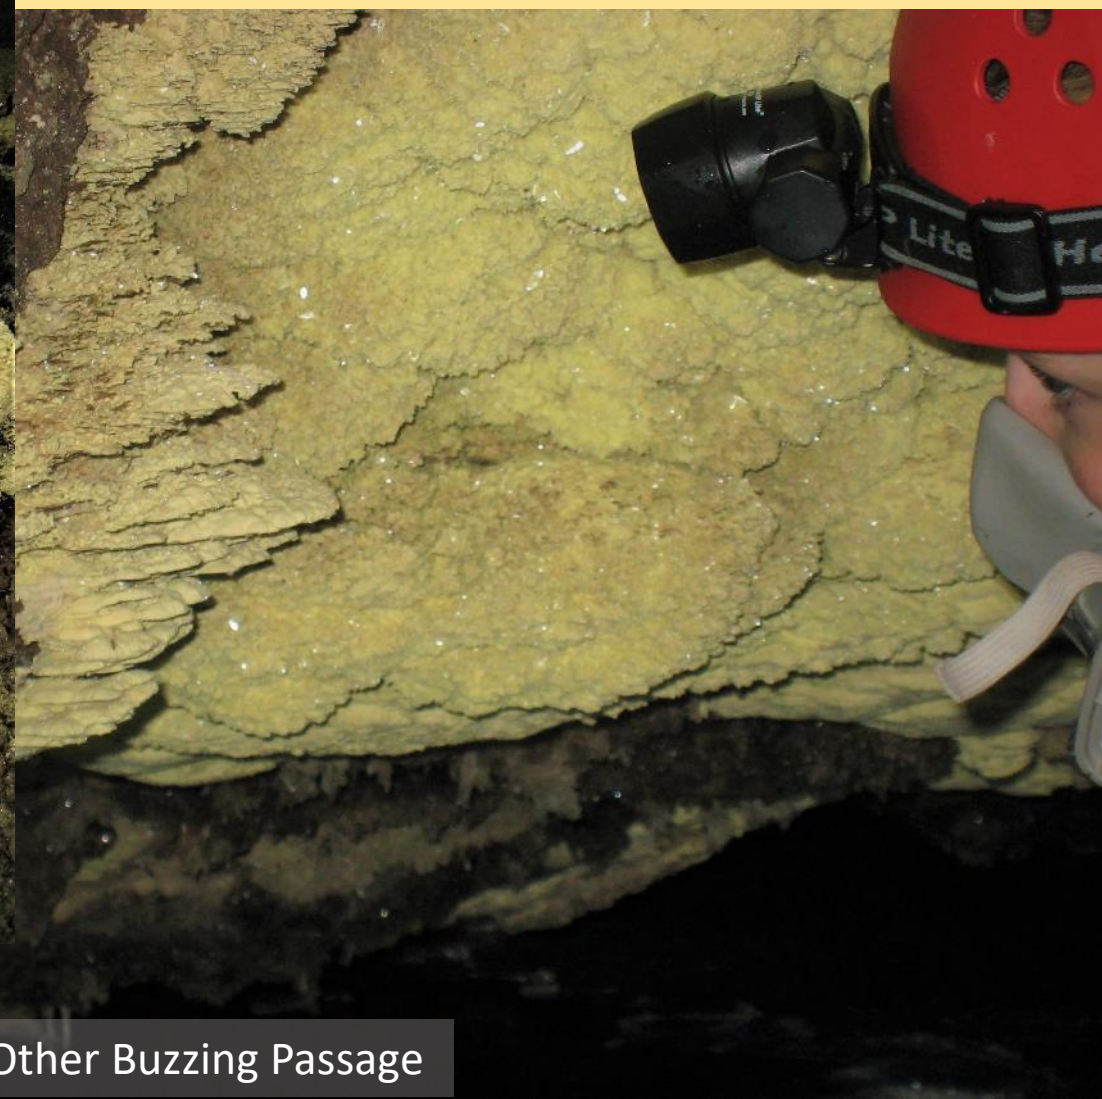

Sulfur folia in Other Buzzing Passage

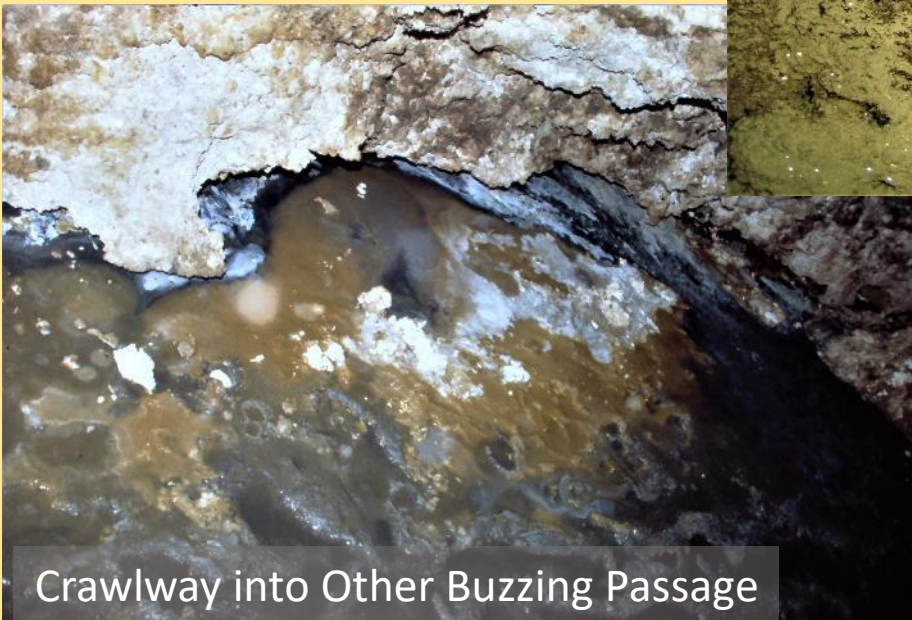

Crawlway into Other Buzzing Passage

Sulfur folia in Cueva de Villa Luz are unique in the world.

- Lake of the Yellow Roses room has the most hazardous atmosphere.
- These folia are clearly deposited sub-aerially on selenite.

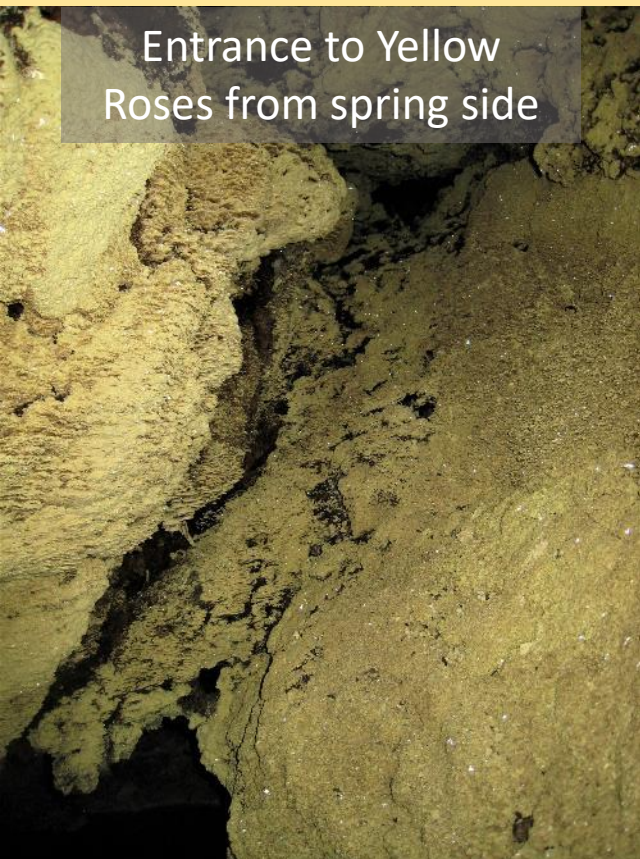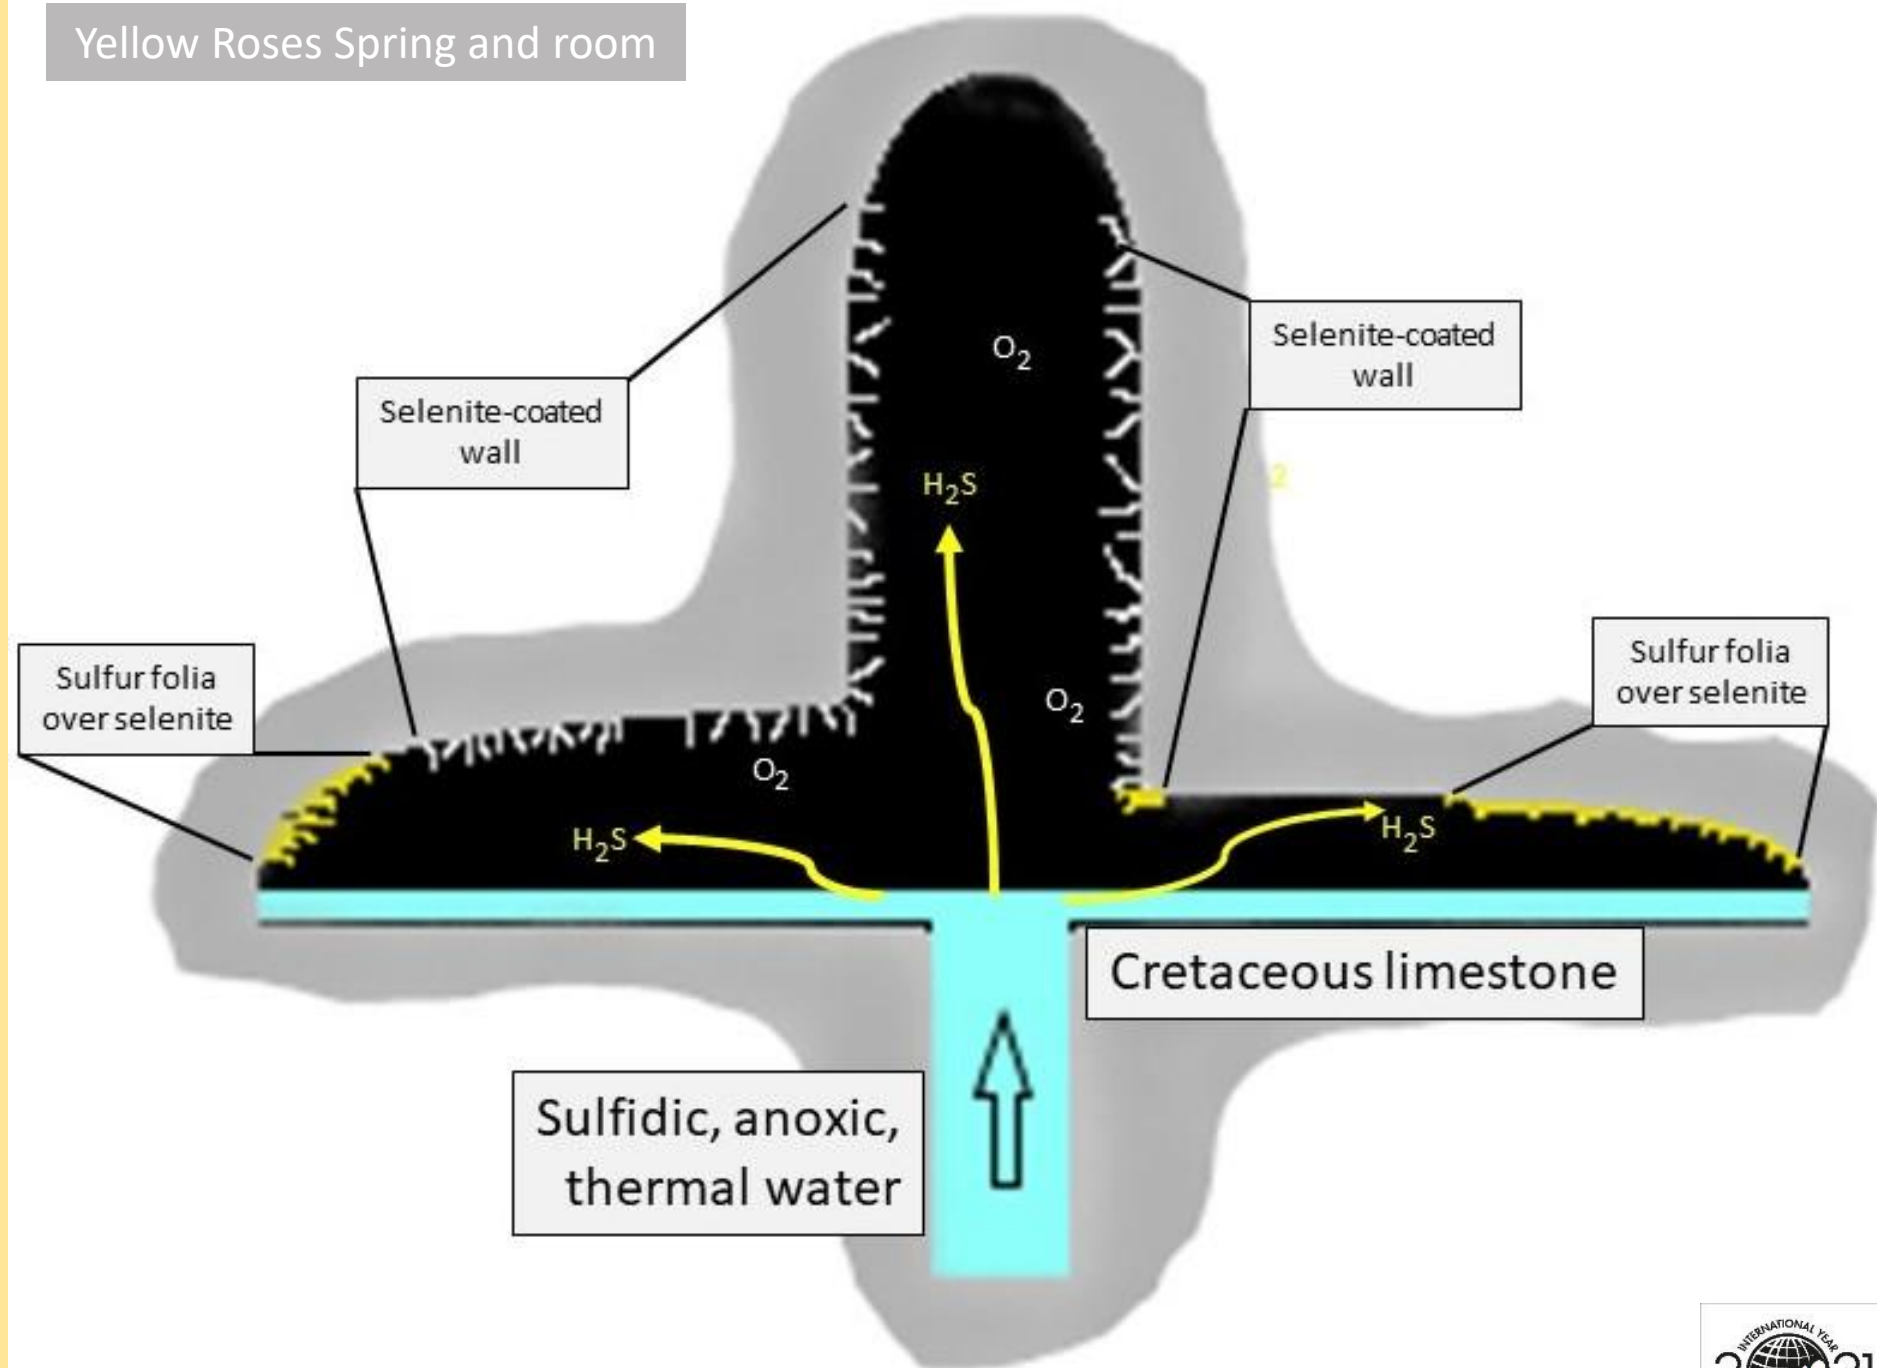

# CUEVA DE VILLA LUZ

Tabasco, Mexico

COMPASS and TAPE SURVEY By:

Jim Pisarcowicz, Louise Hoss, Kelly Mathis, Abby Wines, Noel Daniels, Chris Long, Dave Lester, Chuck Porter, Bob Addis, Fred Luizaer, Aldo Del Porto, Mike Taylor, Carl Allen, Ricki Shaleon, Alan Crossler, Steve Alvarez, Doug Soroka, Lynn Klema and Bob Richards.

SURVEYED DATES: January 1997, January & April 1998, January & August 2000.

CARTOGRAPHY BY: Bob Richards and Louise Hoss

CAVE LENGTH: 1,987 meters

CAVE DEPTH: 23 meters

Plan and profile view is projected 40 degrees from true north.

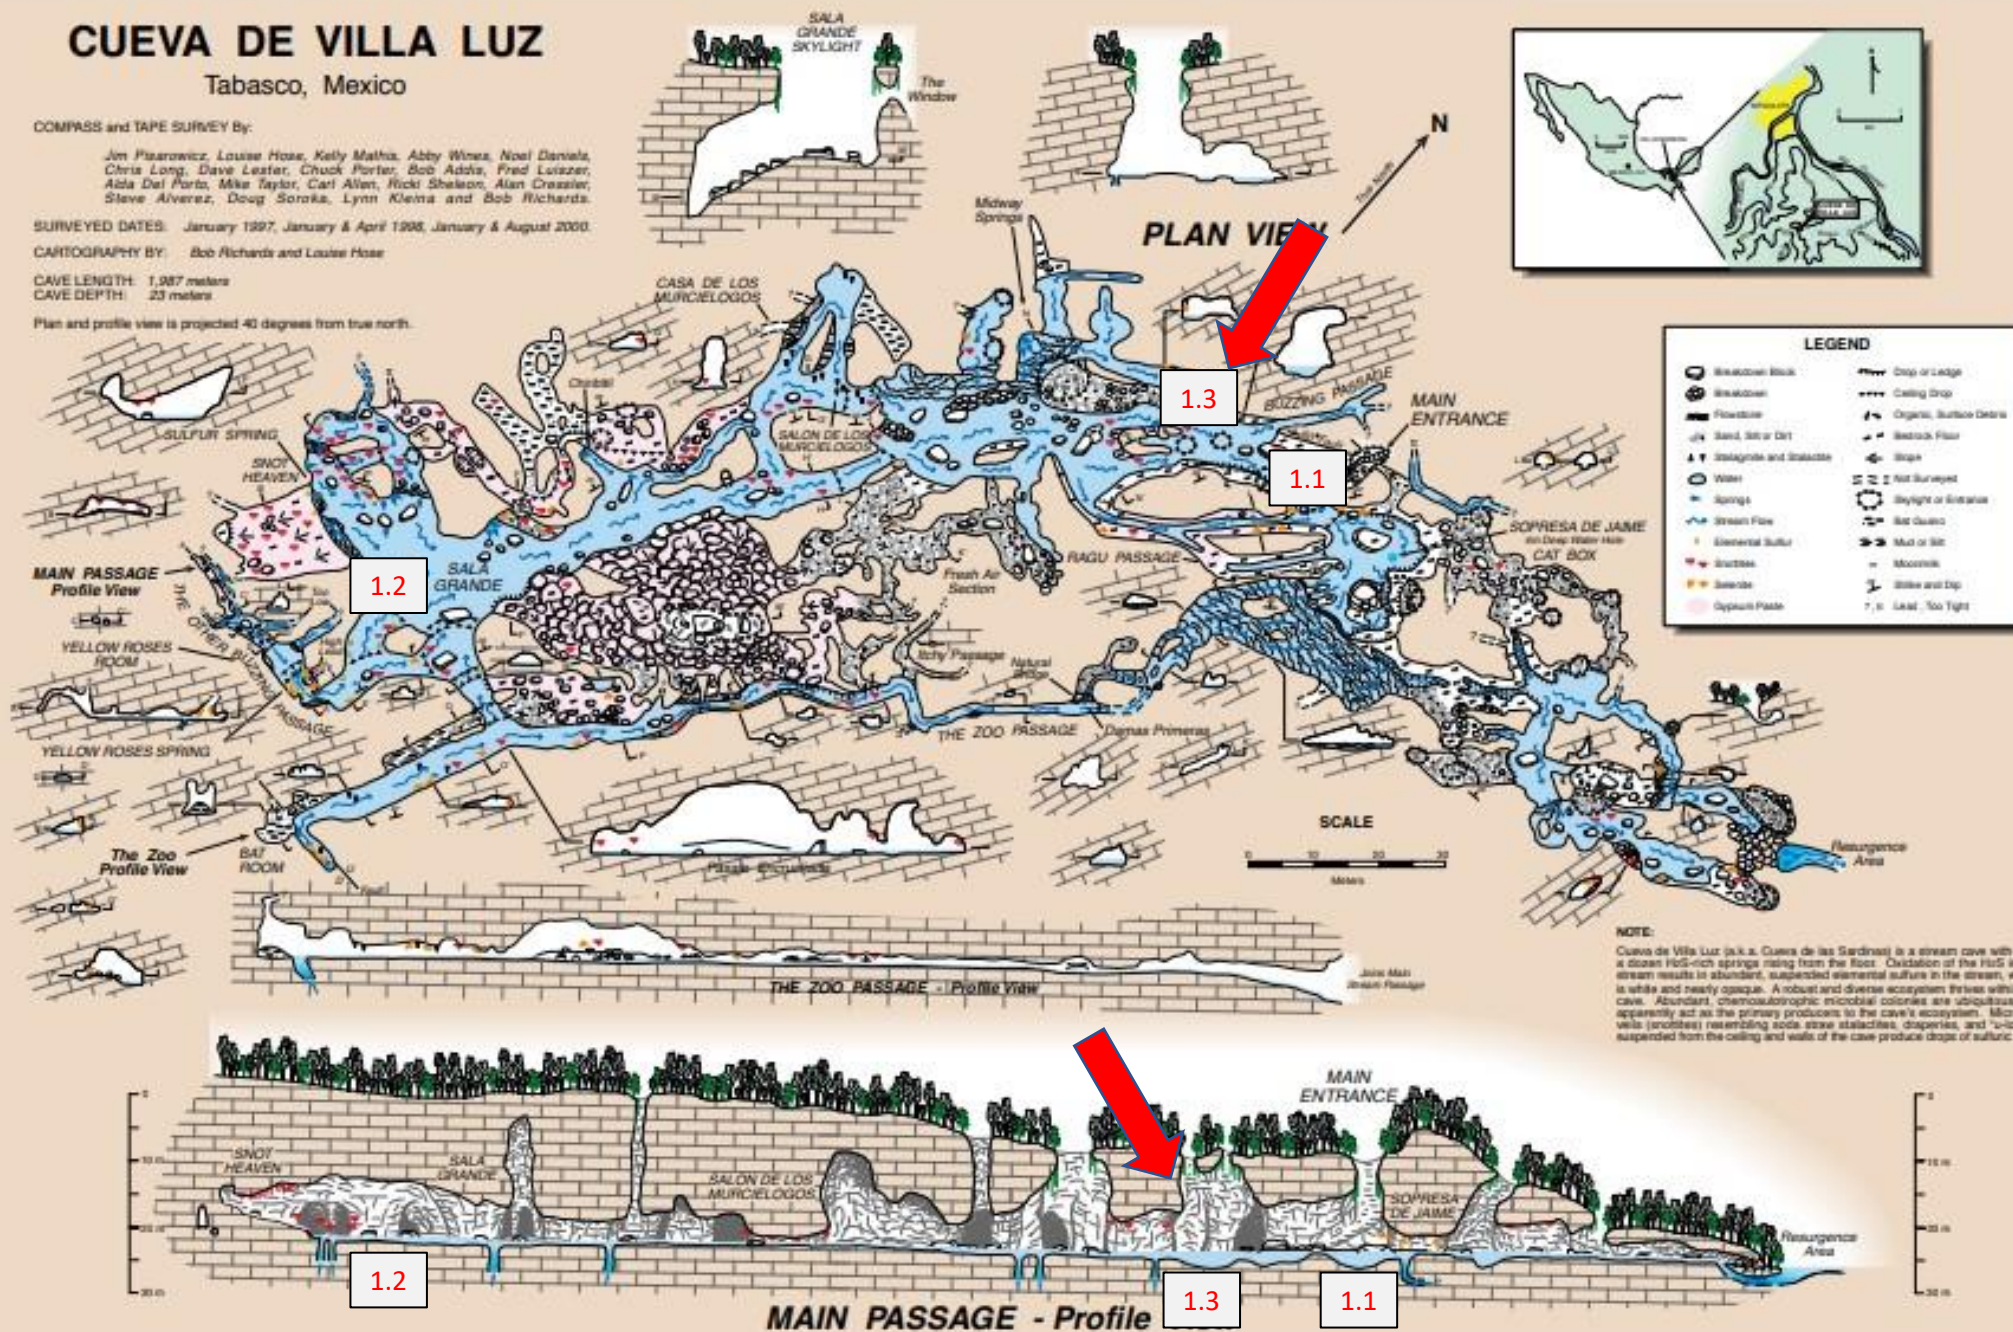

# Stop 1.3

## Biovermiculations

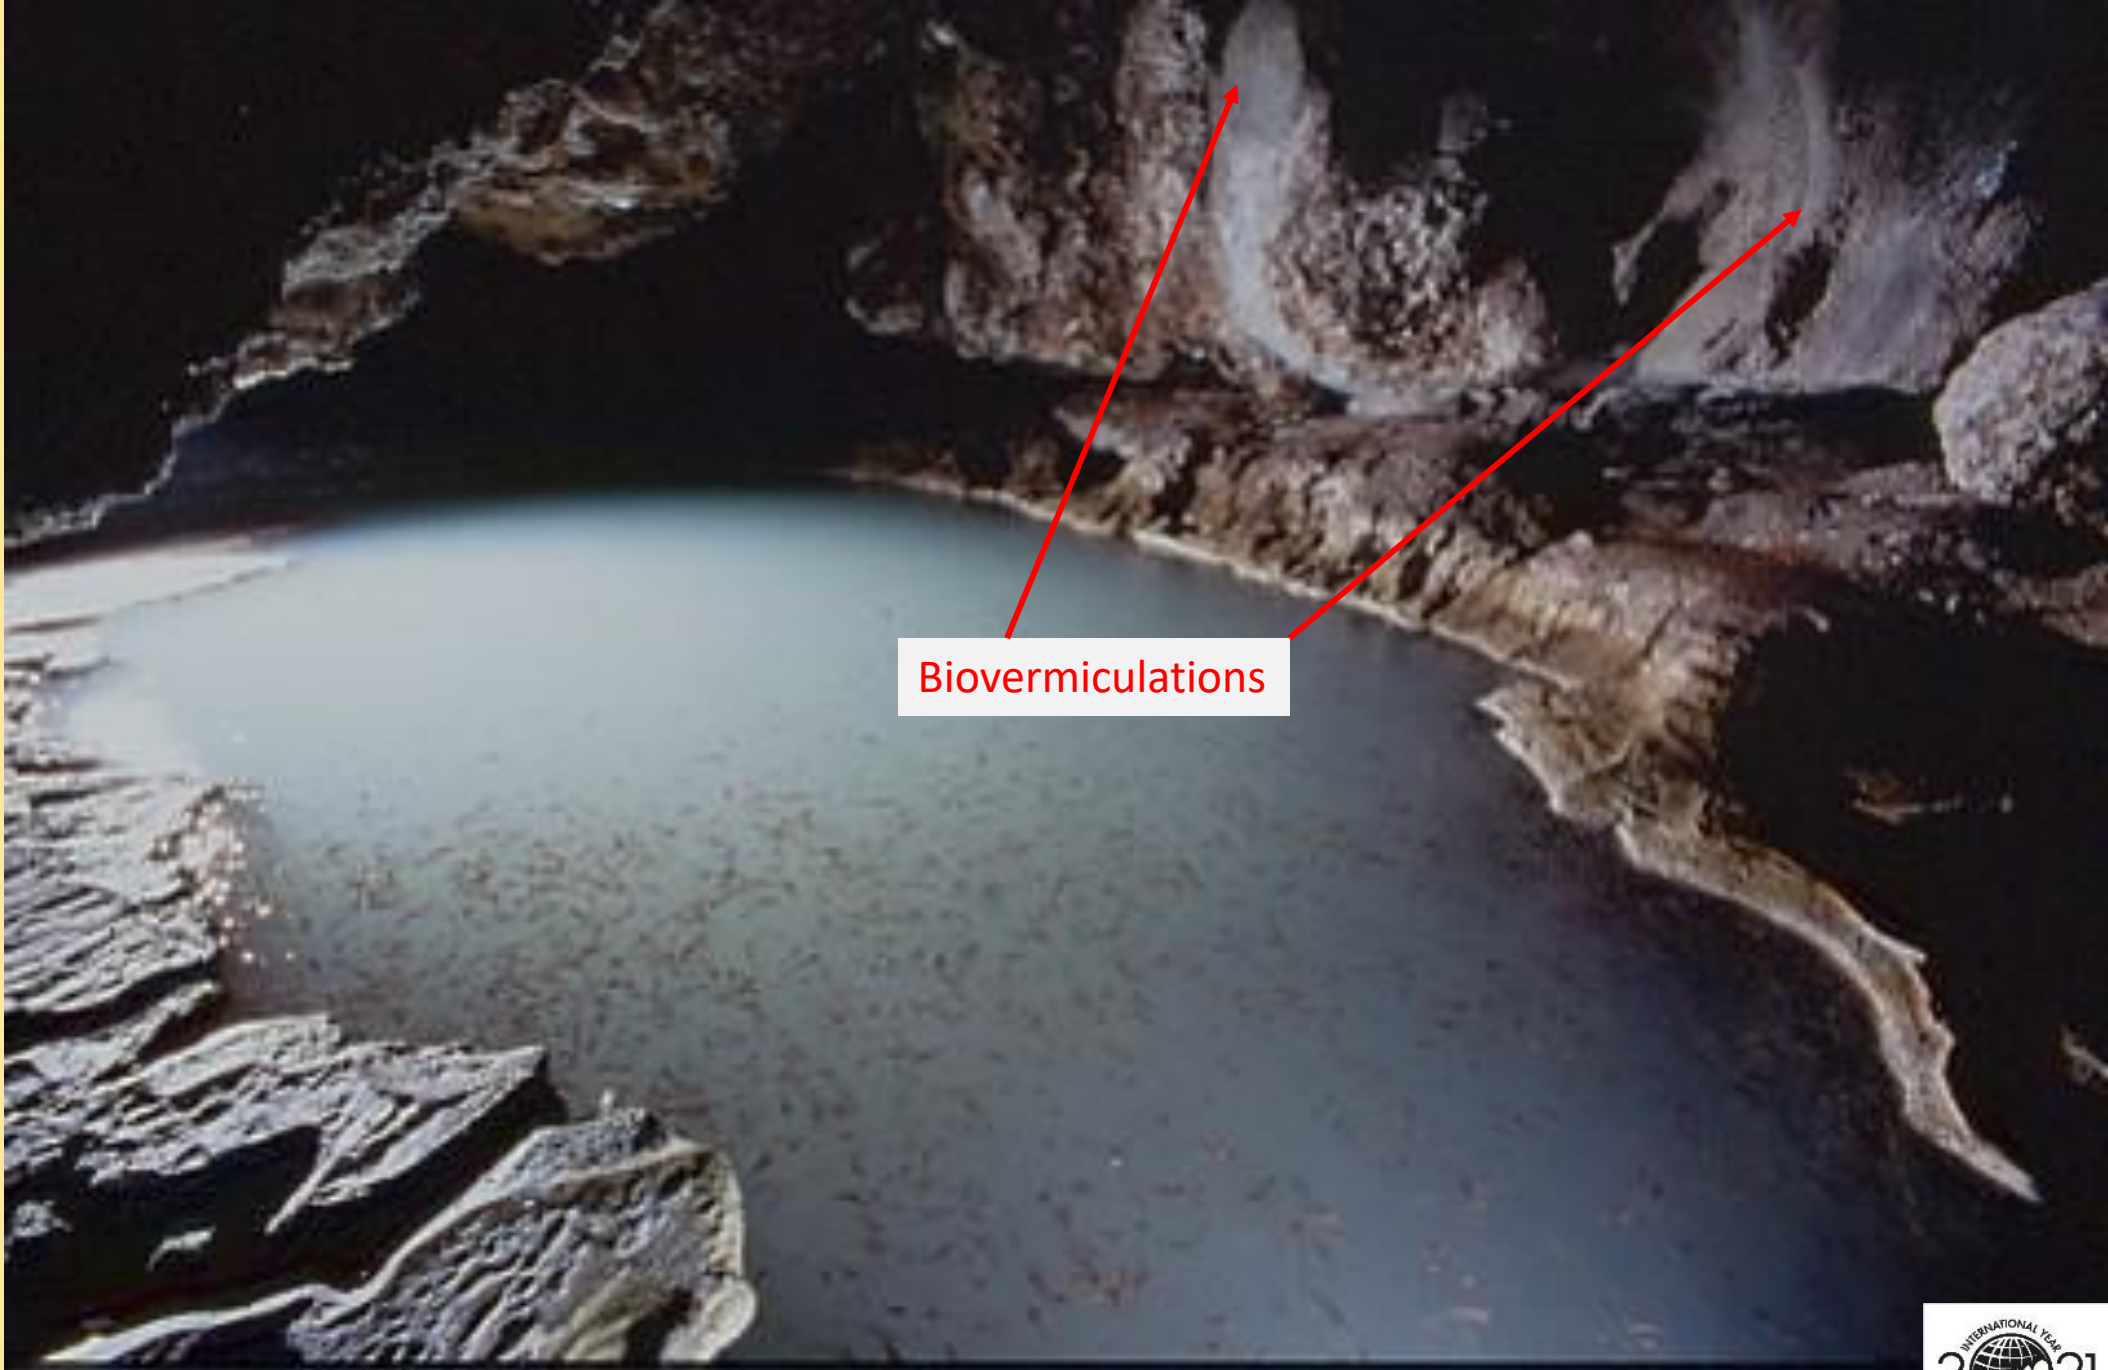

Biovermiculations

Biovermiculations are colonies of bacteria and fungi with captured detritus that grow on bare limestone.

- They grow in the lower sulfidic areas.
- They have a variety of colors.
- In CVL, they seem to act as “pioneer organisms.”

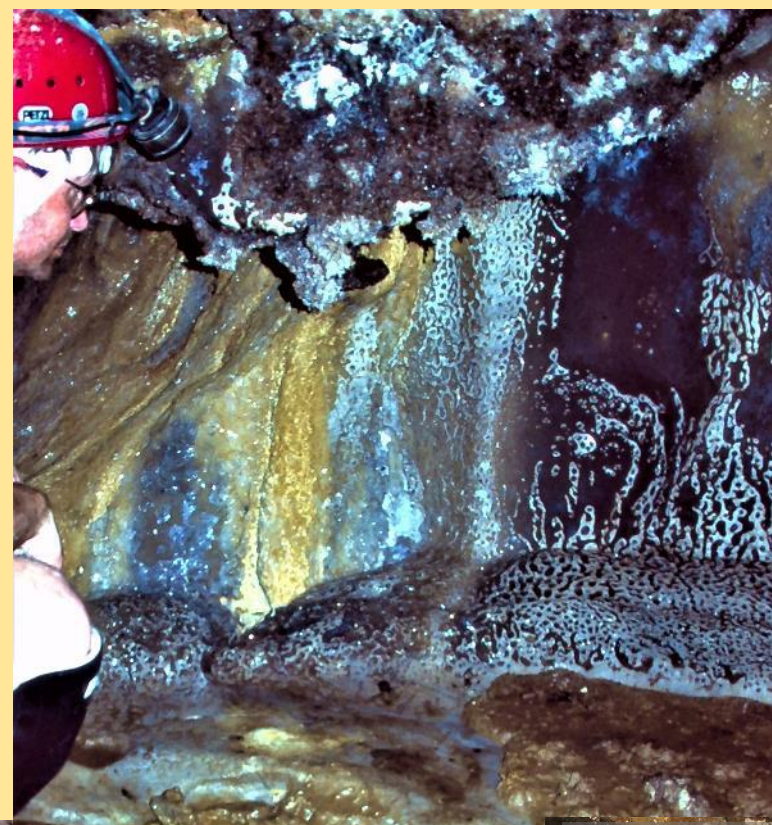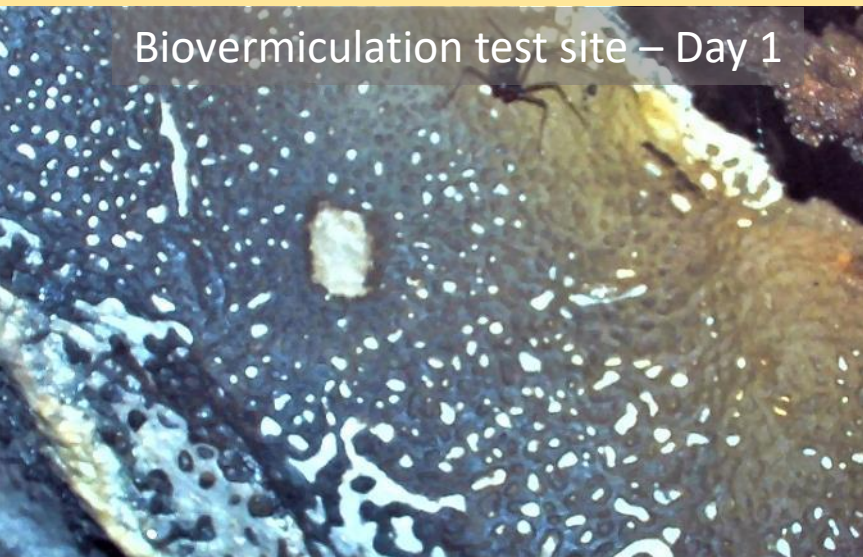

Biovermiculation test site – Day 1

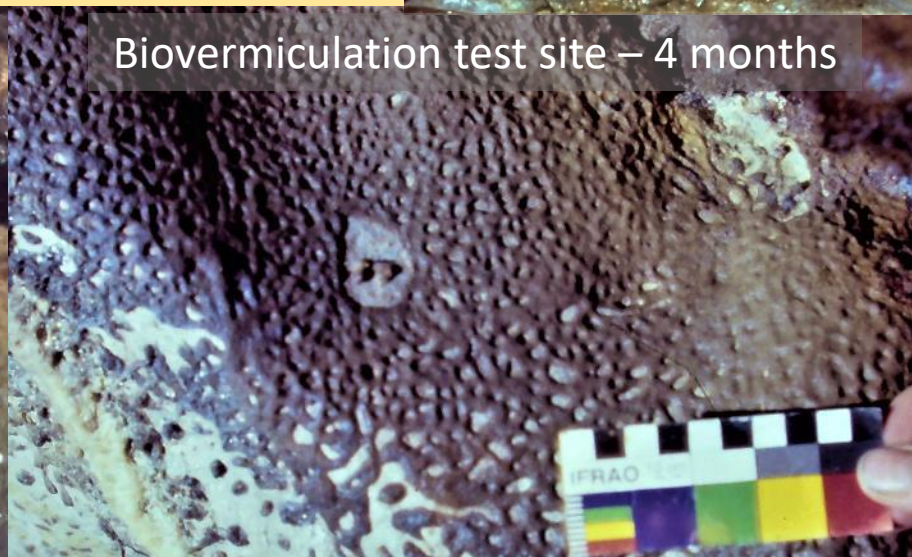

Biovermiculation test site – 4 months

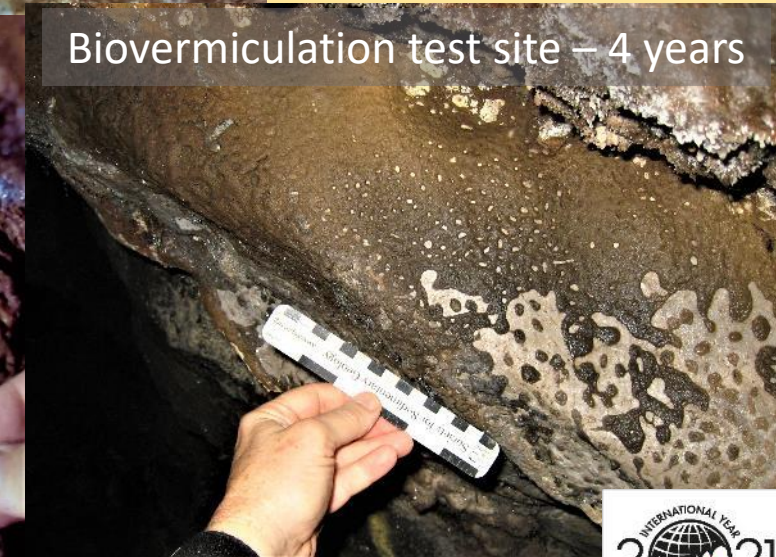

Biovermiculation test site – 4 years

## Stop 1.3

A classic acid  
pool

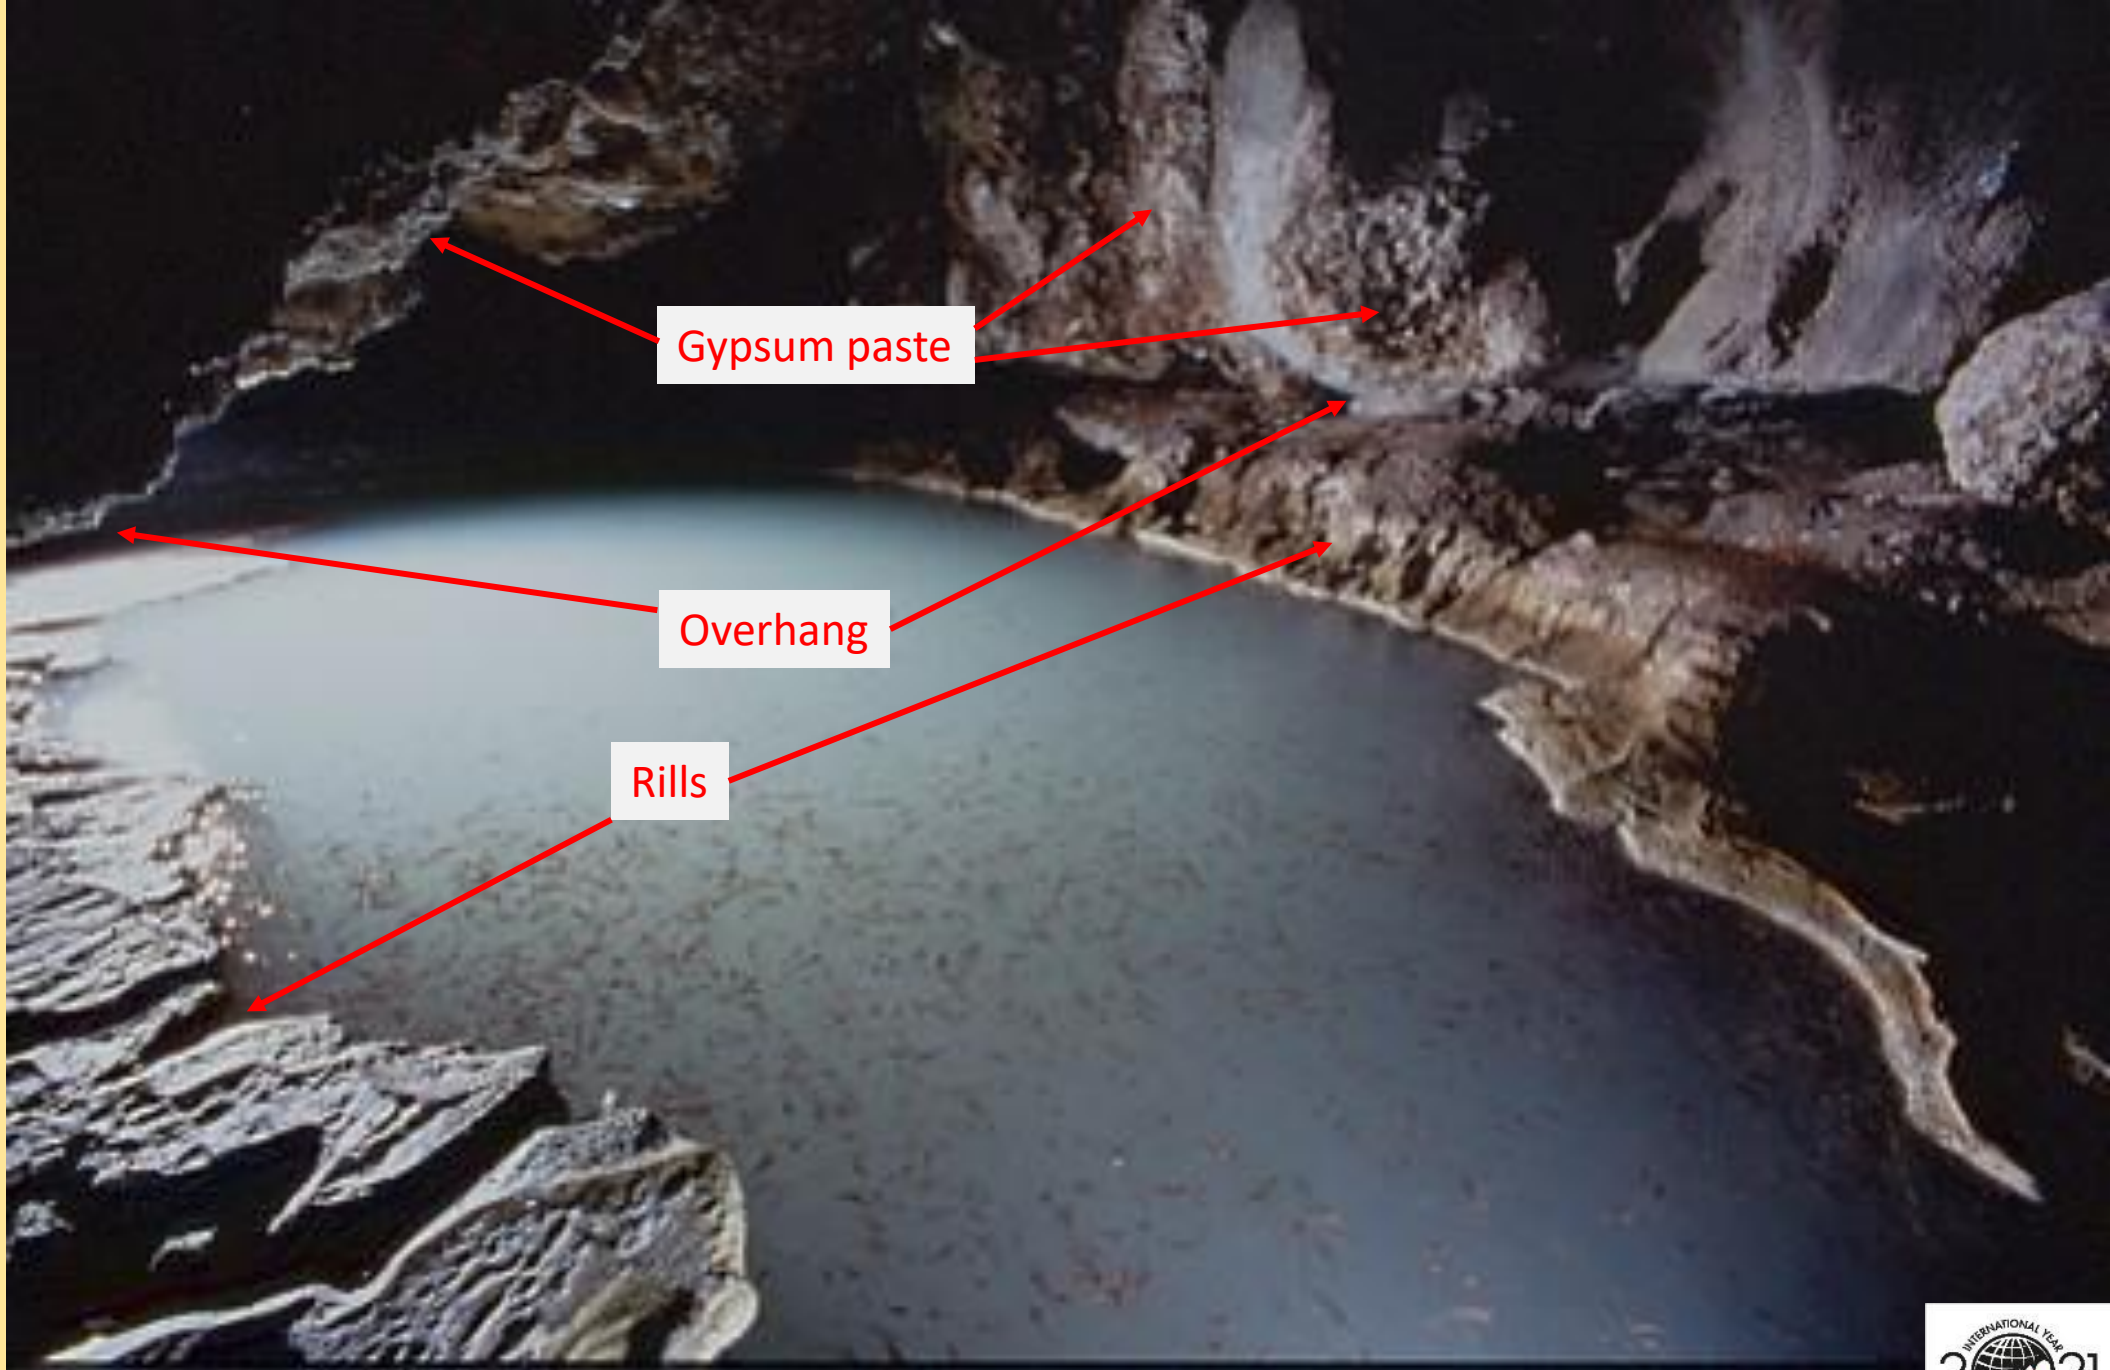

*Hypogenic Caves of the Great Basin: Cueva de Villa Luz*

# Stop 1.3

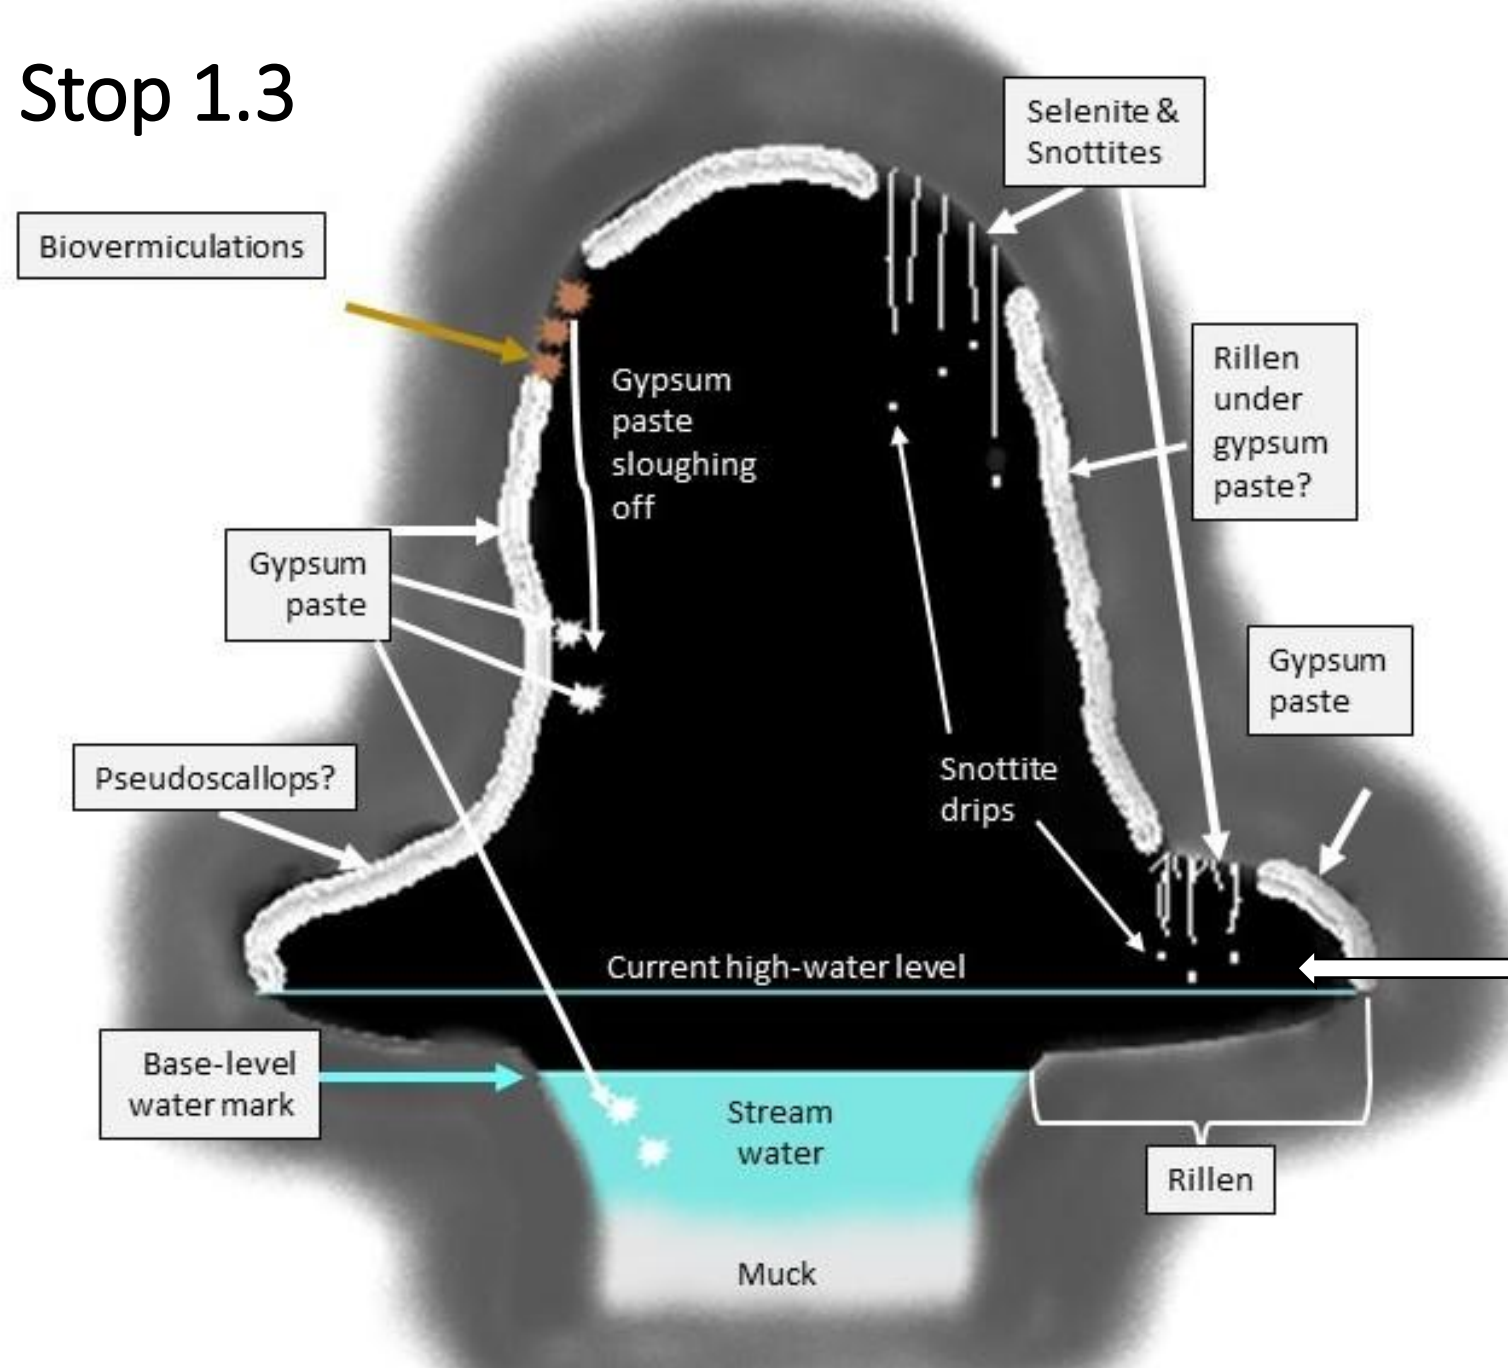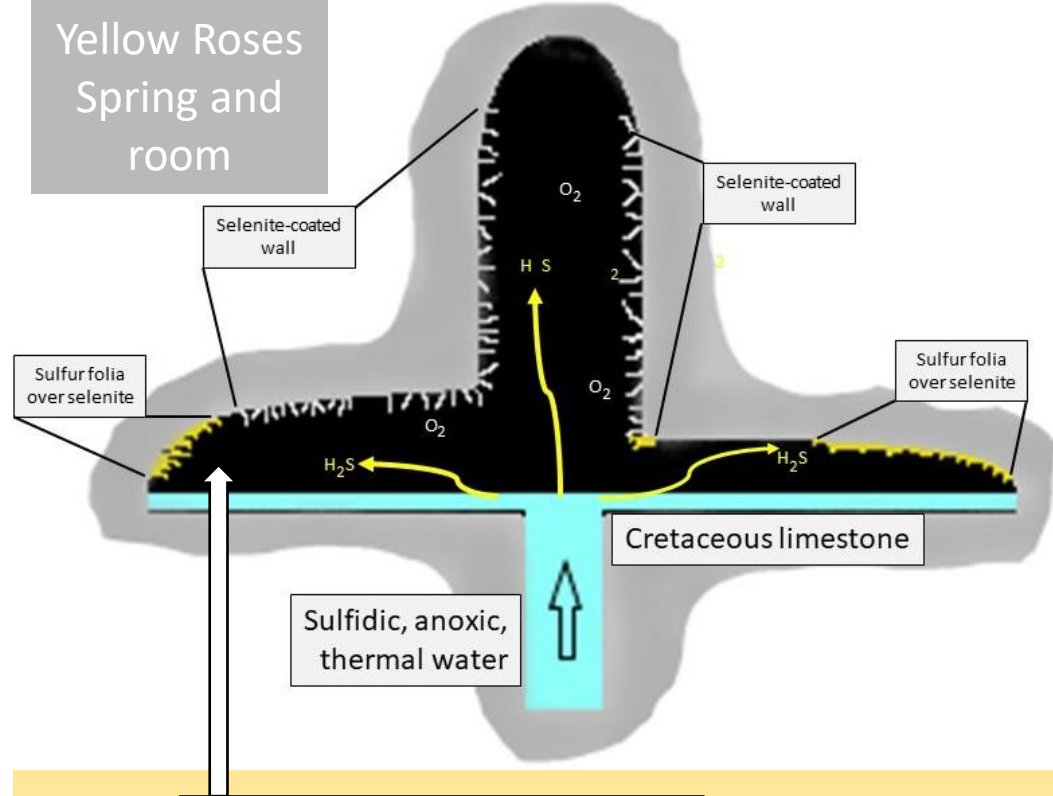

Note the bare rock shelves with a notch above the pool/stream. We'll return to this morphology.

Remember this model as it appears in ancient, hypogenic, sulfidic caves later in the field trip.

Photo by James Pisarowicz

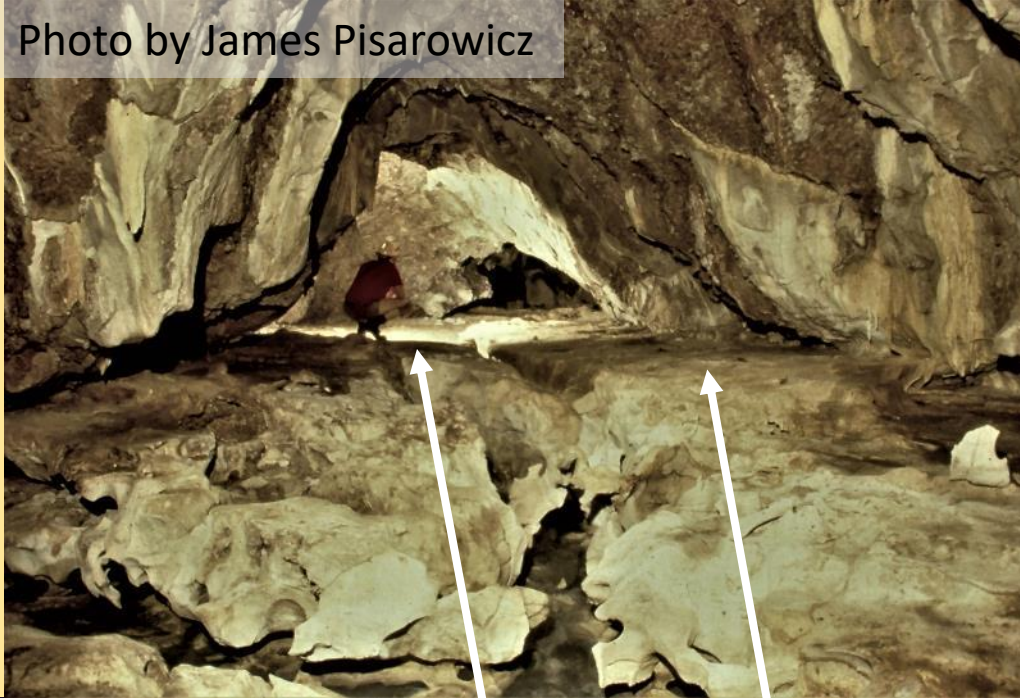

Note the bare rock shelves with a notch above the pool/stream. We'll return to this morphology.

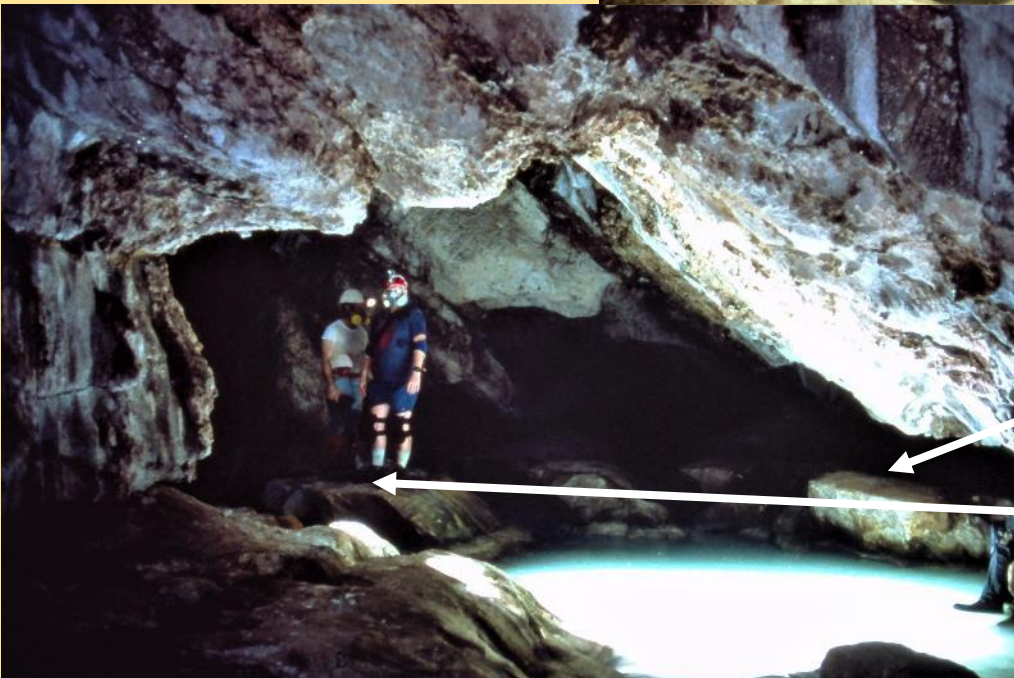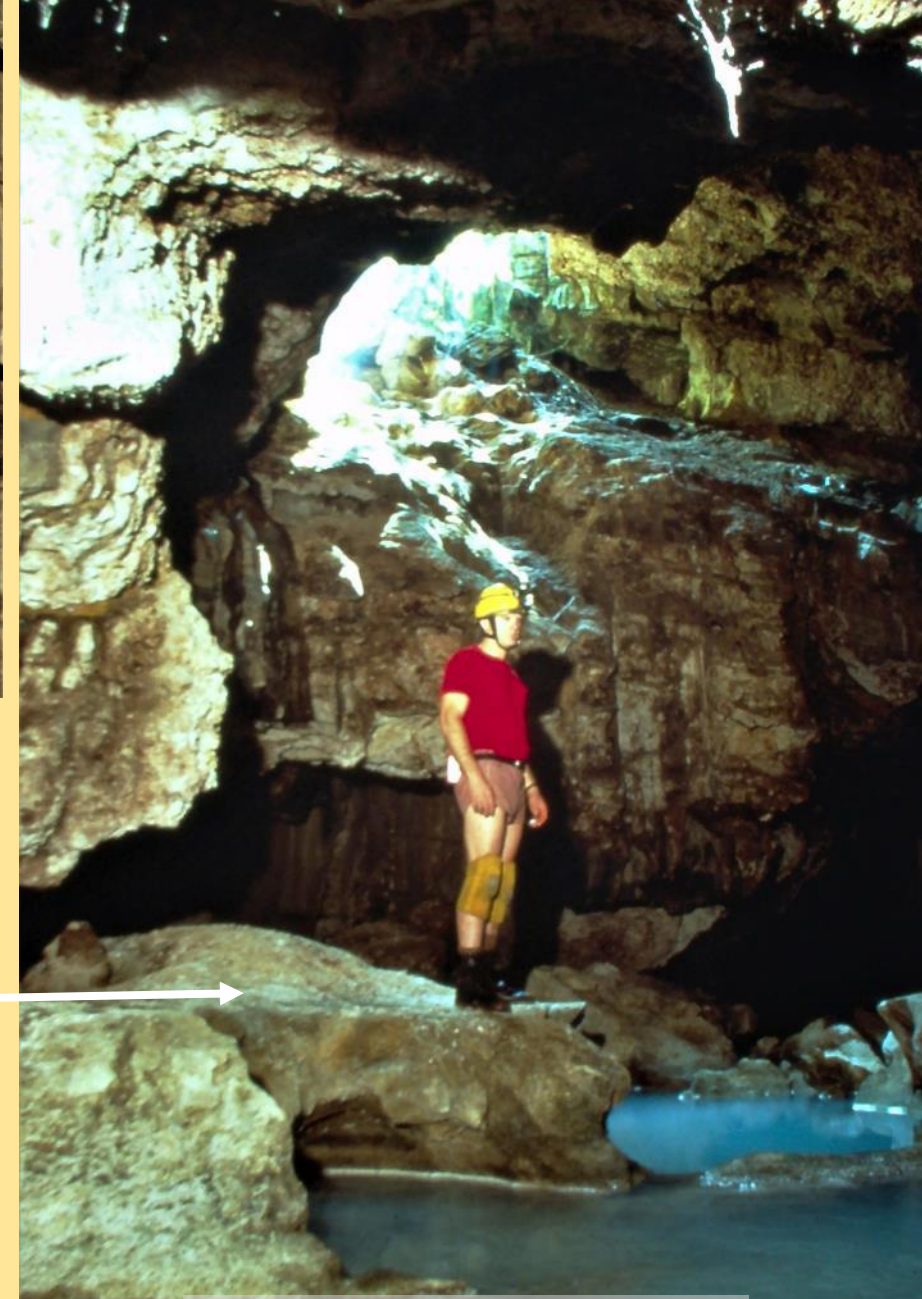

Photo by James Pisarowicz

*Hypogenic Caves of the Great Basin: Cueva de Villa Luz*

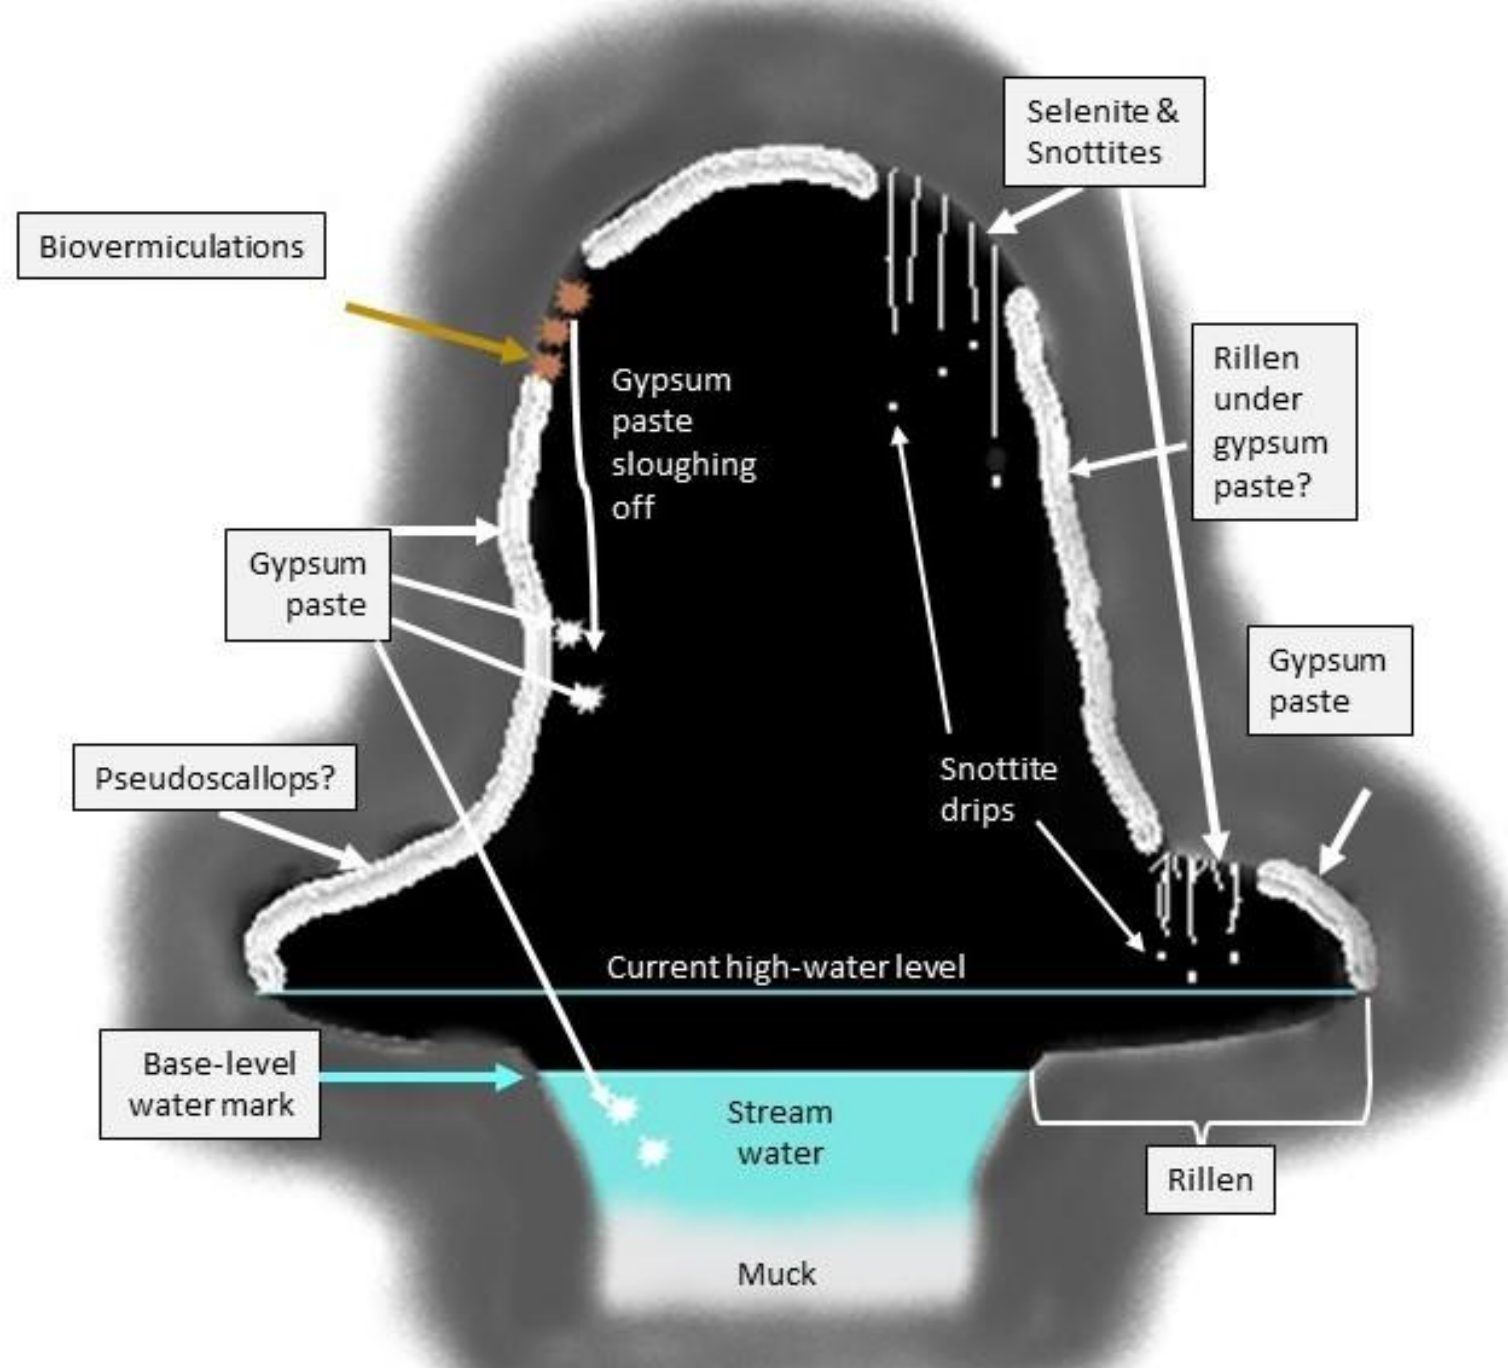

# QUESTIONS?

# Frasassi Caves, Italy

|                                  |                 |      |
|----------------------------------|-----------------|------|
| ➤ Introduction                   | 0900 PDT        |      |
| ➤ Stop 1 – Cueva de Villa Luz    | 0905 PDT        |      |
| ➤ <b>Stop 2 – Frasassi Caves</b> | <b>0930 PDT</b> |      |
| <b>Dan Jones</b>                 |                 |      |
| ➤ Stop 3 – Carlsbad Cavern       | 0955 PDT        |      |
| ➤ Stop 4 – Lechuguilla Cave      | 1015 PDT        |      |
| ➤ Stop 5 – Sacramento Pass       | 1035 PDT        |      |
| ➤ Break/Intermission<br>PDT      |                 | 1055 |
| ➤ Stop 6 – Lehman Caves          | 1105 PDT        |      |
| ➤ Break/Intermission<br>PDT      |                 | 1245 |
| ➤ Stop 7 – Burial Cave<br>PDT    |                 | 1255 |
| ➤ Stop 8 – Crystal Ball Cave     | 1305 PDT        |      |
| ➤ Stop 9 - Pescio Cave<br>PDT    |                 | 1315 |
| ➤ Stop 10 – Discovery Cave       | 1325 PDT        |      |
| ➤ Stop 11 – Old Mans Cave        | 1335 PDT        |      |
| ➤ Summary and questions          | 1345 PDT        |      |

Daniel S. Jones

New Mexico Tech

Dept. of Earth and Environmental Science

Natl. Cave and Karst Research Inst. (NCKRI)

daniel.s.jones@nmt.edu, @geomicrobe

Most photos used for this fieldtrip were taken  
by Daniel Jones and Jennifer Macalady

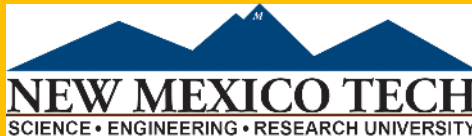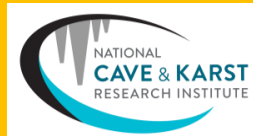

# The Frasassi Caves

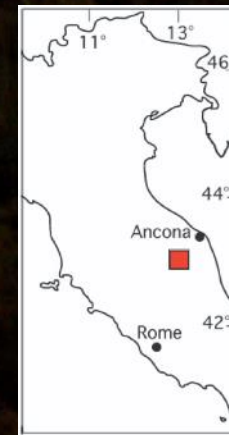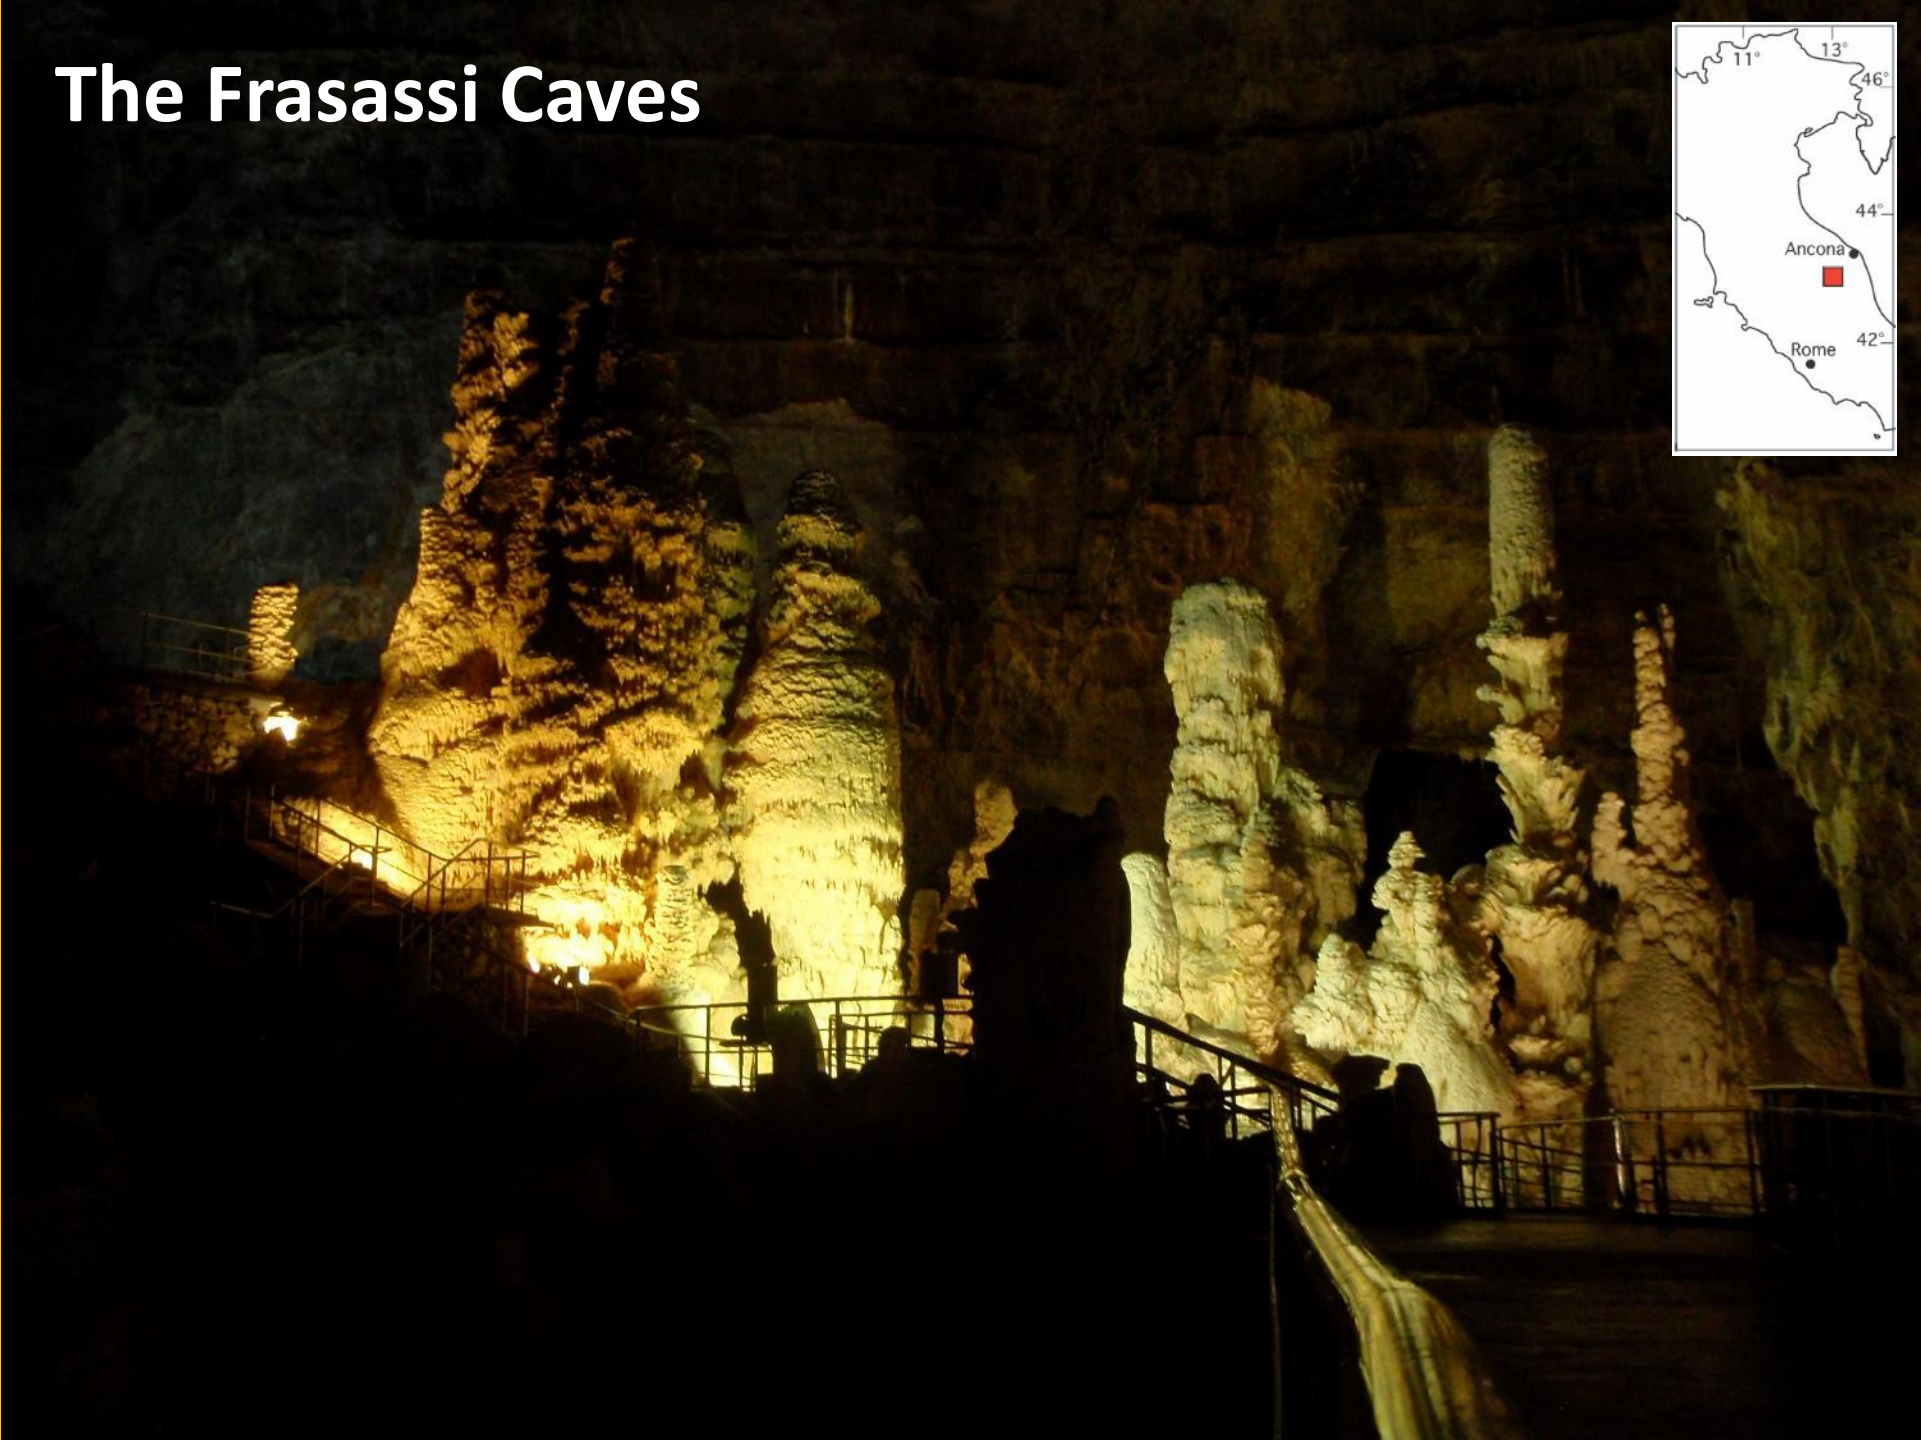

The Frasassi caves are a sulfidic cave system

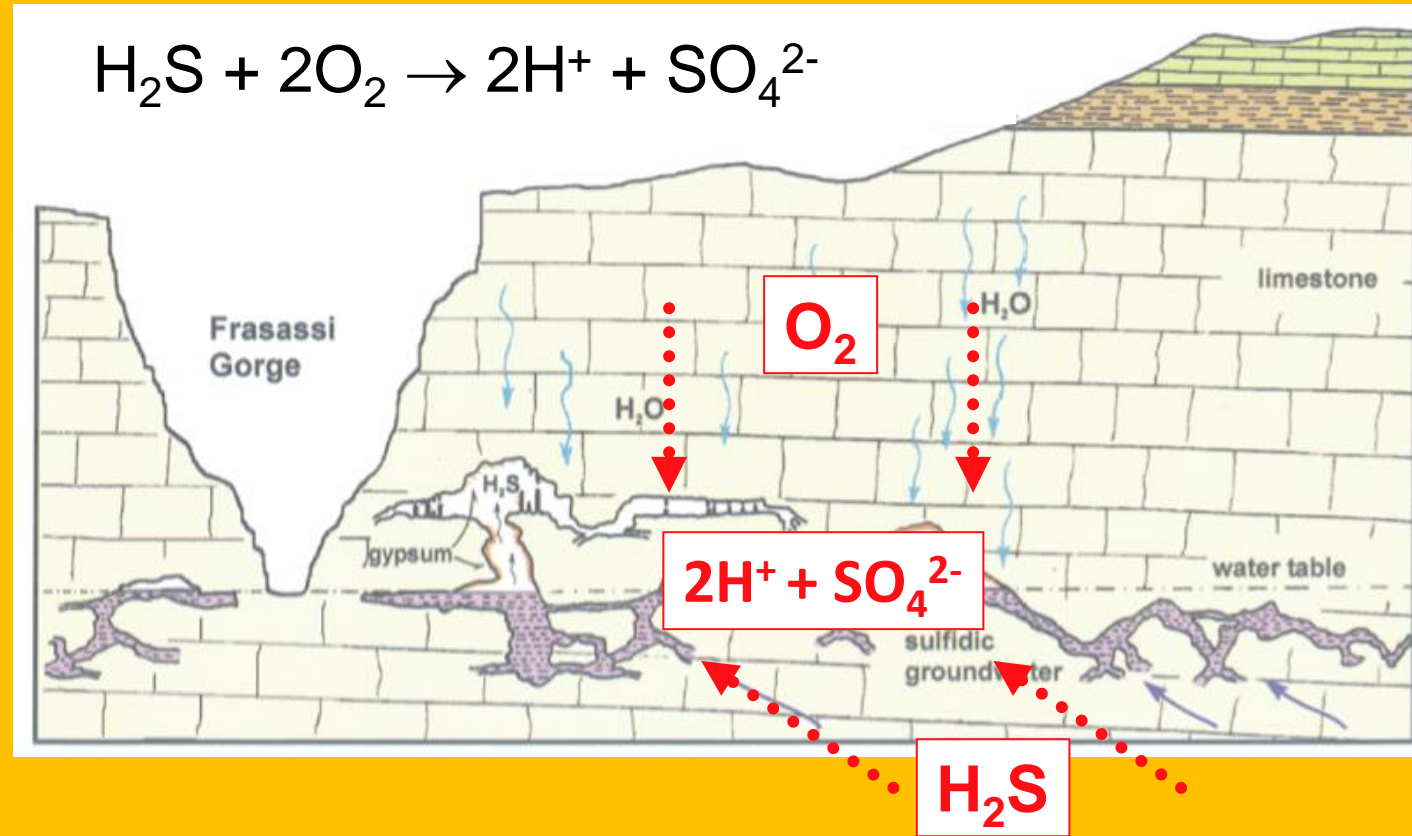

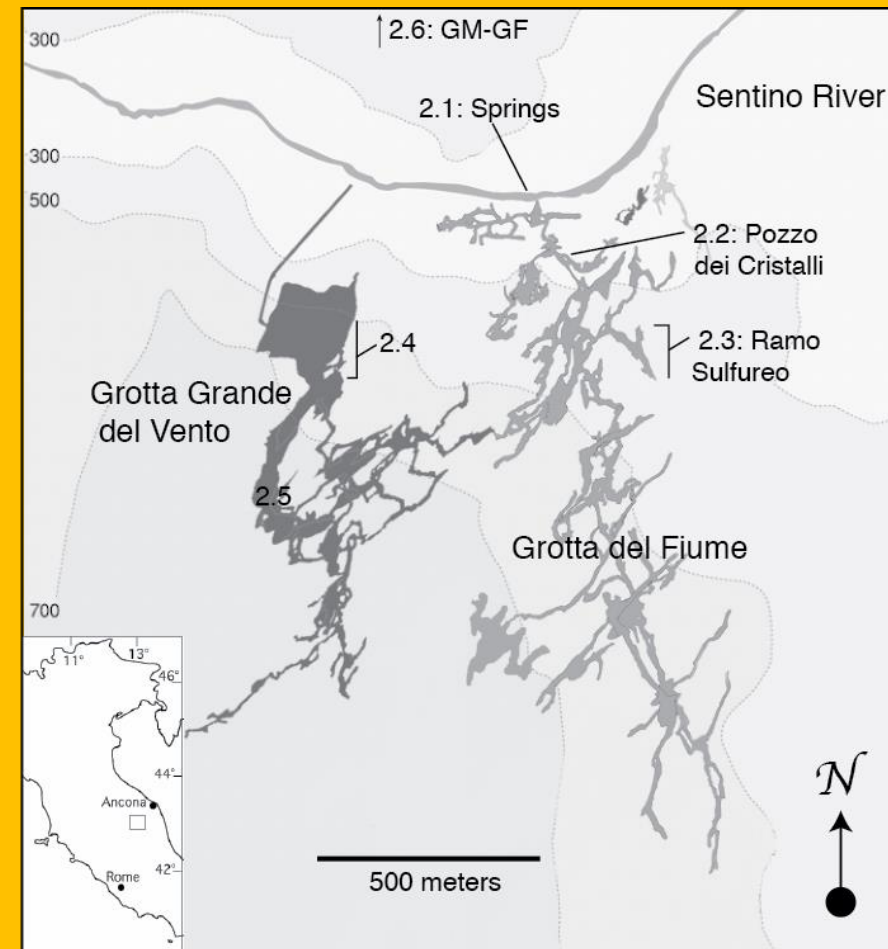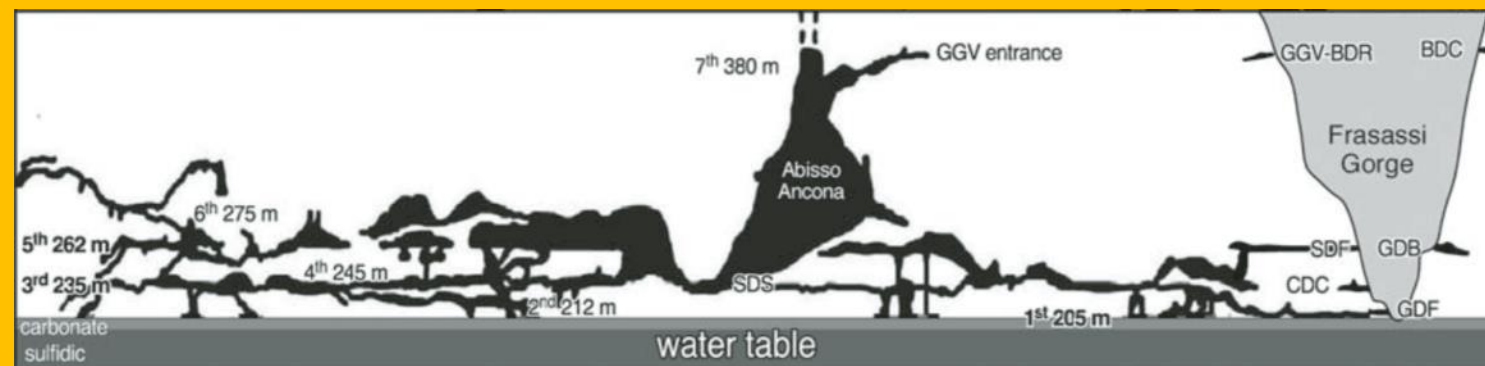

# Trip overview and route to the caves

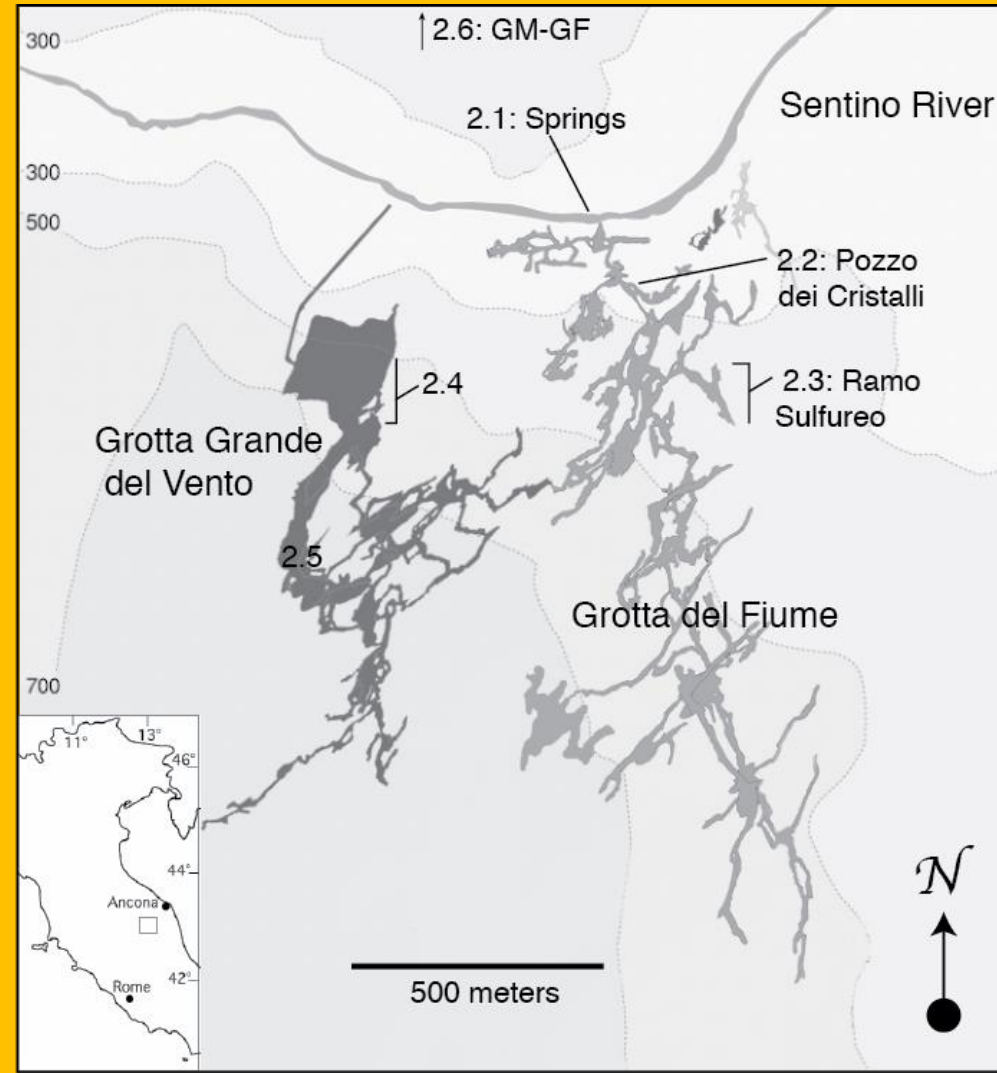

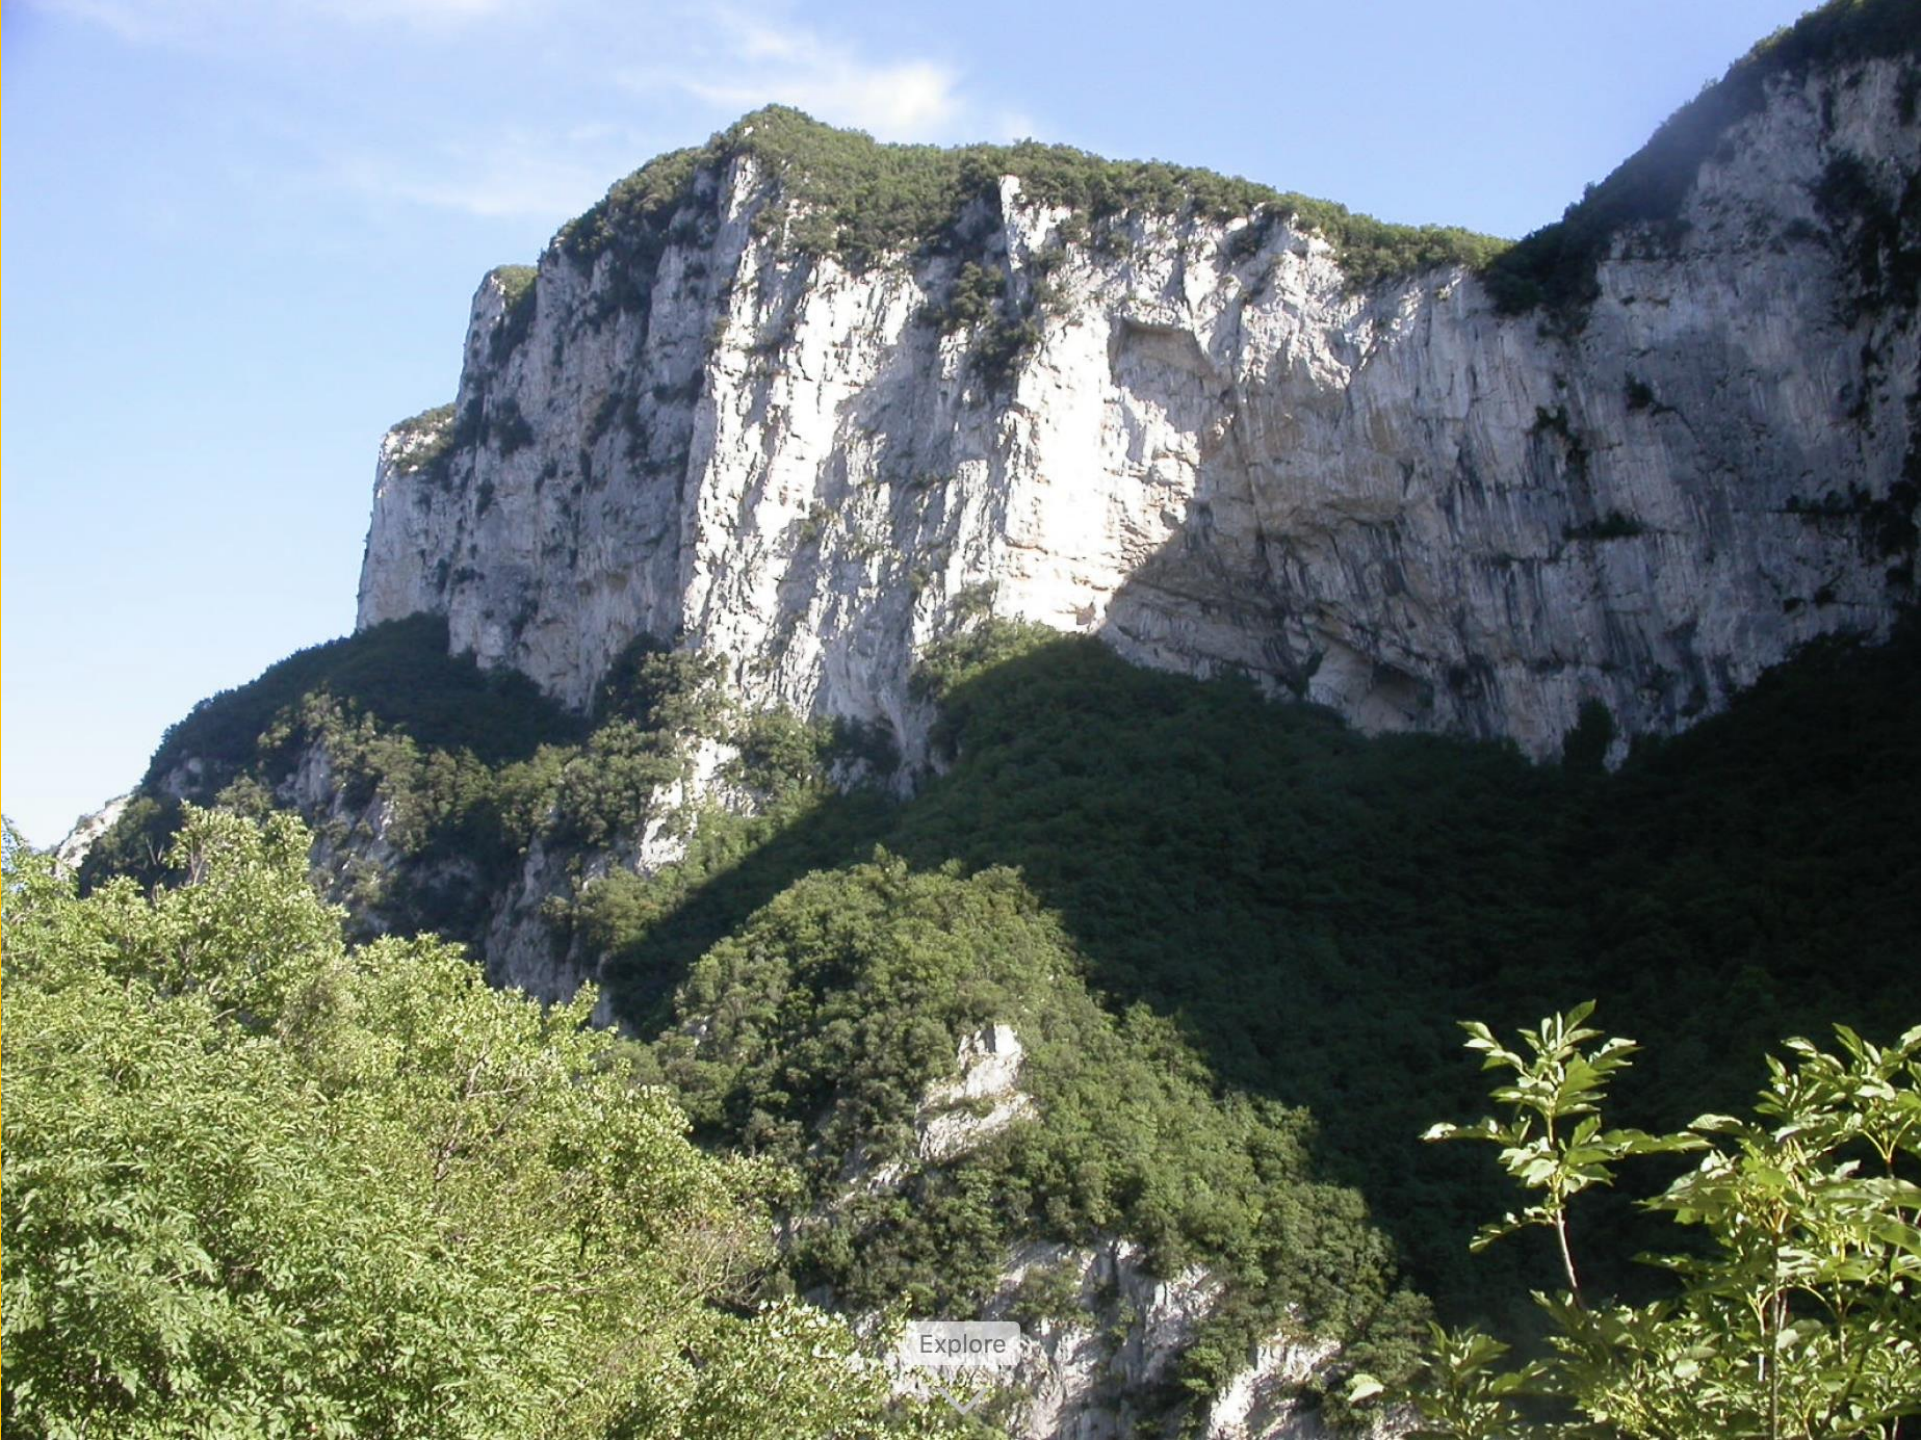

Explore

The caves are formed in the nearly pure limestones of the Calcare Massiccio formation

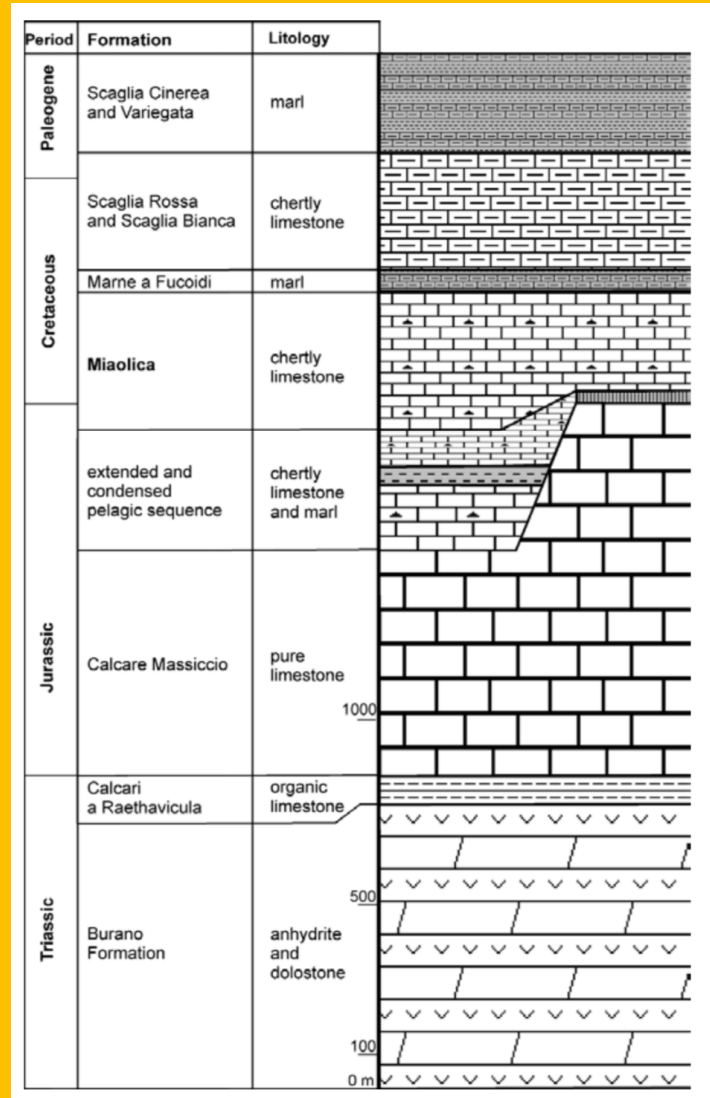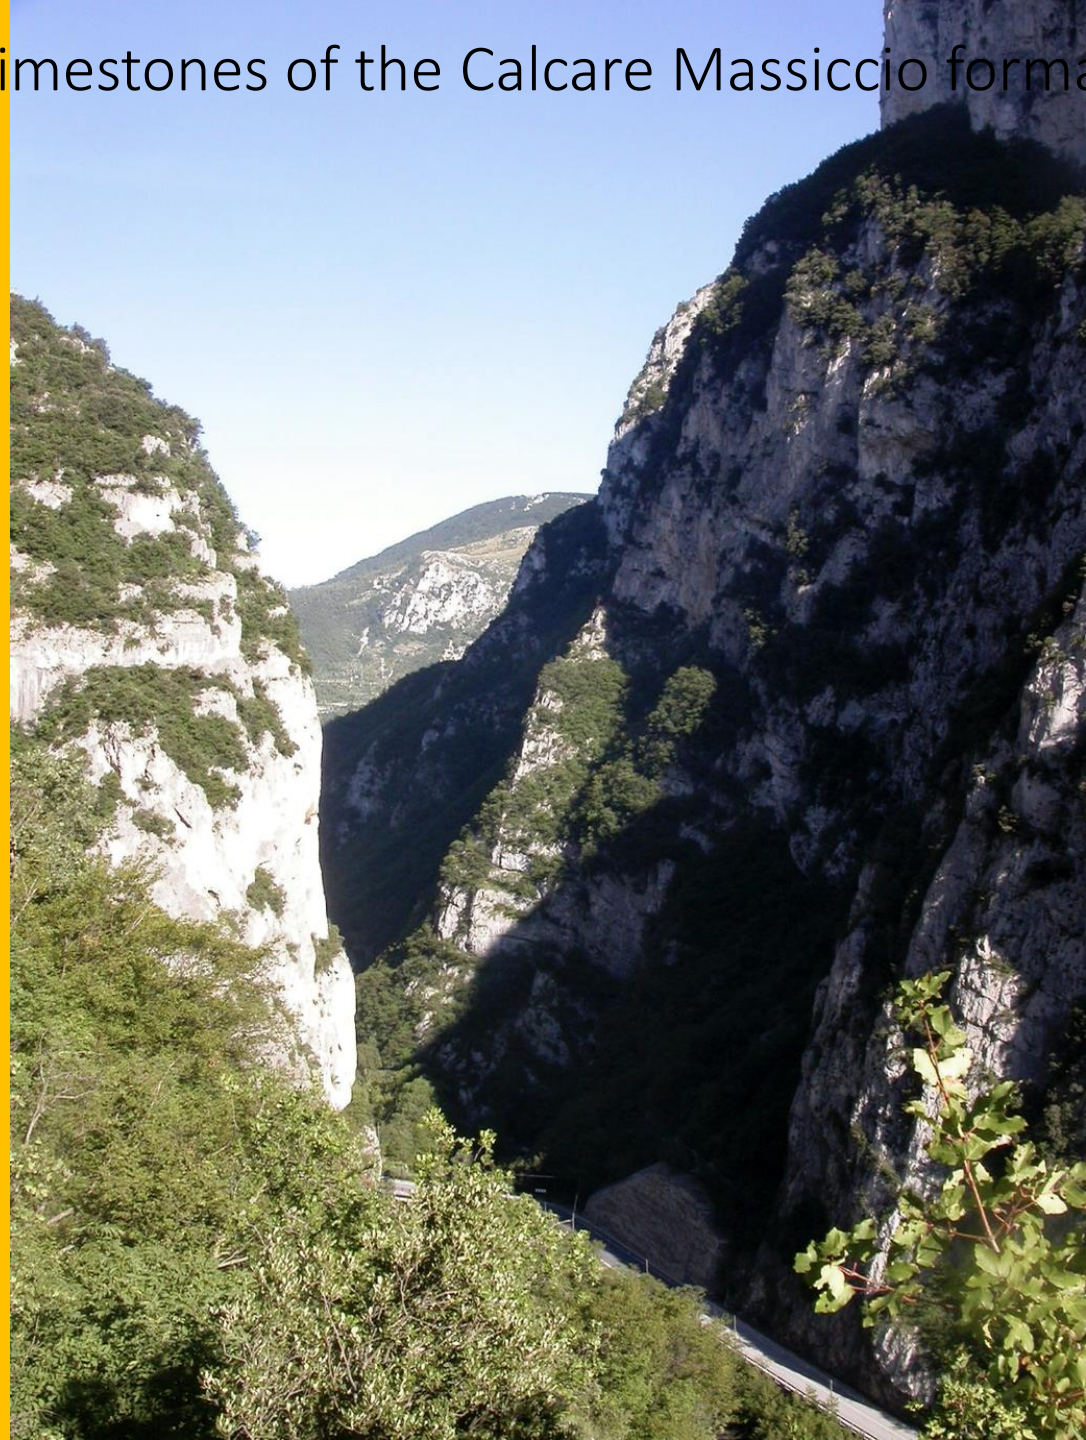

# Stop 1: Cave Springs

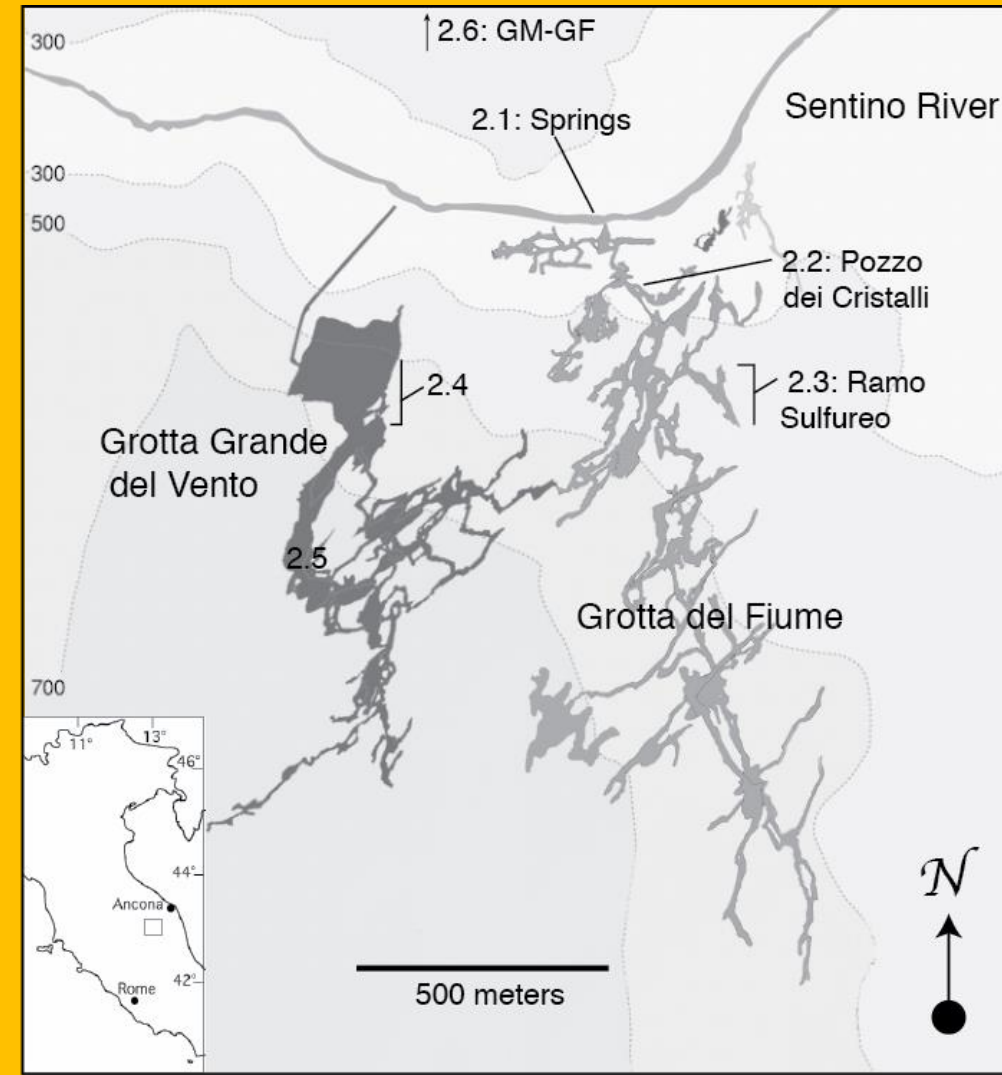

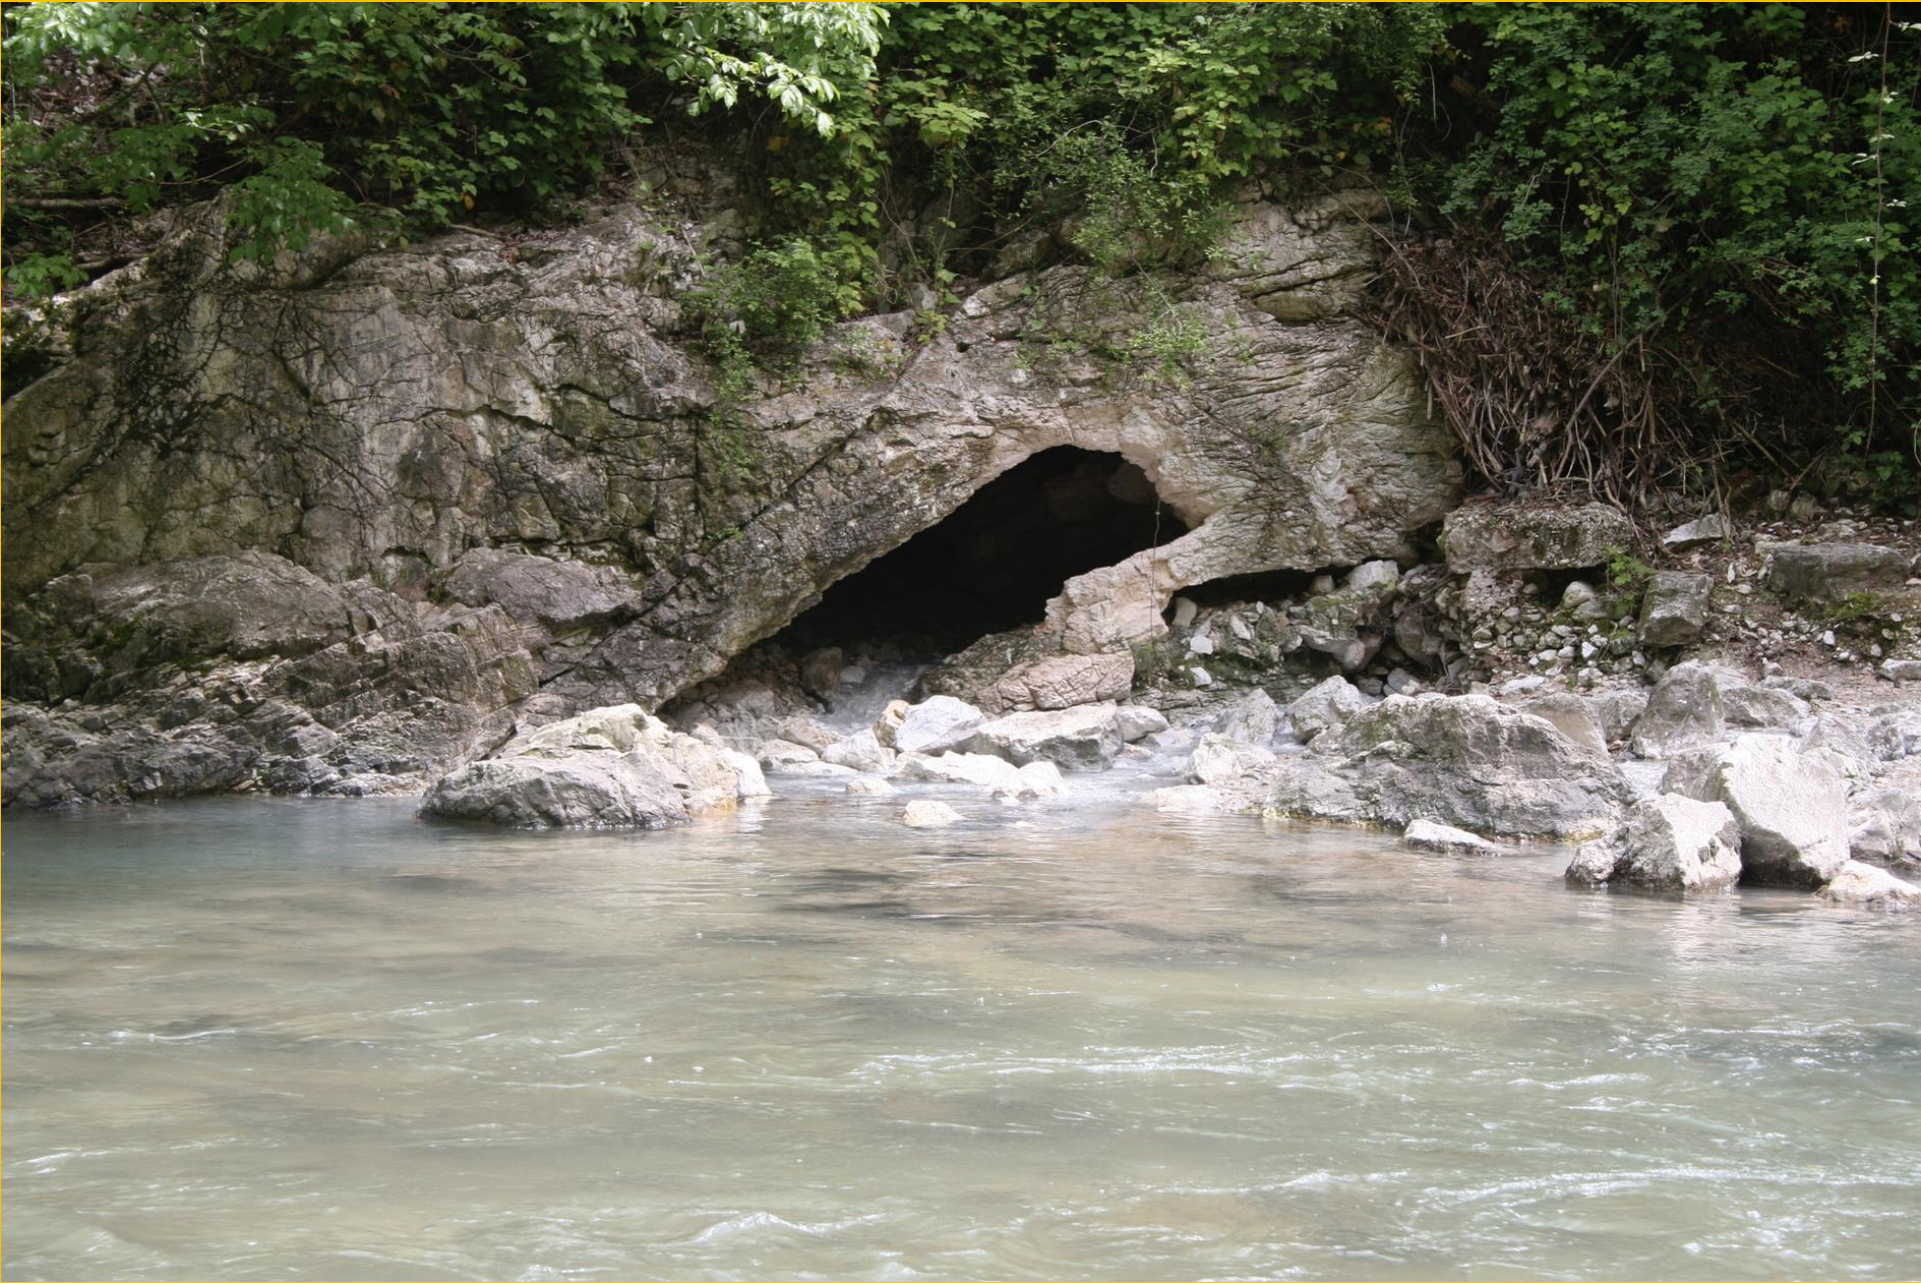

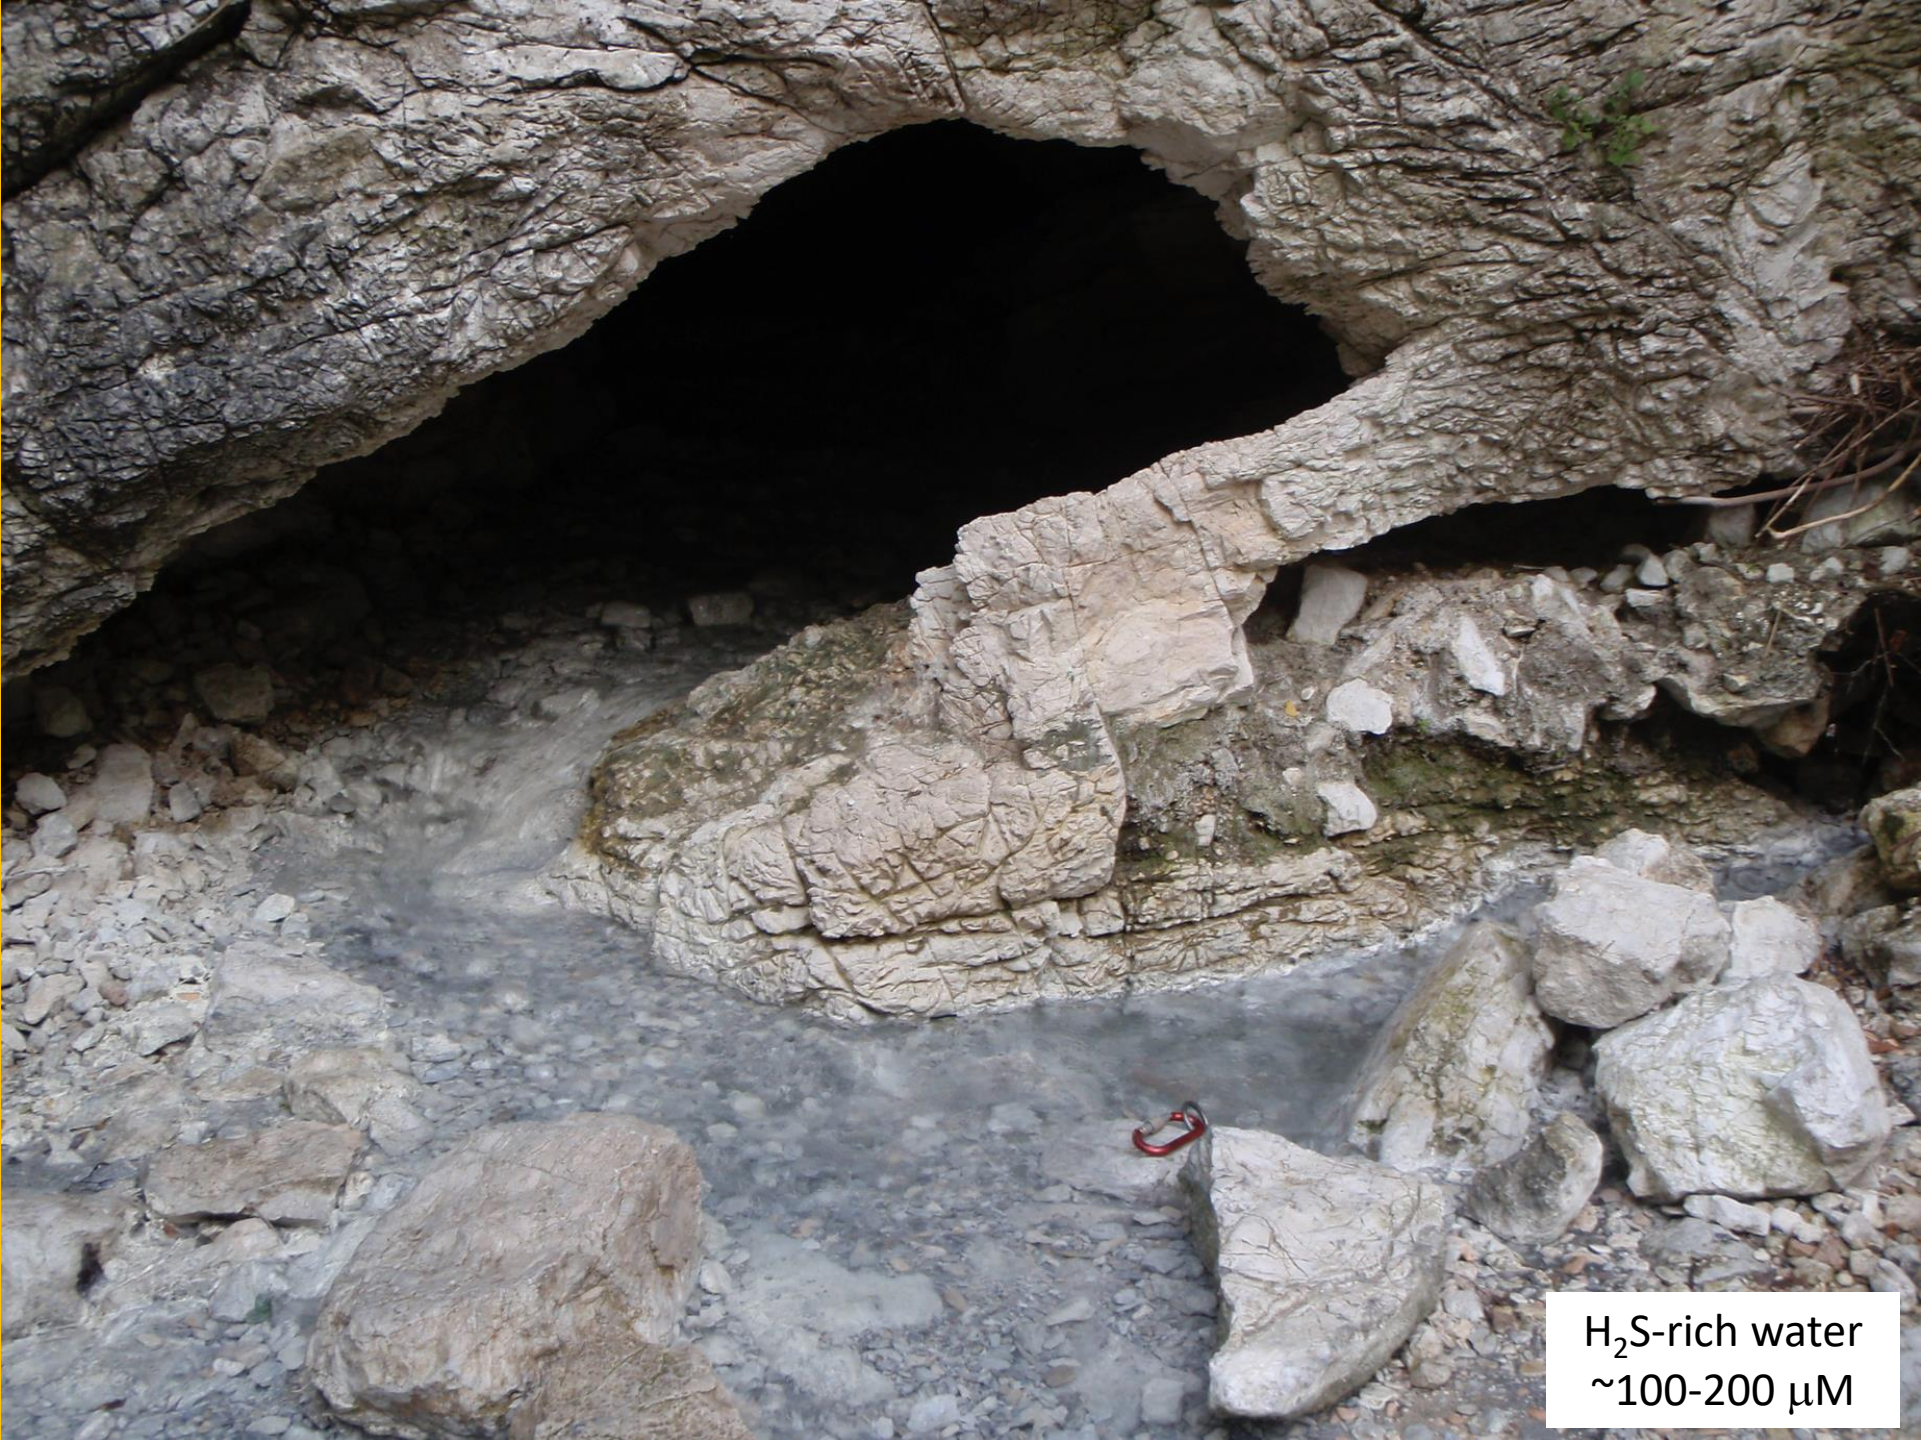

$\text{H}_2\text{S}$ -rich water  
~100-200  $\mu\text{M}$

In 2013, a massive flood destroyed the springs... But they have re-emerged in slightly different locations

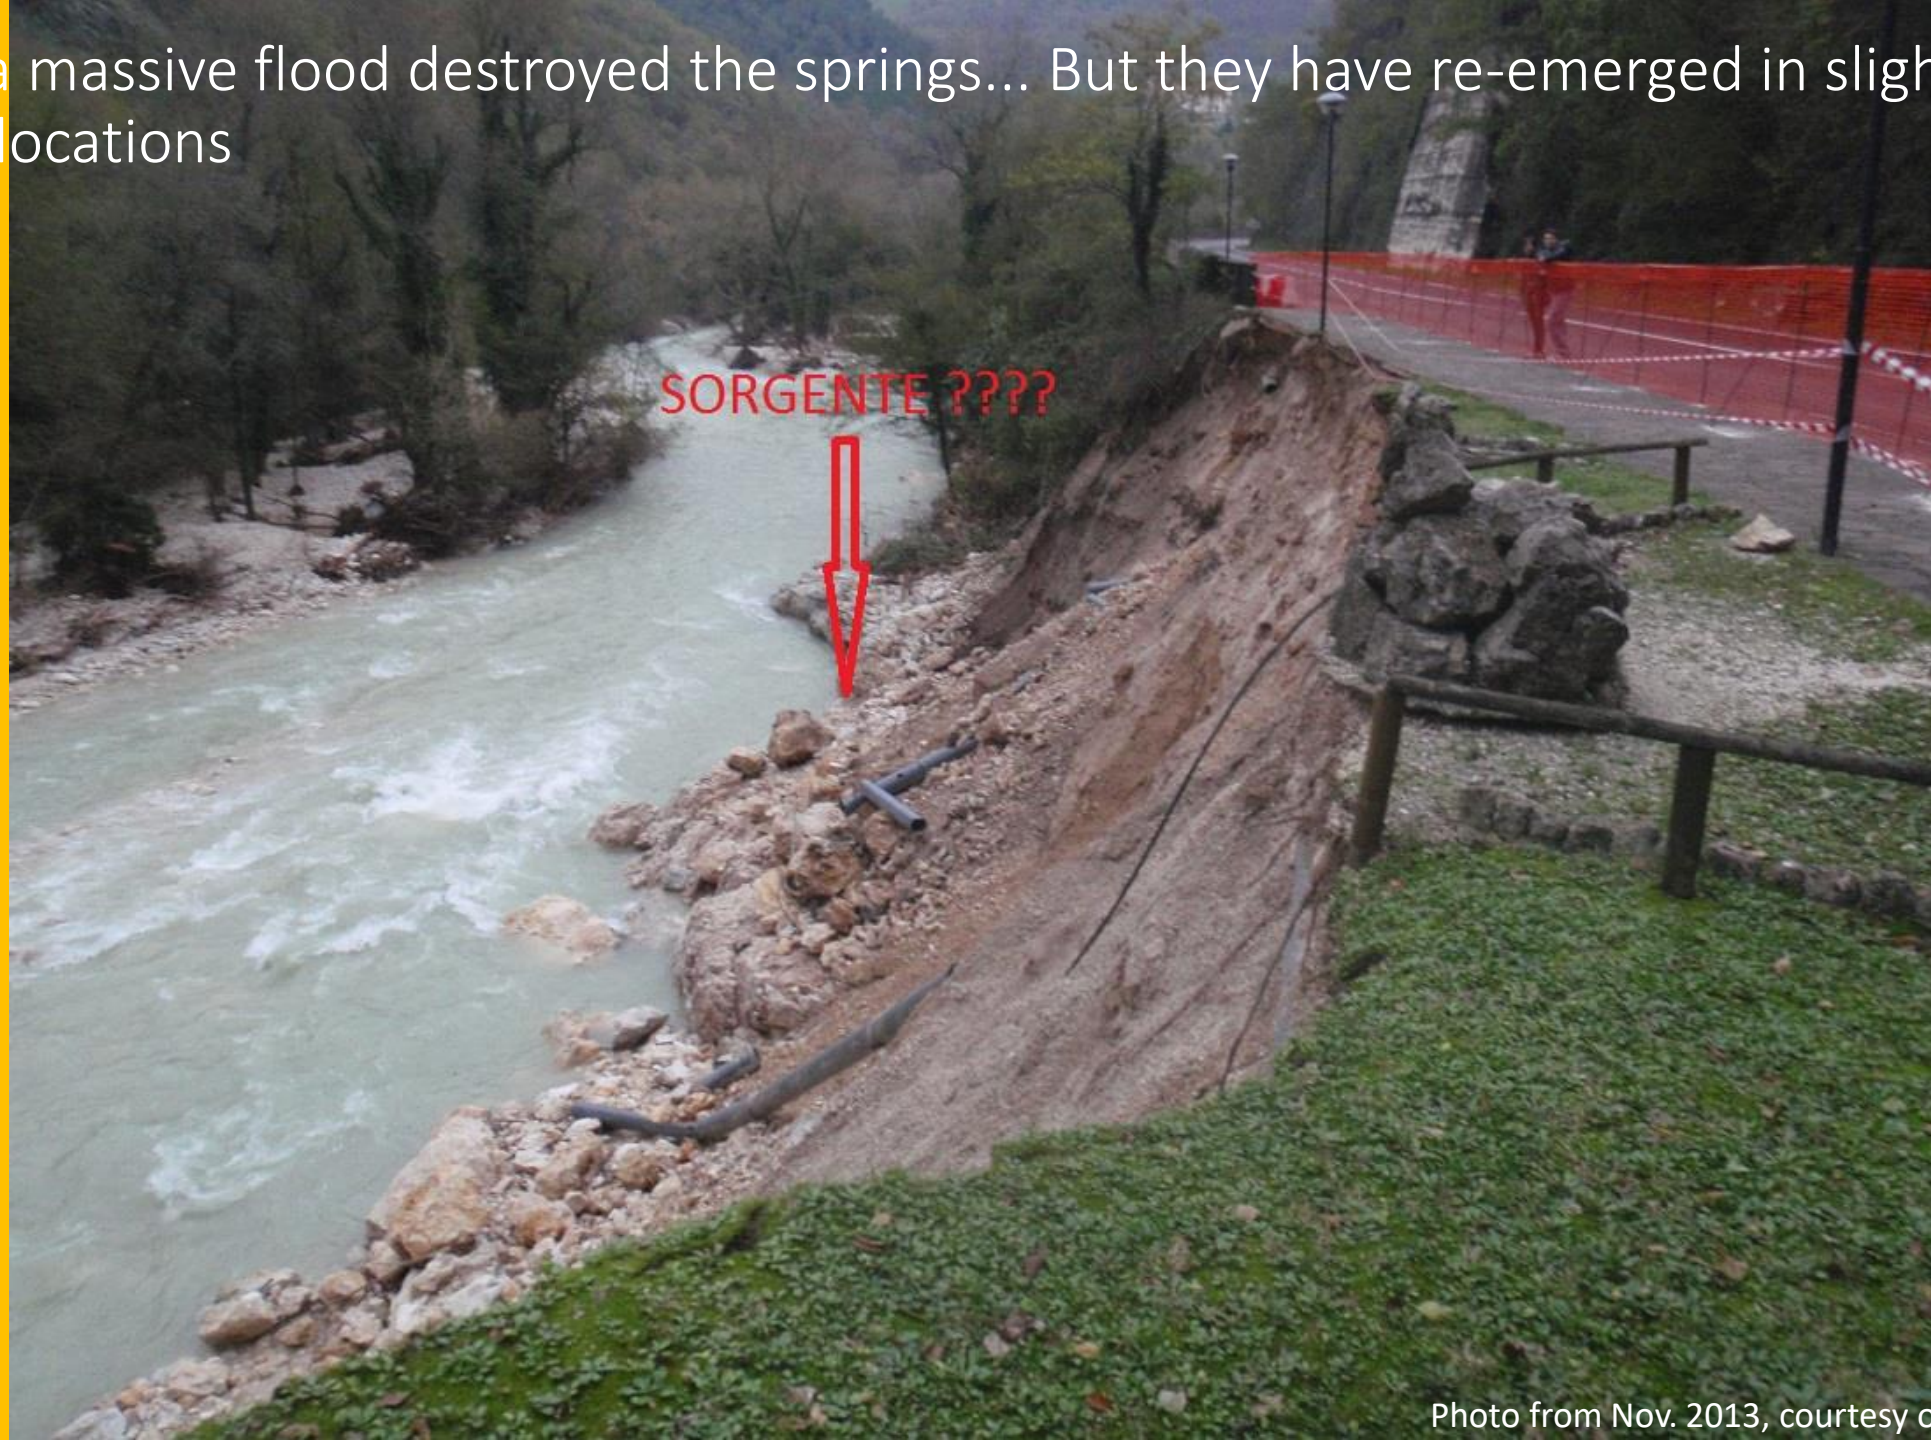

# Cristalli (PC) and Ramo Sulfureo (RS)

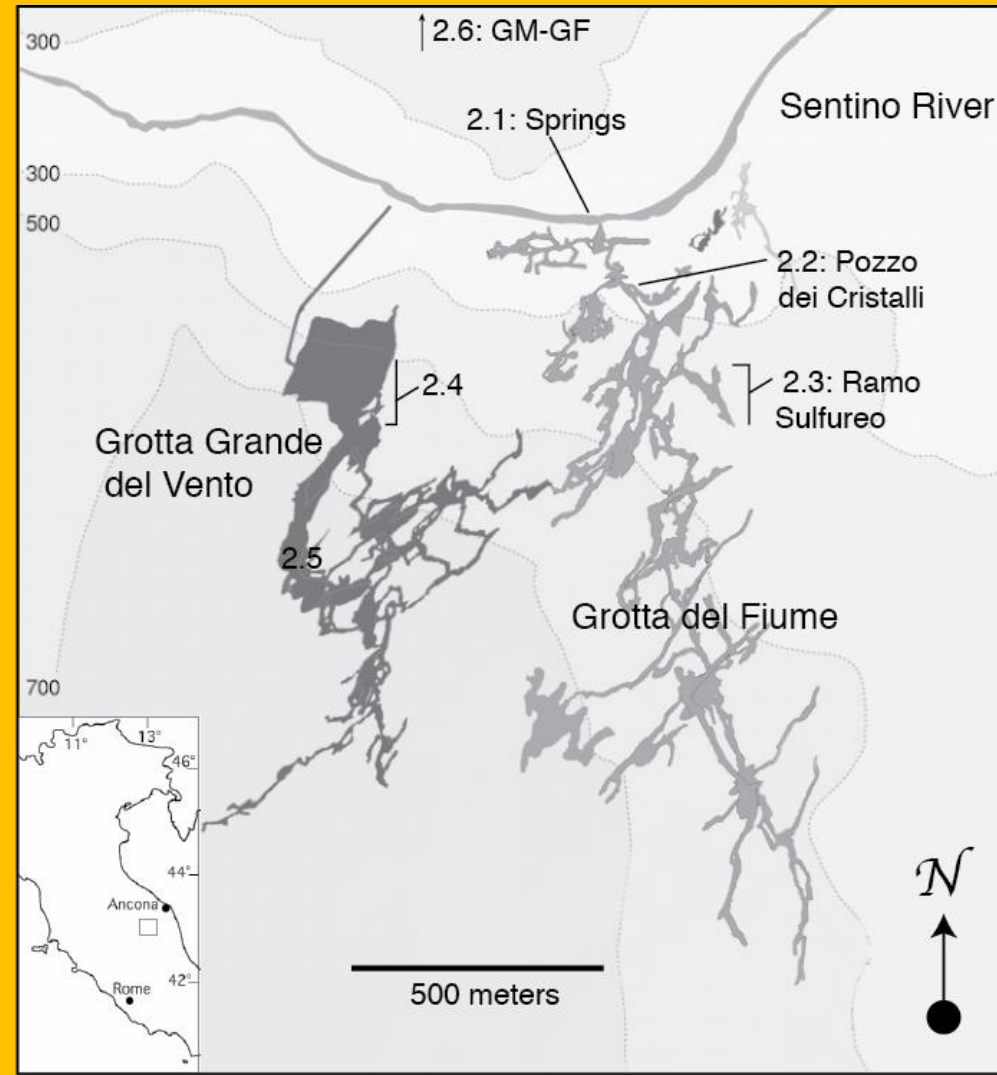

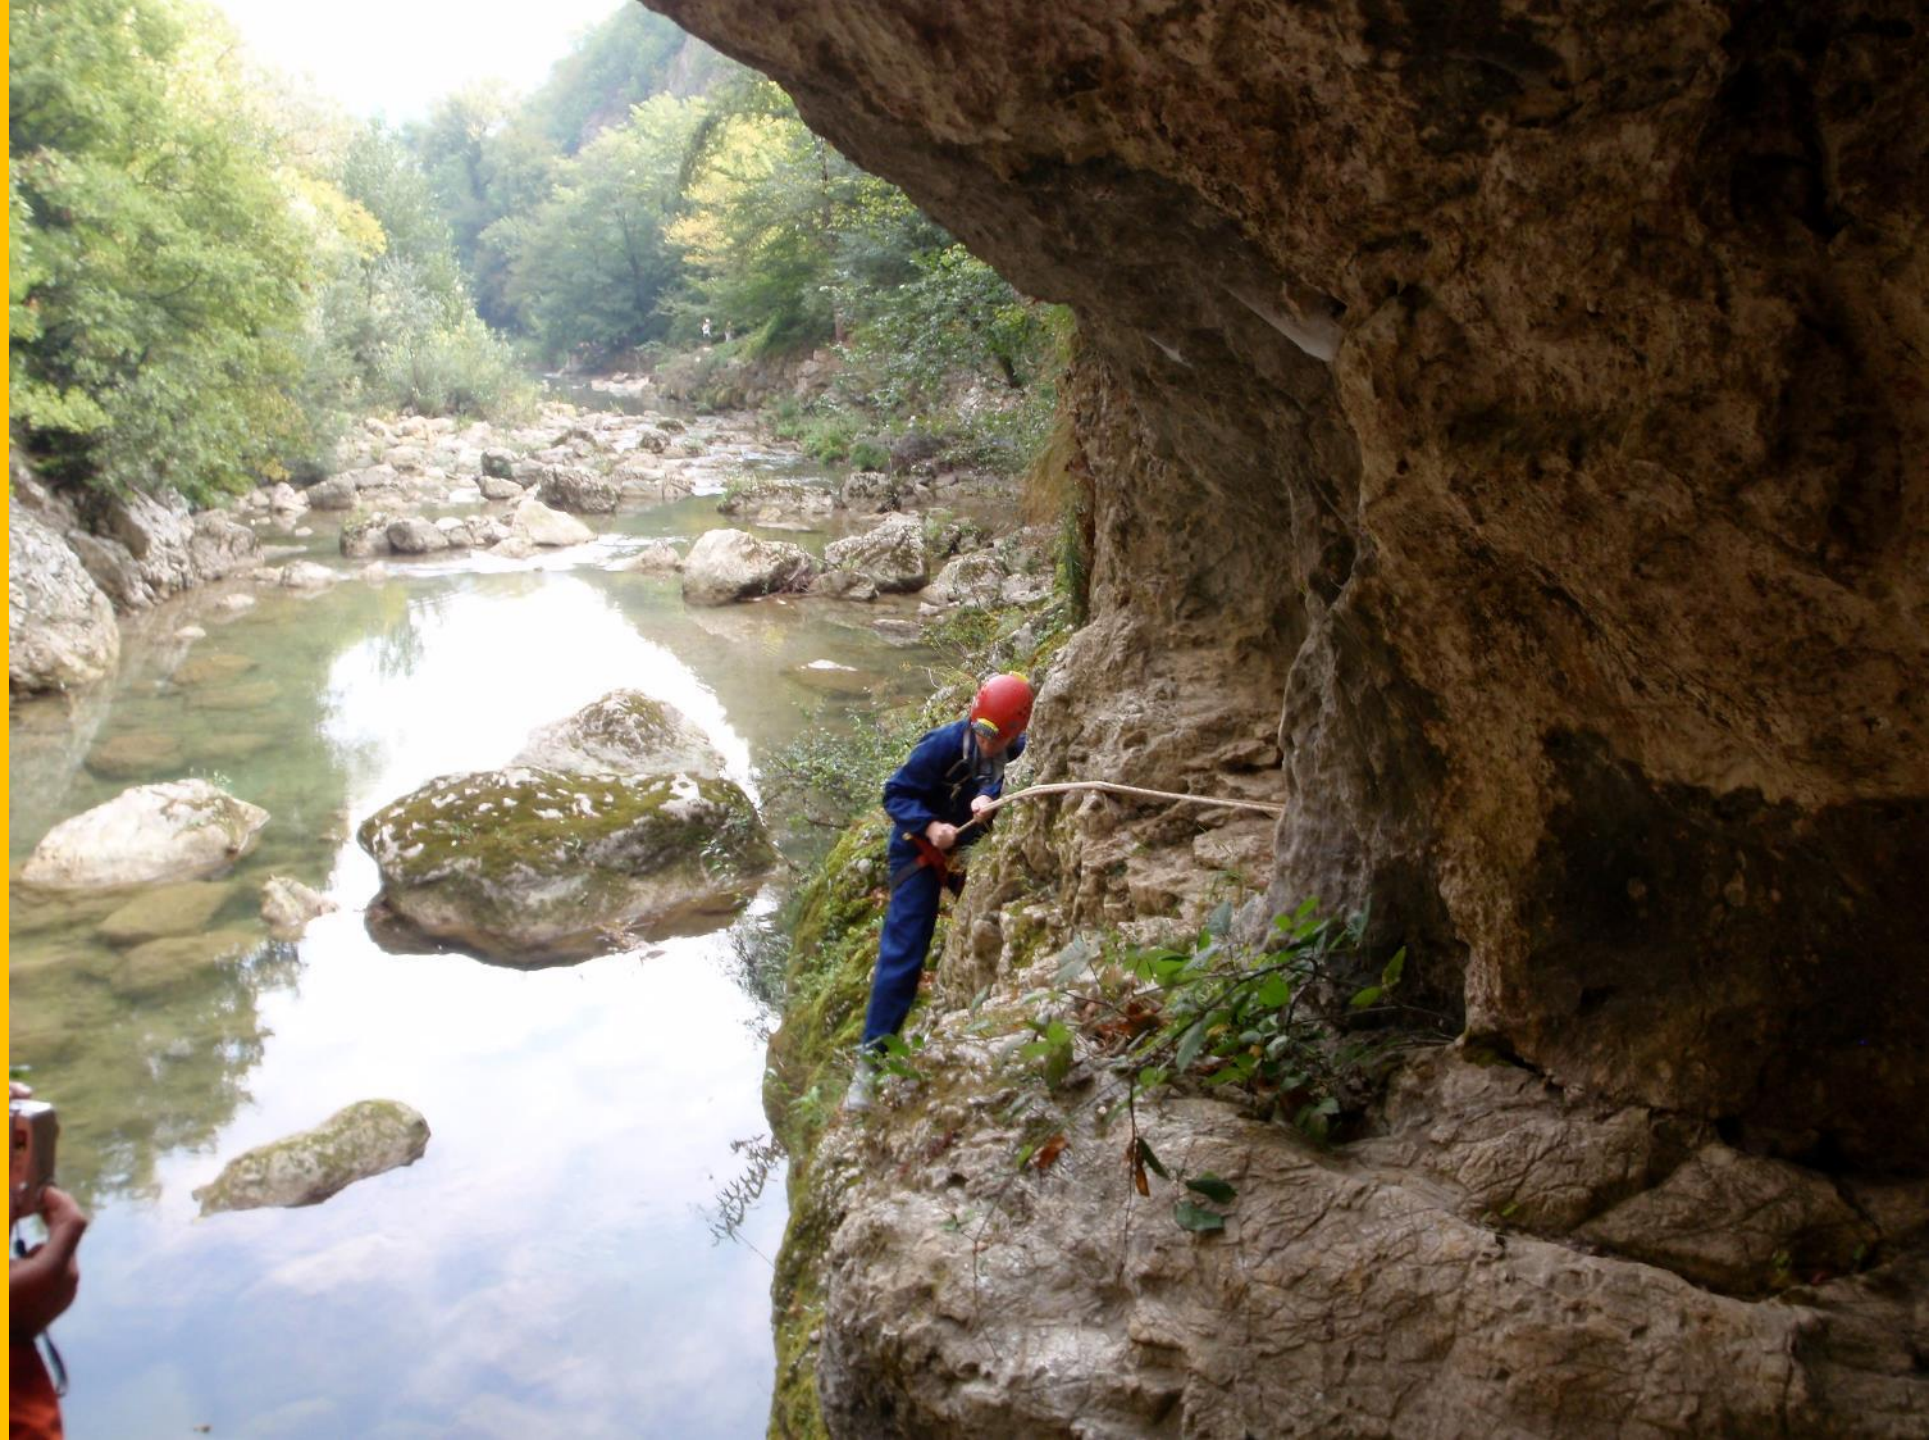

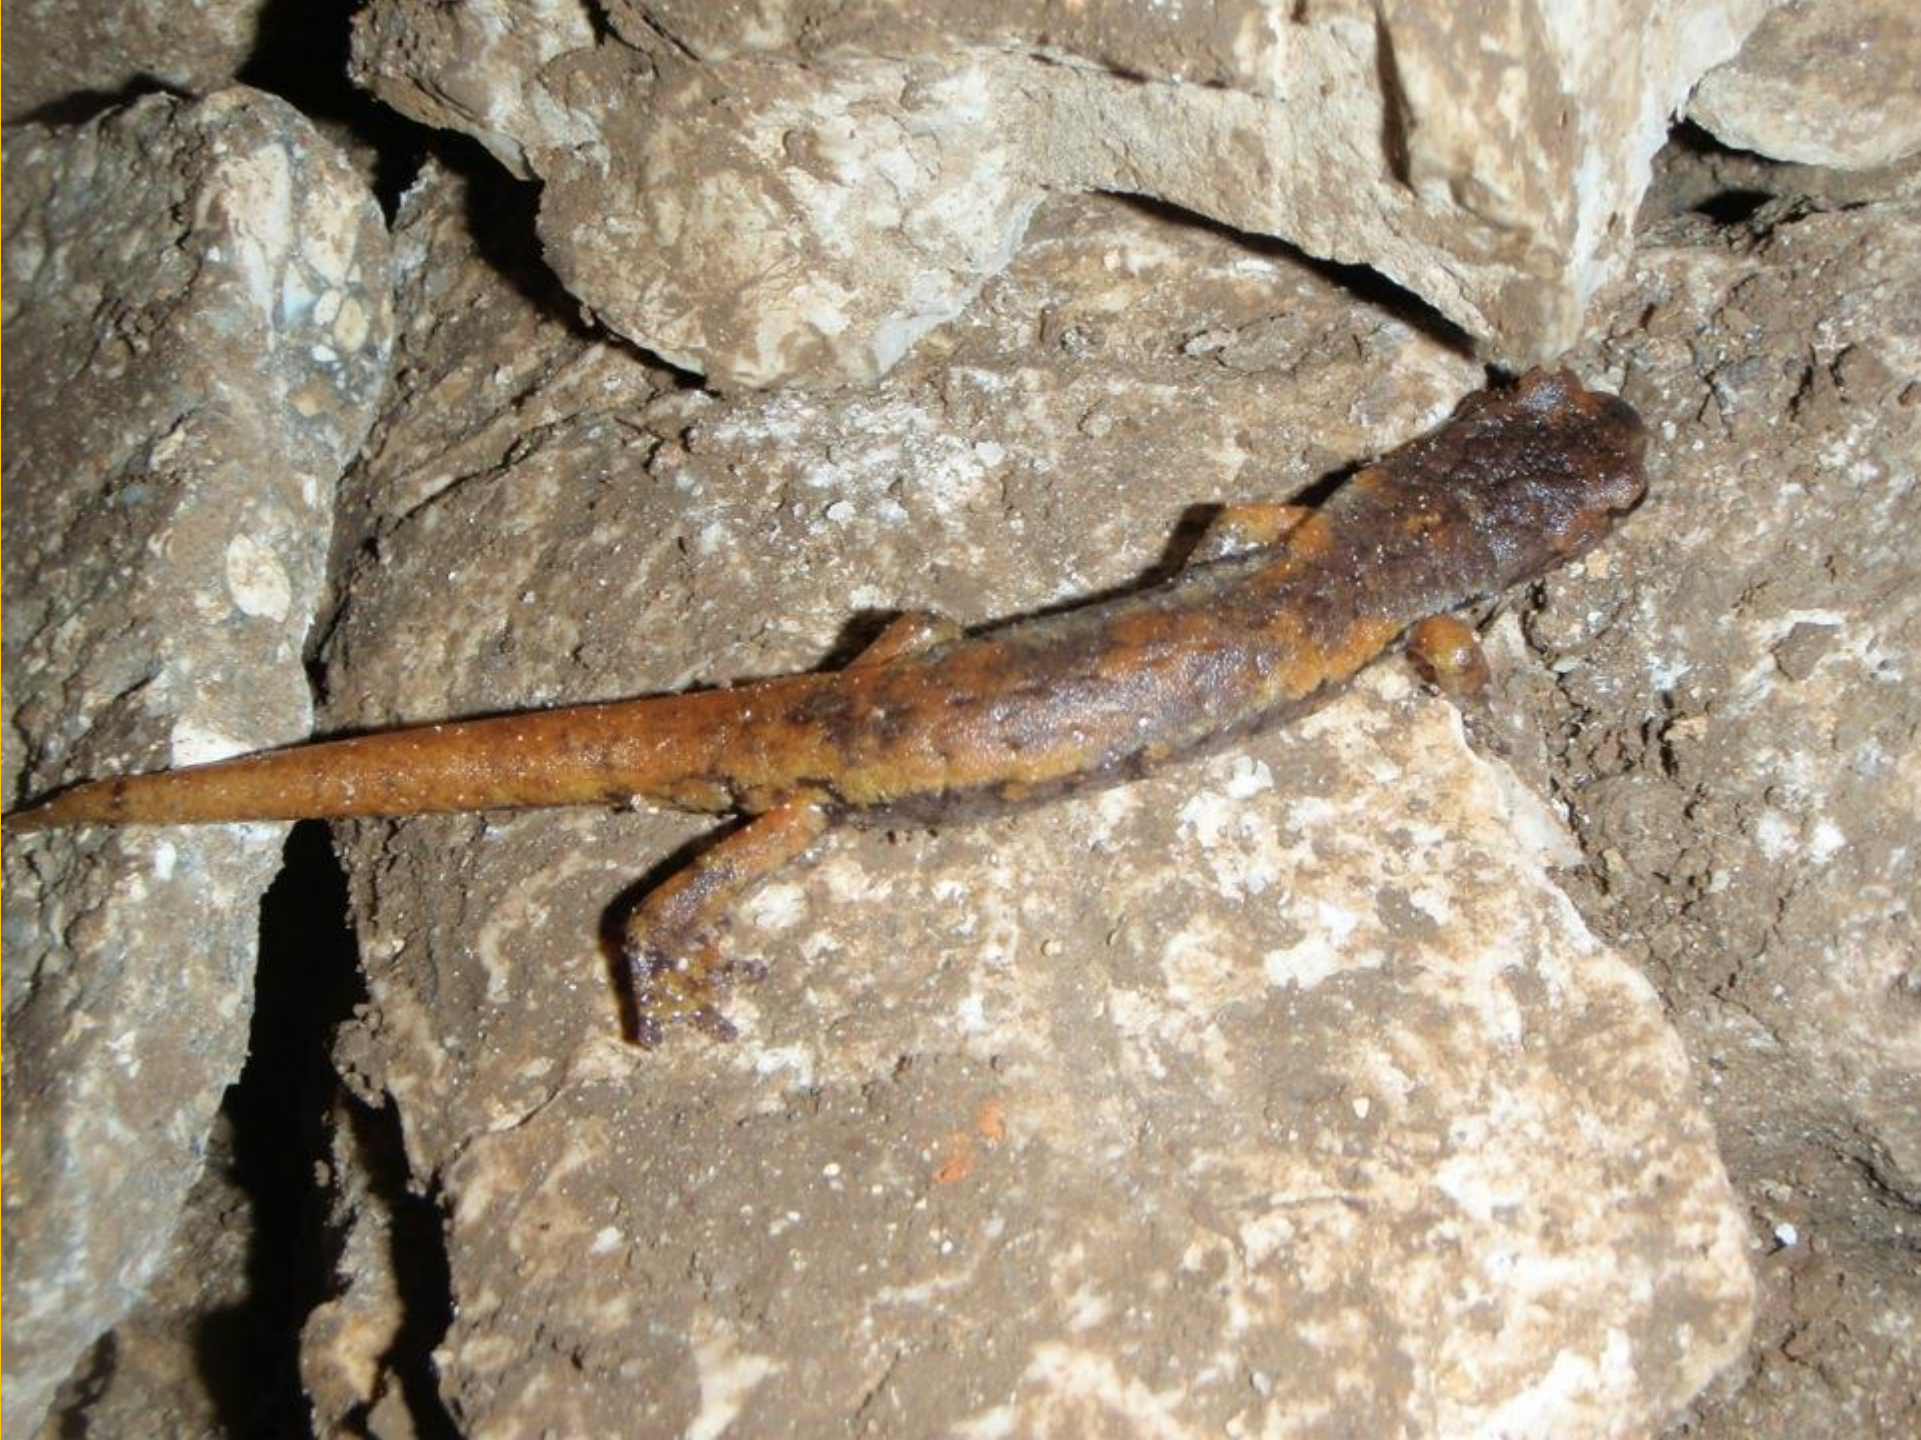

In Frasassi, near cave entrances, biological activity is dependent on allochthonous organic matter from surface sources

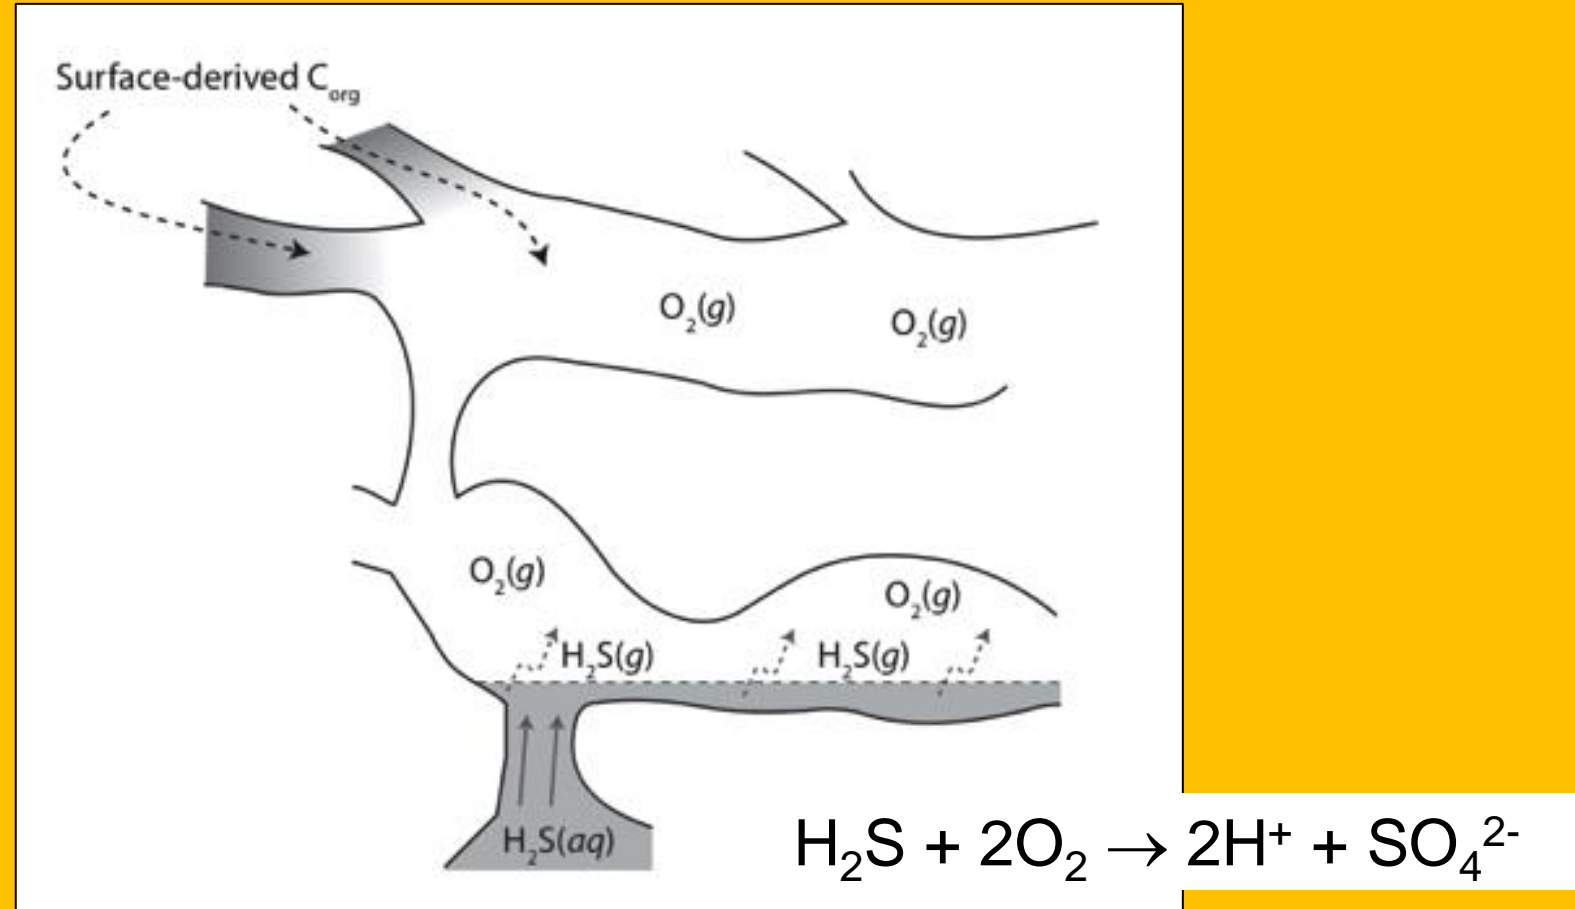

A robust chemosynthetic ecosystem occurs in the lower levels where chemical energy is plentiful

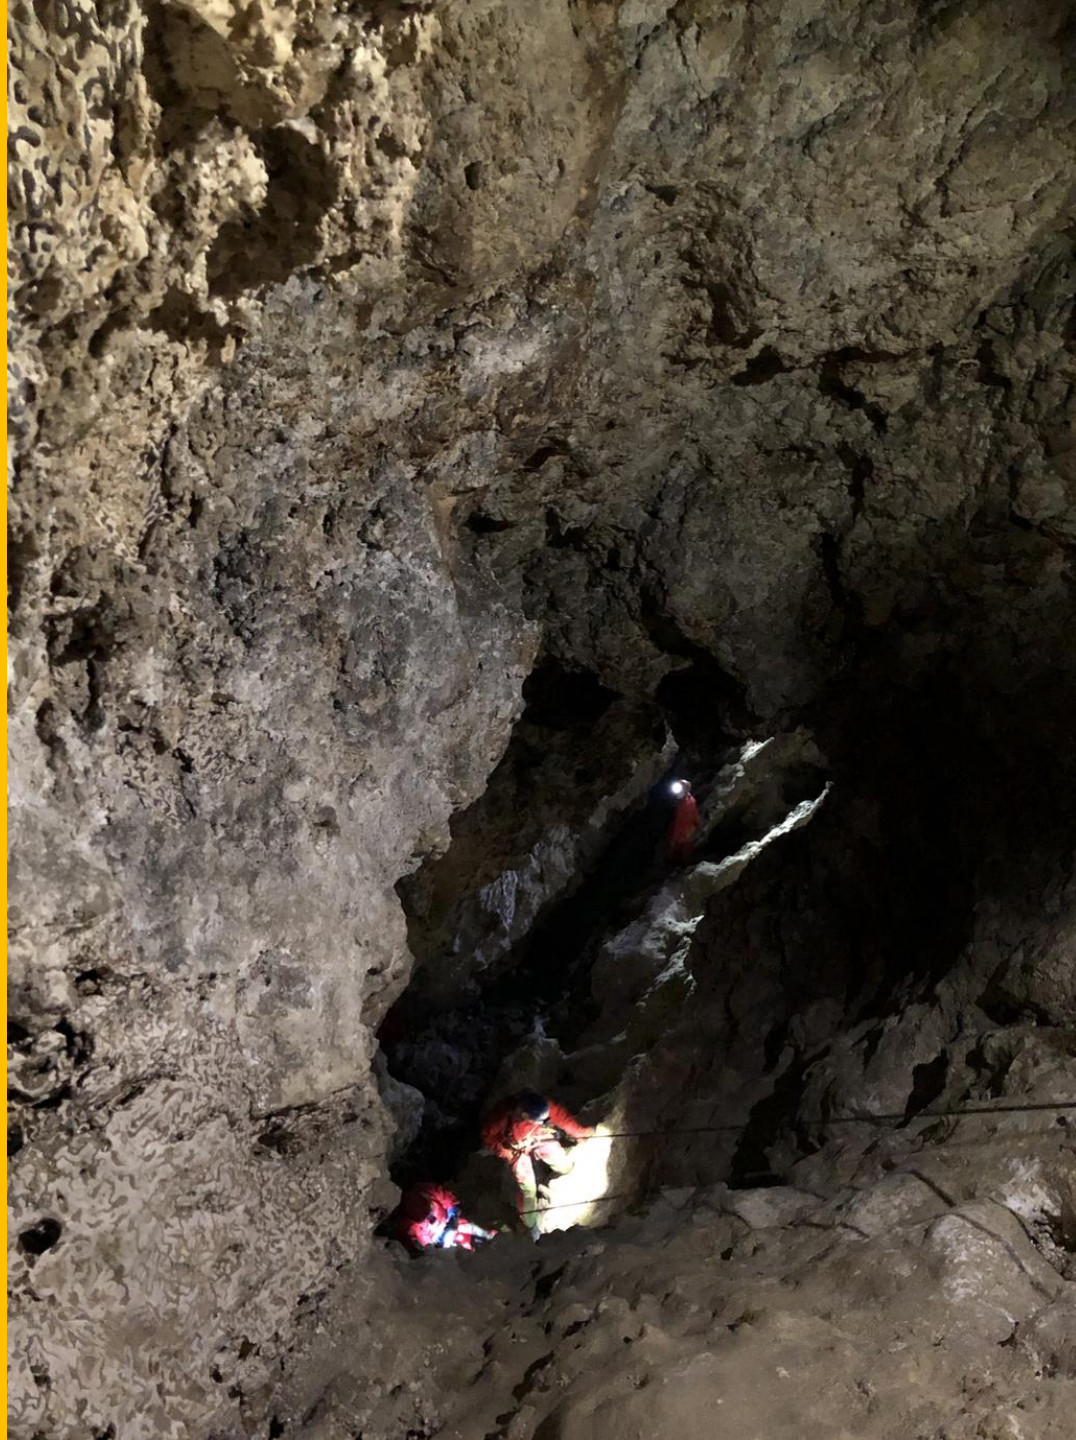

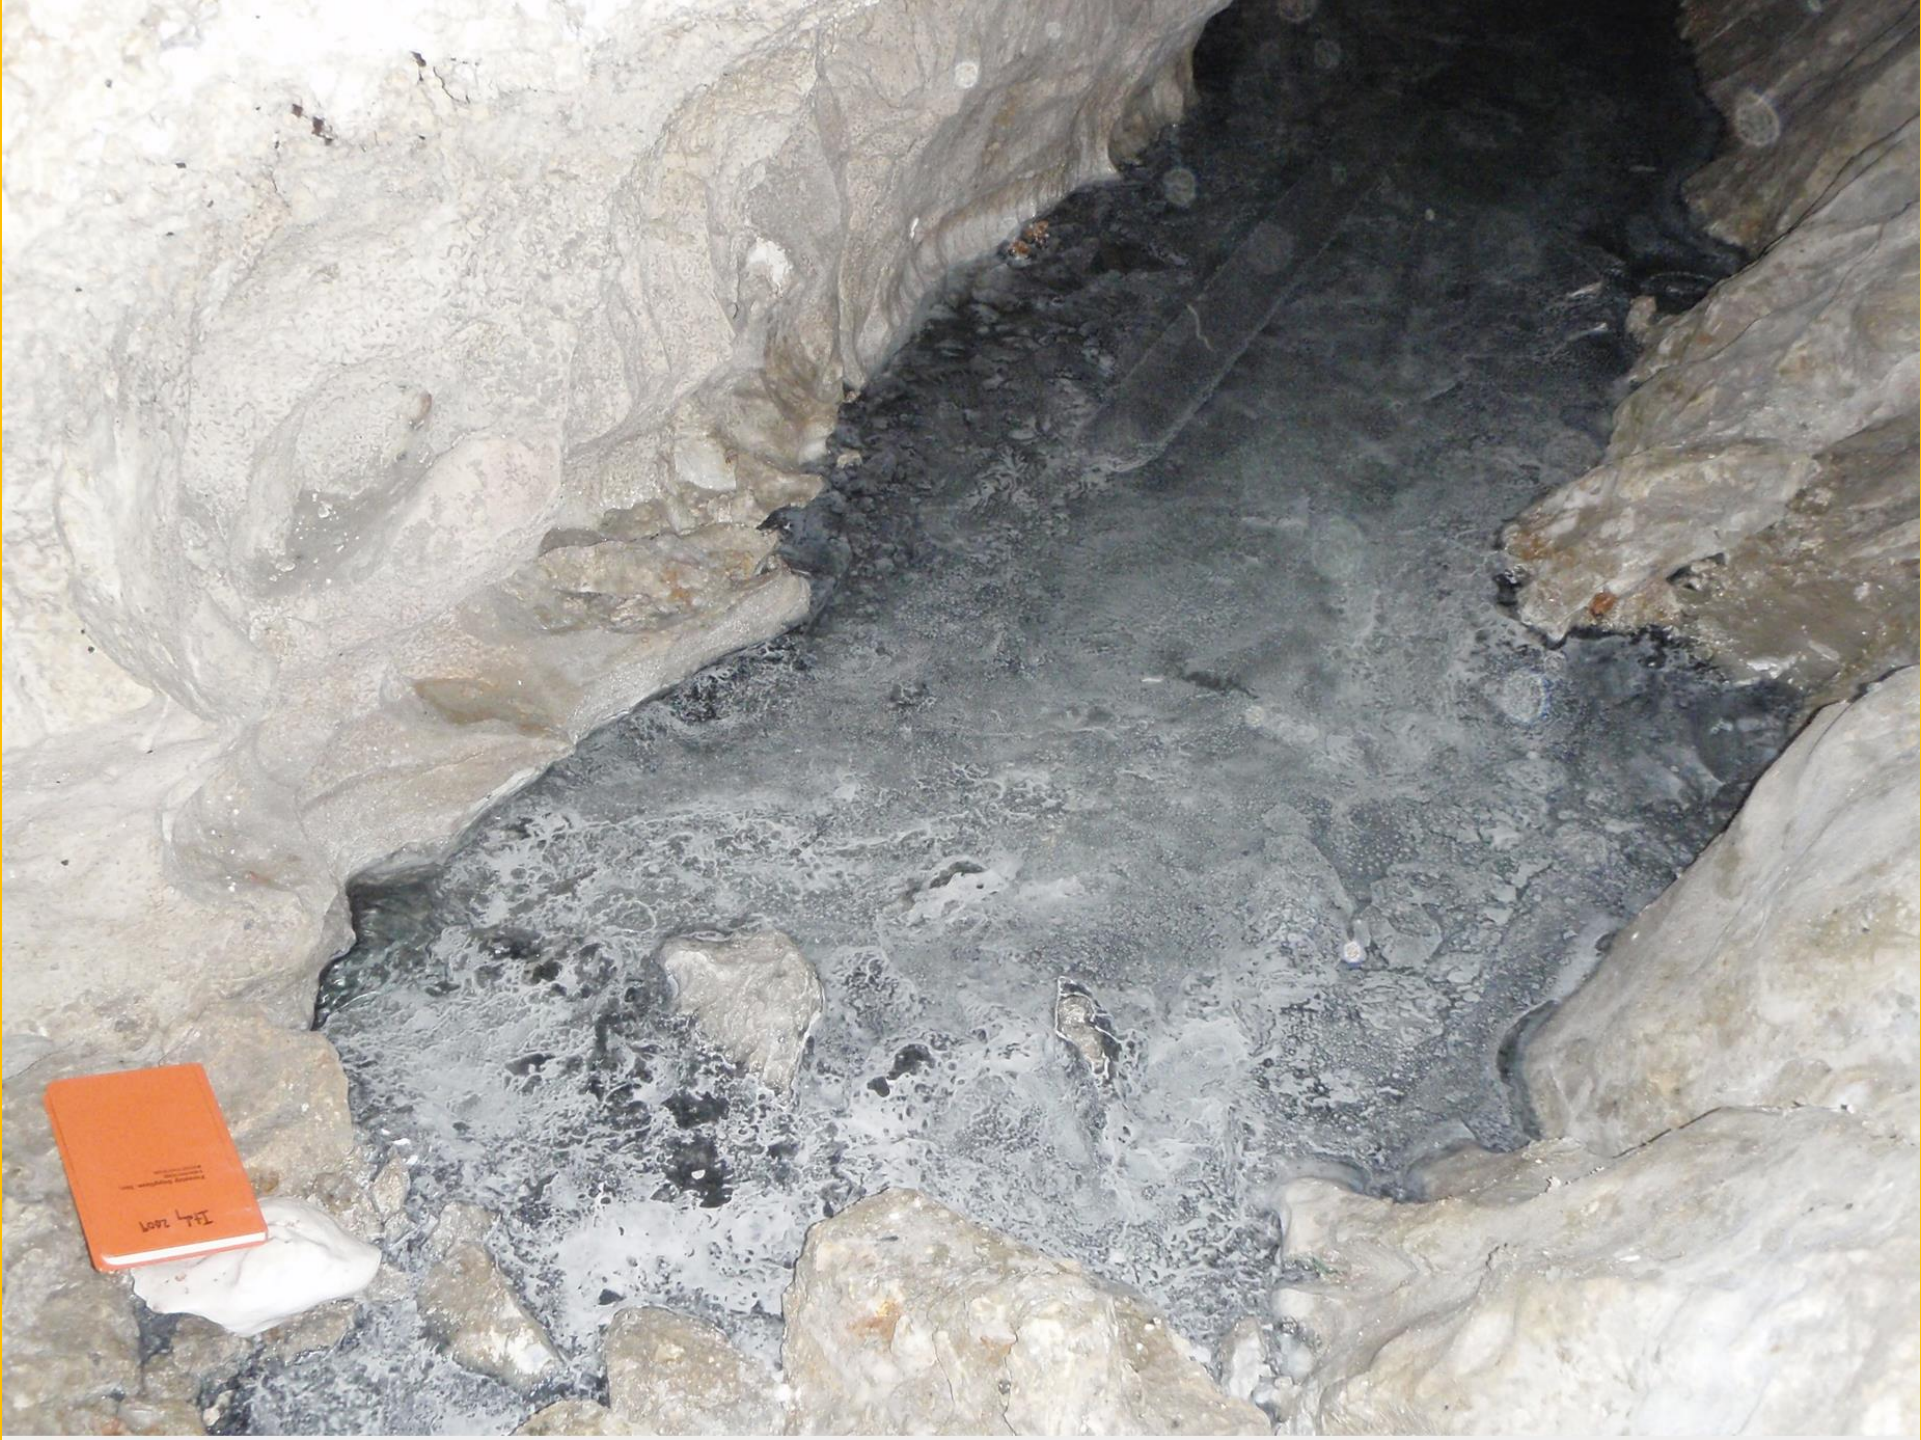

Sulfidic streams are filled with white microbial mats created by sulfide-oxidizing bacteria

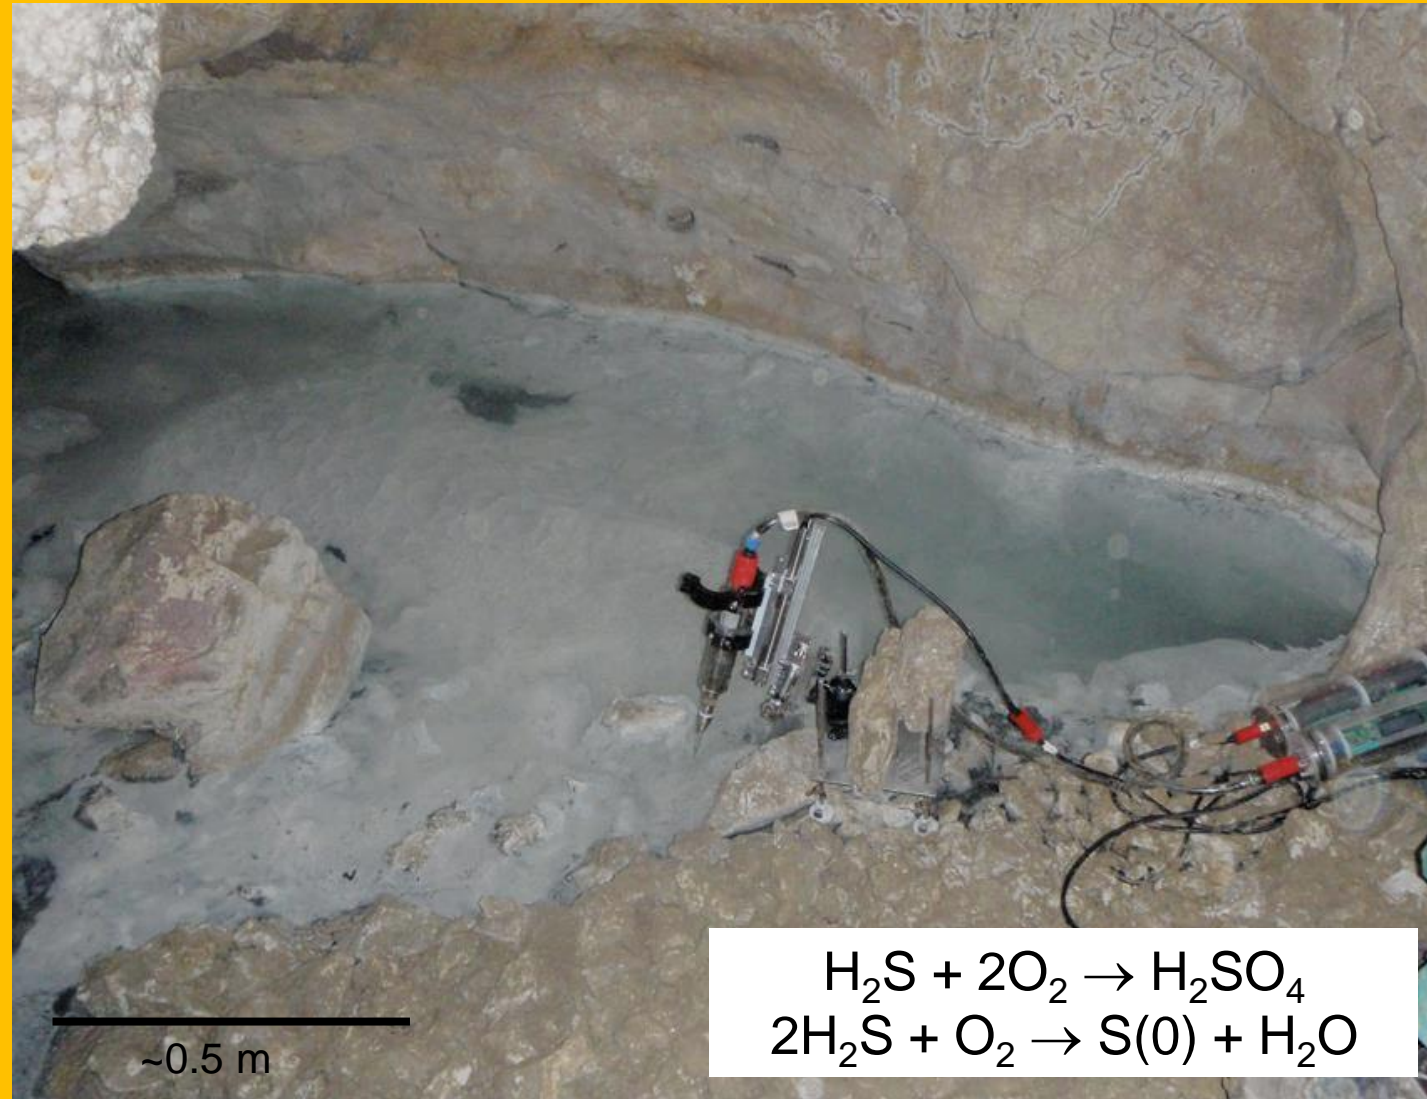

Sulfidic streams are filled with white microbial mats created by sulfide-oxidizing bacteria

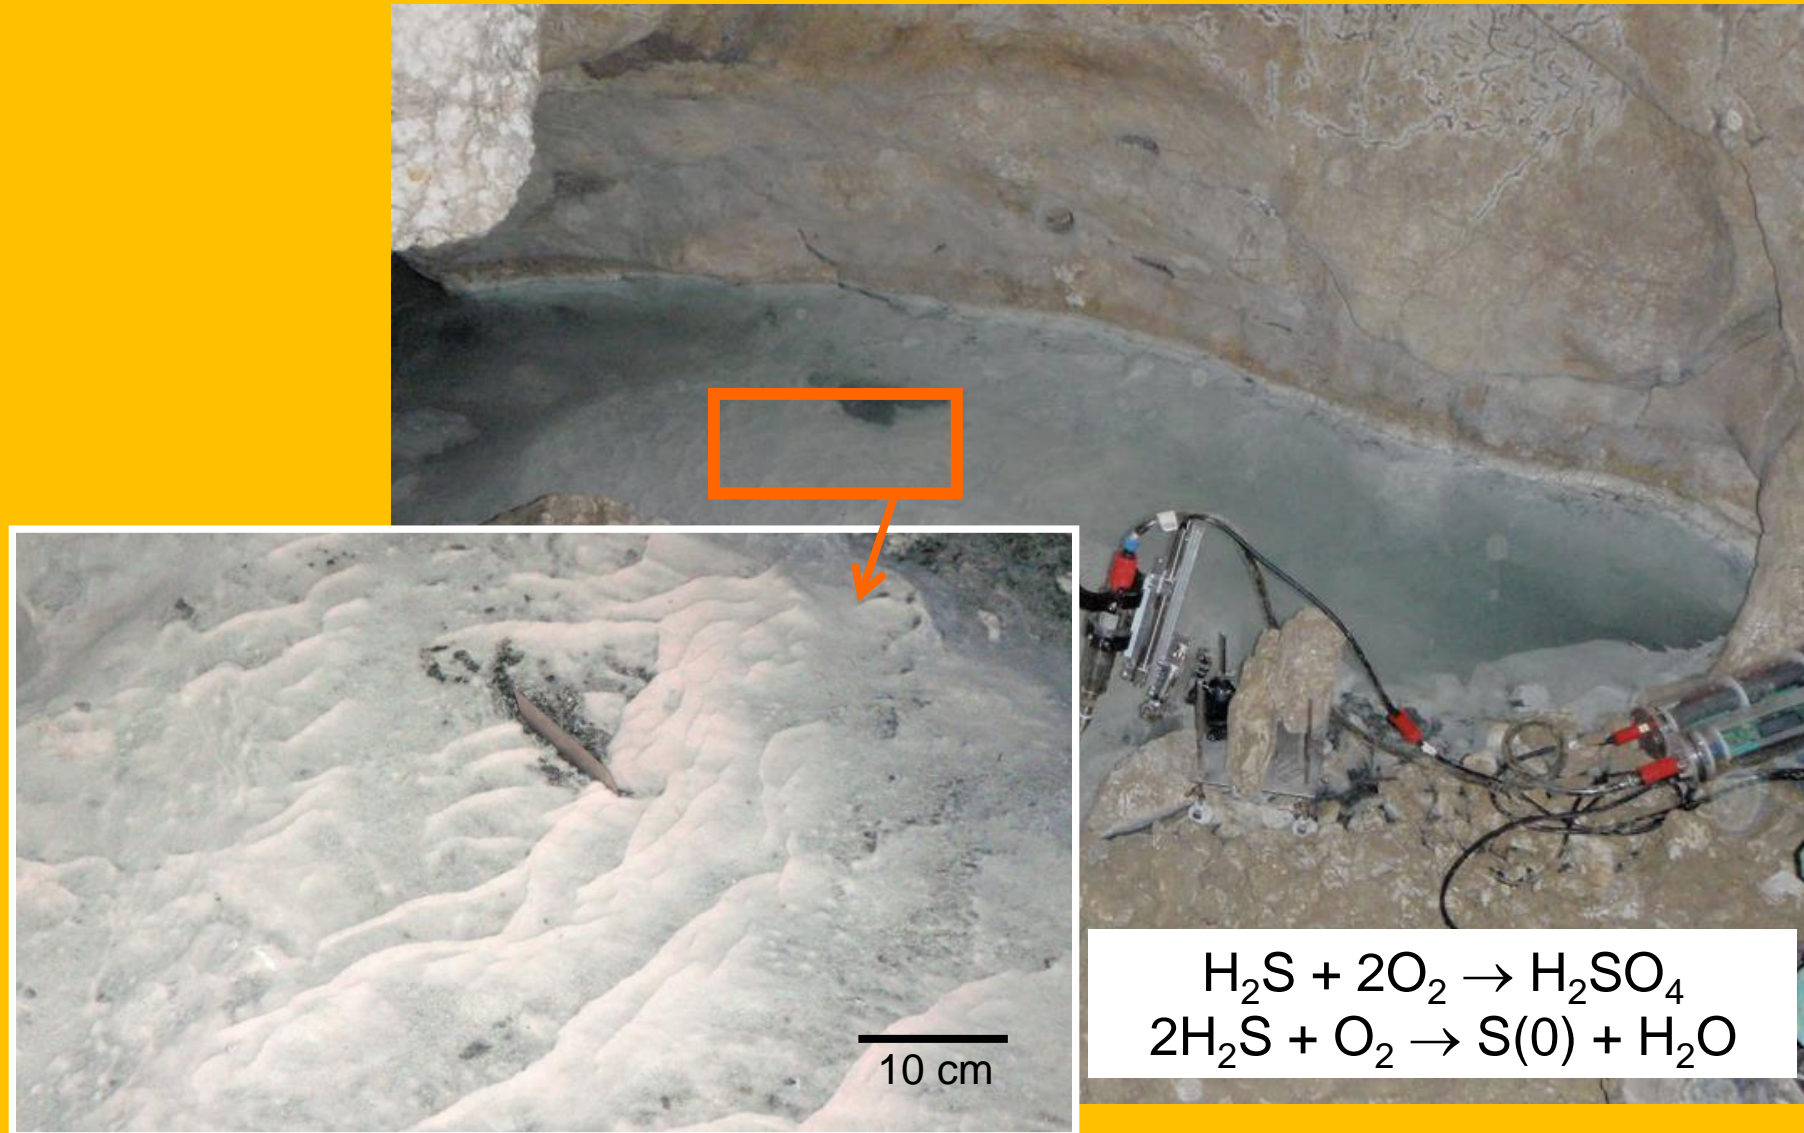

Sulfidic streams are filled with white microbial mats created by sulfide-oxidizing bacteria

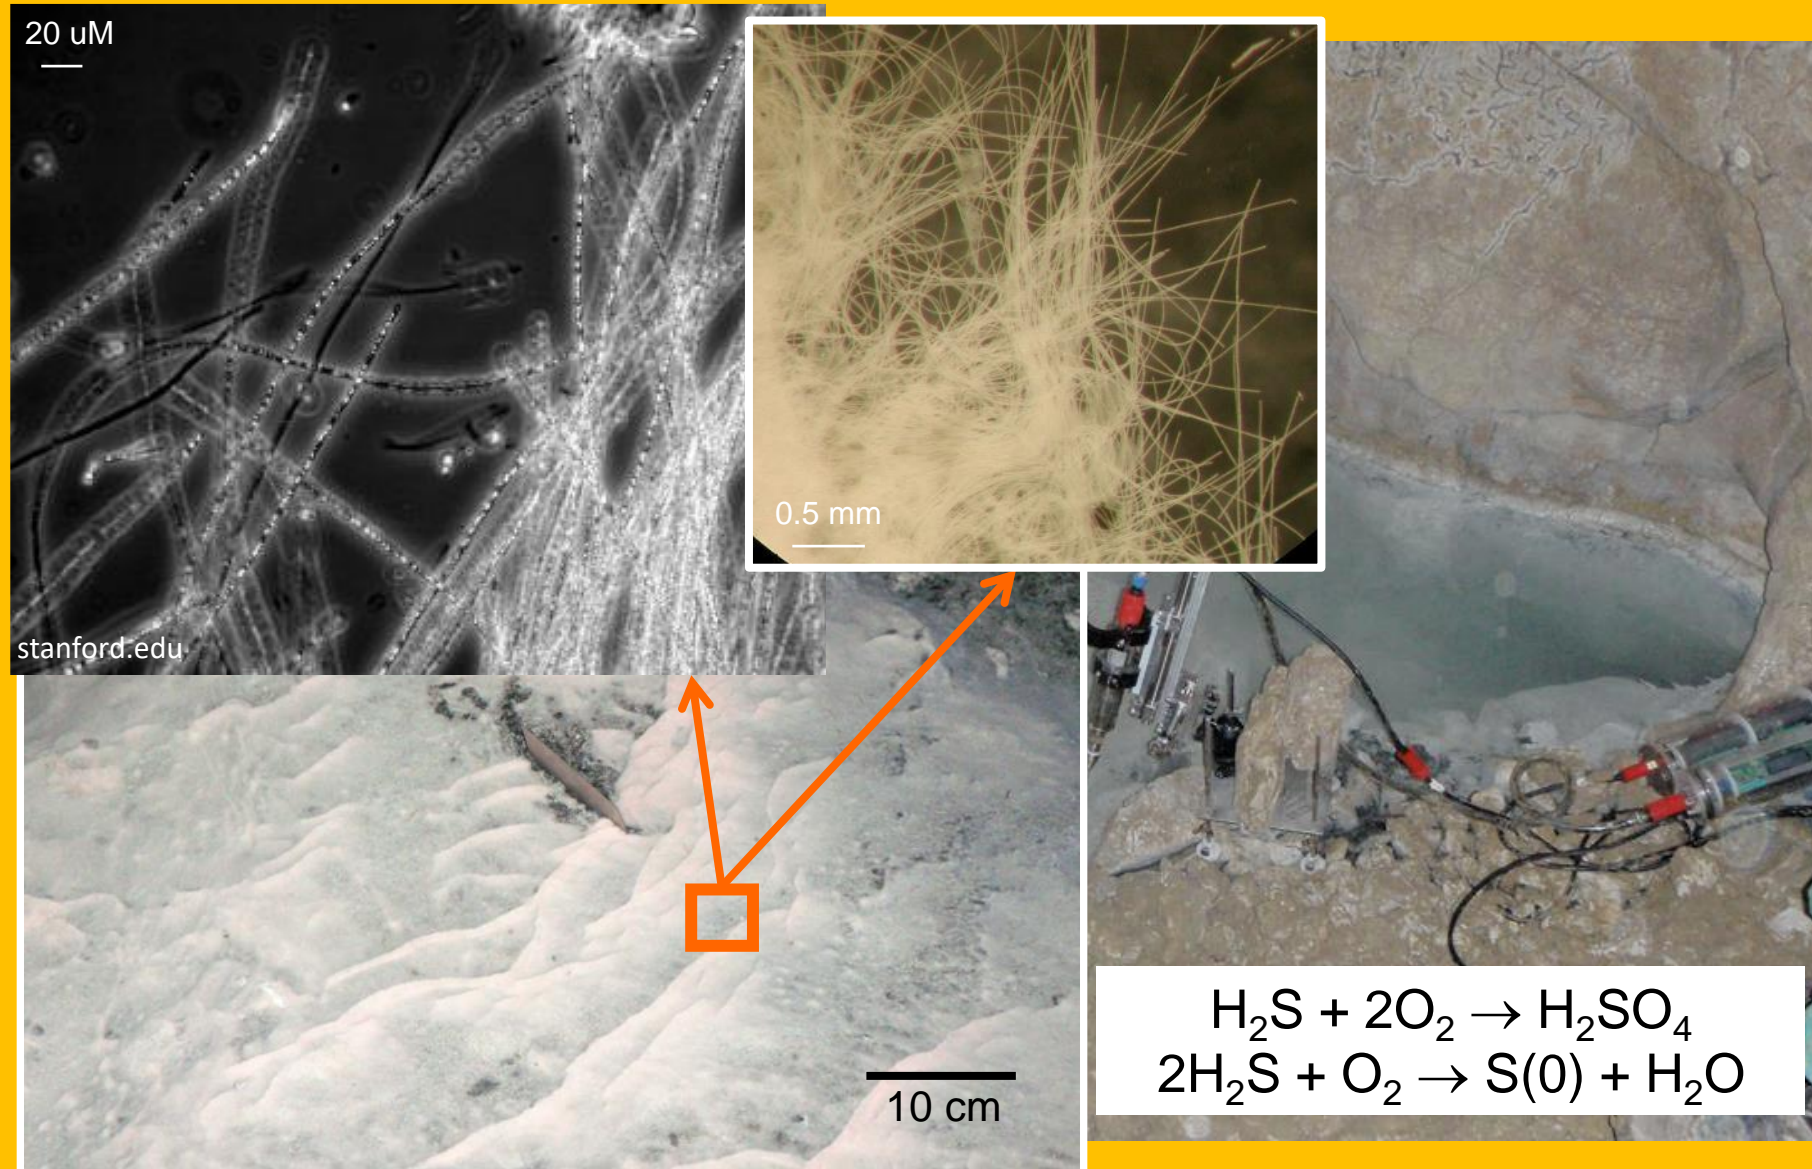

# Microbial biomass in the streams supports animal life

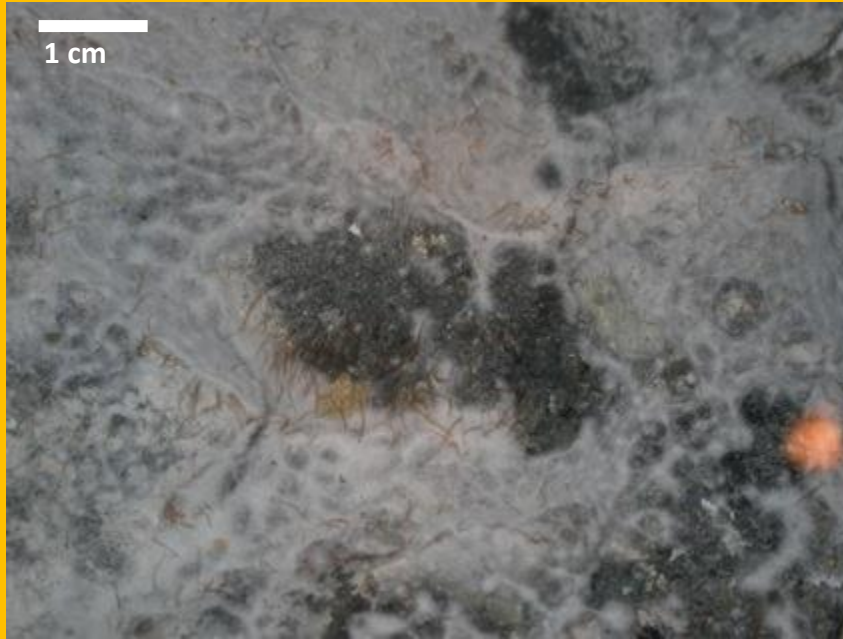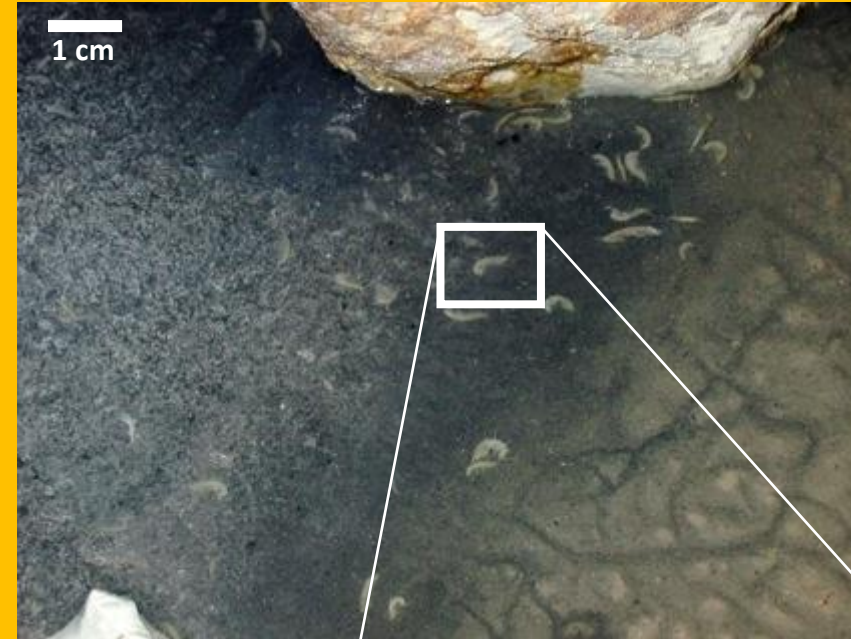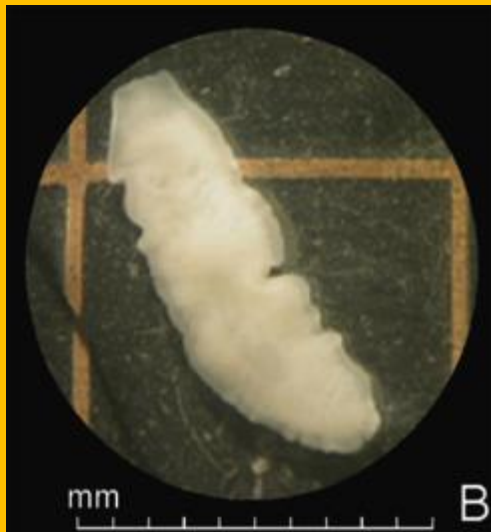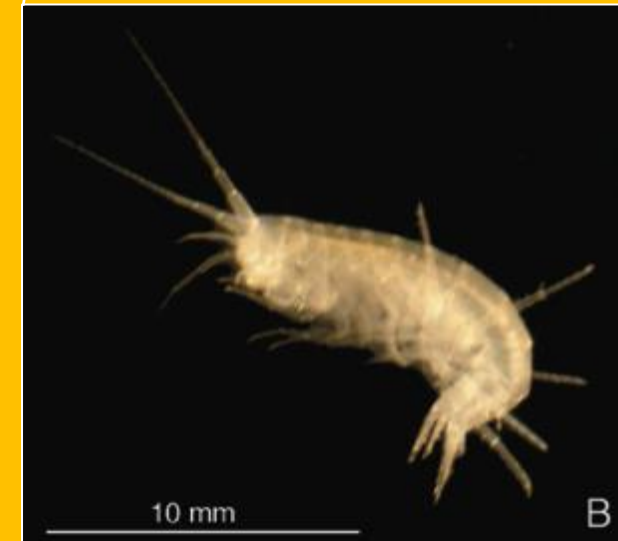

Including symbiotic associations among sulfur oxidizing bacteria and invertebrates

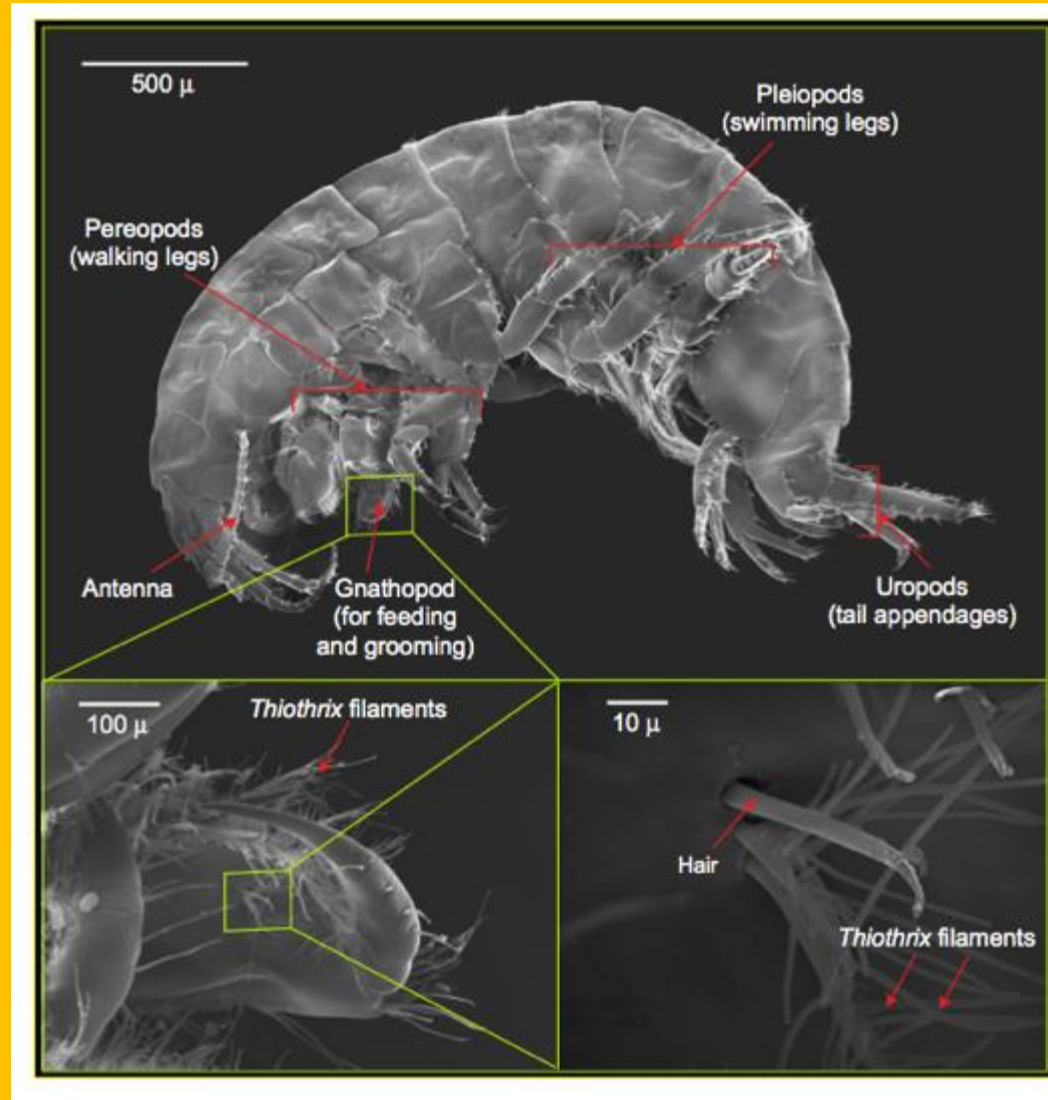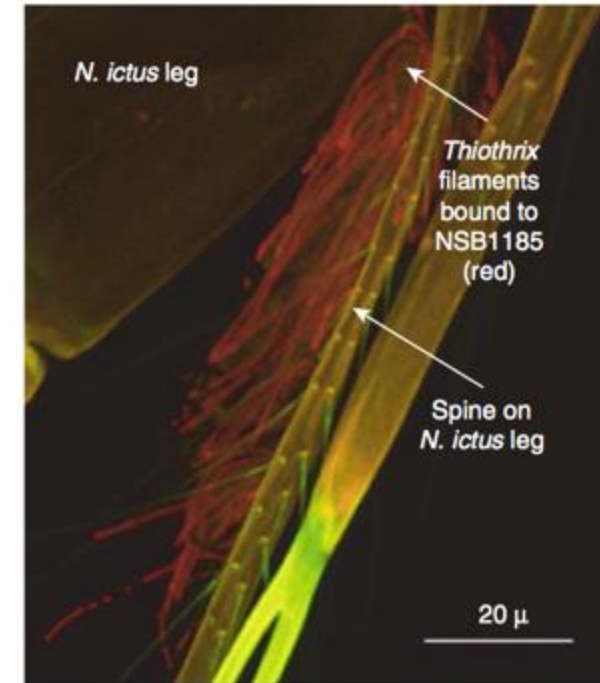

**Figure 2** Confocal epifluorescence micrograph showing *Thiothrix* filaments bound to the NSB1185 probe (red) on a *N. ictus* leg spine (green and red autofluorescence).

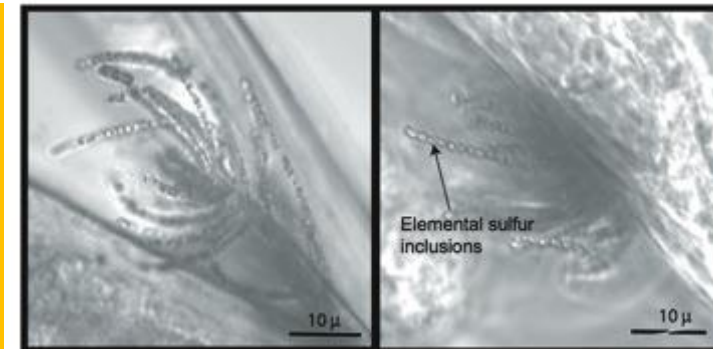

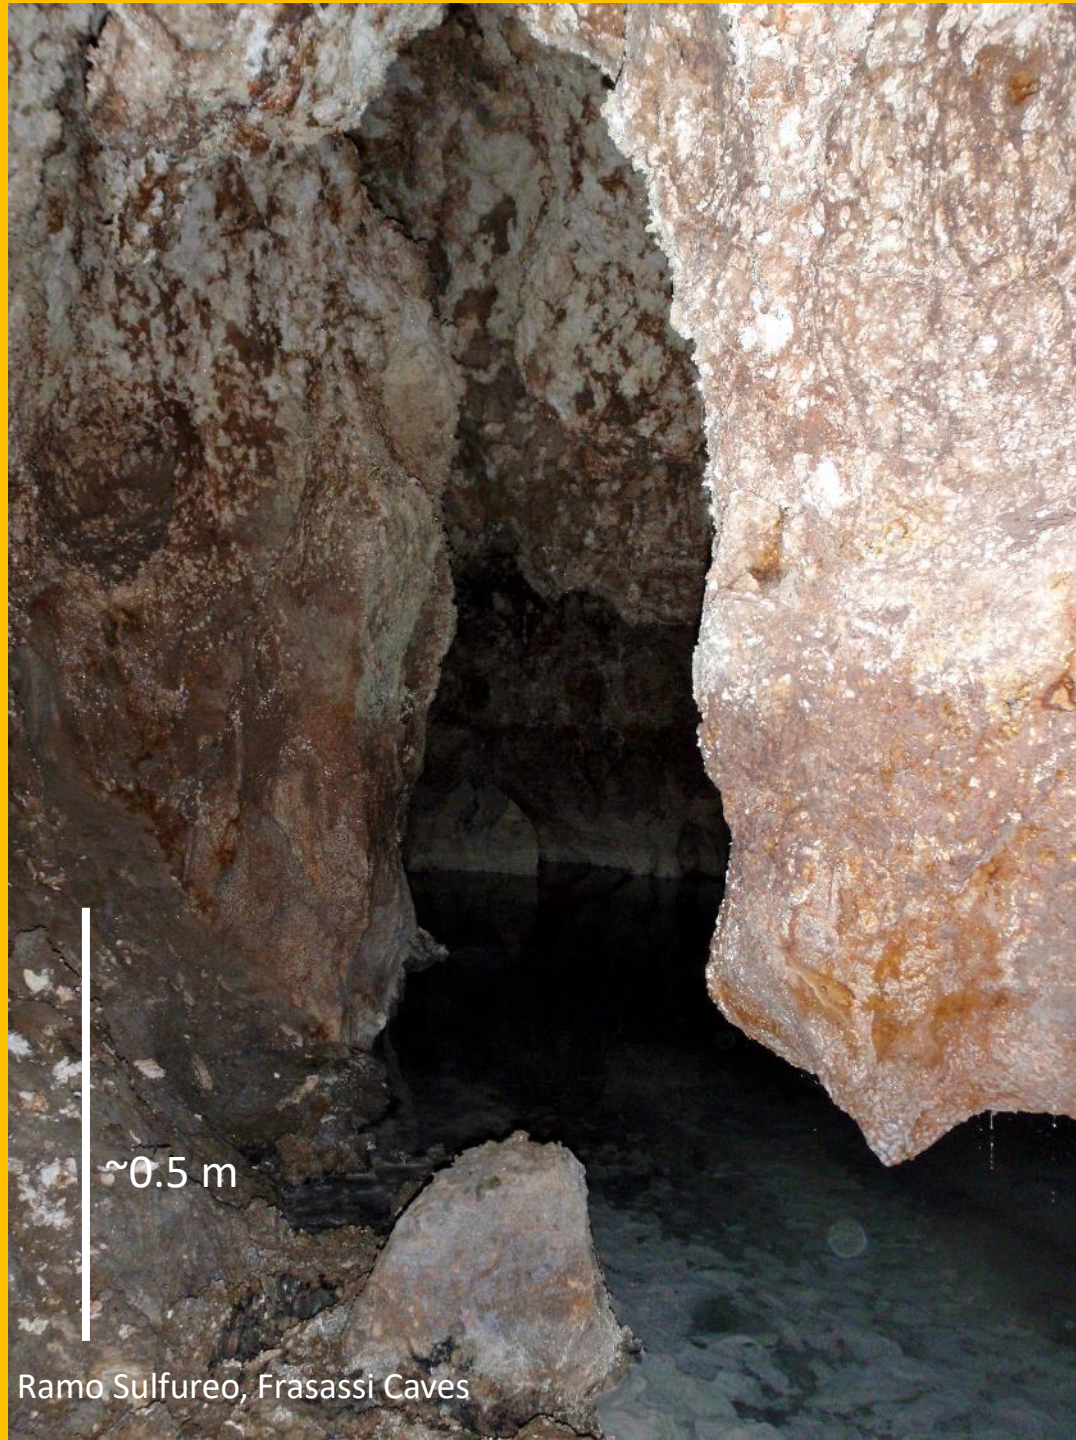

Ramo Sulfureo, Frasassi Caves

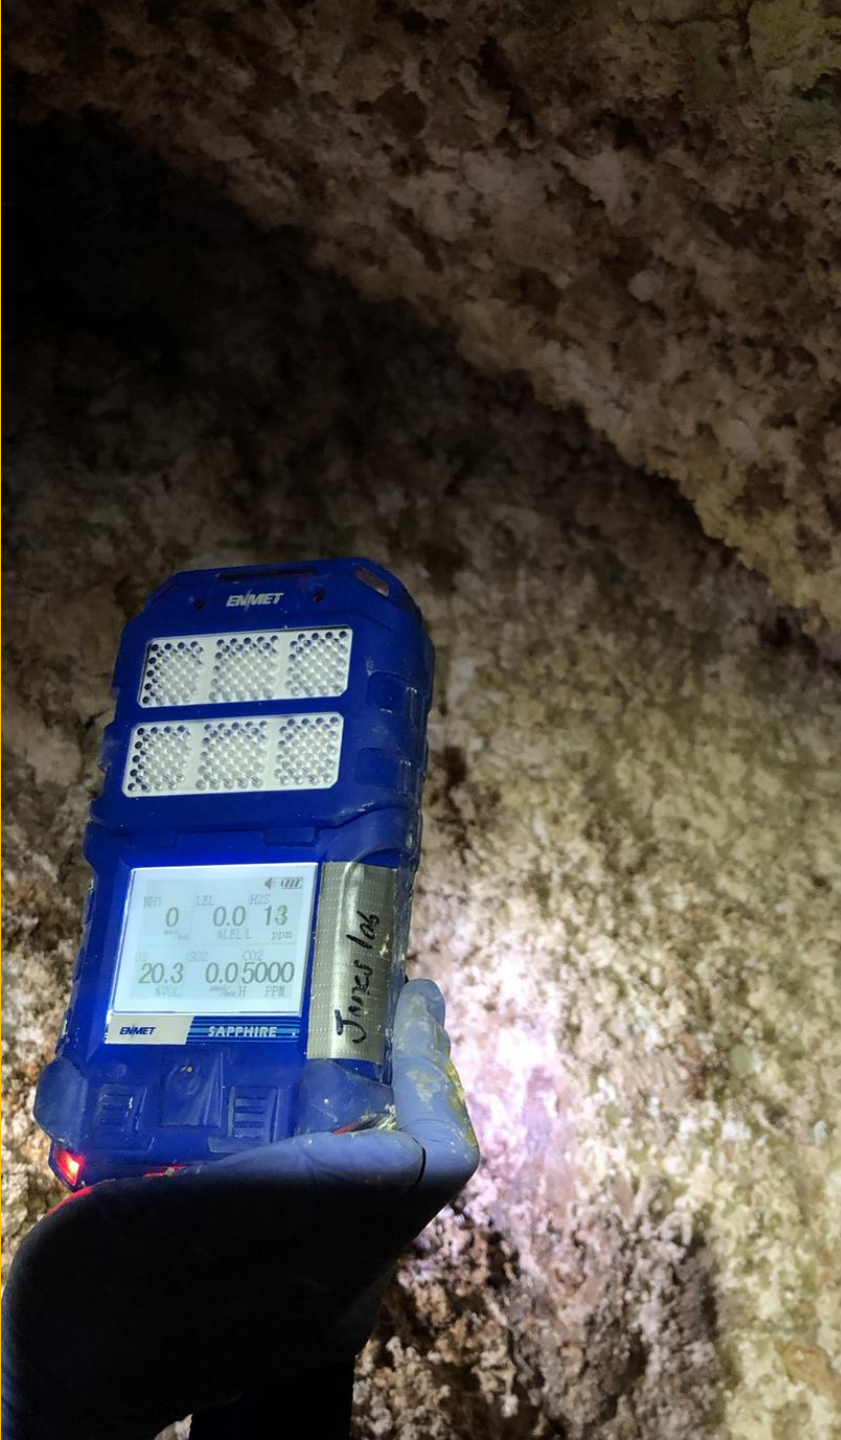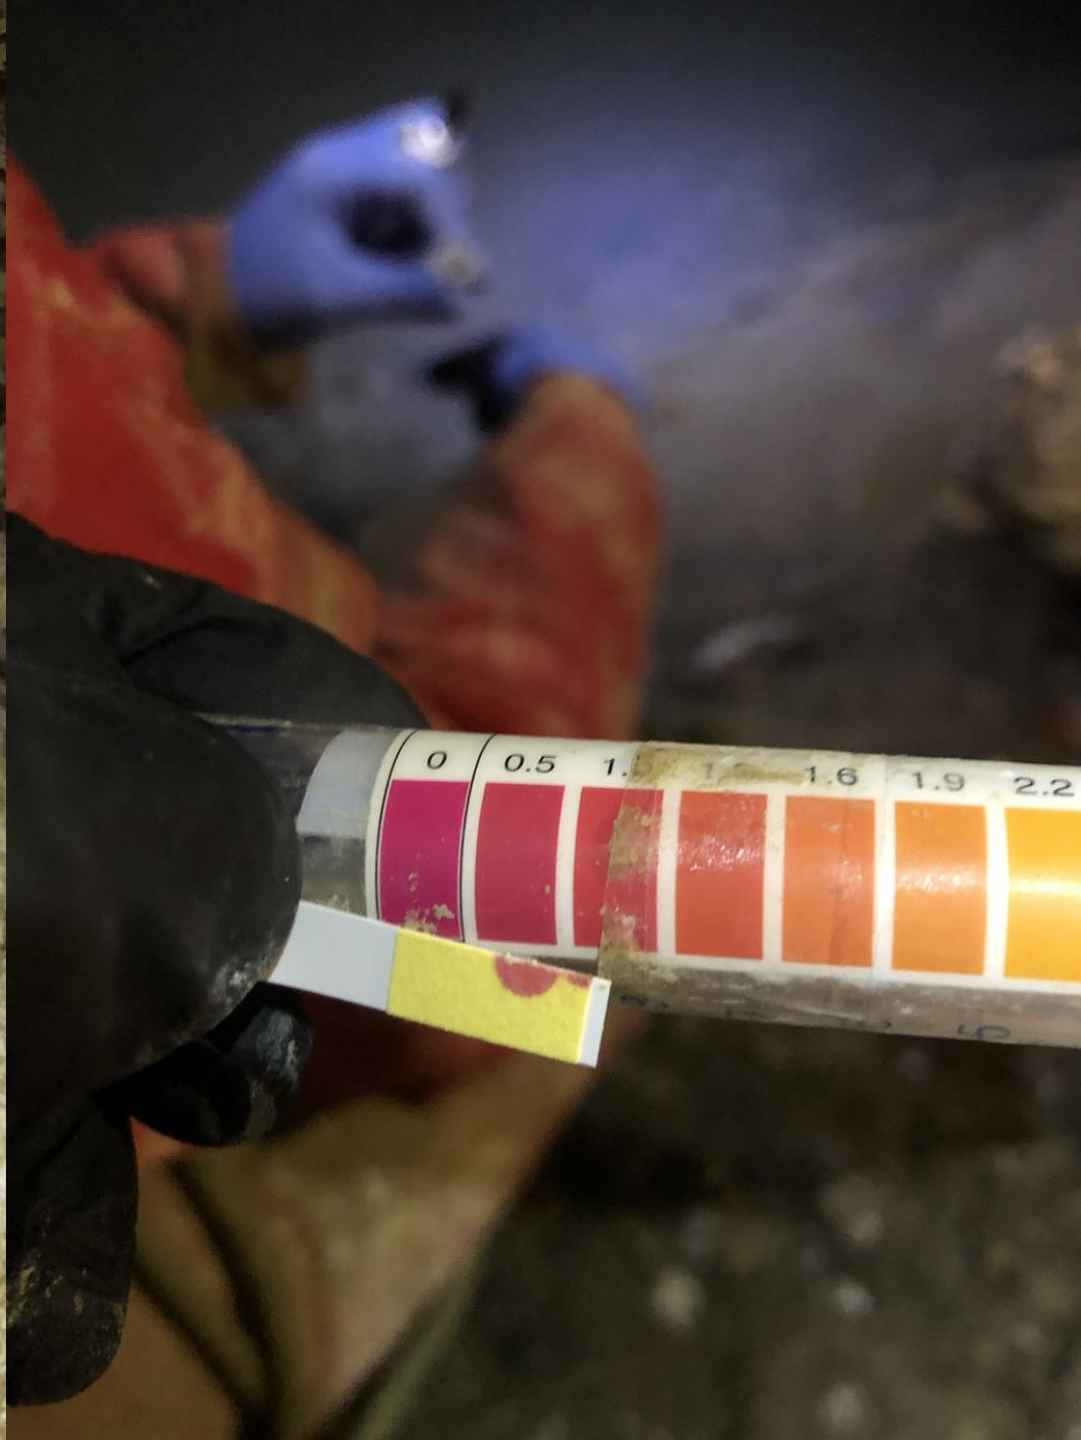

Extremely acidic biofilms and mineral deposits develop above the water table

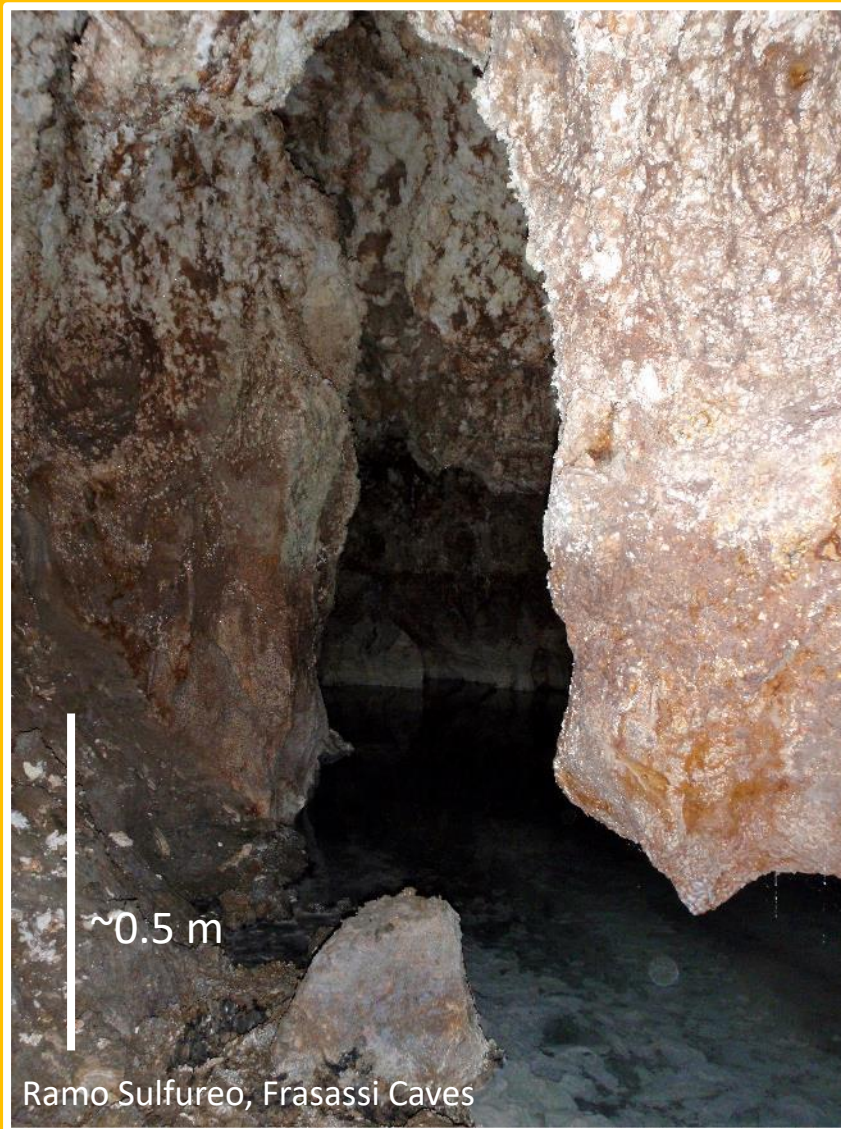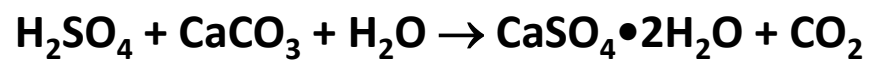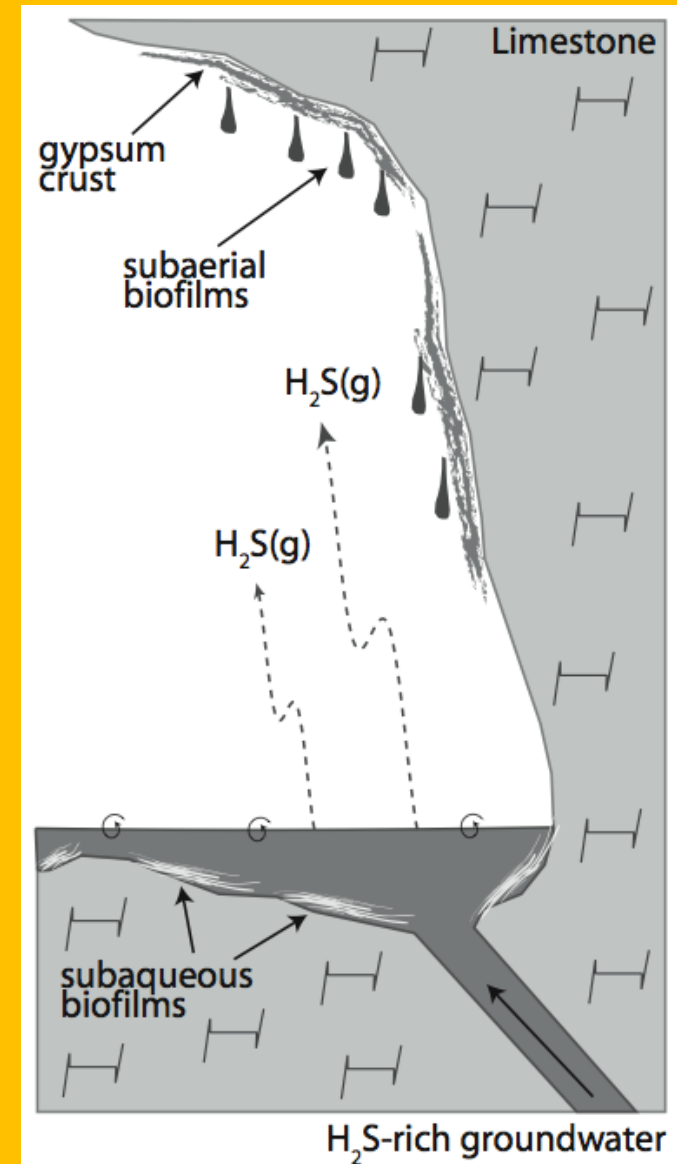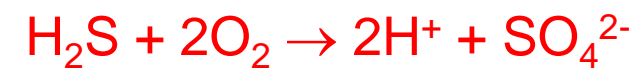

Extremely acidic biofilms and mineral deposits develop above the water table

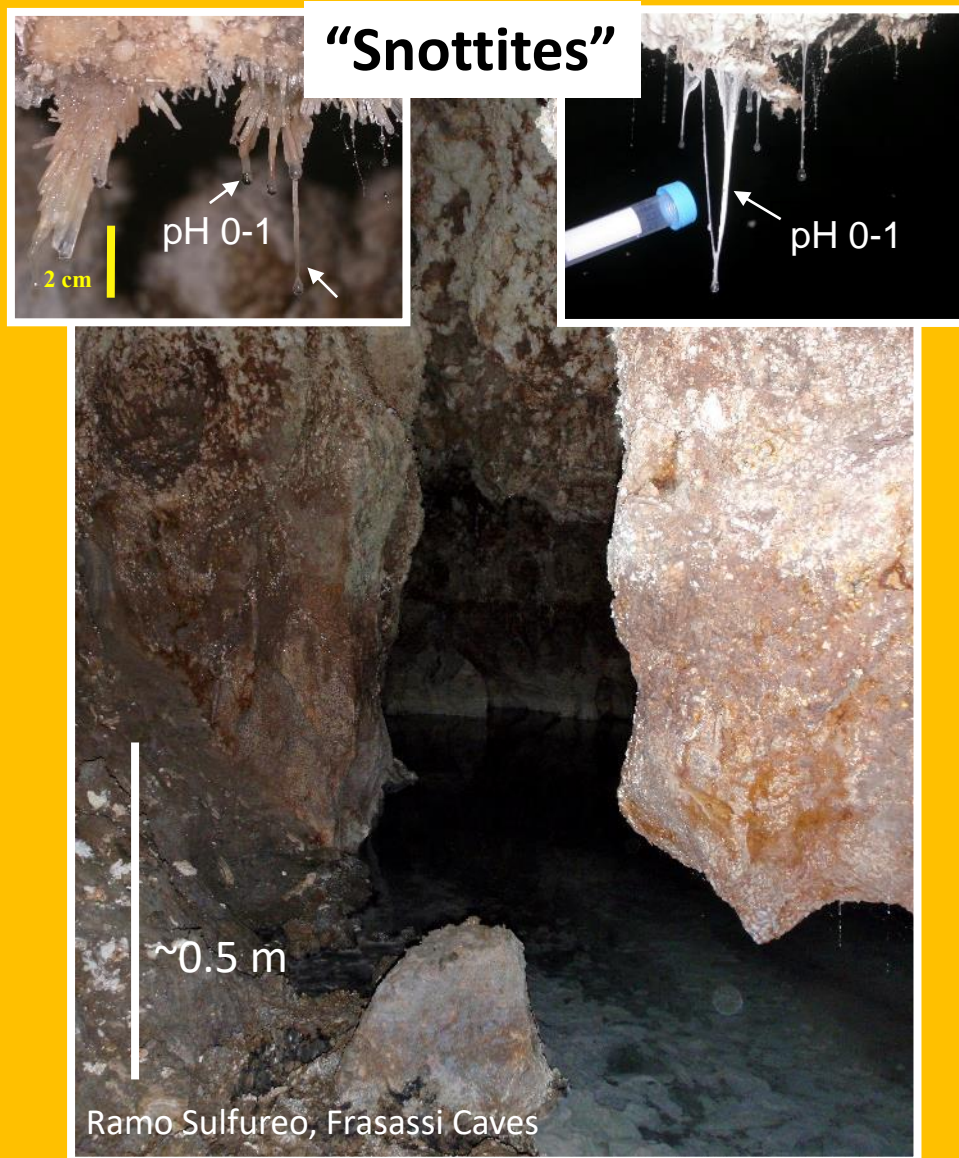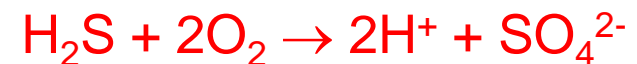

## Acidic gypsum and elemental S deposits

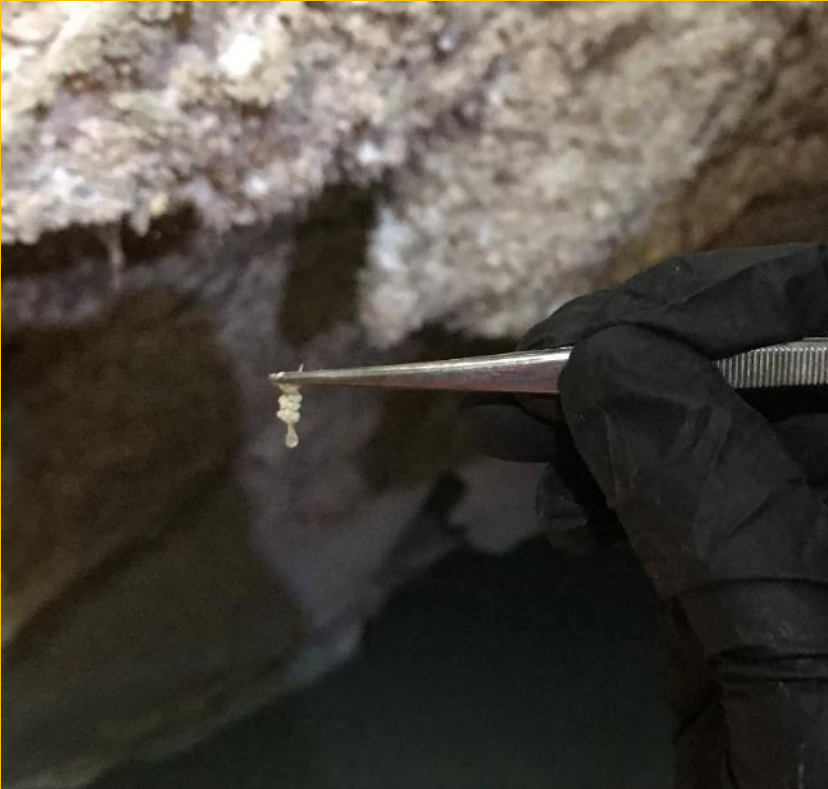

### Sulfide oxidation

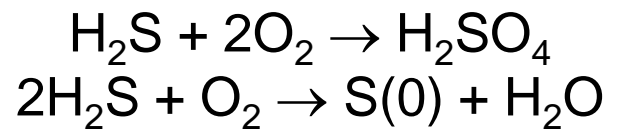

### Gypsum formation

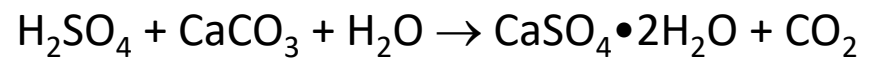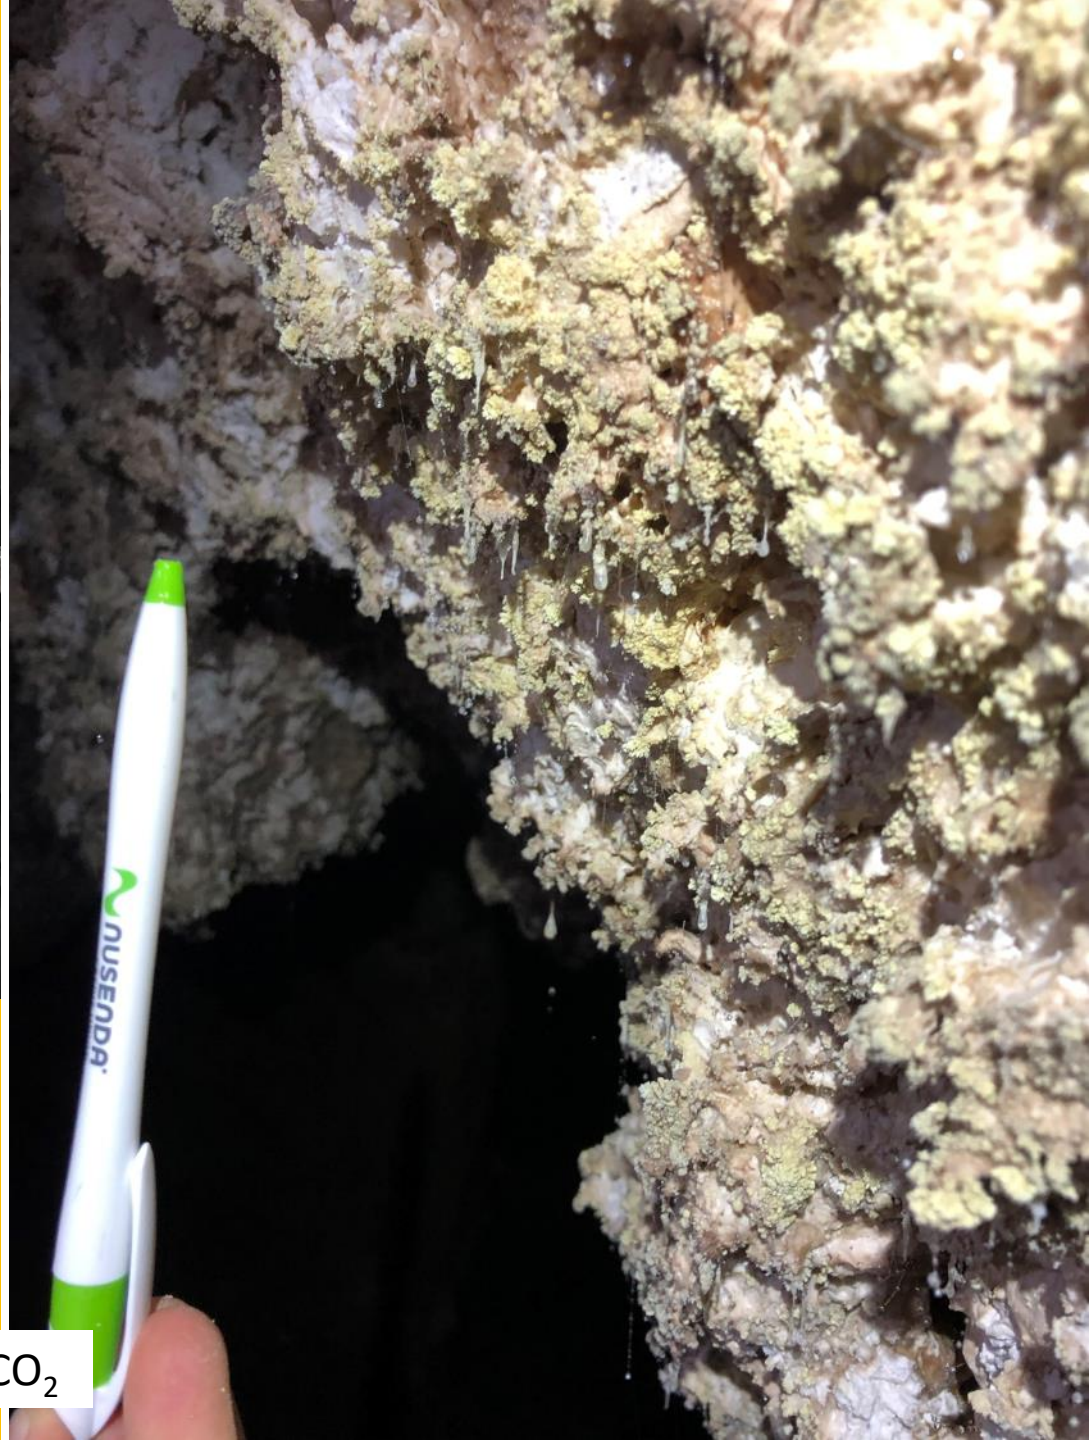

Things start to look different further from the  $\text{H}_2\text{S}$  source

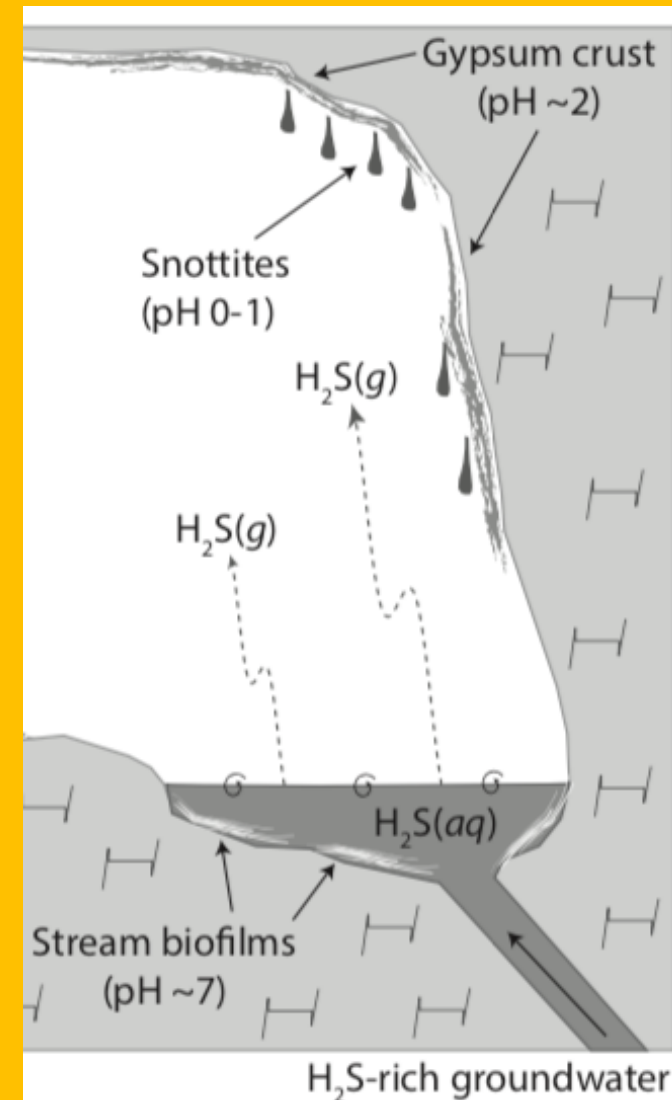

Things start to look different further from the  $\text{H}_2\text{S}$  source

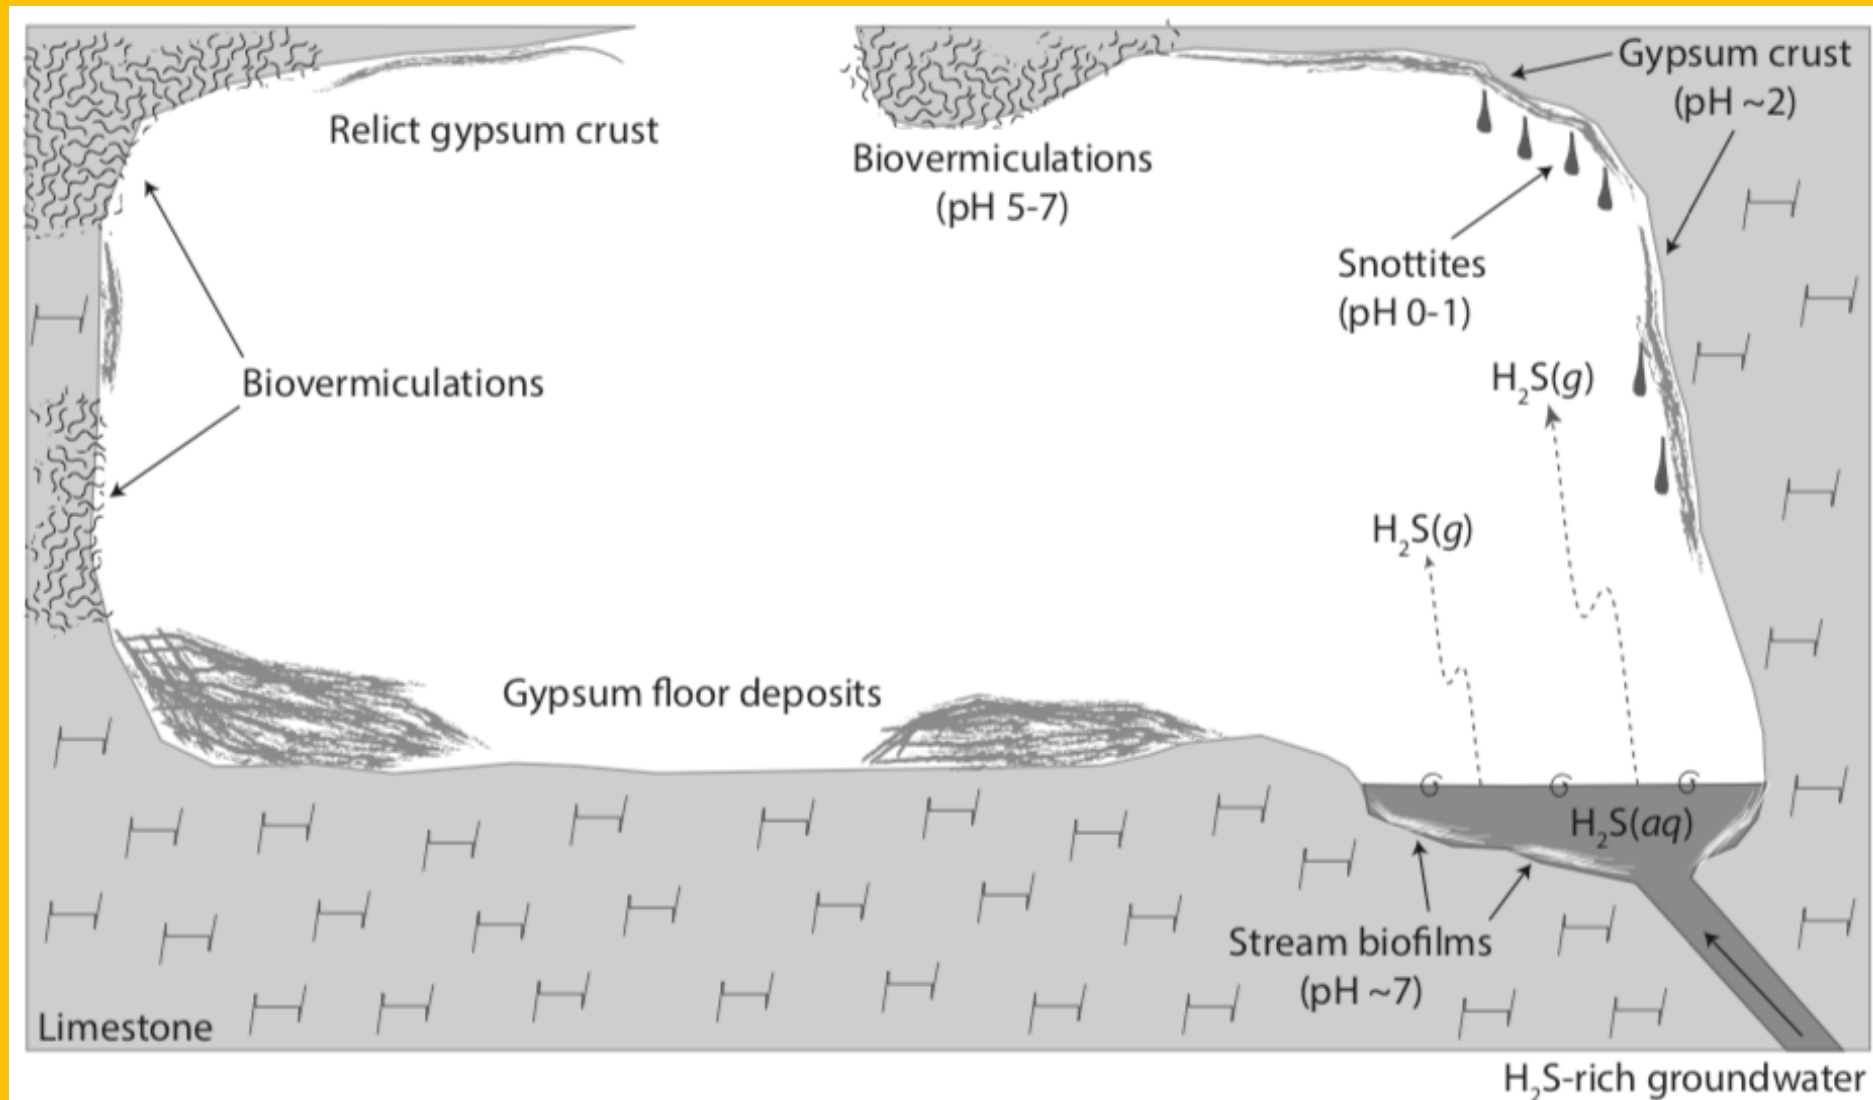

Biovermiculations cover  
exposed limestone  
surfaces farther from the  
 $\text{H}_2\text{S}$  degassing source

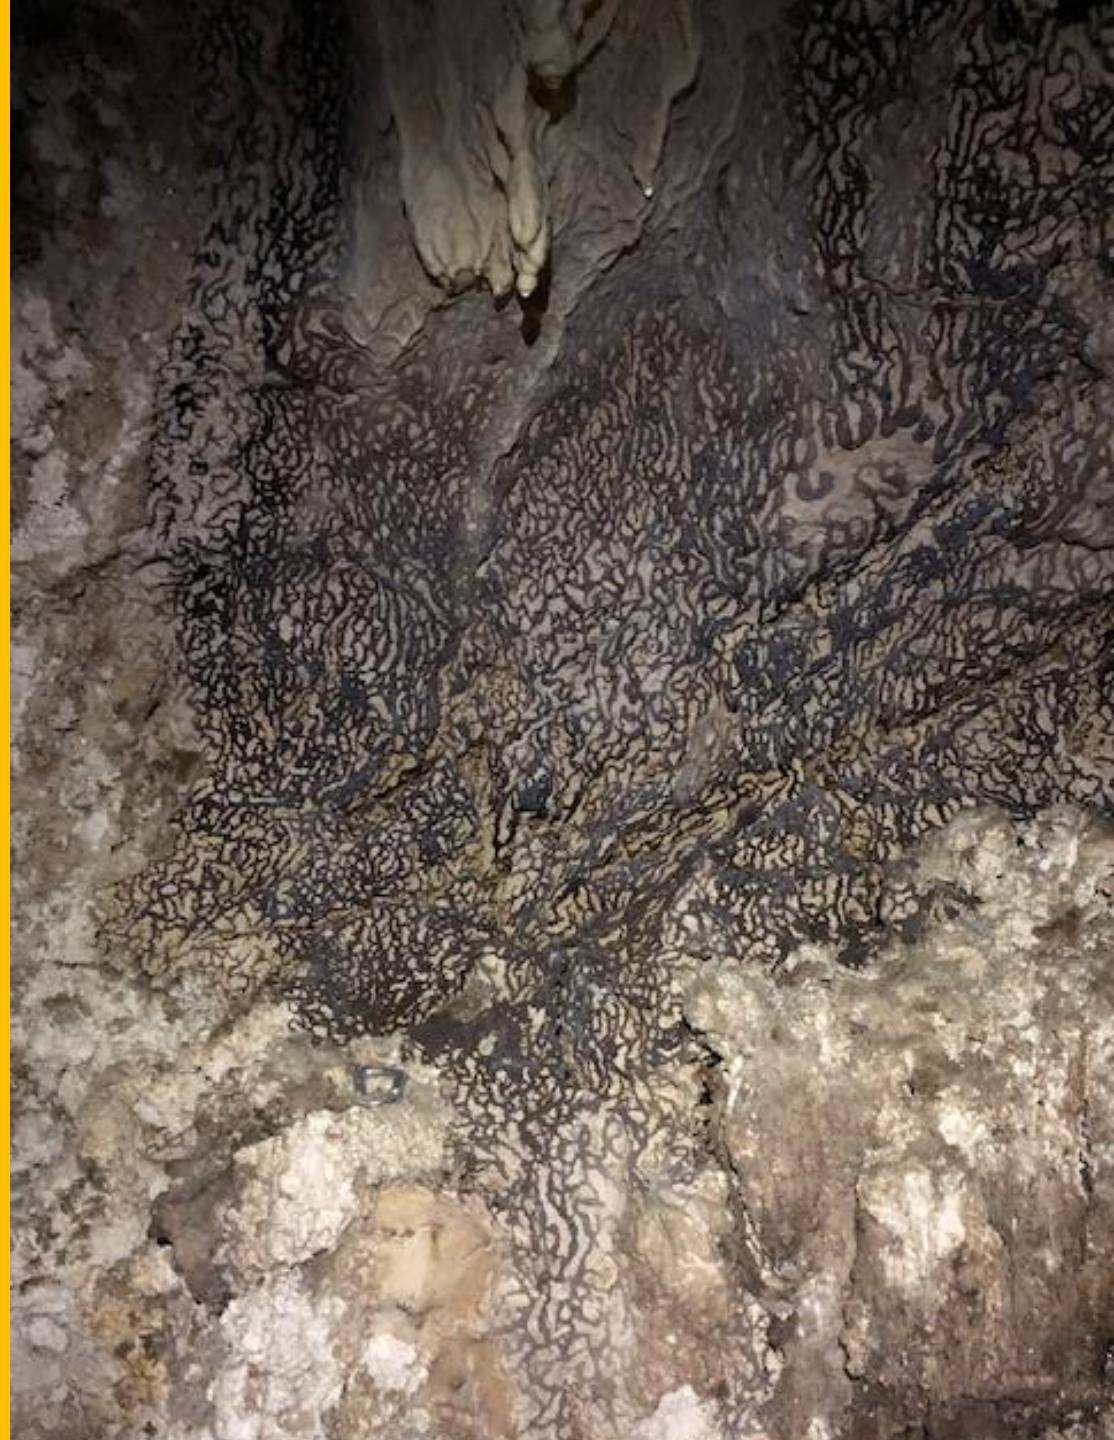

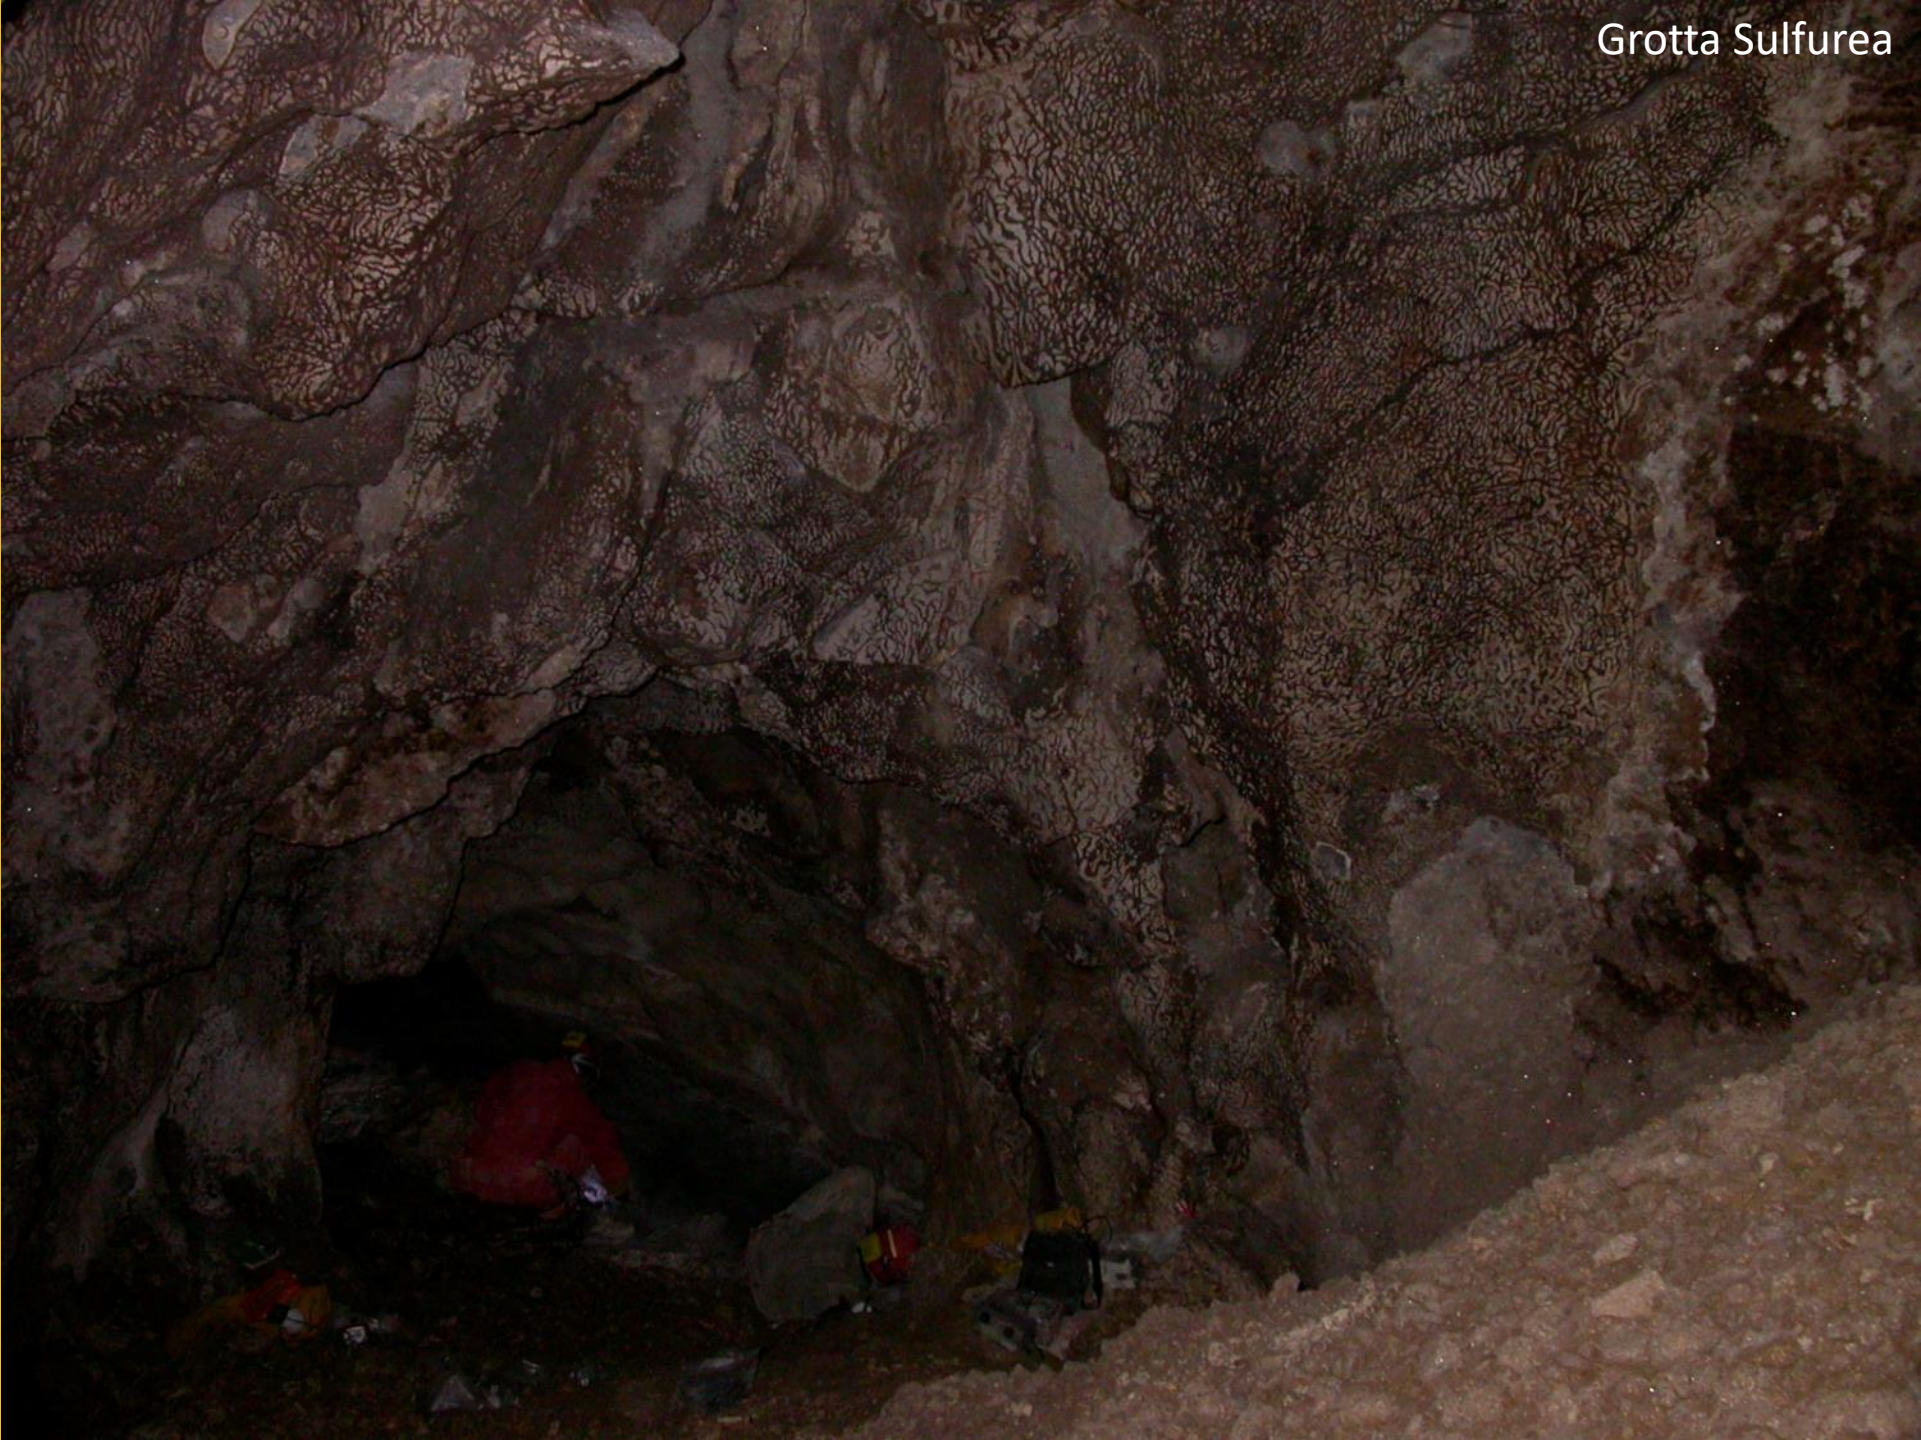

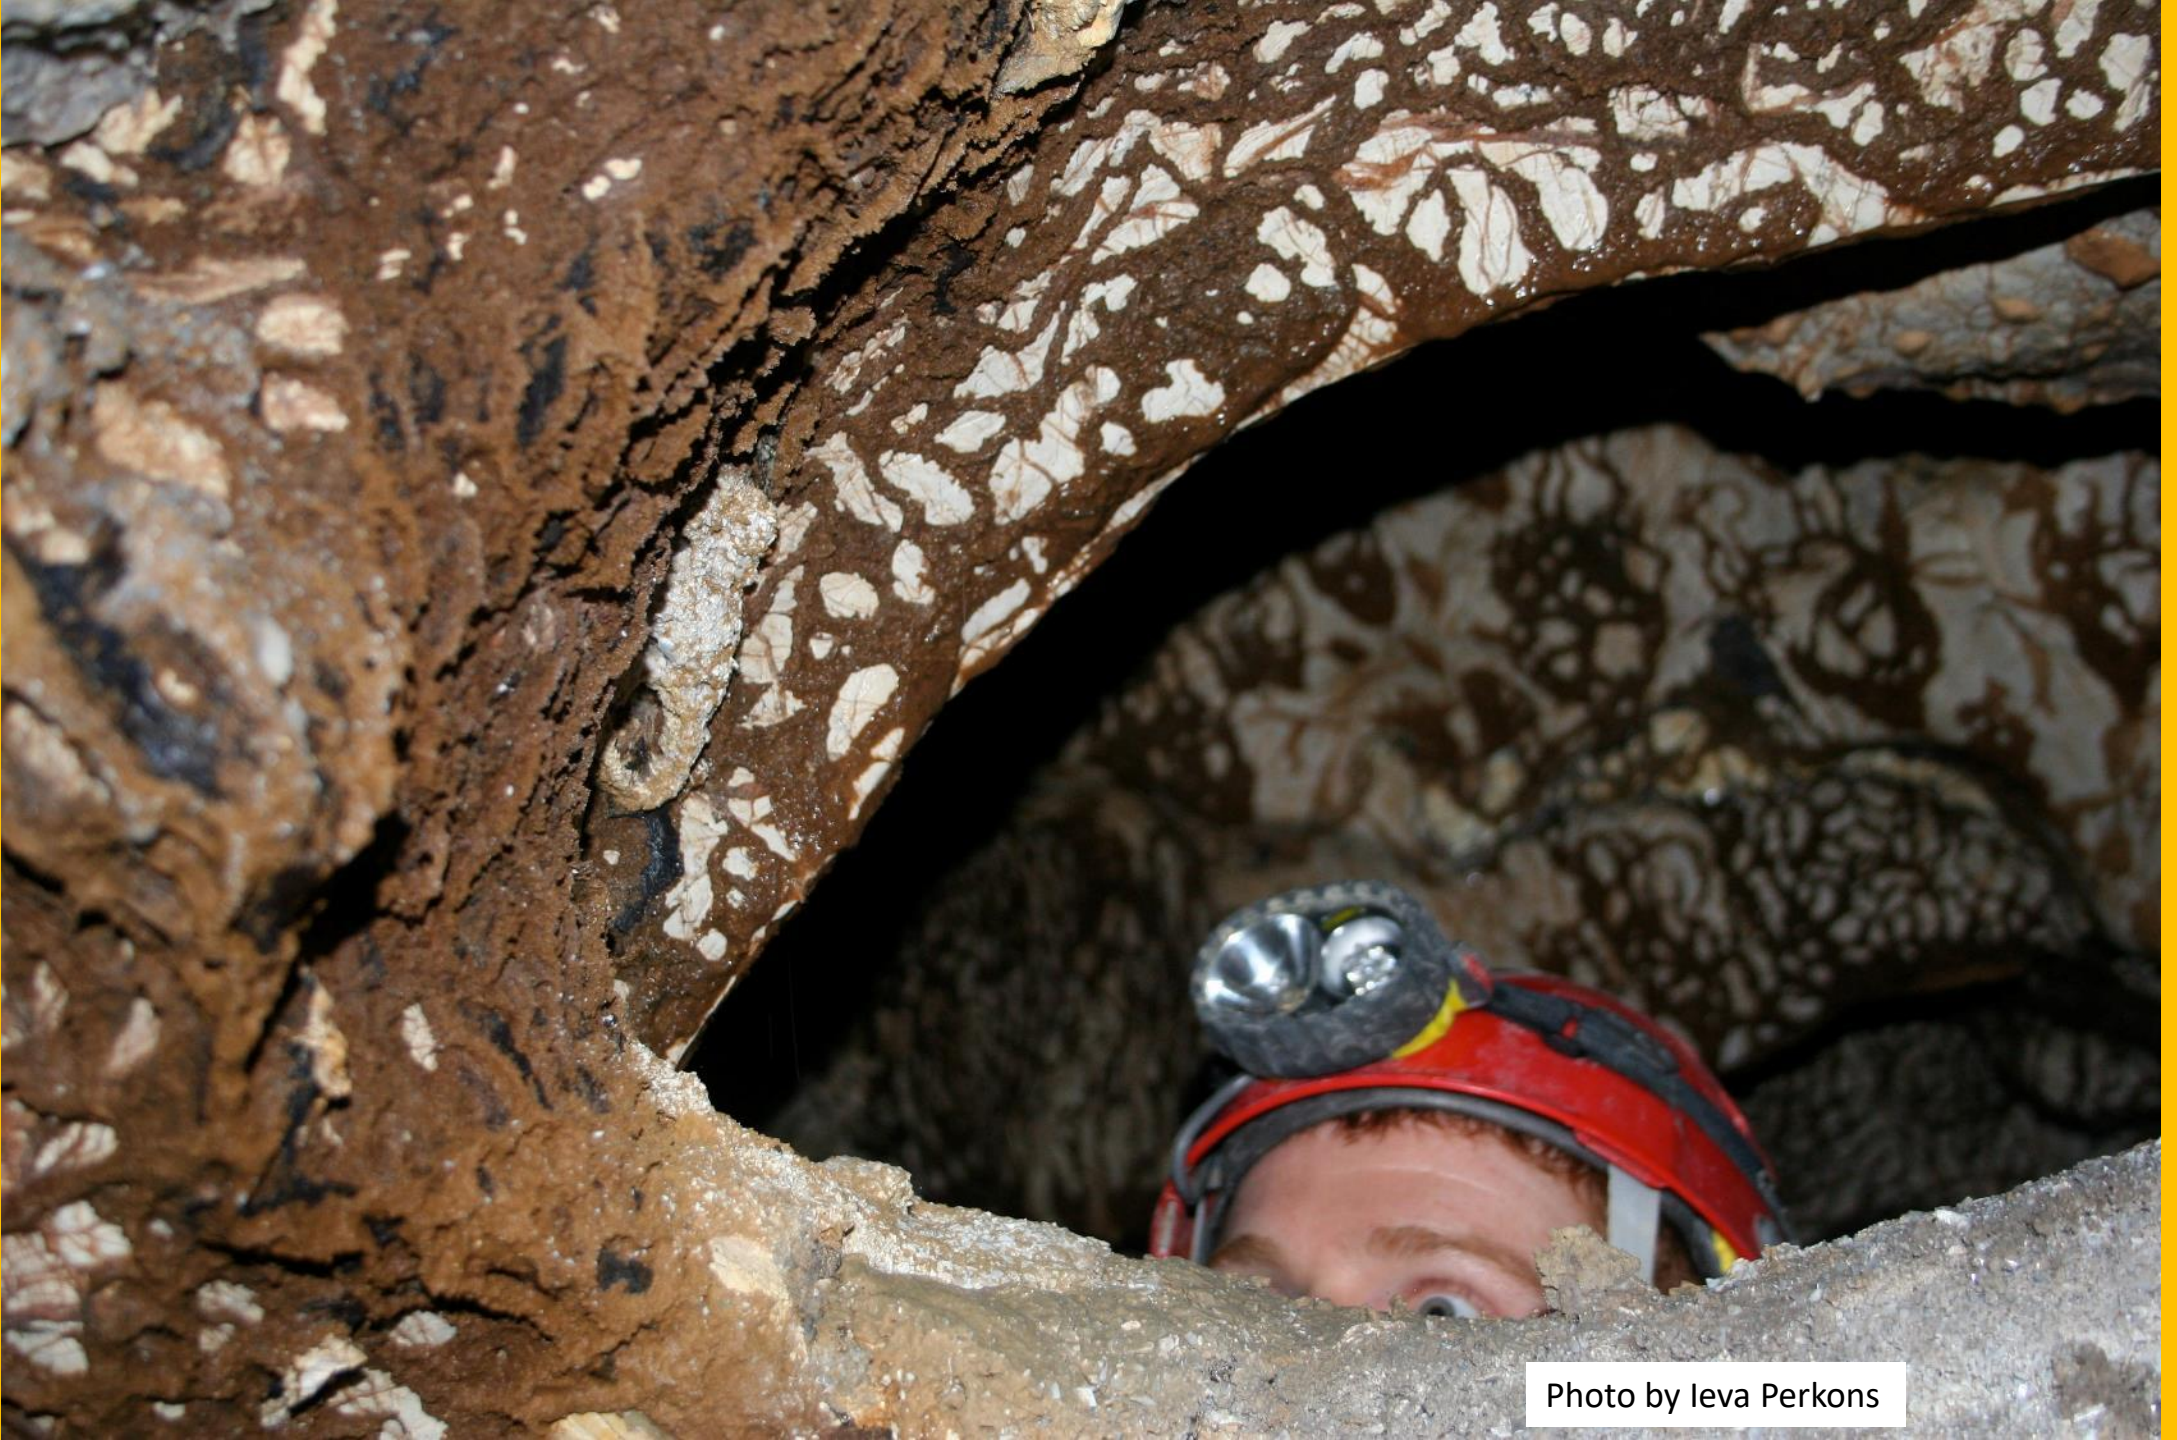

3/22/18

Photo by Ieva Perkons

Morphological evidence for abandoned sulfidic stream channels several meters above the current water table

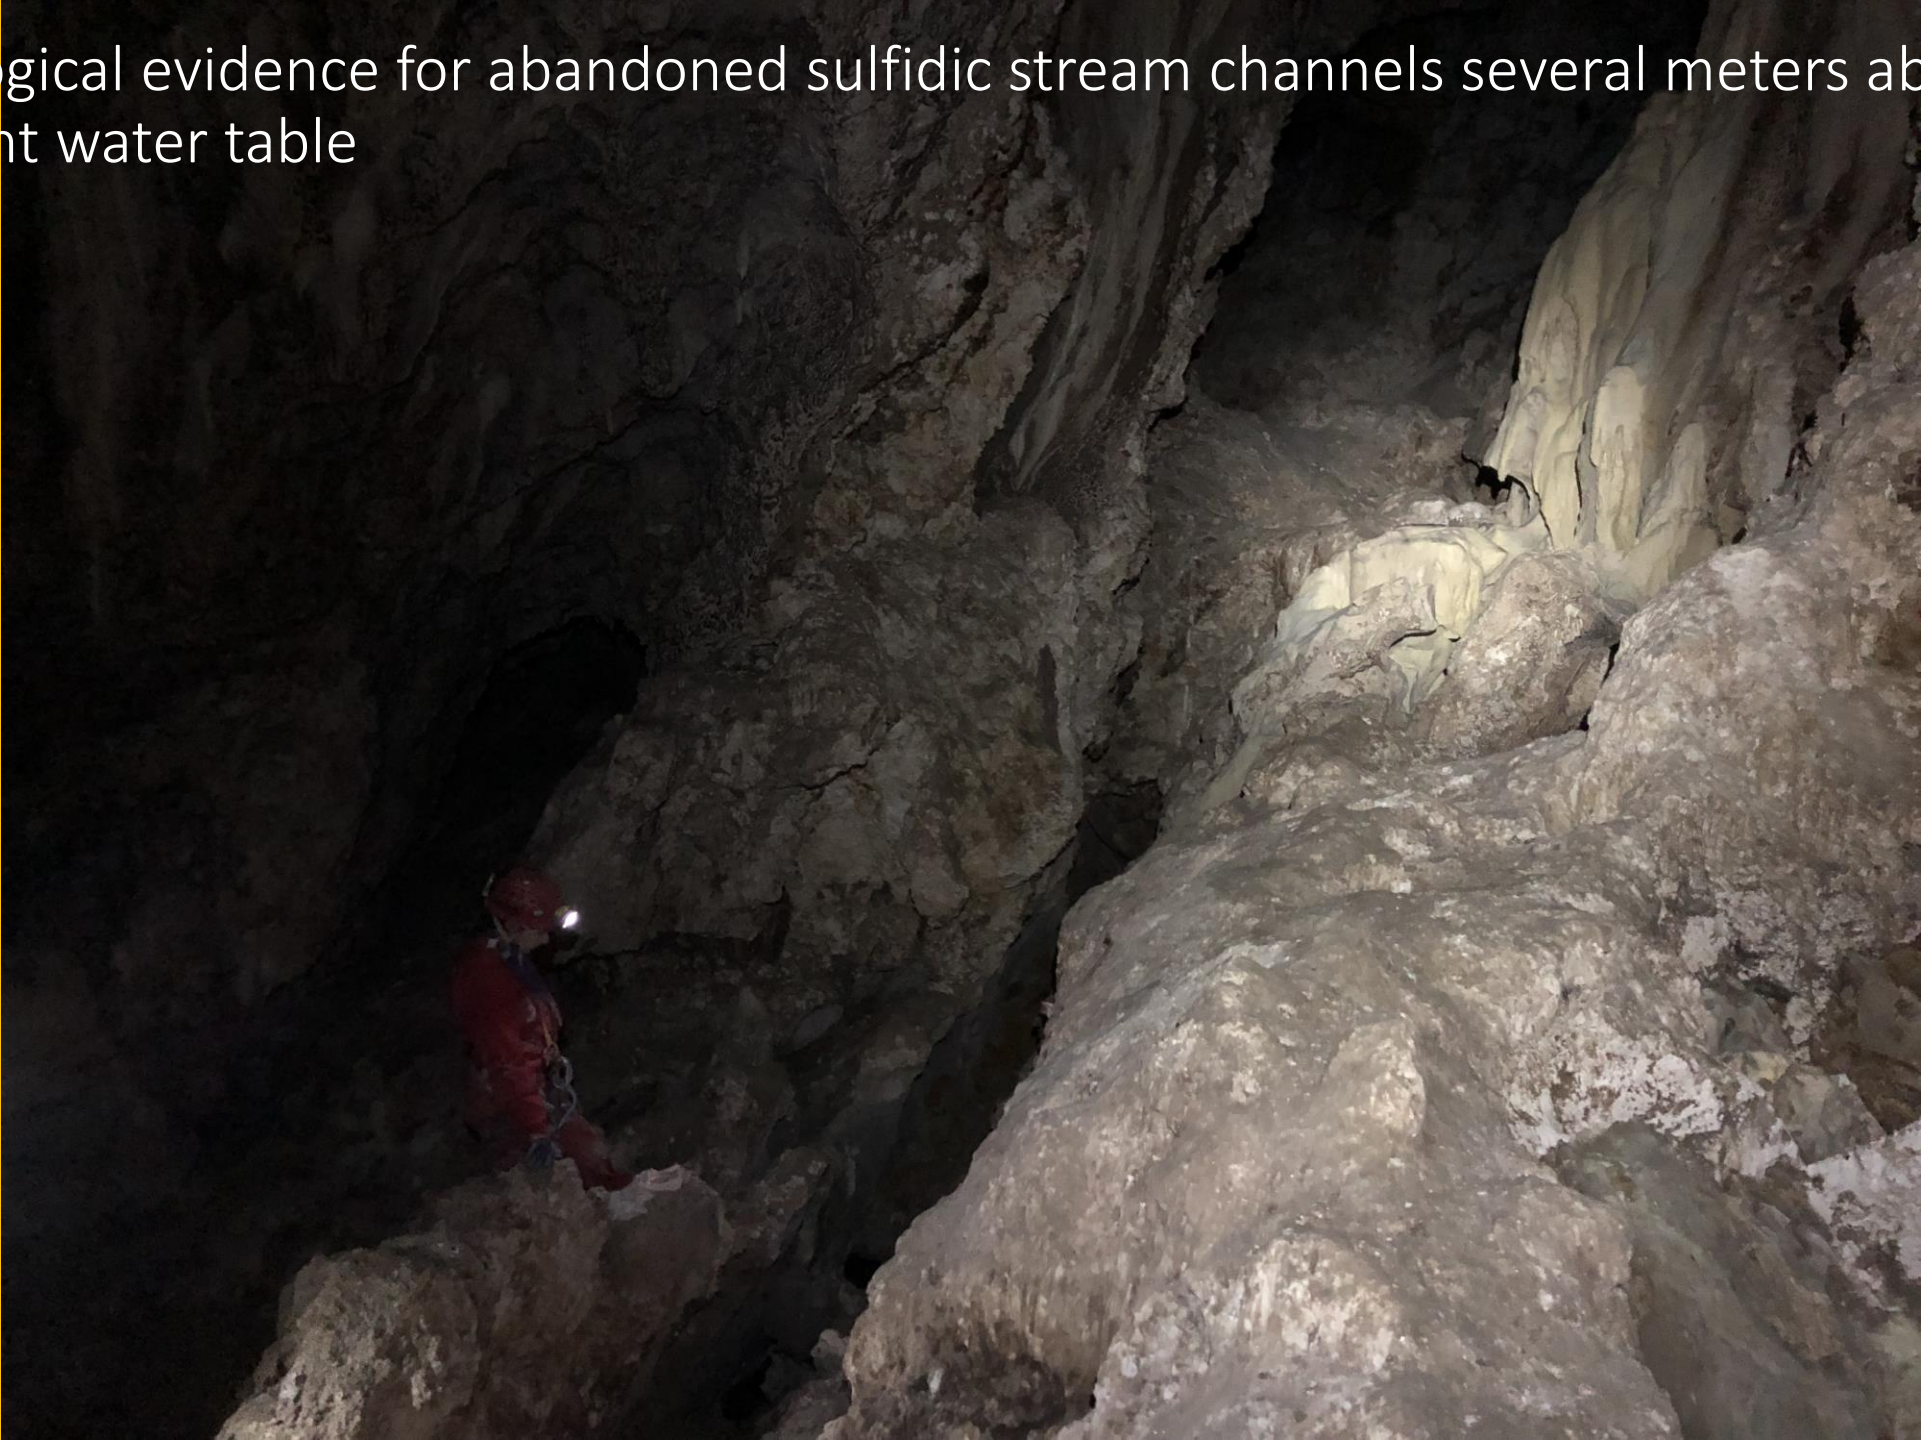

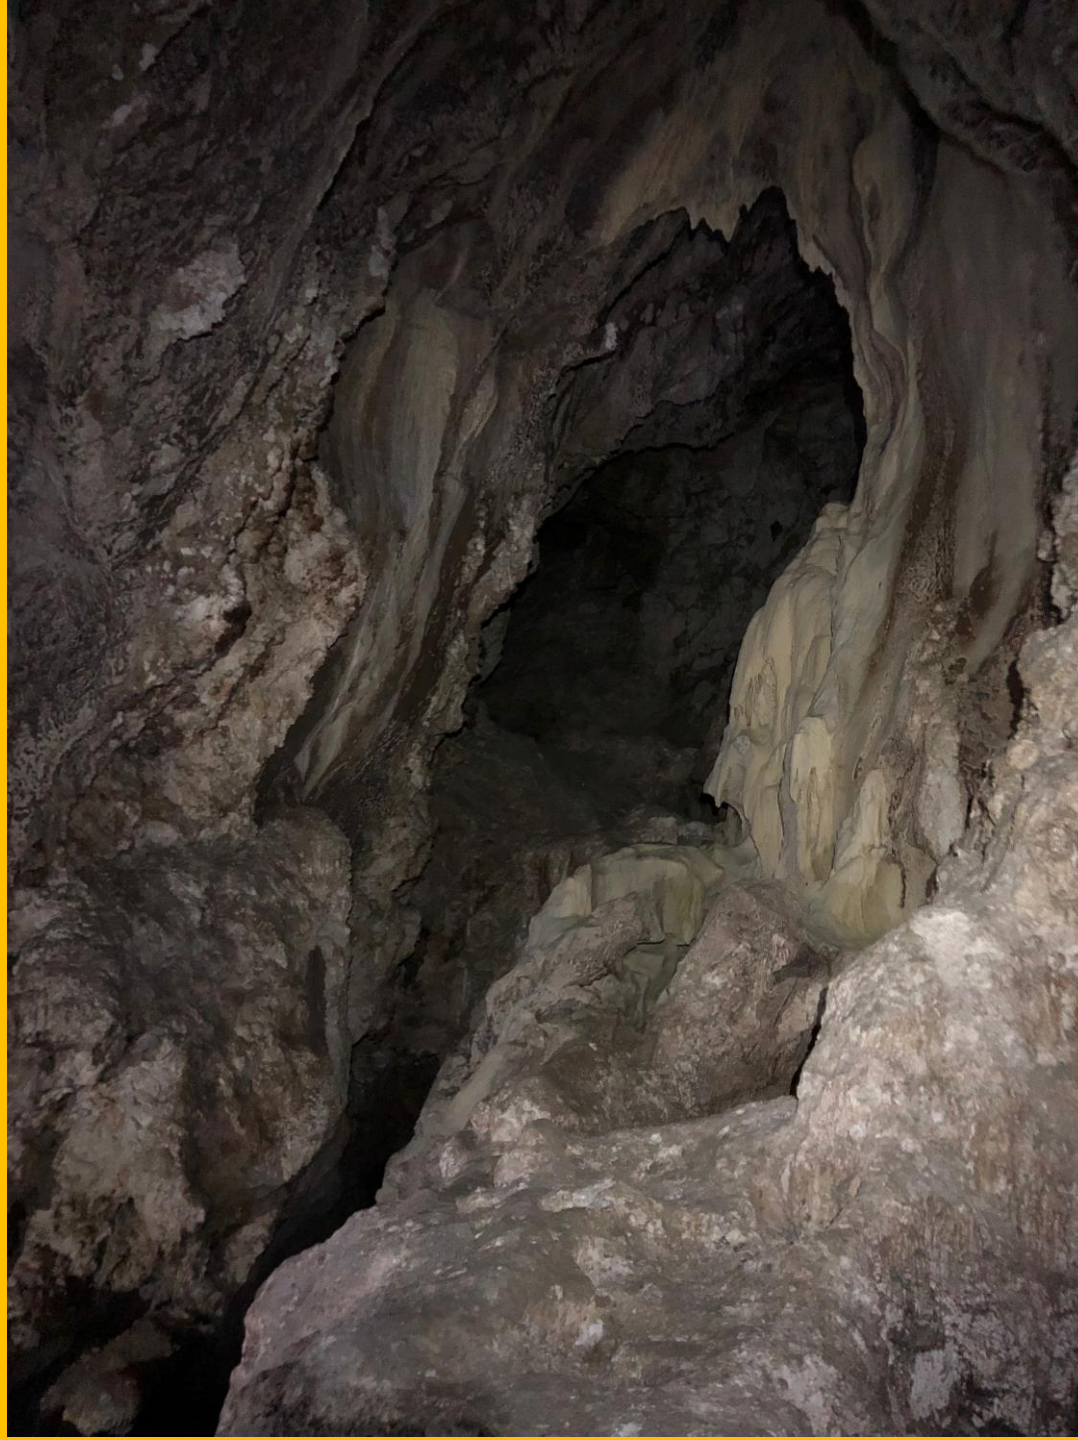

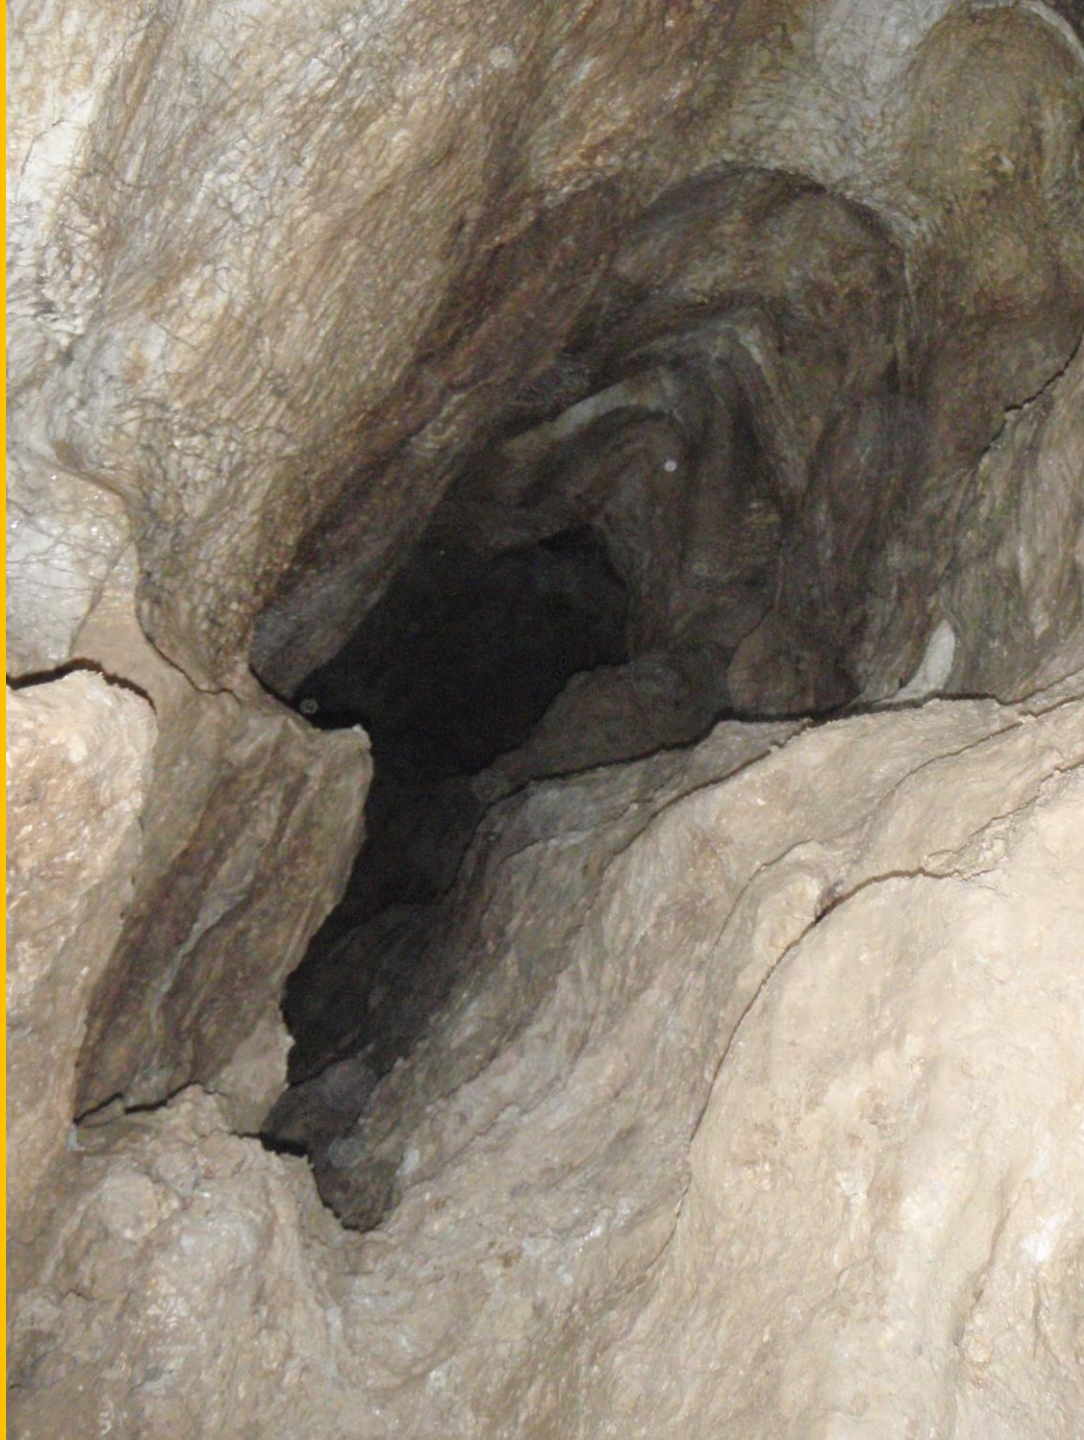

“Bug” cave

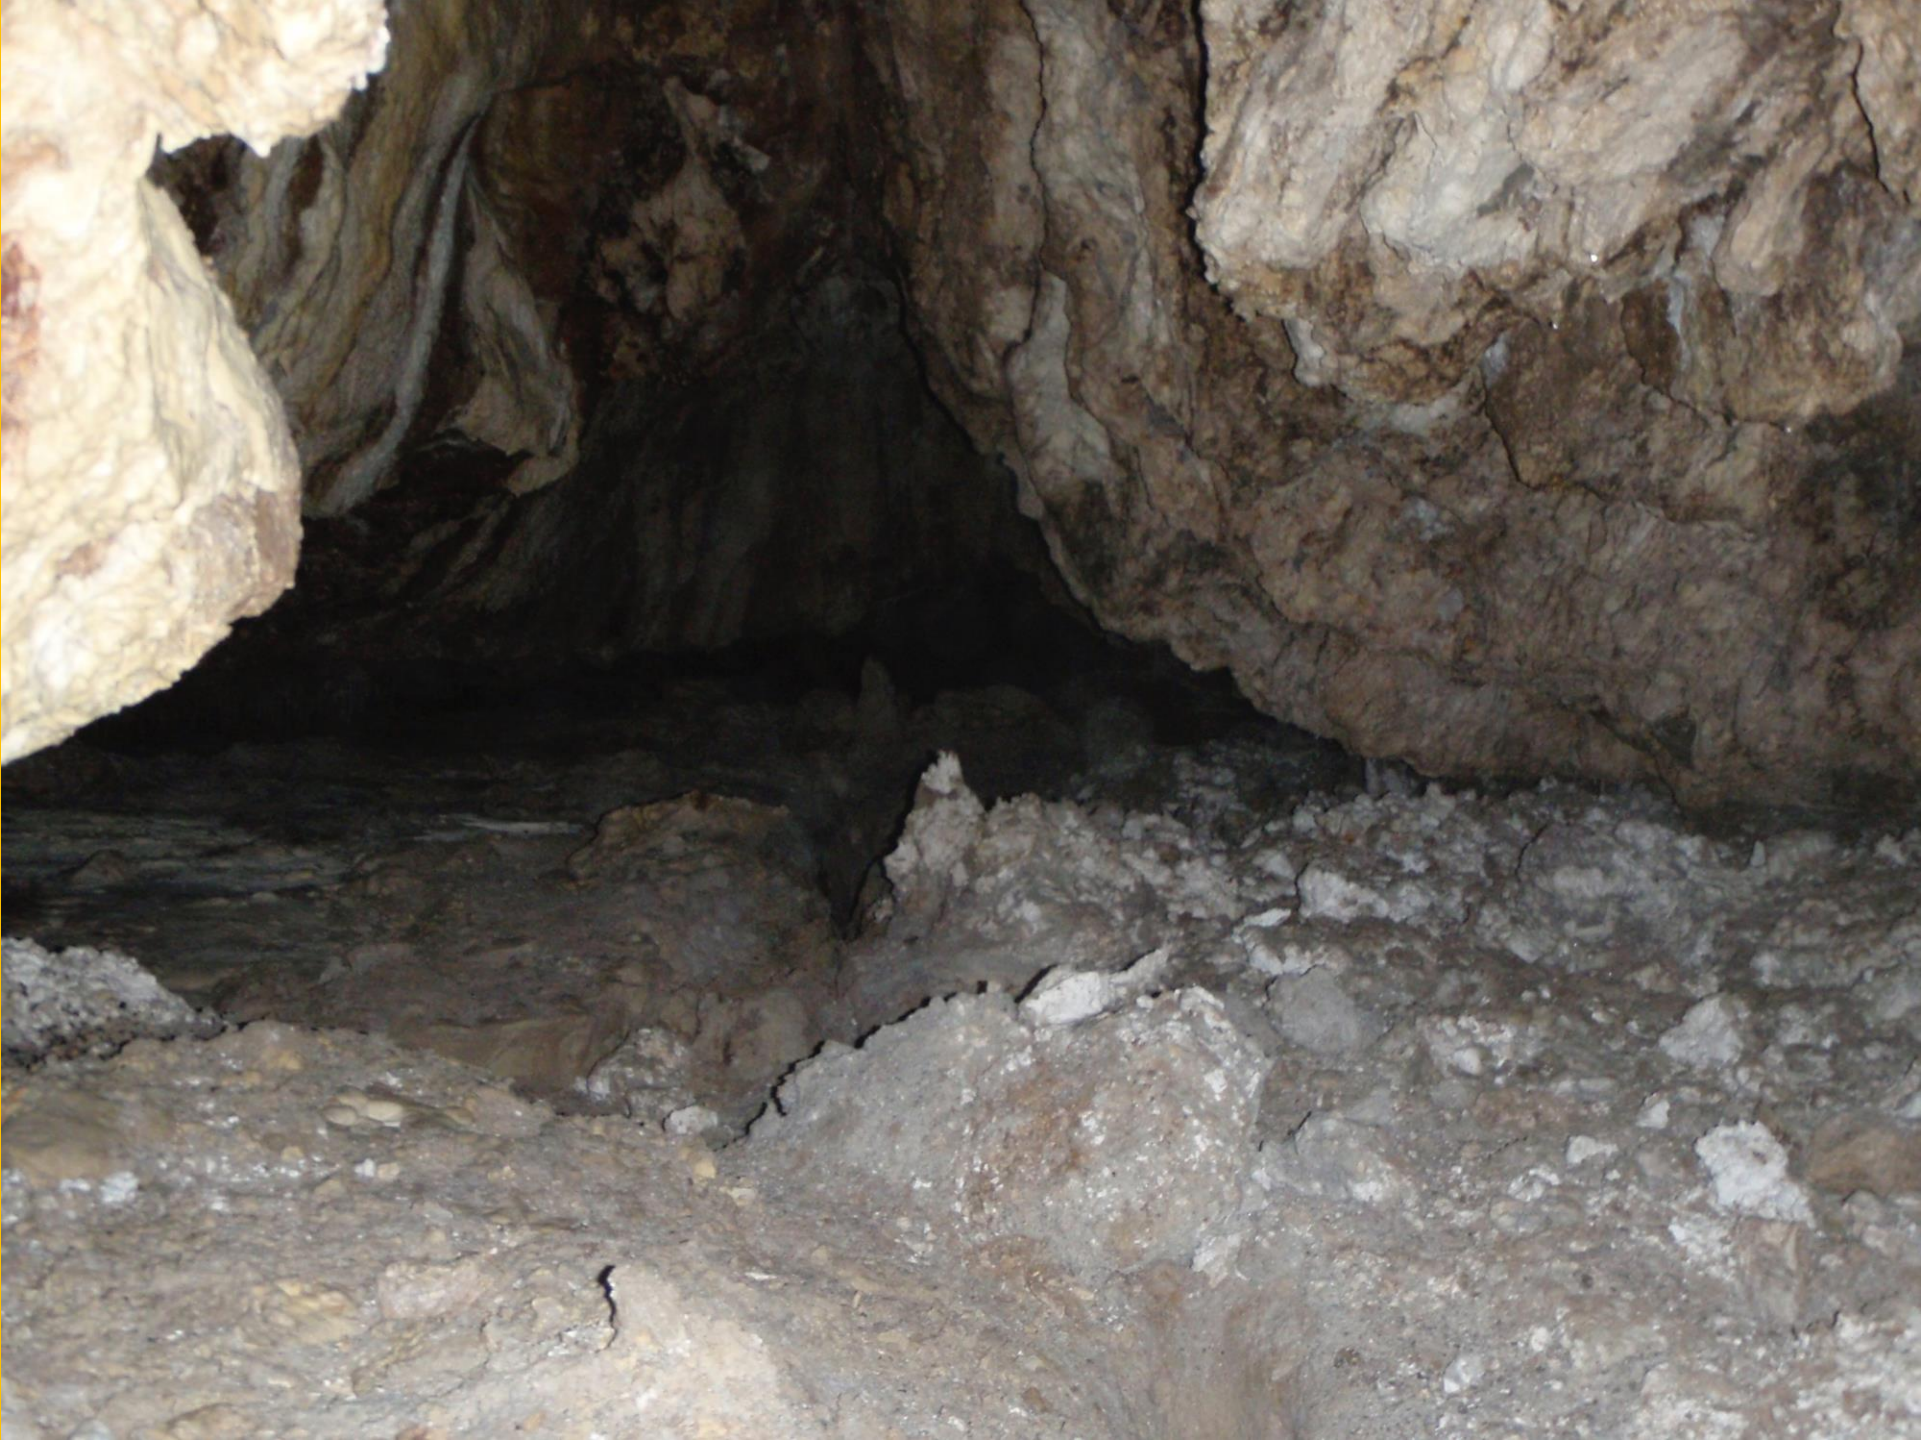

“Bug” cave

## Stop 4: Abisso Ancona and the tourist route



Things look very different in the older cave levels

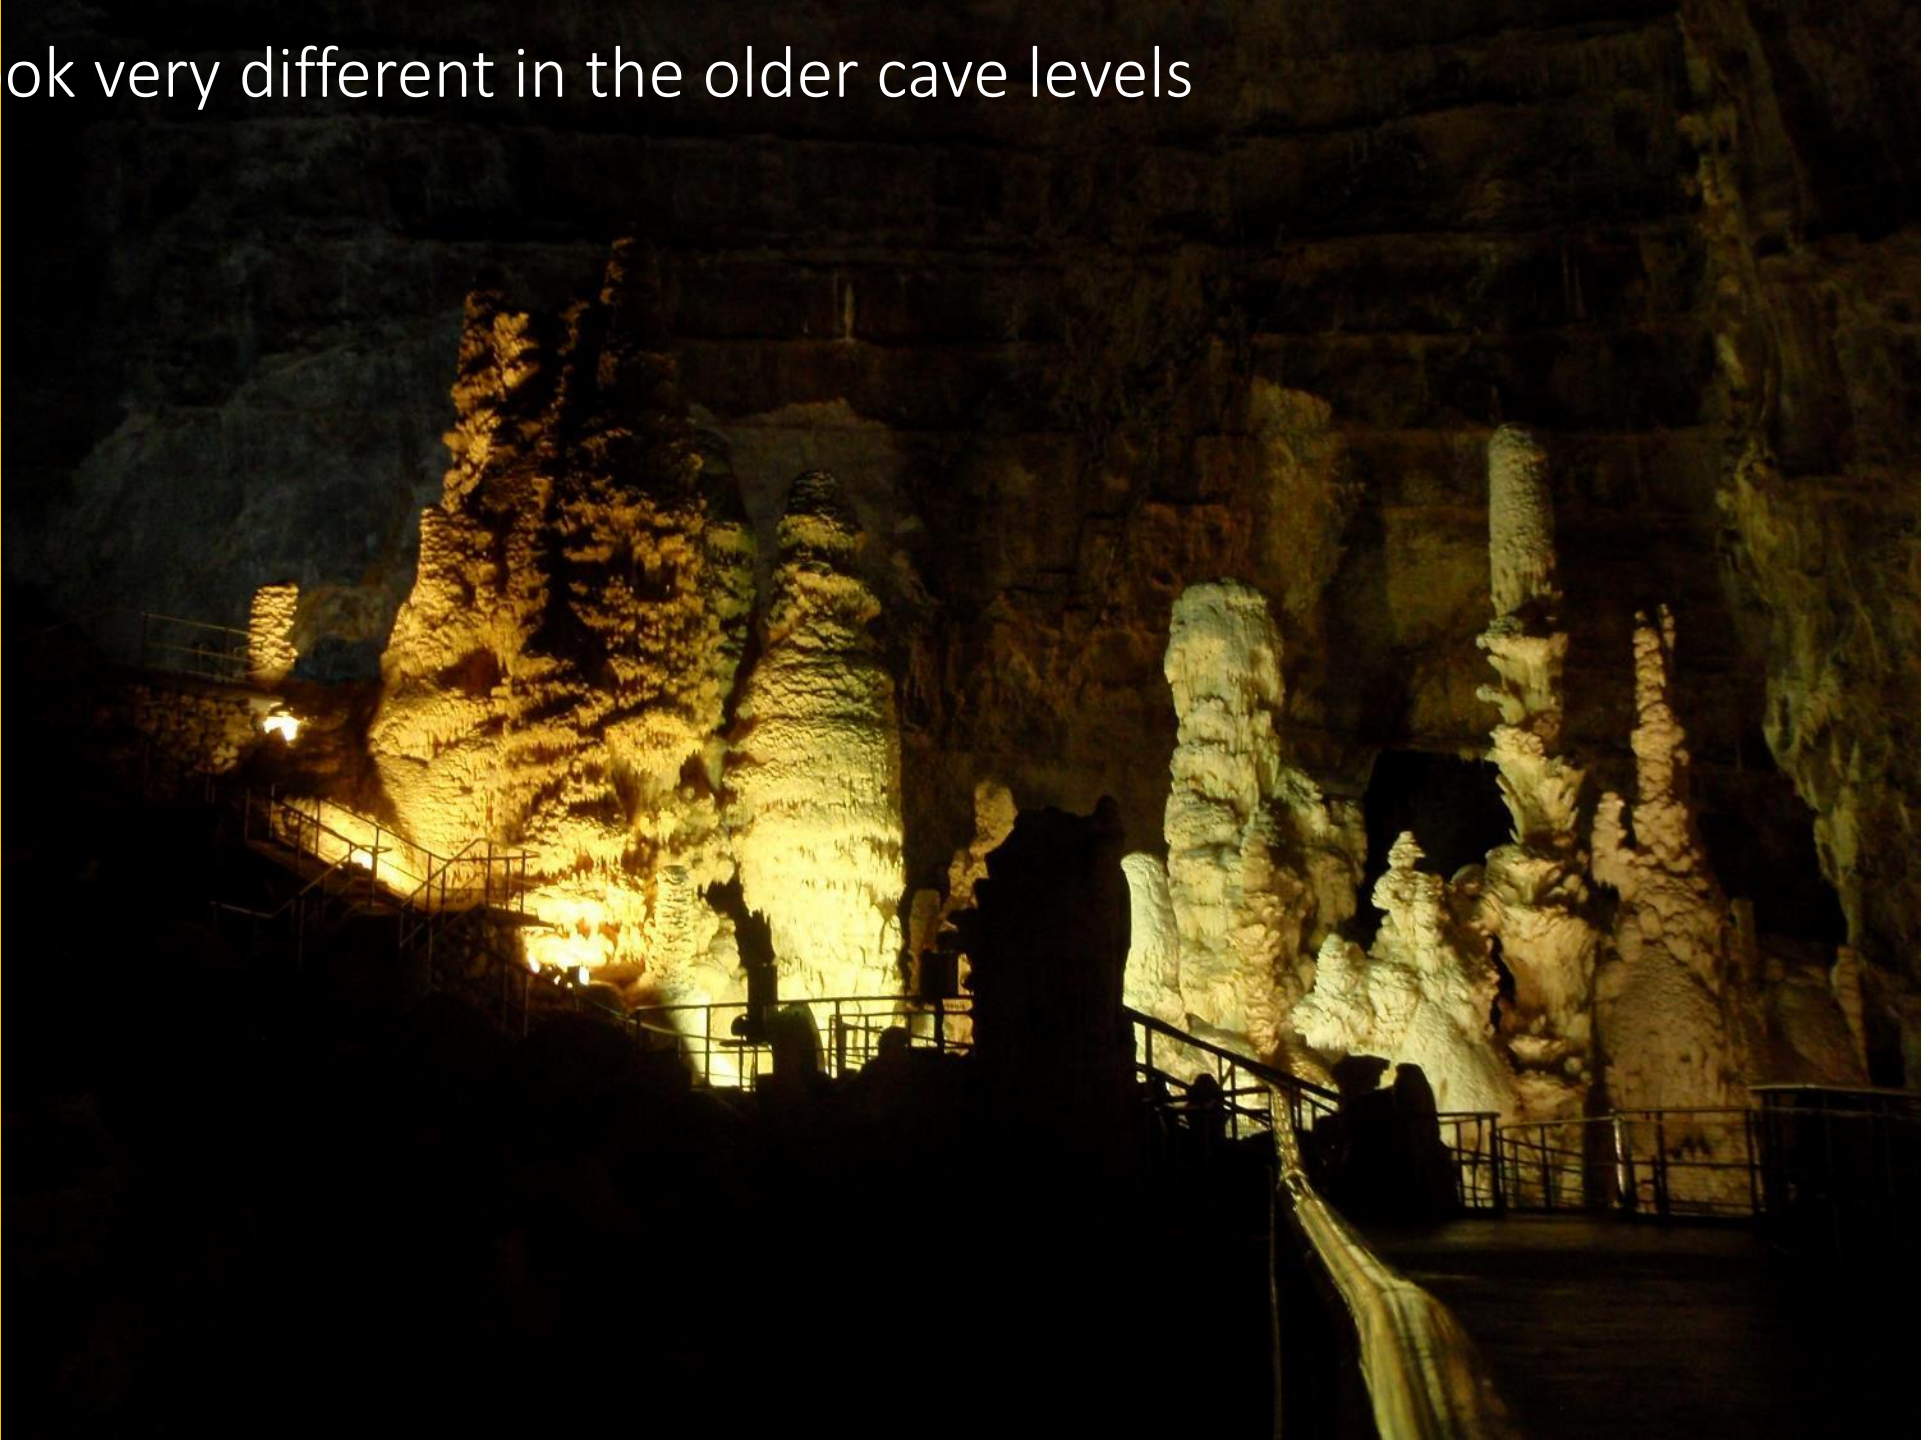

Things look very different in the older cave levels

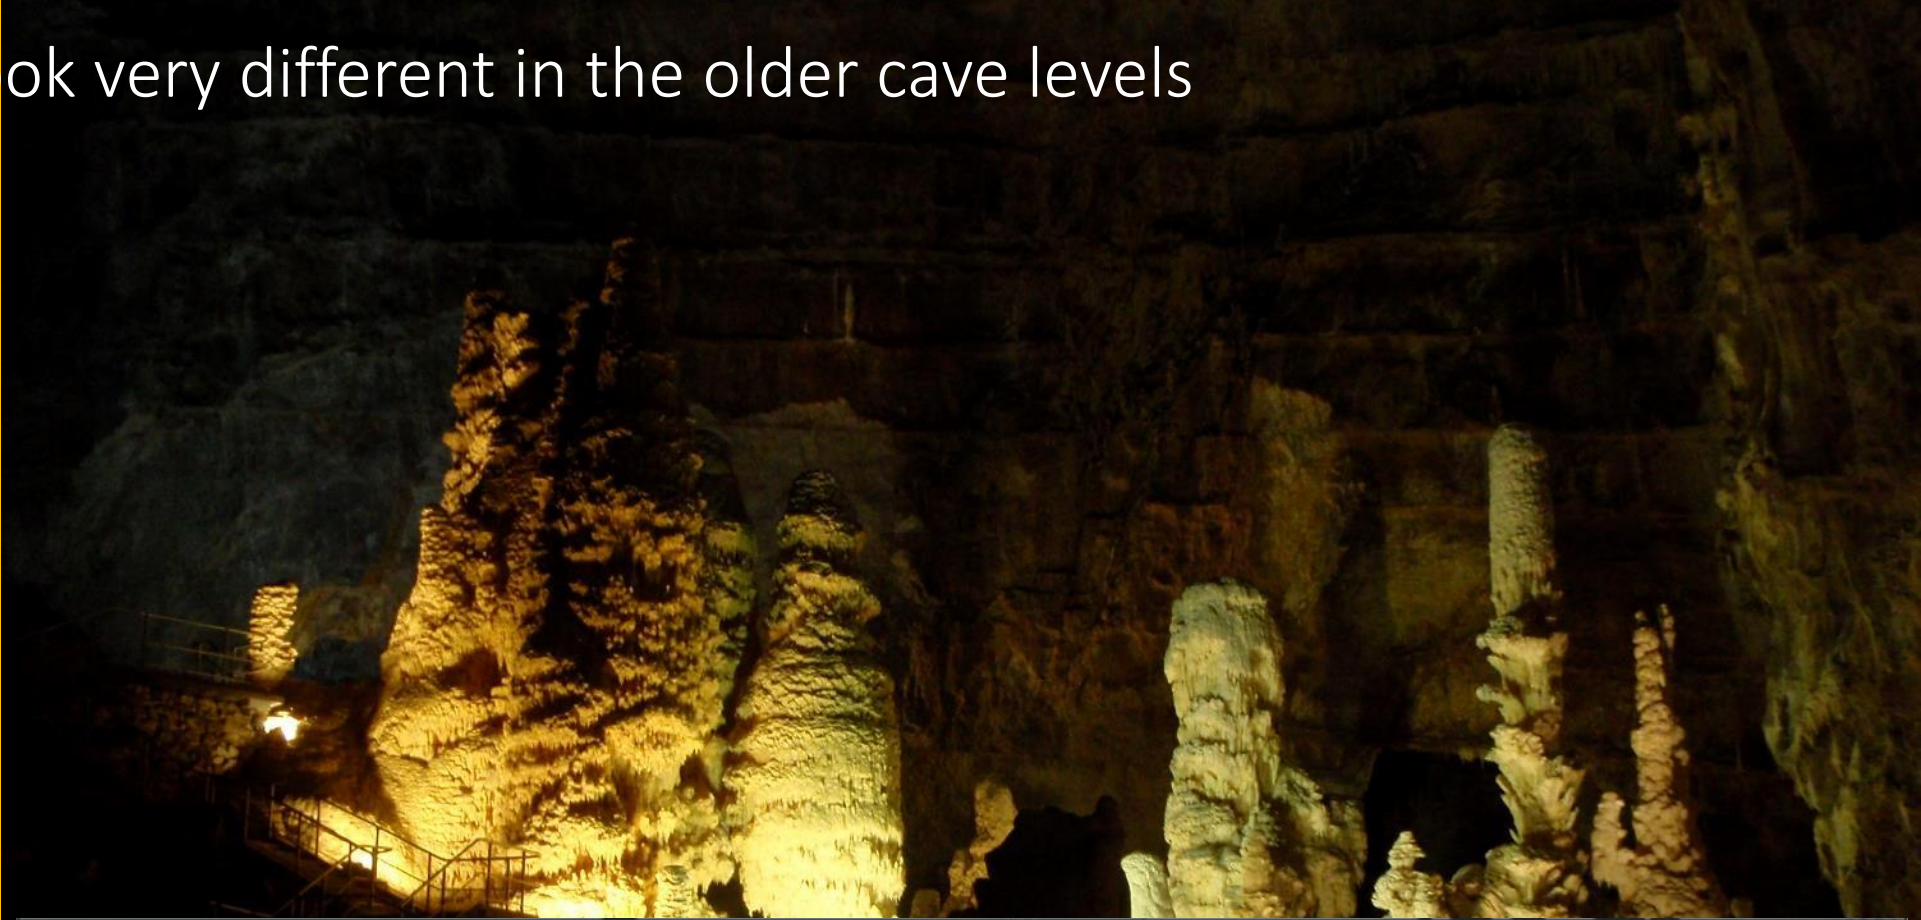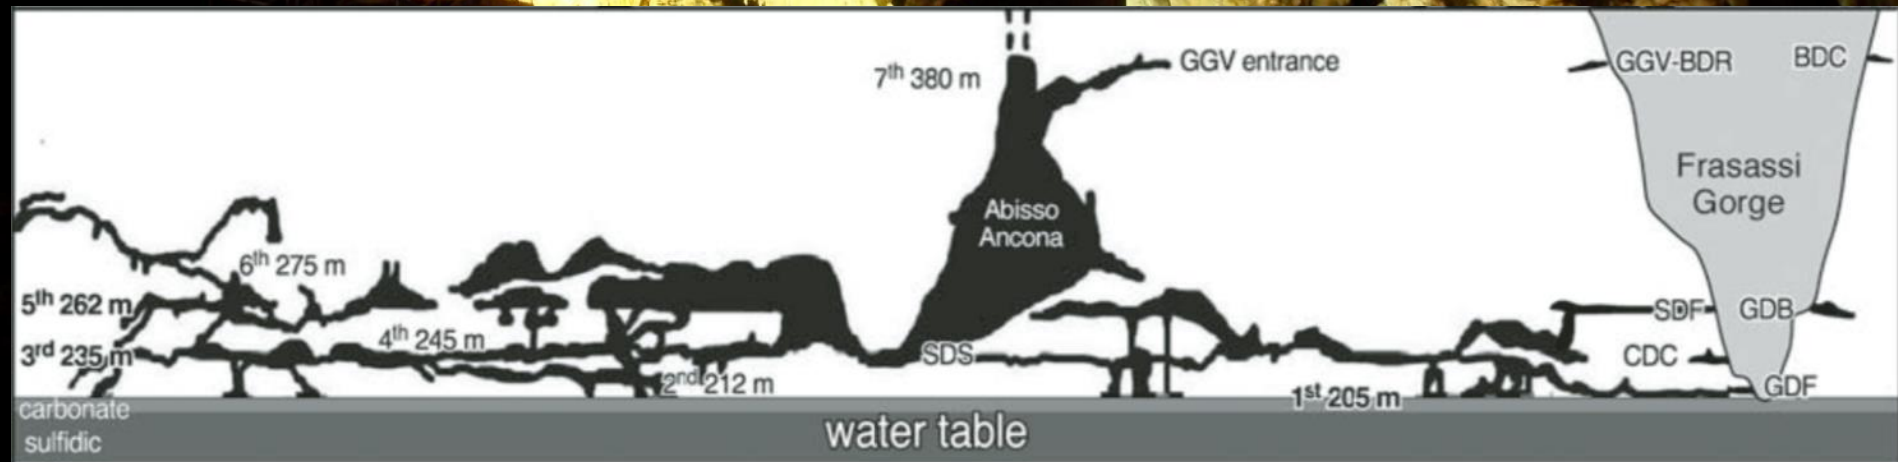

Things look very different in the older cave levels

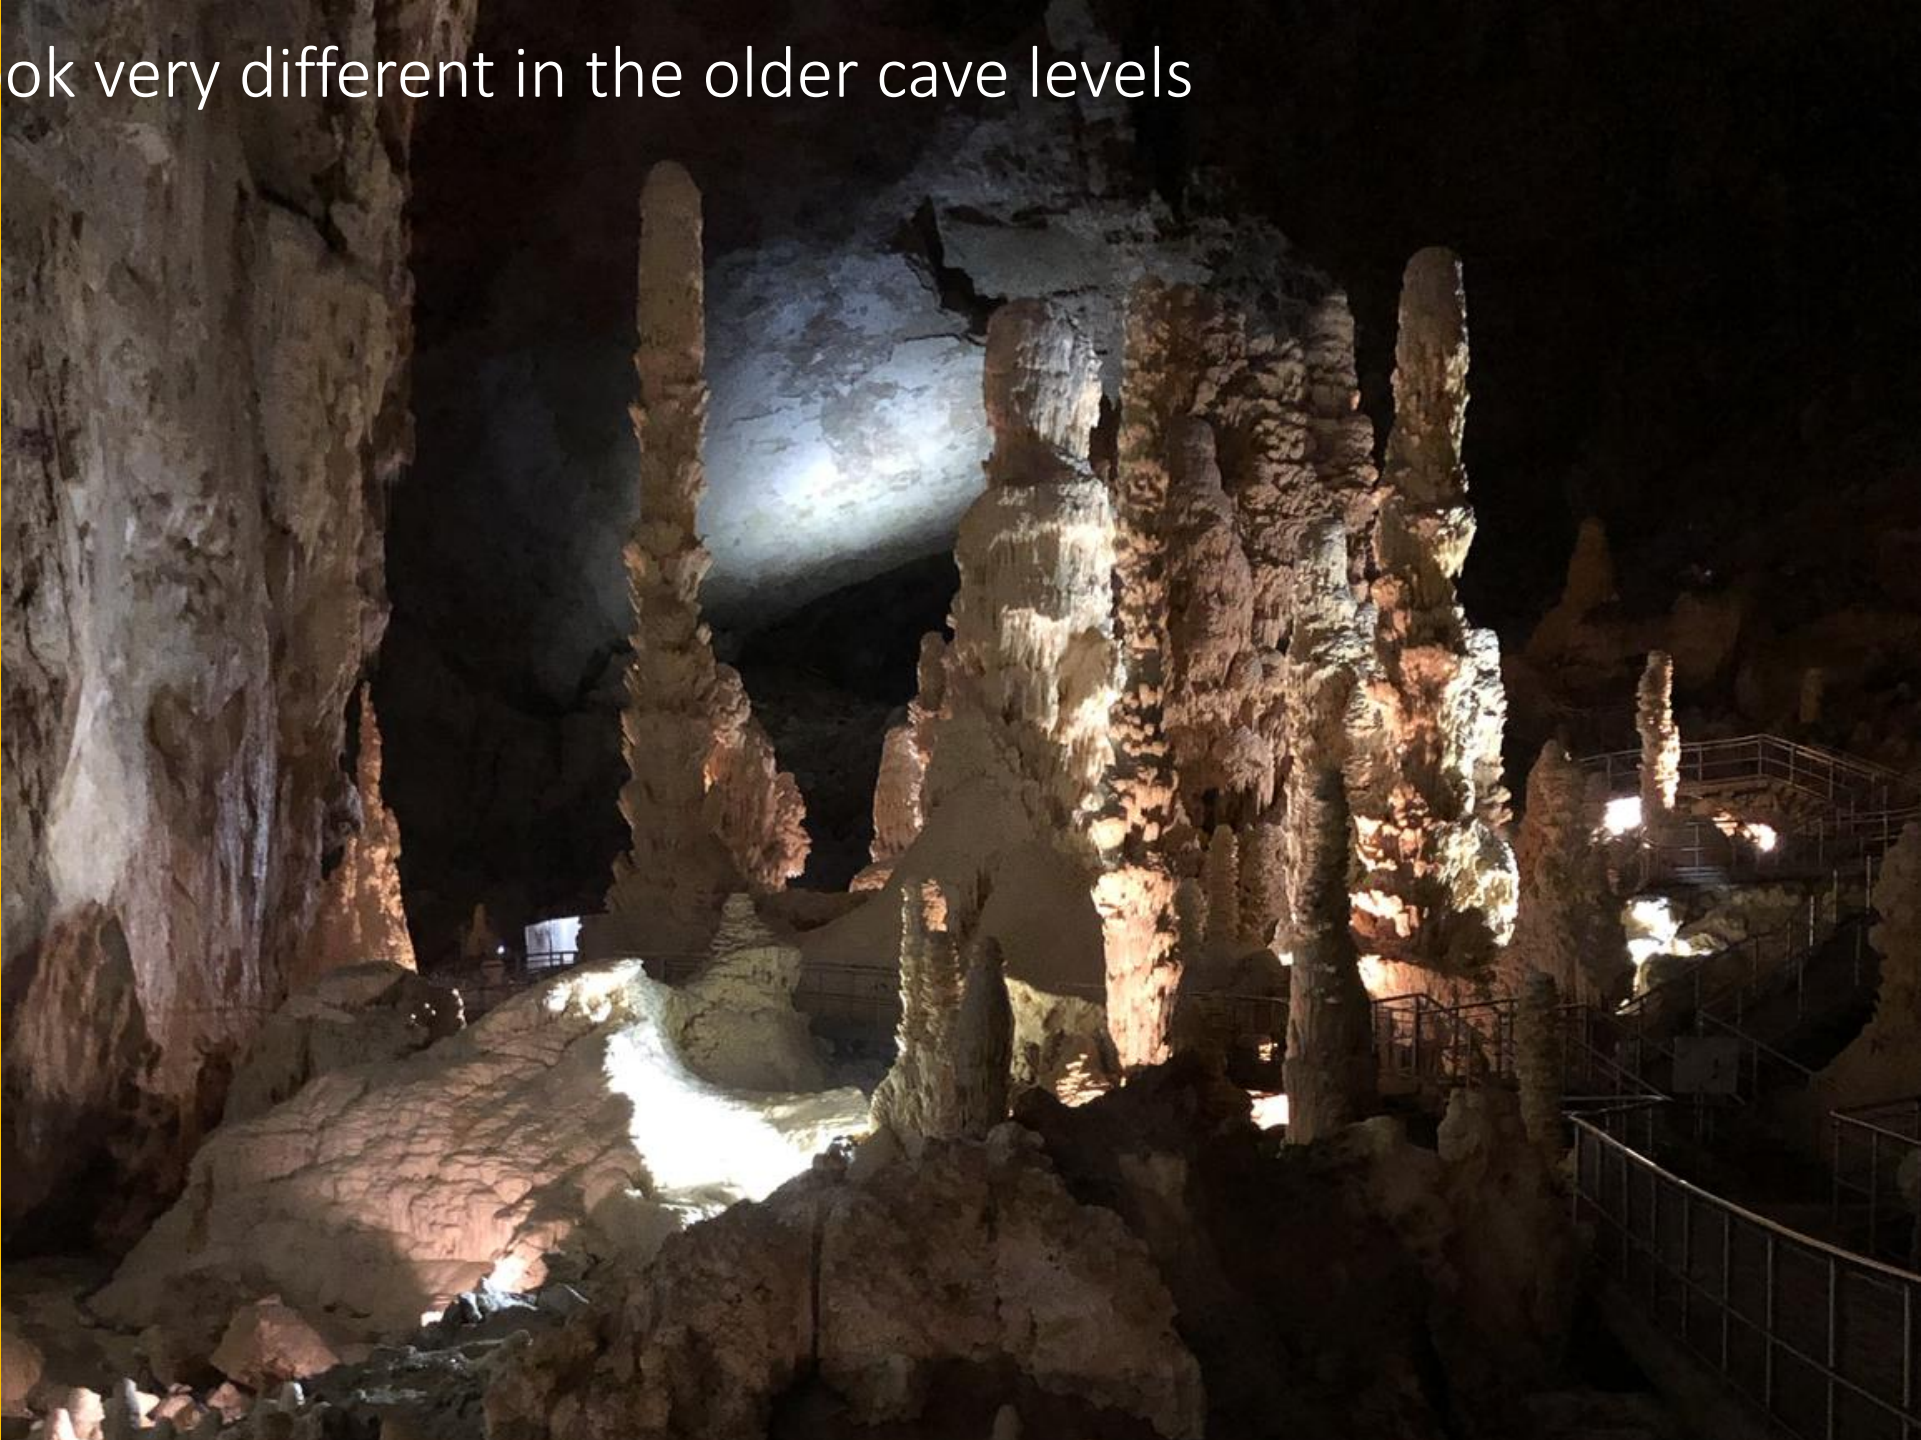

But there are still remnants of the cave's sulfidic past

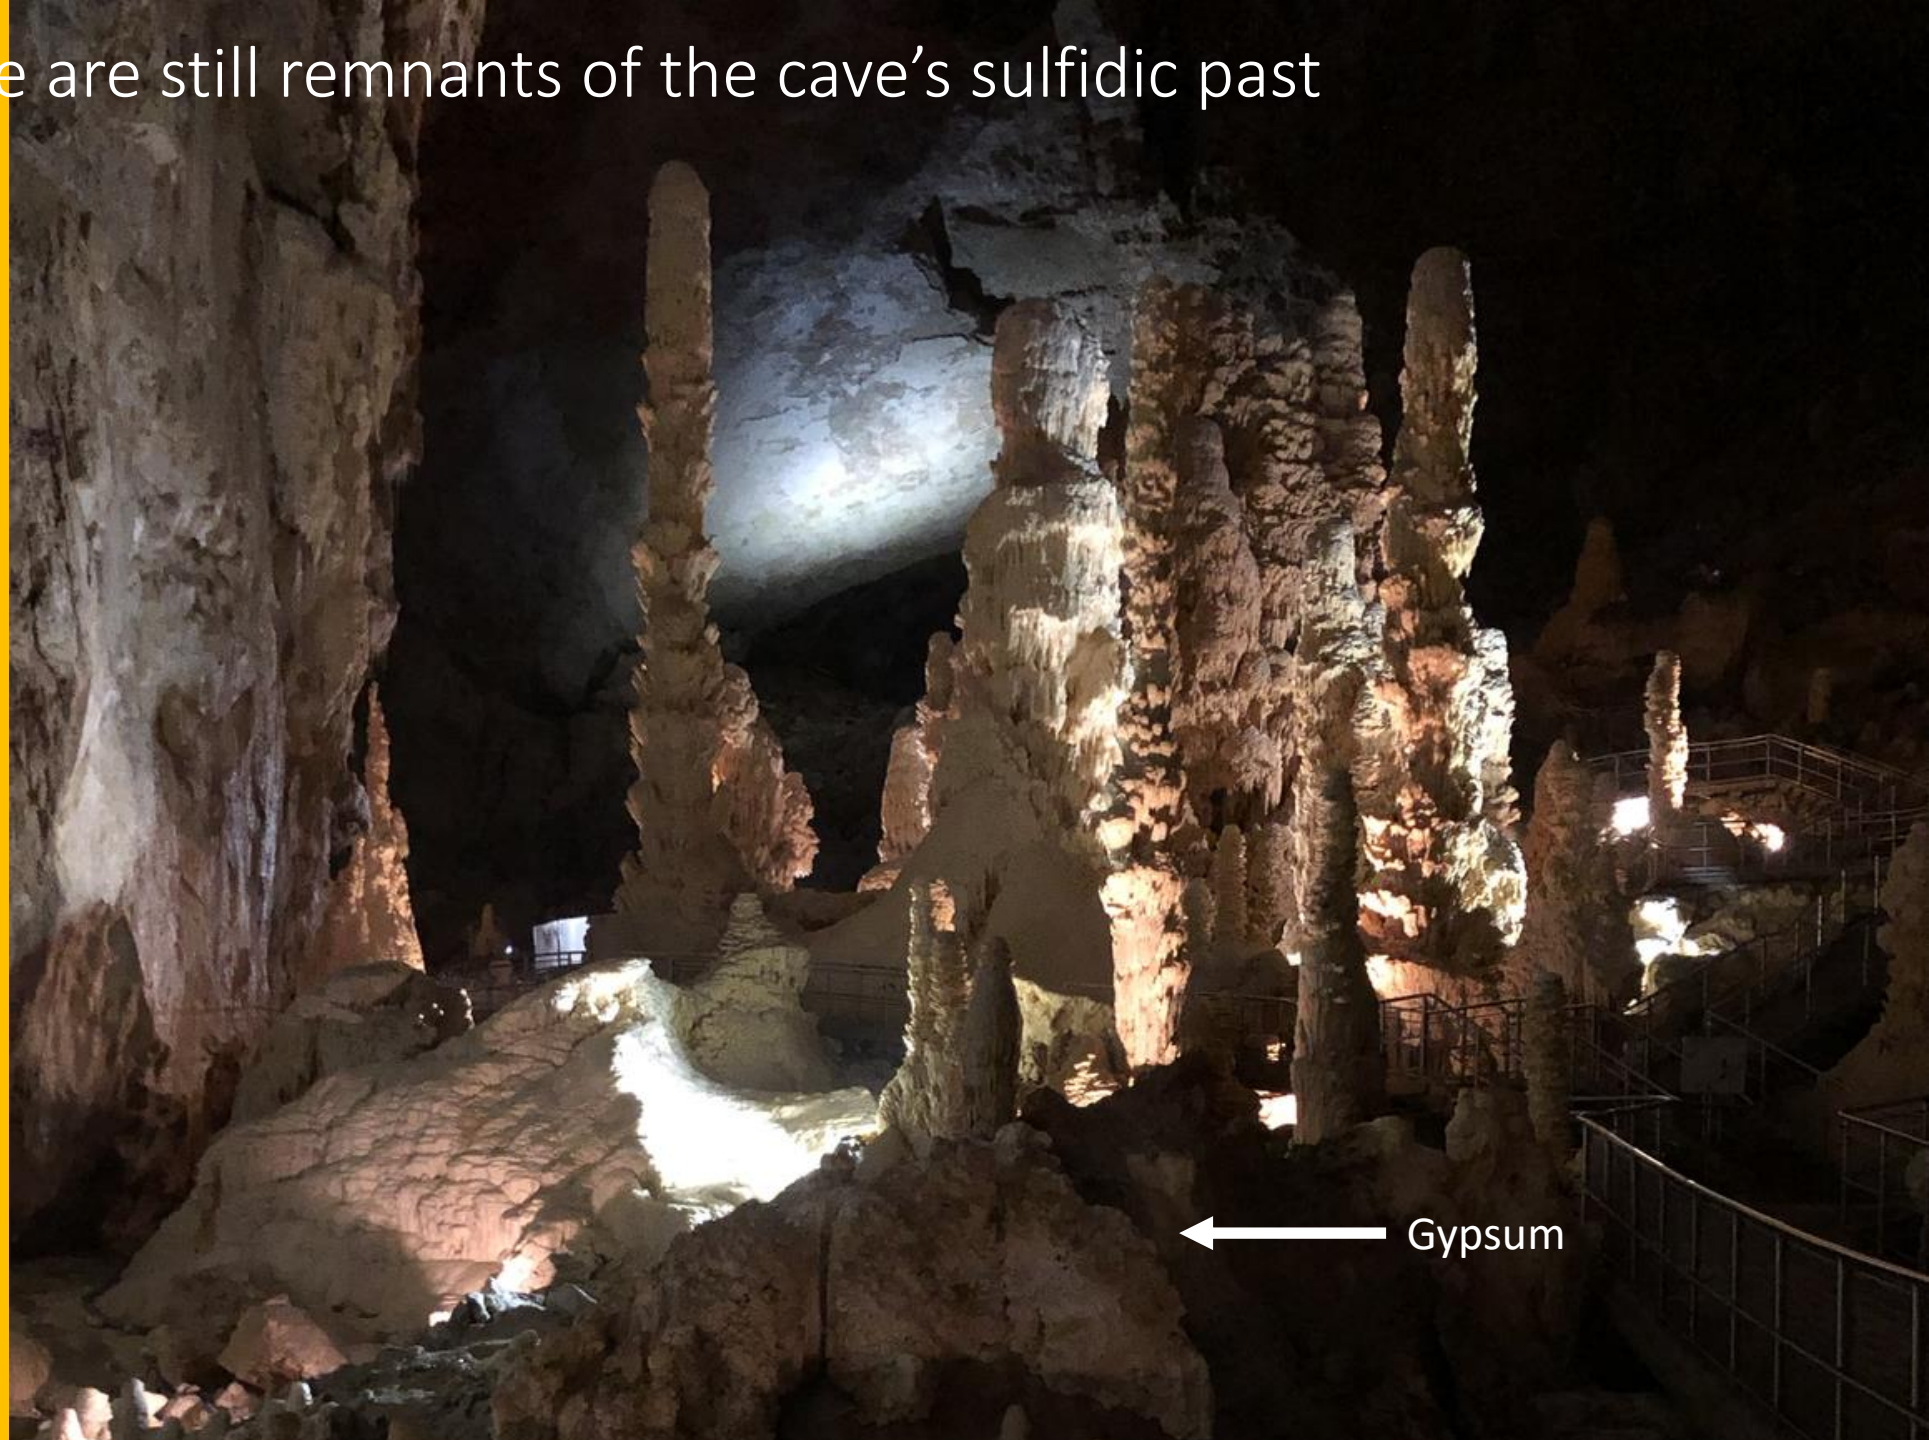

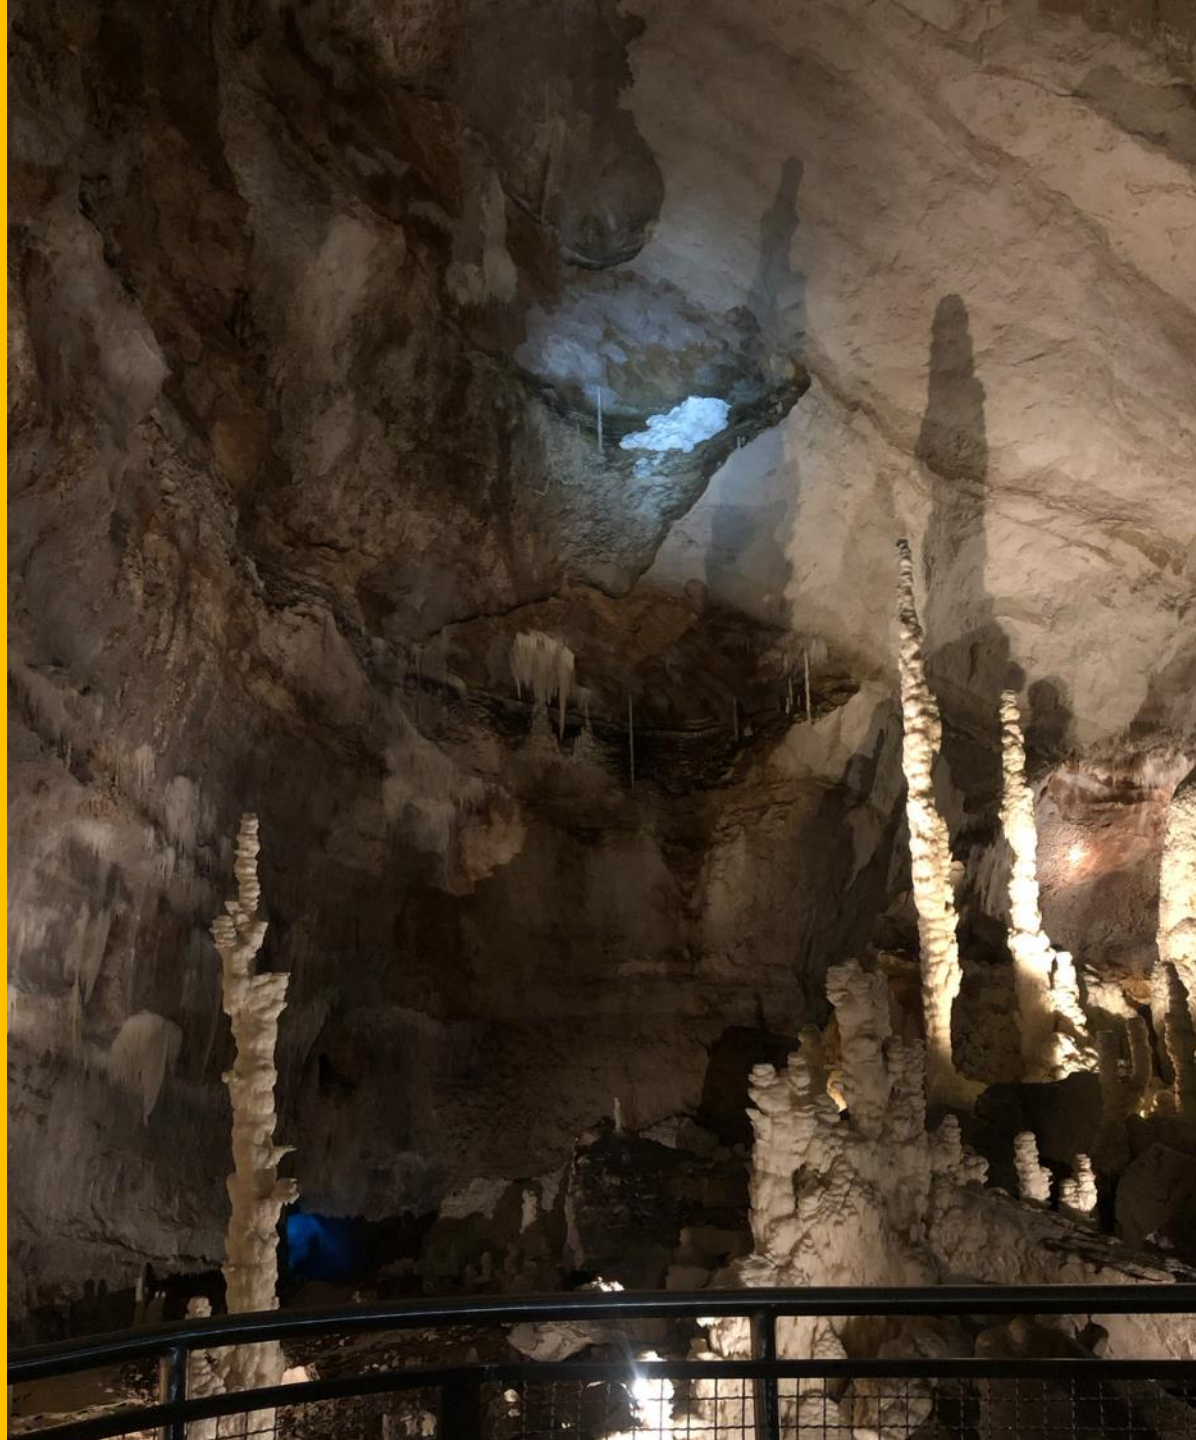

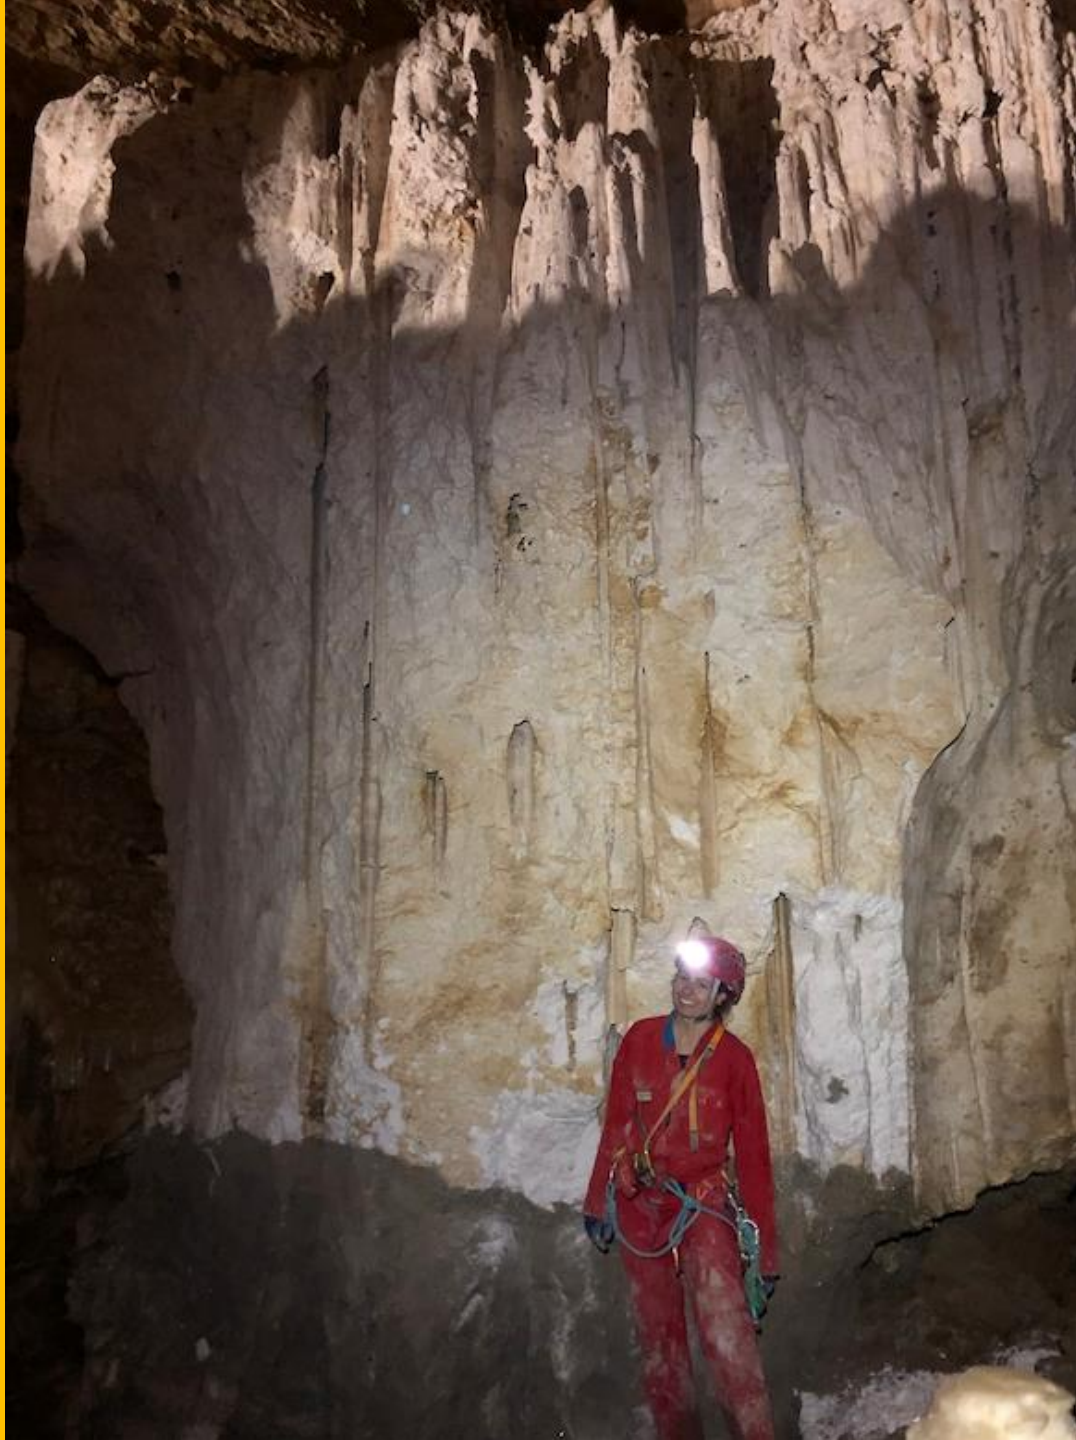

# Evolution of the Frasassi Caves

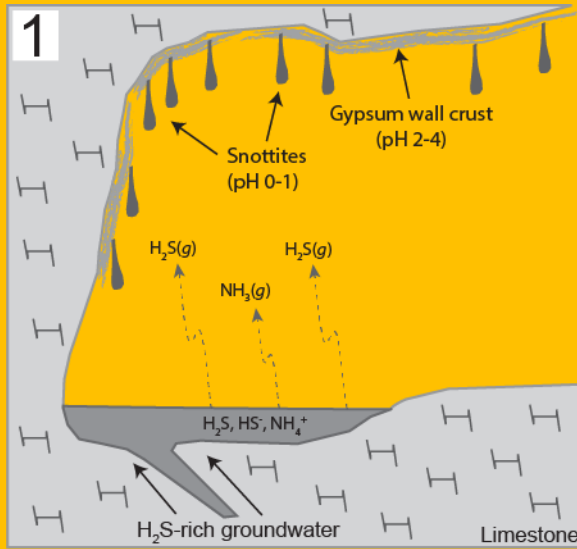

Time 1

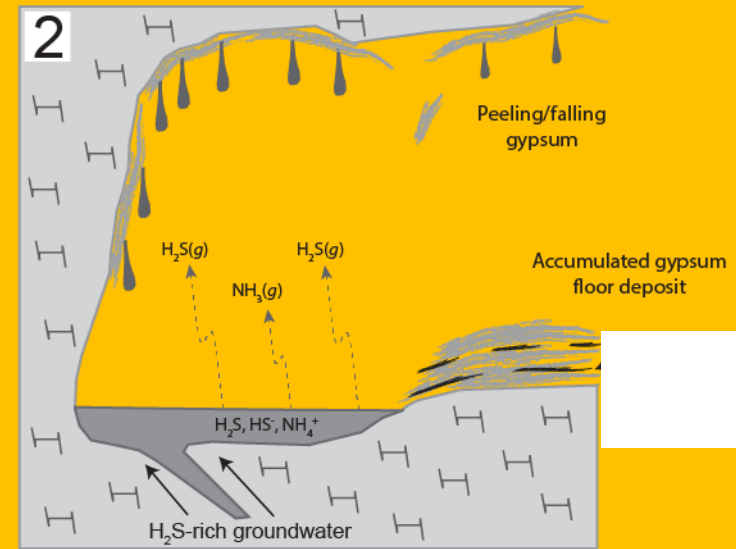

Time 2: 10s to 1000s of yrs from time 1

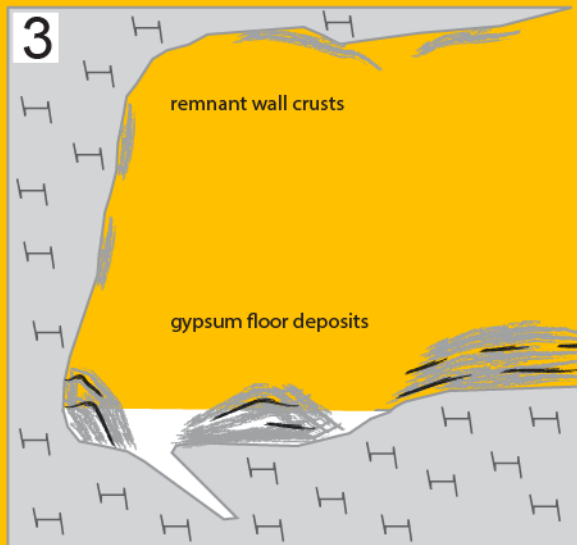

Time 3: 1,000s to 100,000s yrs from time 1

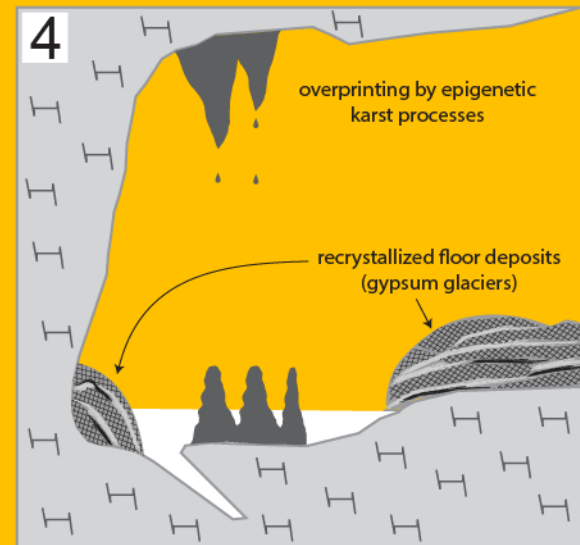

Time 4: 100,000s to millions yrs from time 1

## Stop 5: Artificial sulfidic spring along the tourist trail



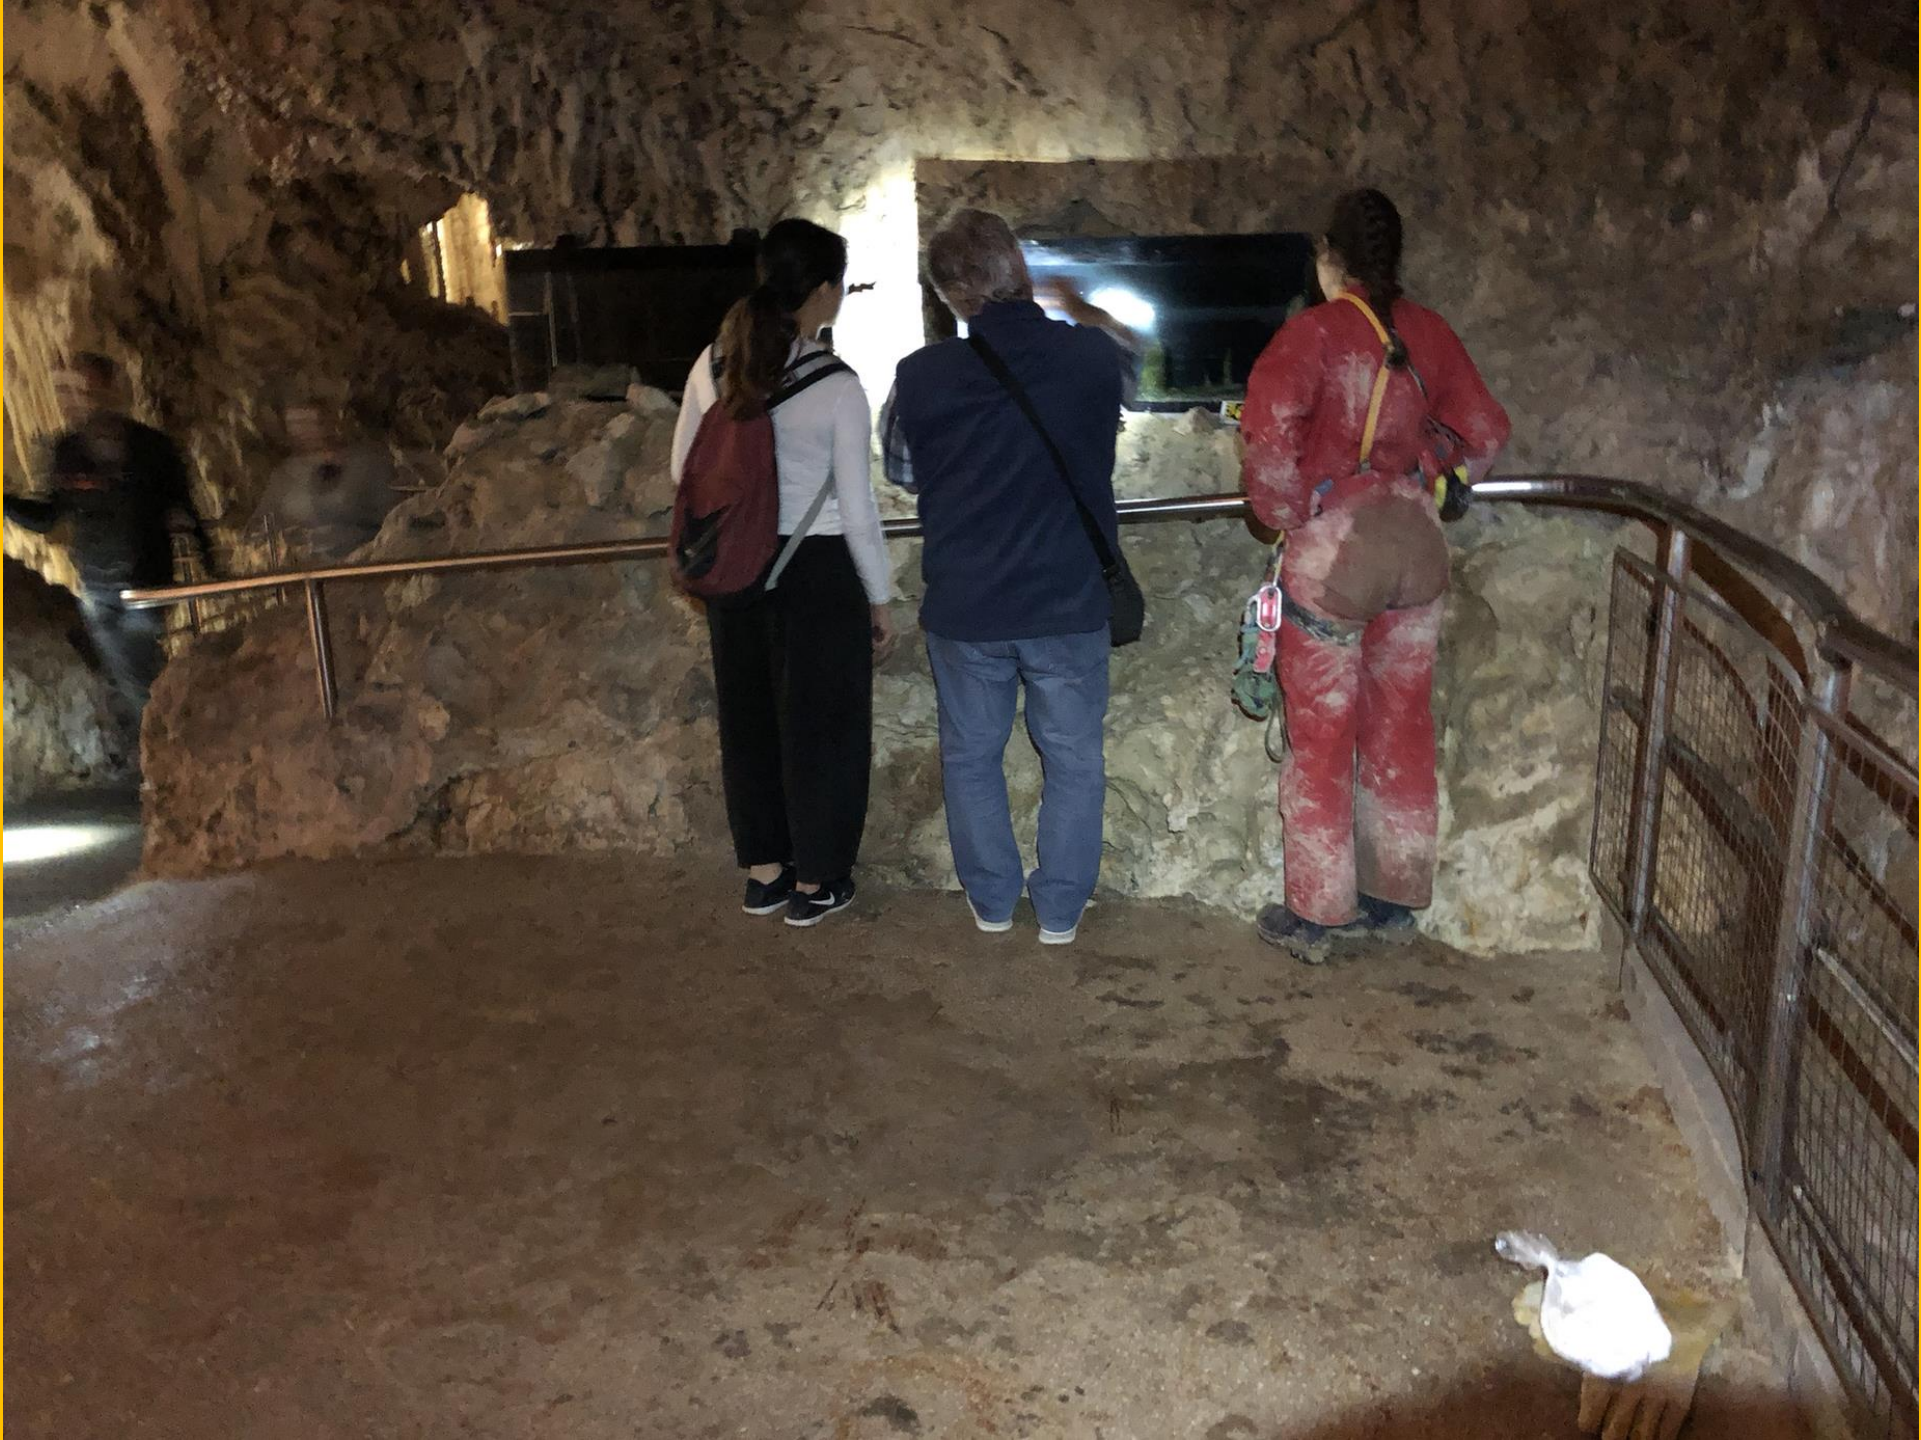

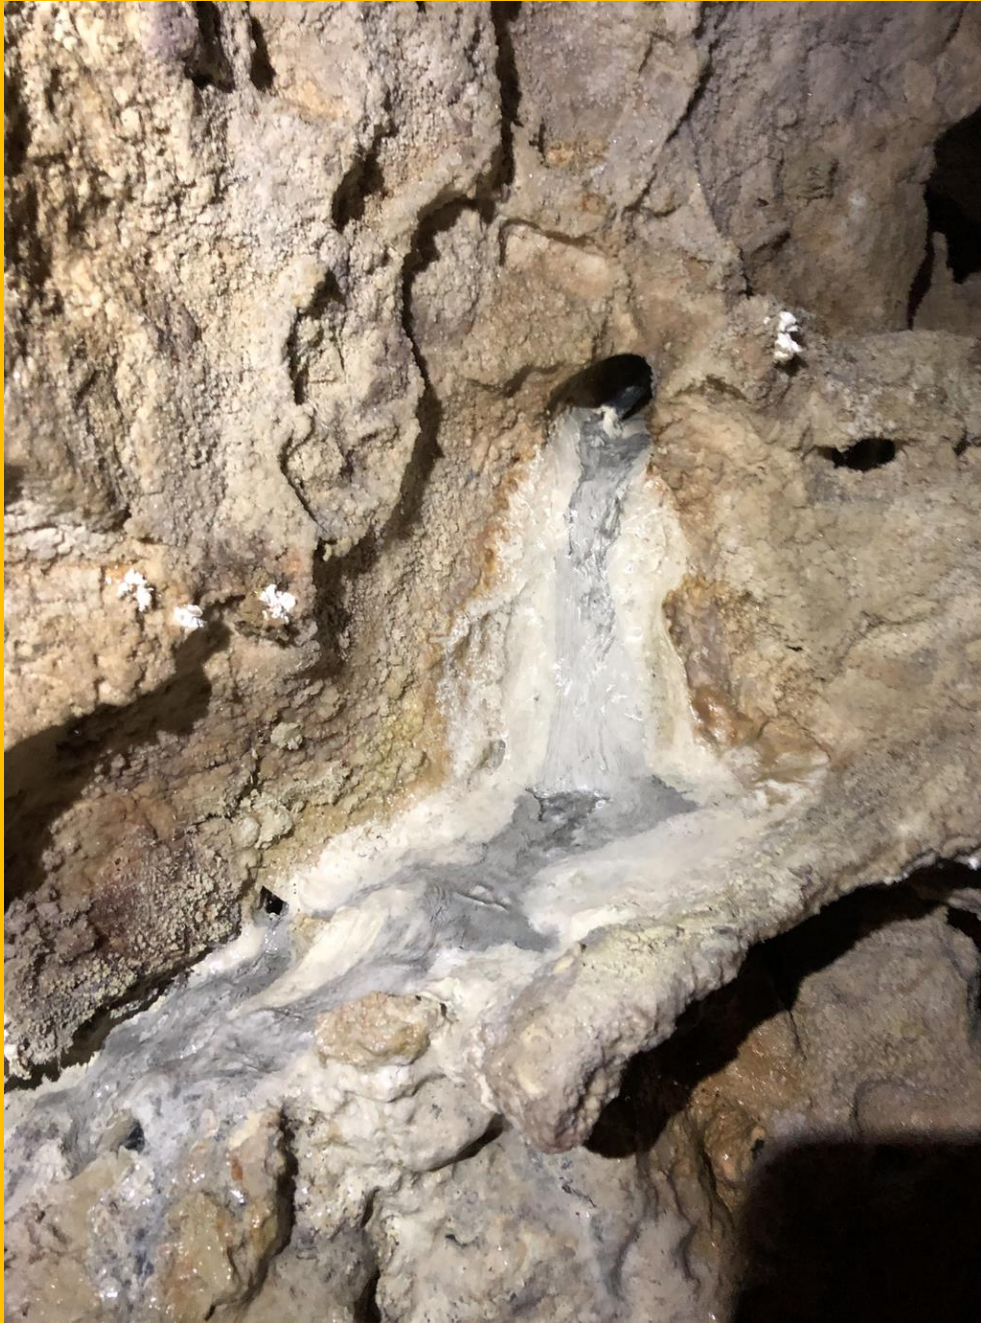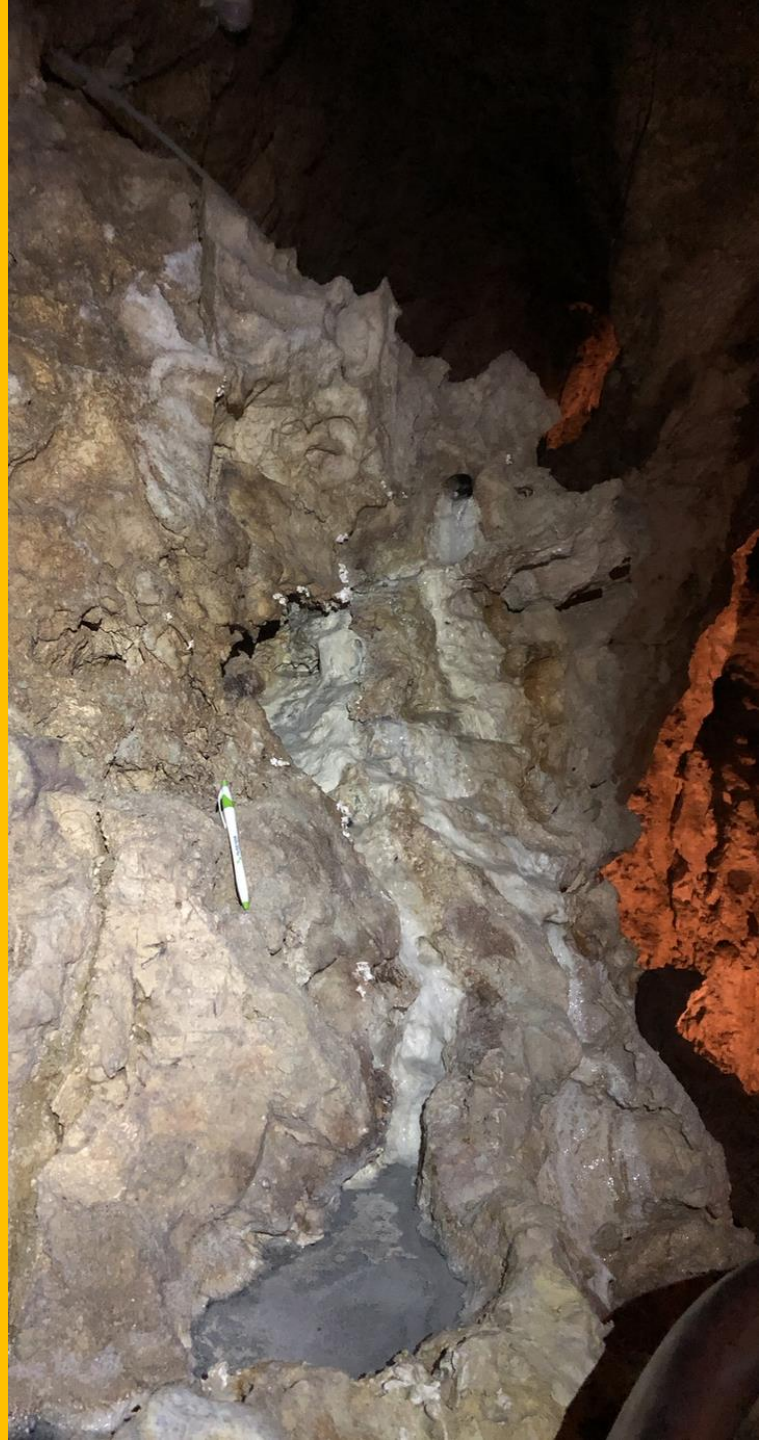

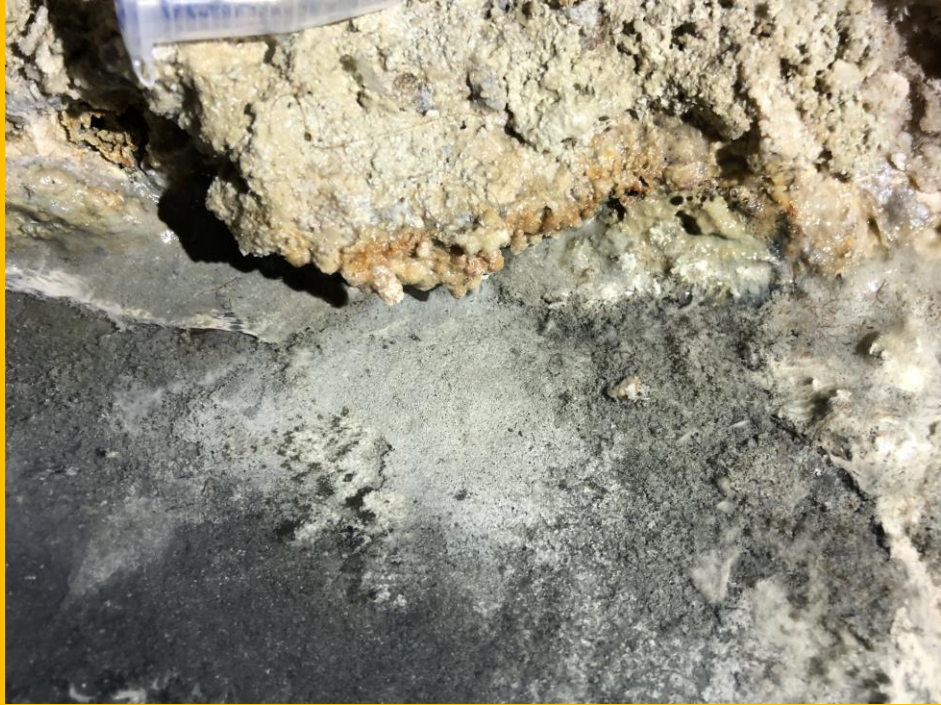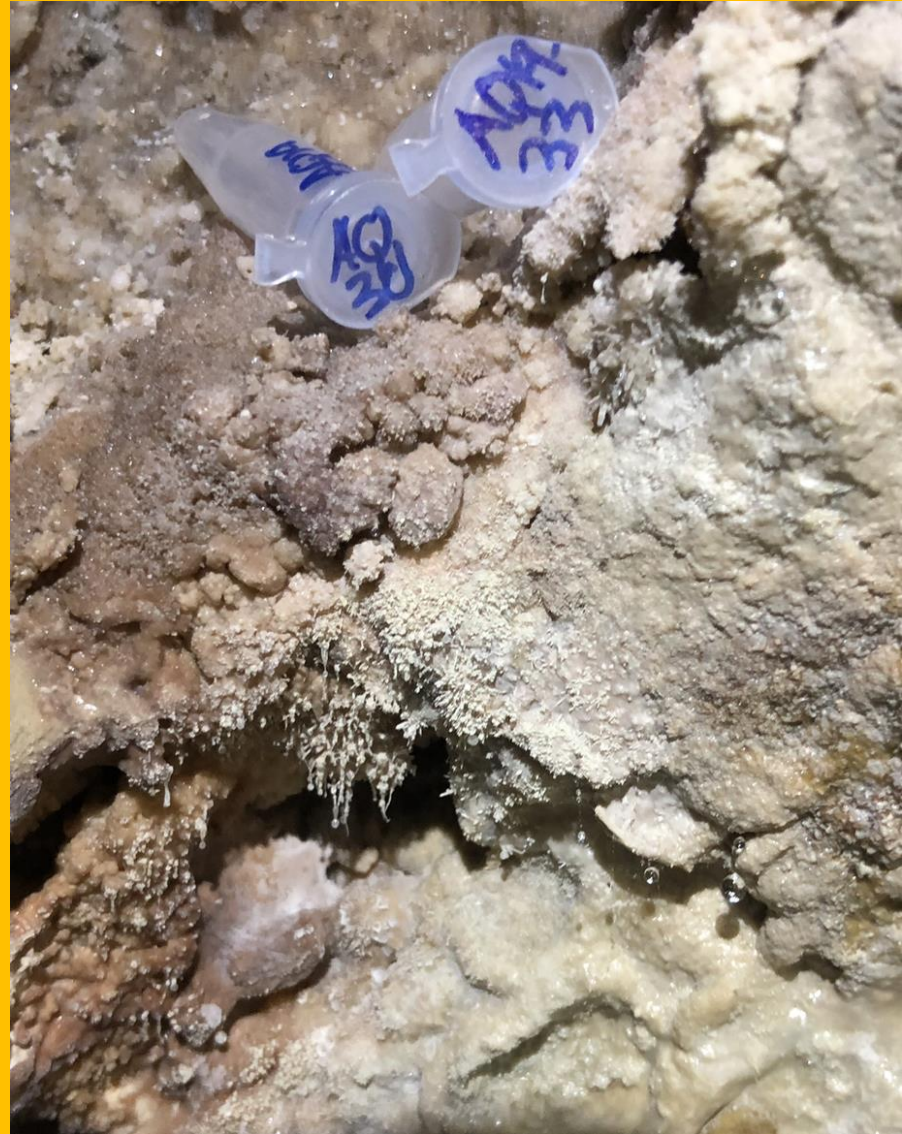

## Stop 6: The oldest levels (Grotta del Mezzogiorno-Grotta di Frasassi)



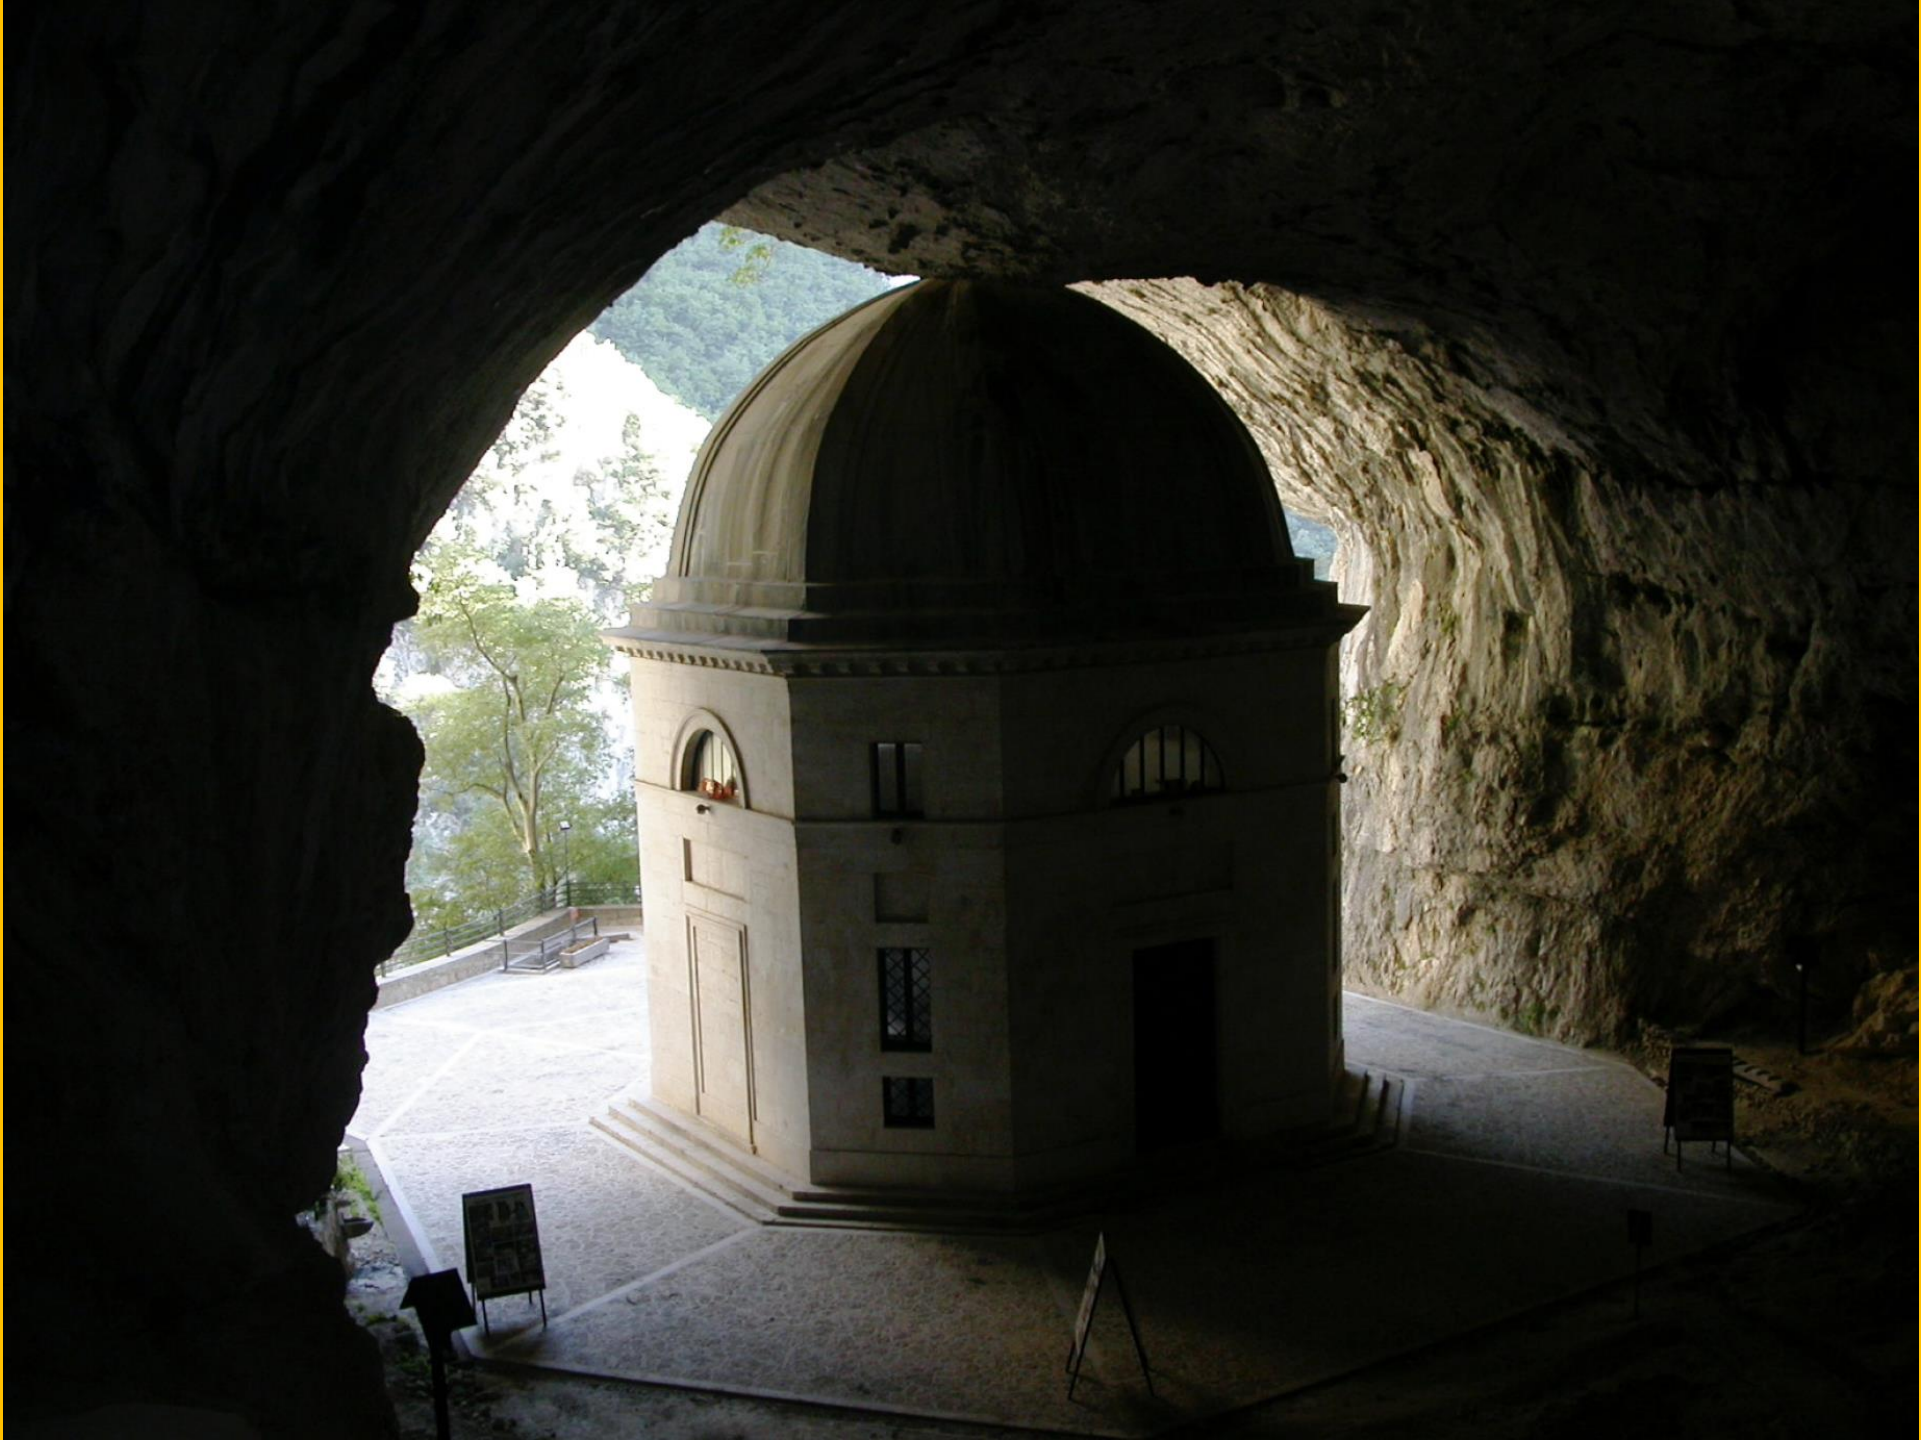

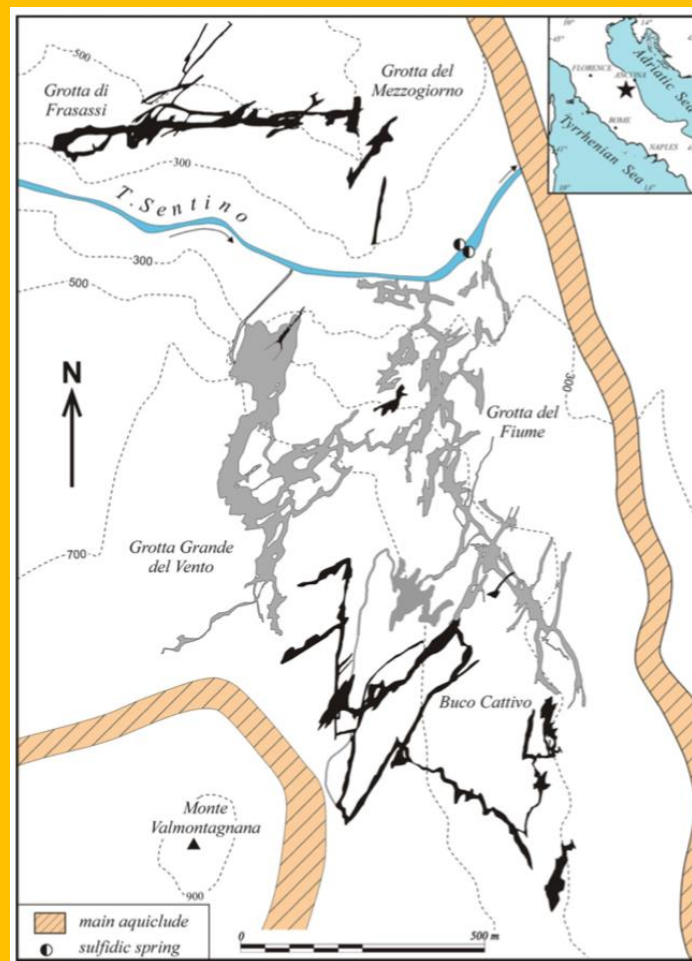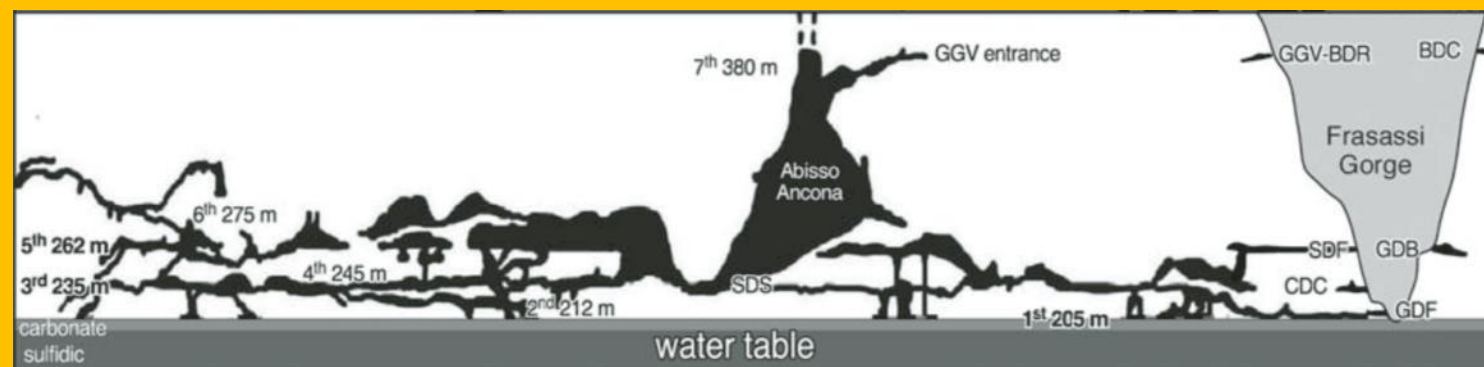

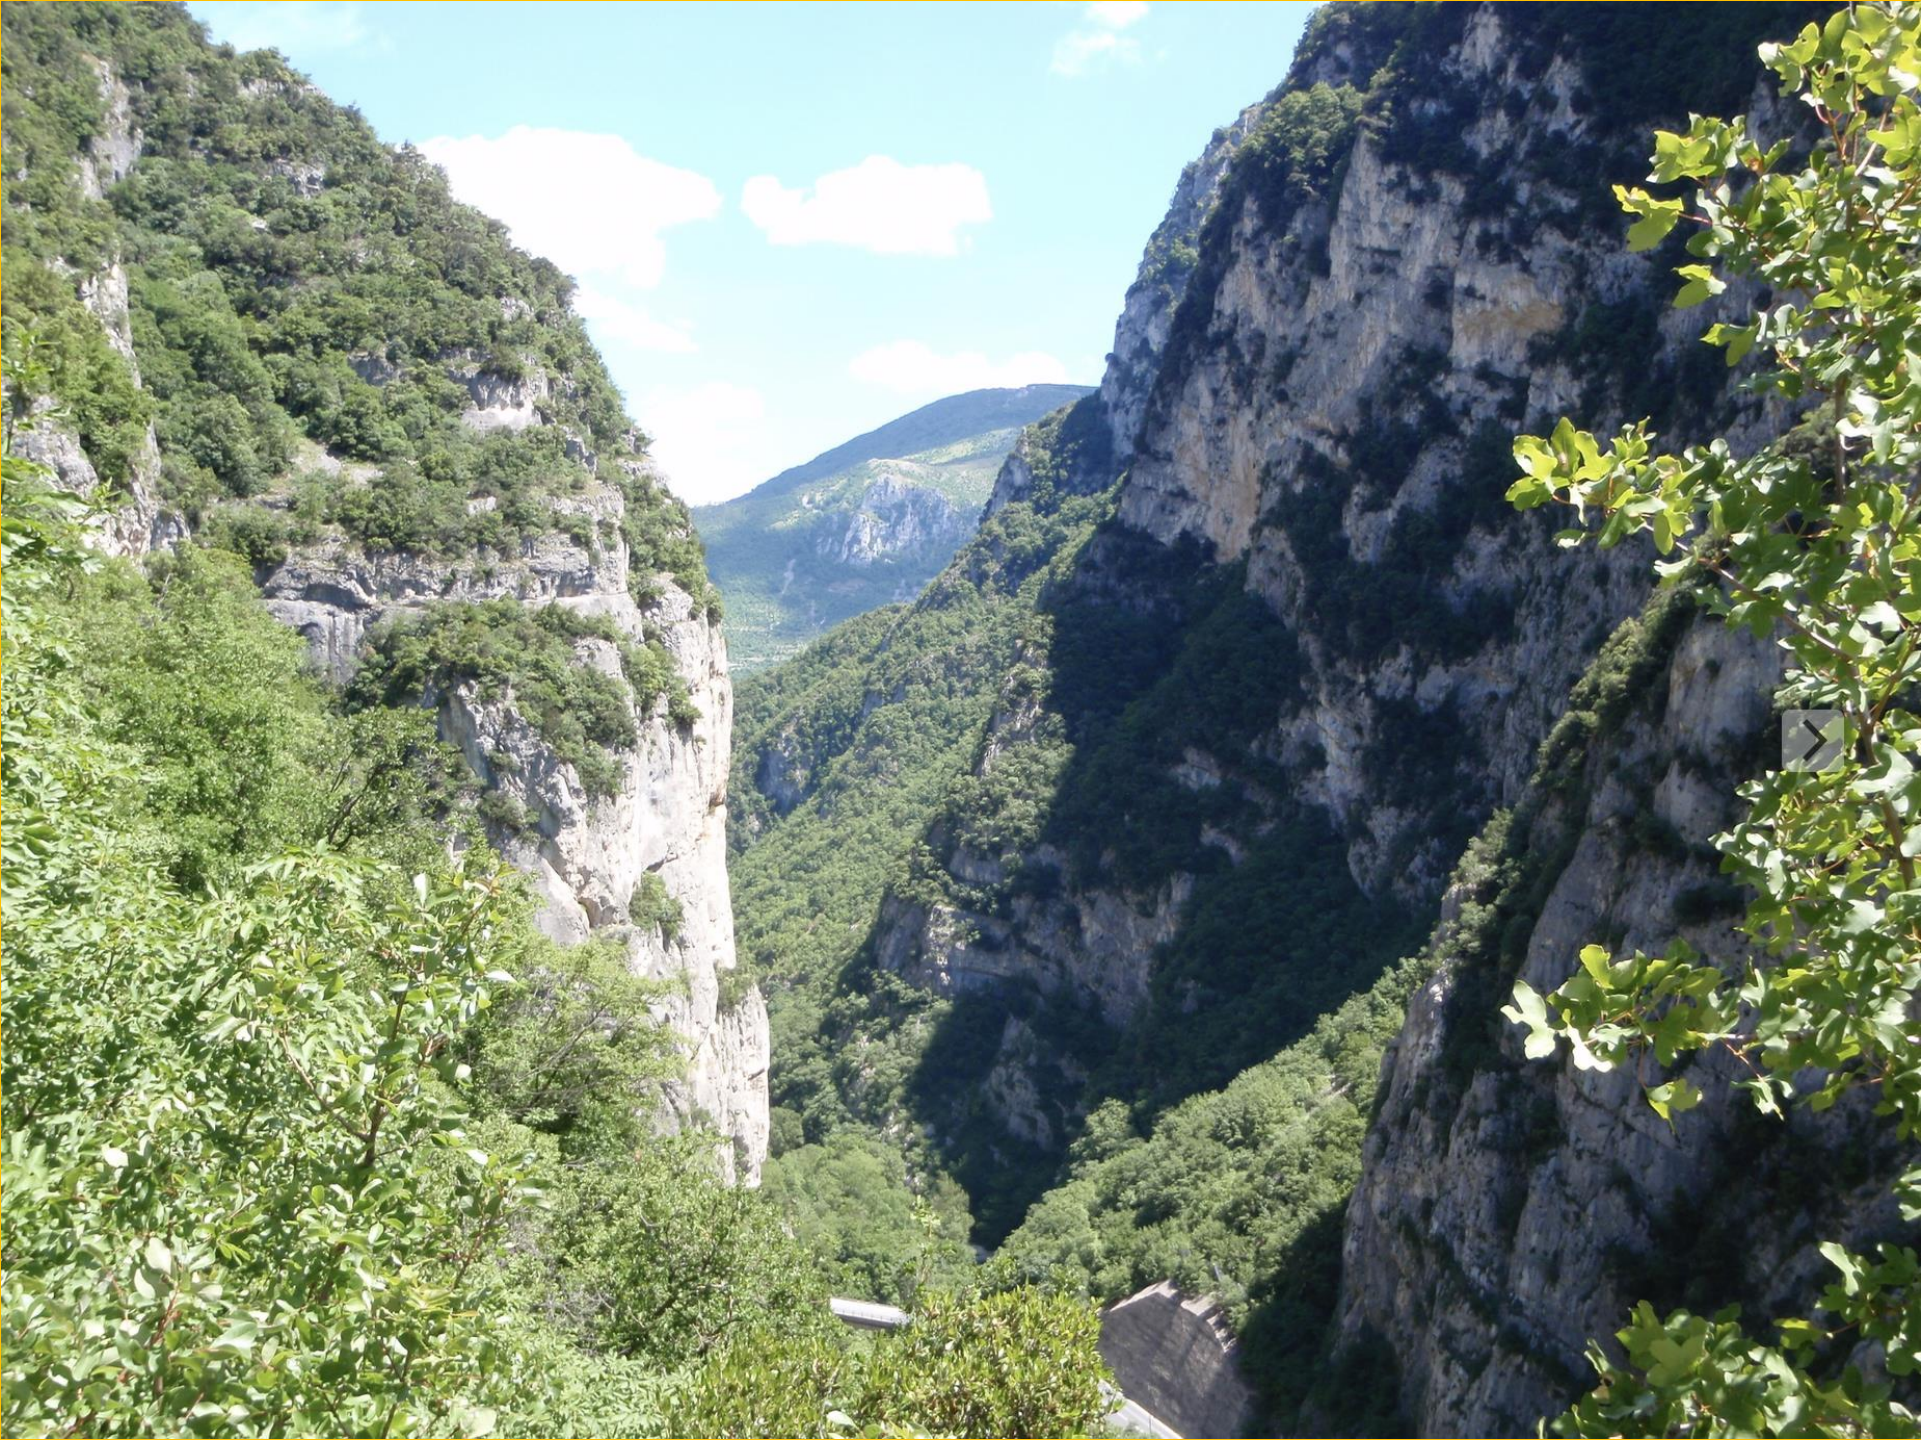

# CARLSBAD CAVERN, NEW MEXICO USA

- Introduction  
0900 PDT
- Stop 1 – Cueva de Villa Luz 0905 PDT
- Stop 2 – Frasassi Caves 0930 PDT
- **Stop 3 – Carlsbad Cavern** **0955 PDT**  
**Harvey Duchene**
- Stop 4 – Lechuguilla Cave 1015 PDT
- Stop 5 – Sacramento Pass 1035 PDT
- Break/Intermission PDT 1055
- Stop 6 – Lehman Caves 1105 PDT
- Break/Intermission PDT 1245
- Stop 7 – Burial Cave PDT 1255
- Stop 8 – Crystal Ball Cave 1305 PDT
- Stop 9 - Pescio Cave PDT 1315
- Stop 10 – Discovery Cave 1325 PDT
- Stop 11 – Old Mans Cave 1335 PDT
- Summary and questions 1345 PDT

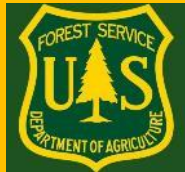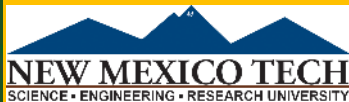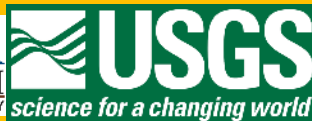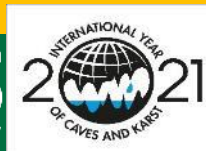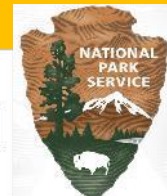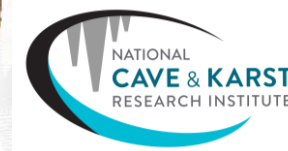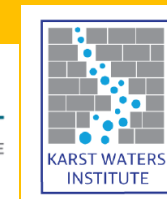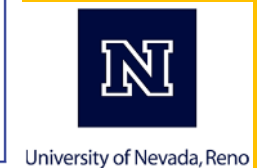

# CARLSBAD CAVERN NEW MEXICO USA

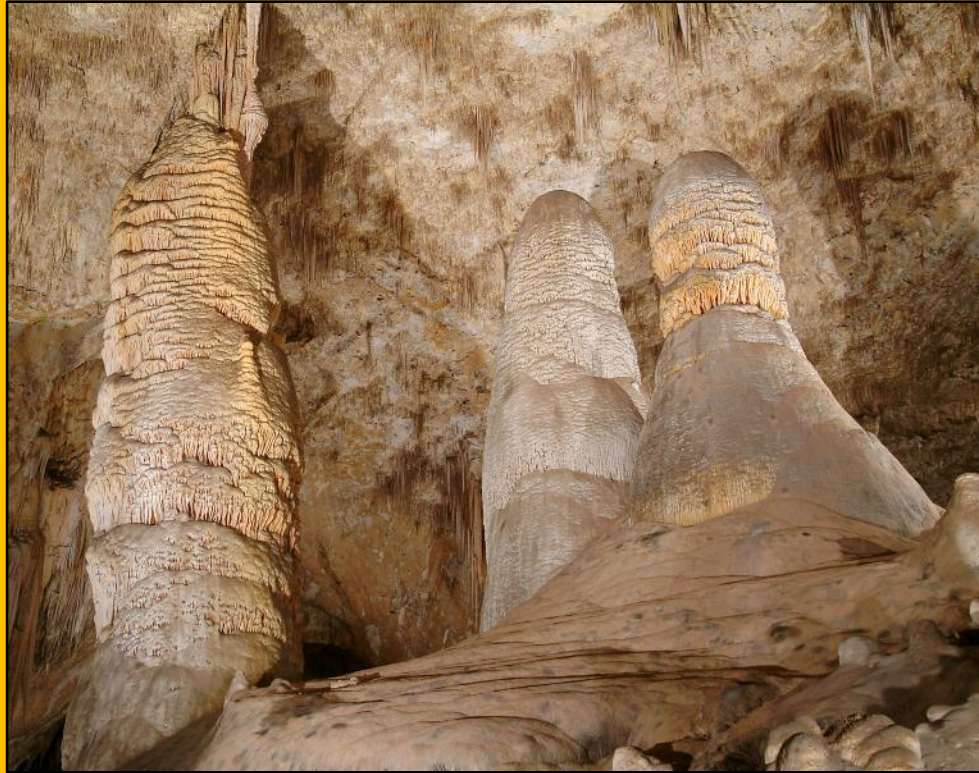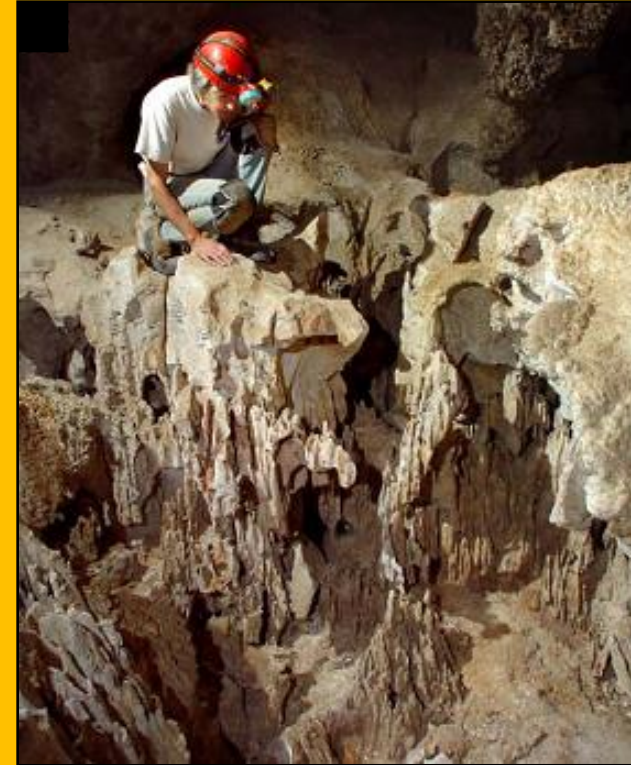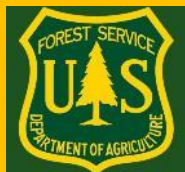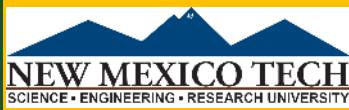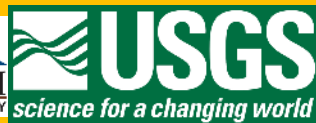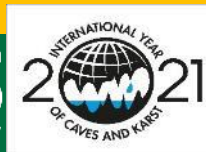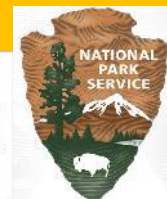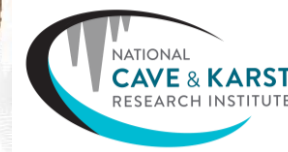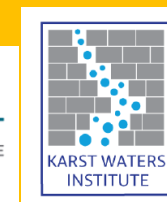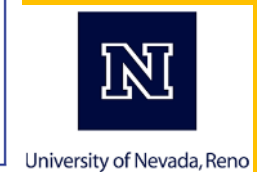

# CARLSBAD CAVERN NEW MEXICO USA

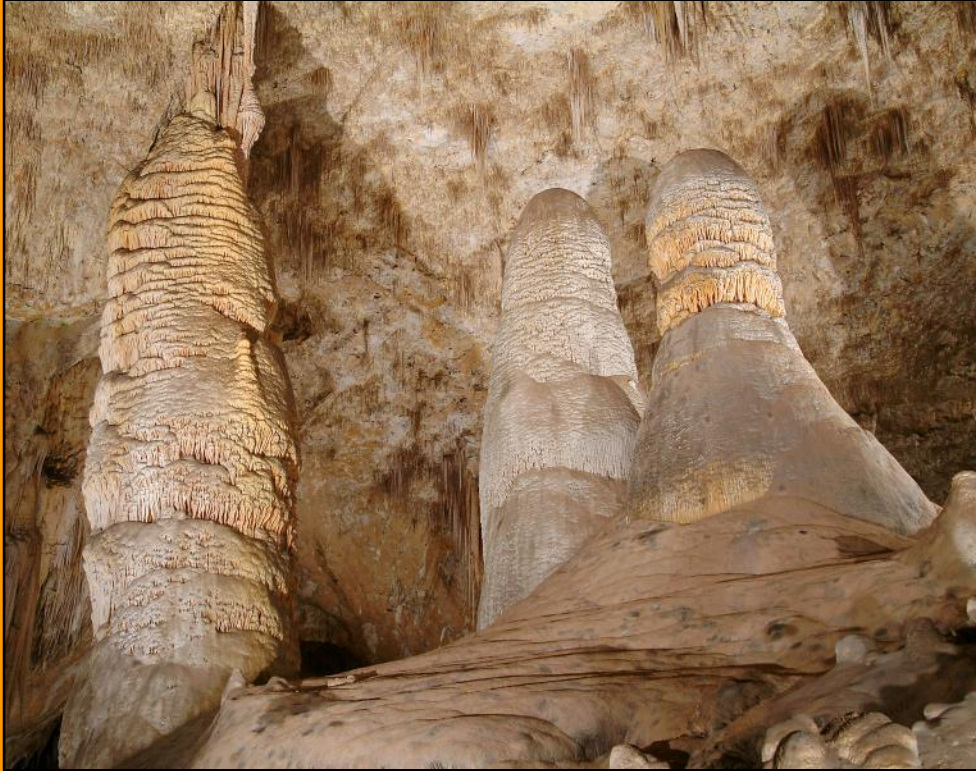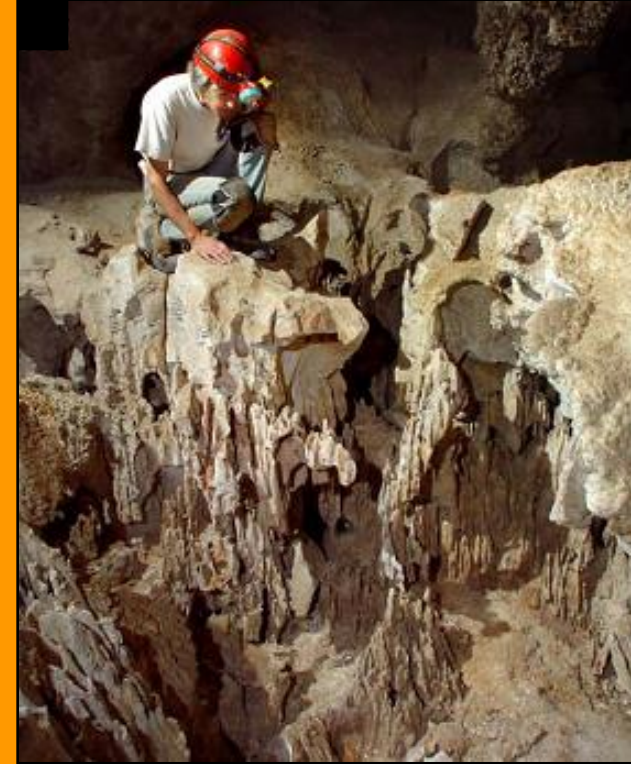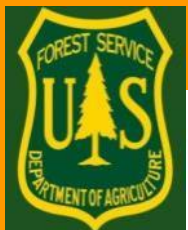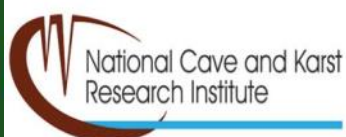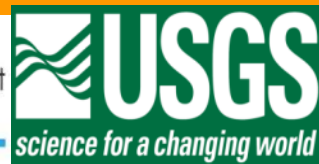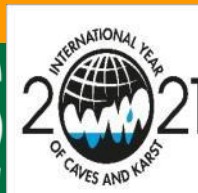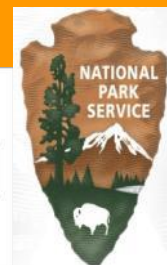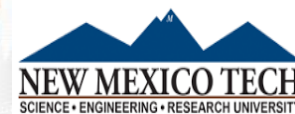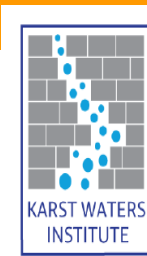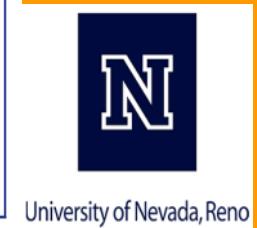

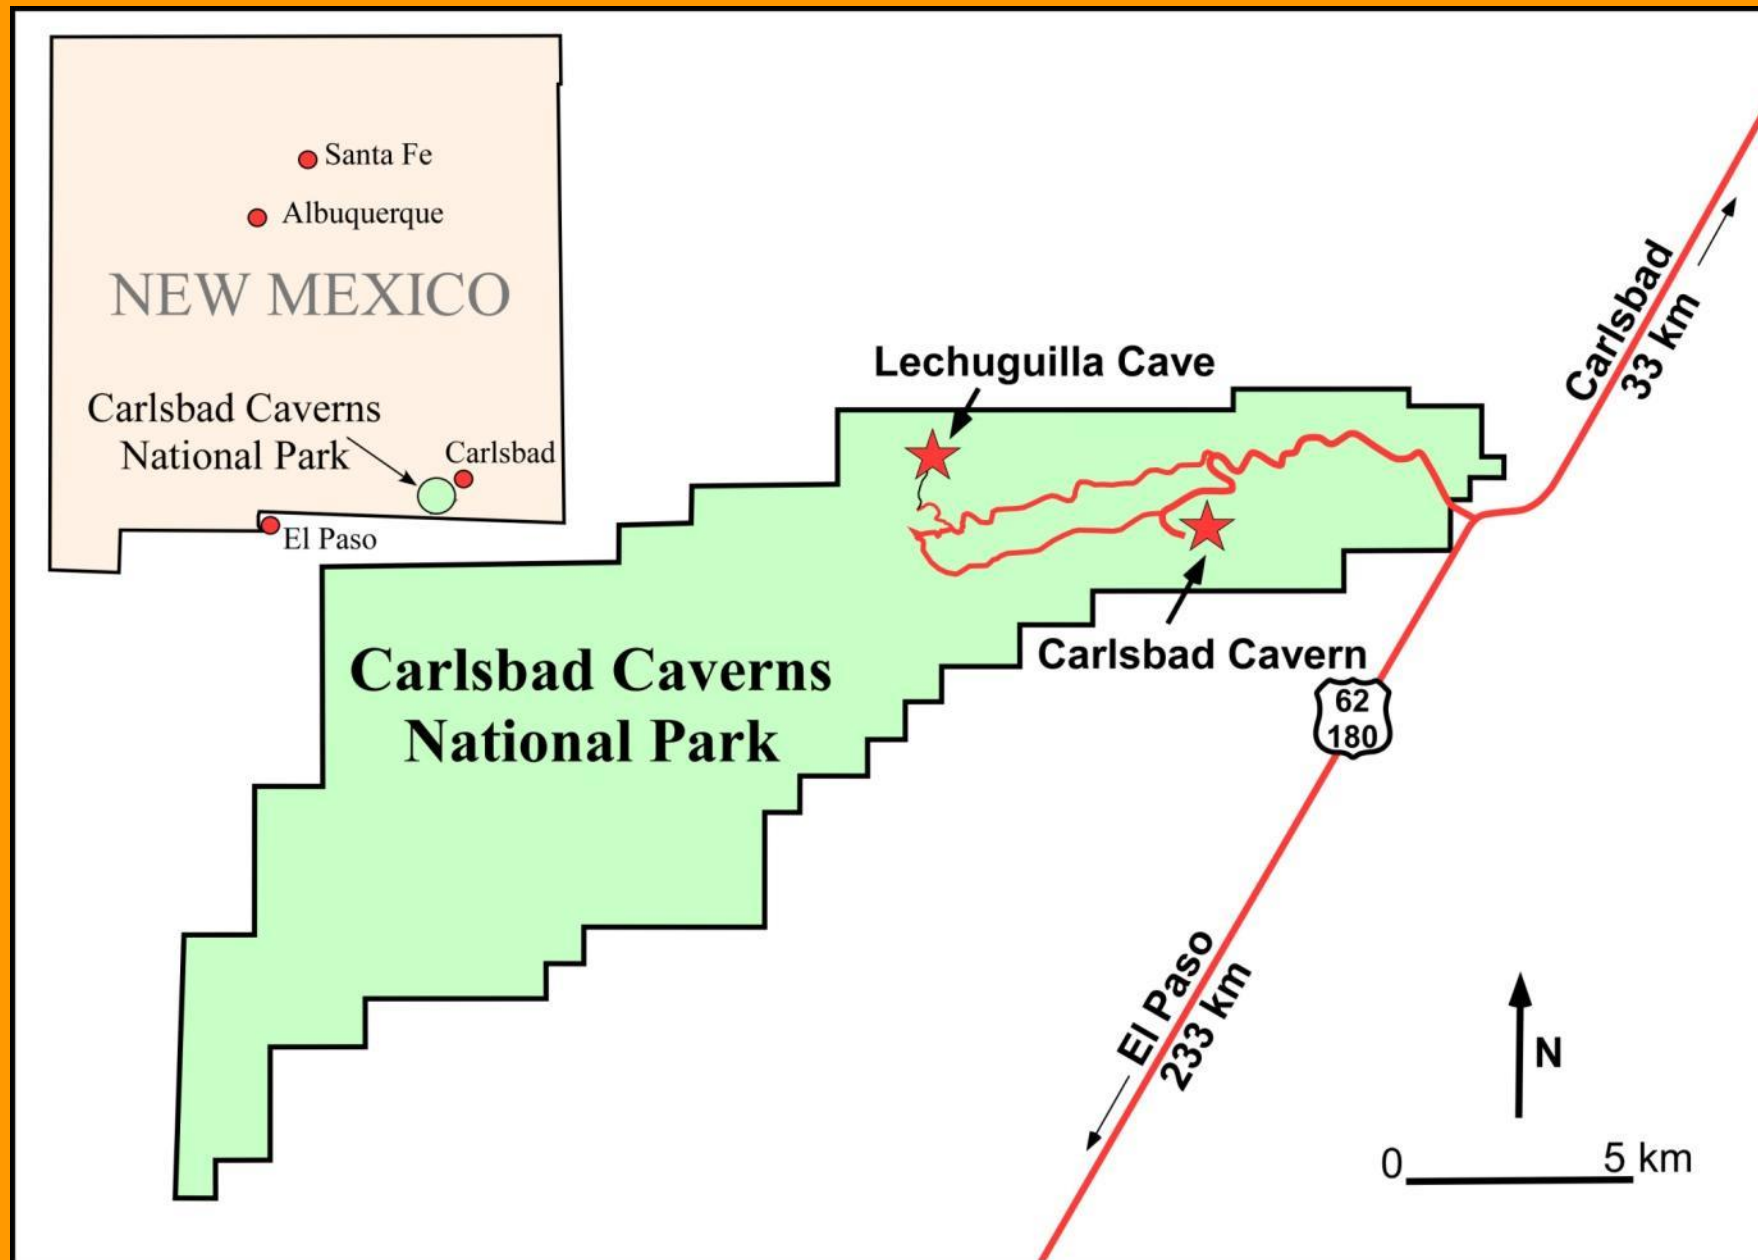

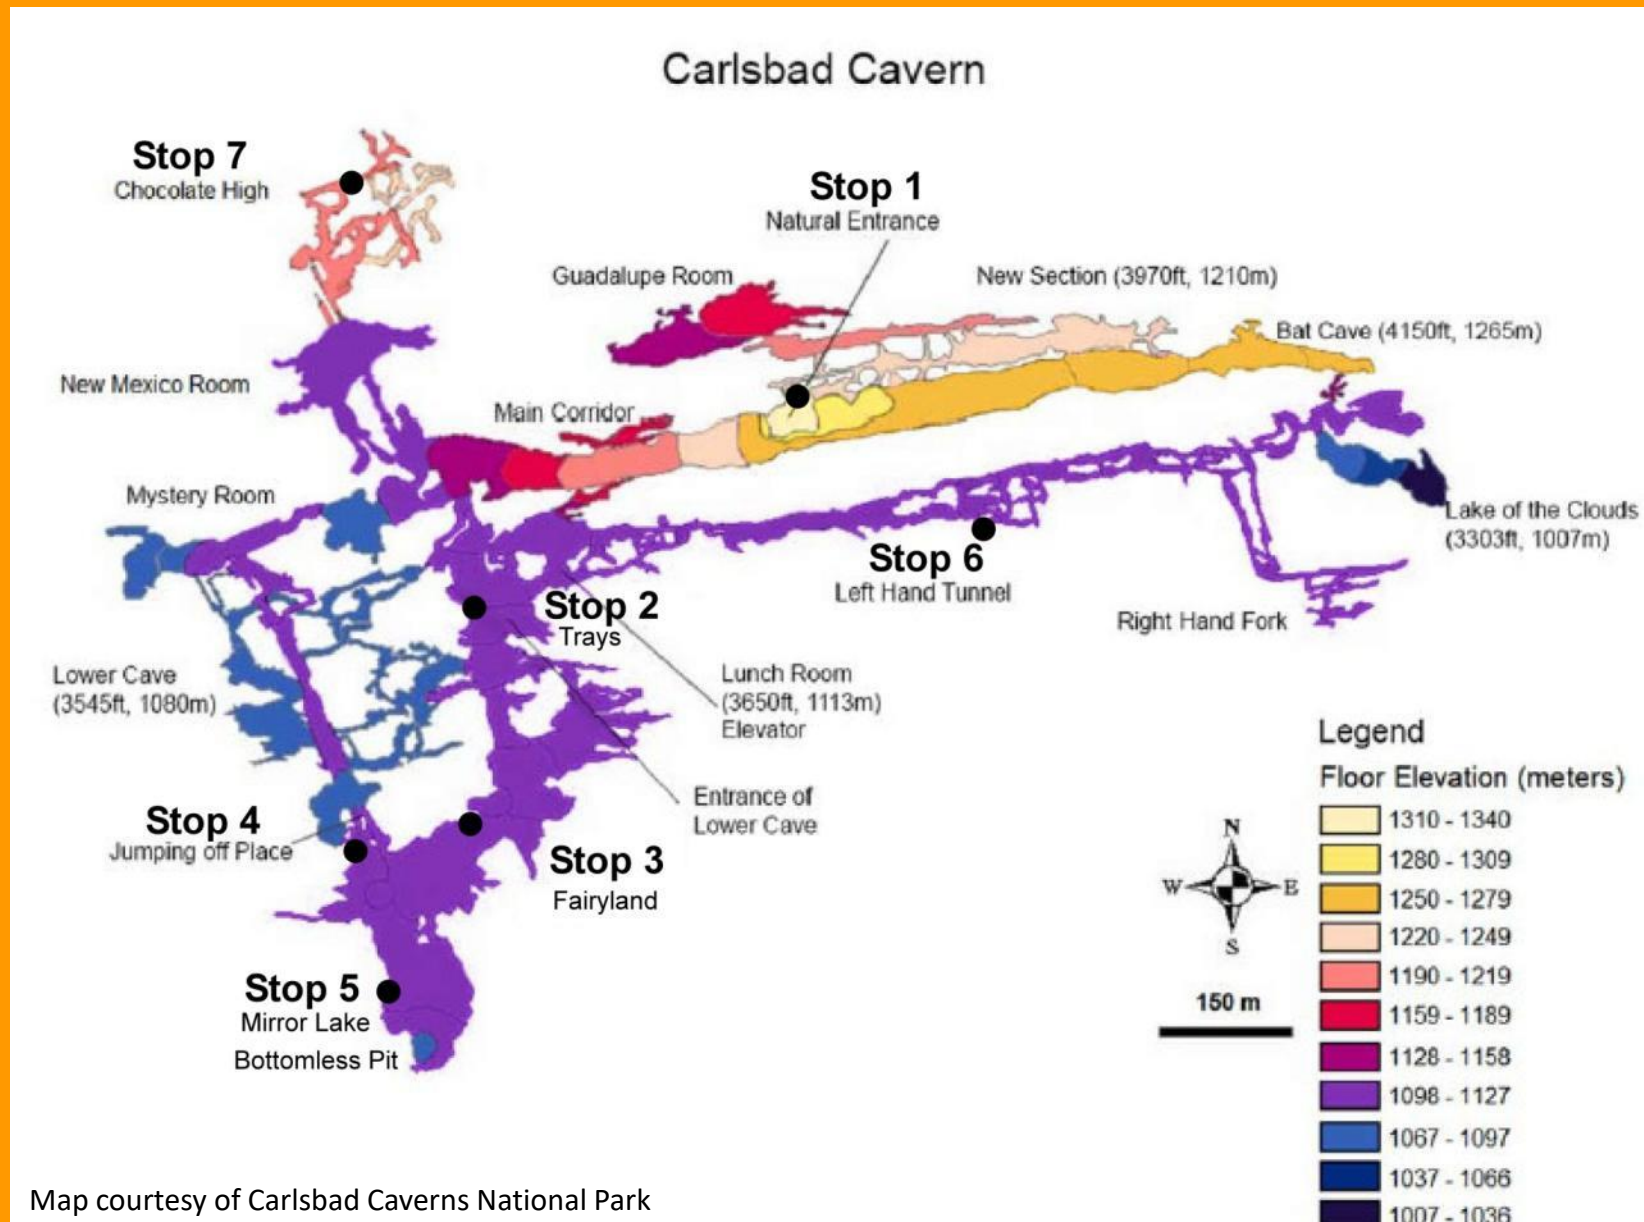

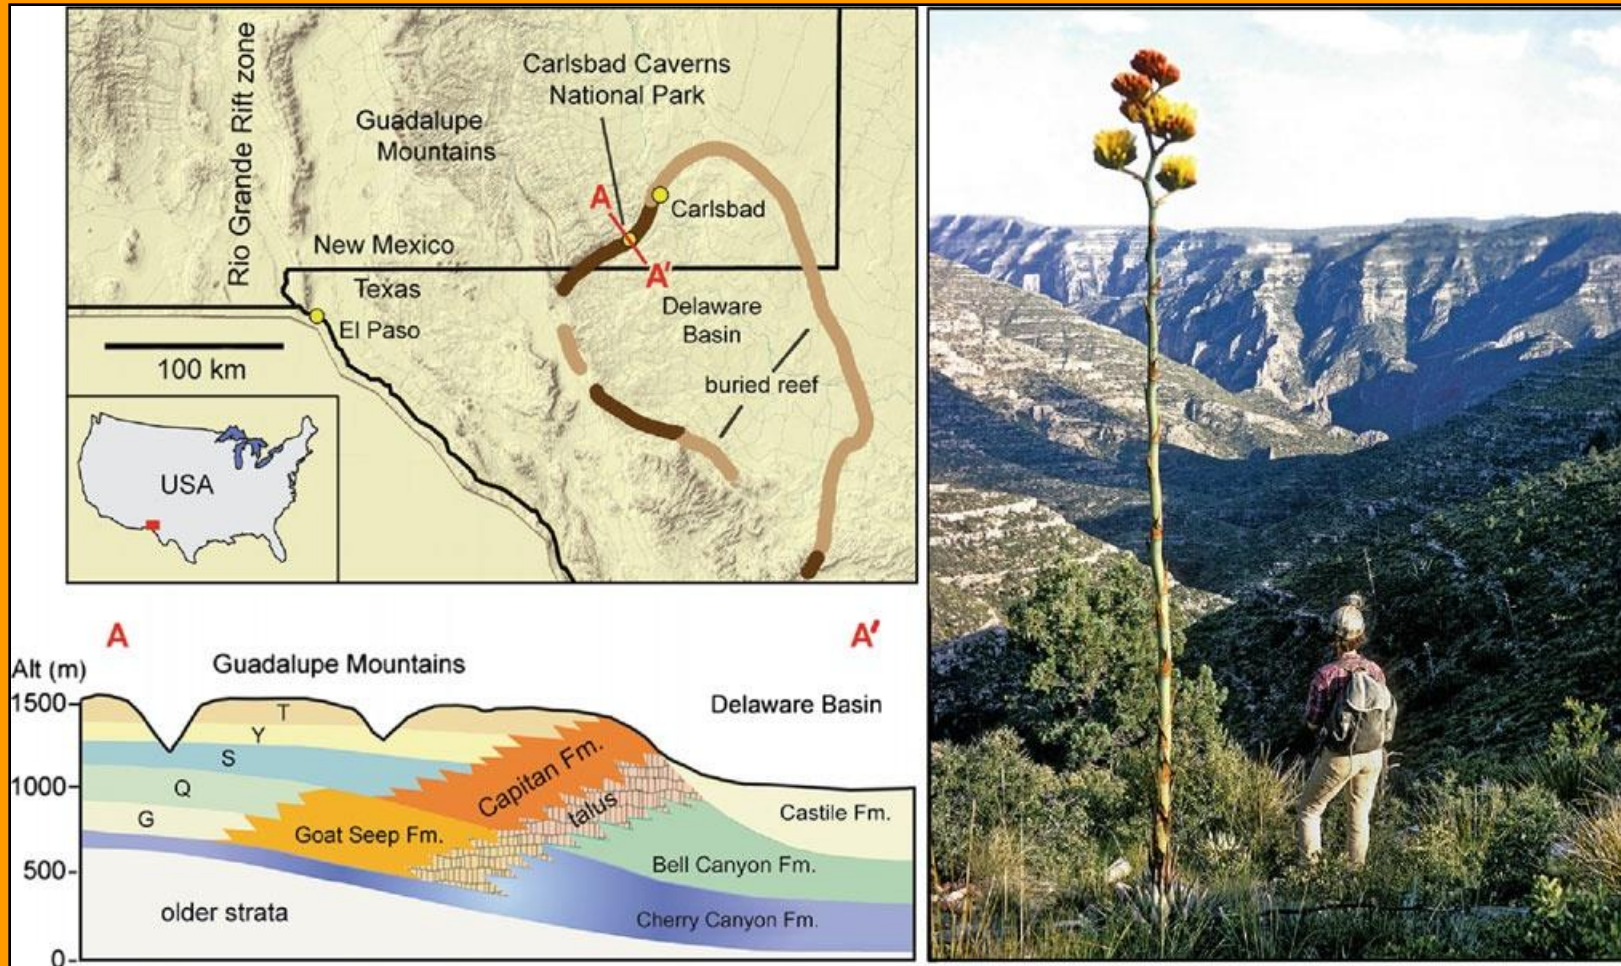

Location of the Capitan reef and Delaware Basin, with Rio Grande Rift to the west (modified from Harris et al. 1997). Backreef strata: G Grayburg, Q Queen, S Seven Rivers, Y Yates, T Tansill. Digital elevation map by Paul Burger. Cross section from Palmer and Palmer (2012). The photograph shows the gently dipping limestones and typical dissected plateau topography of the Guadalupe (Photograph and graphics by A. N. Palmer)

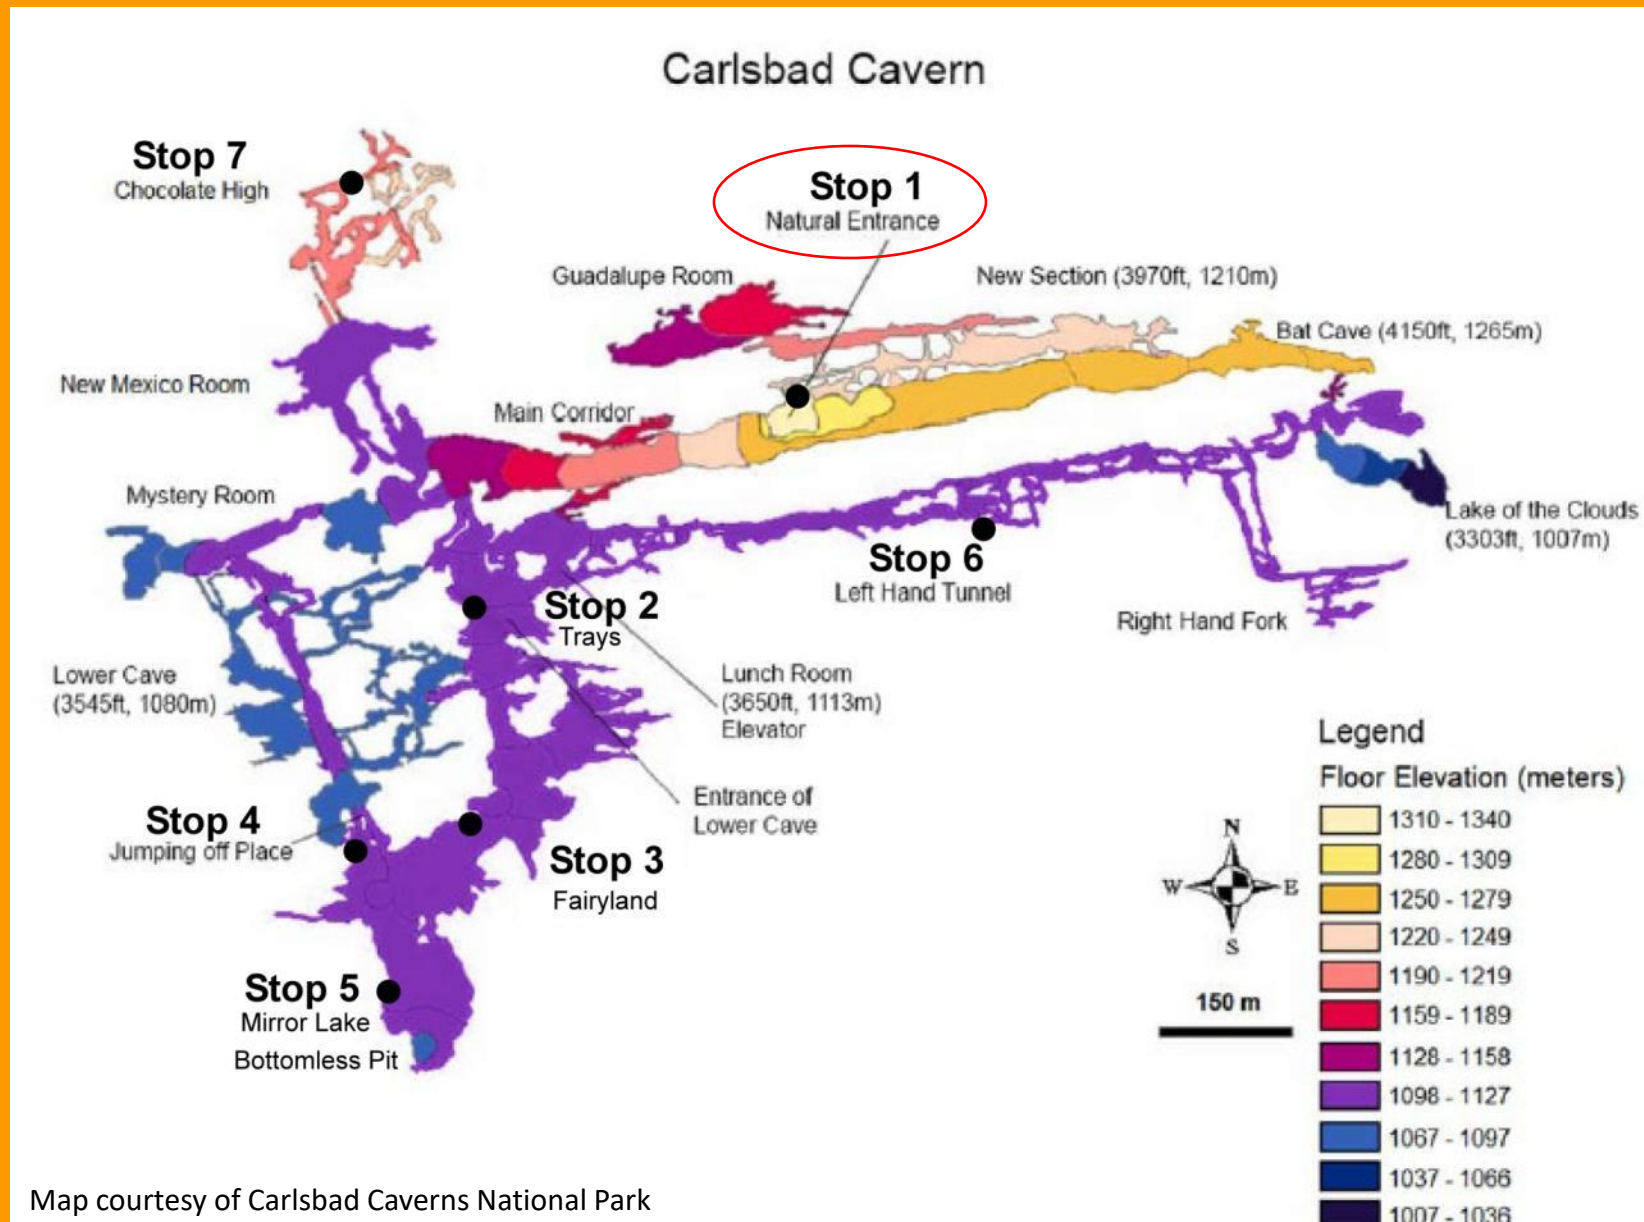

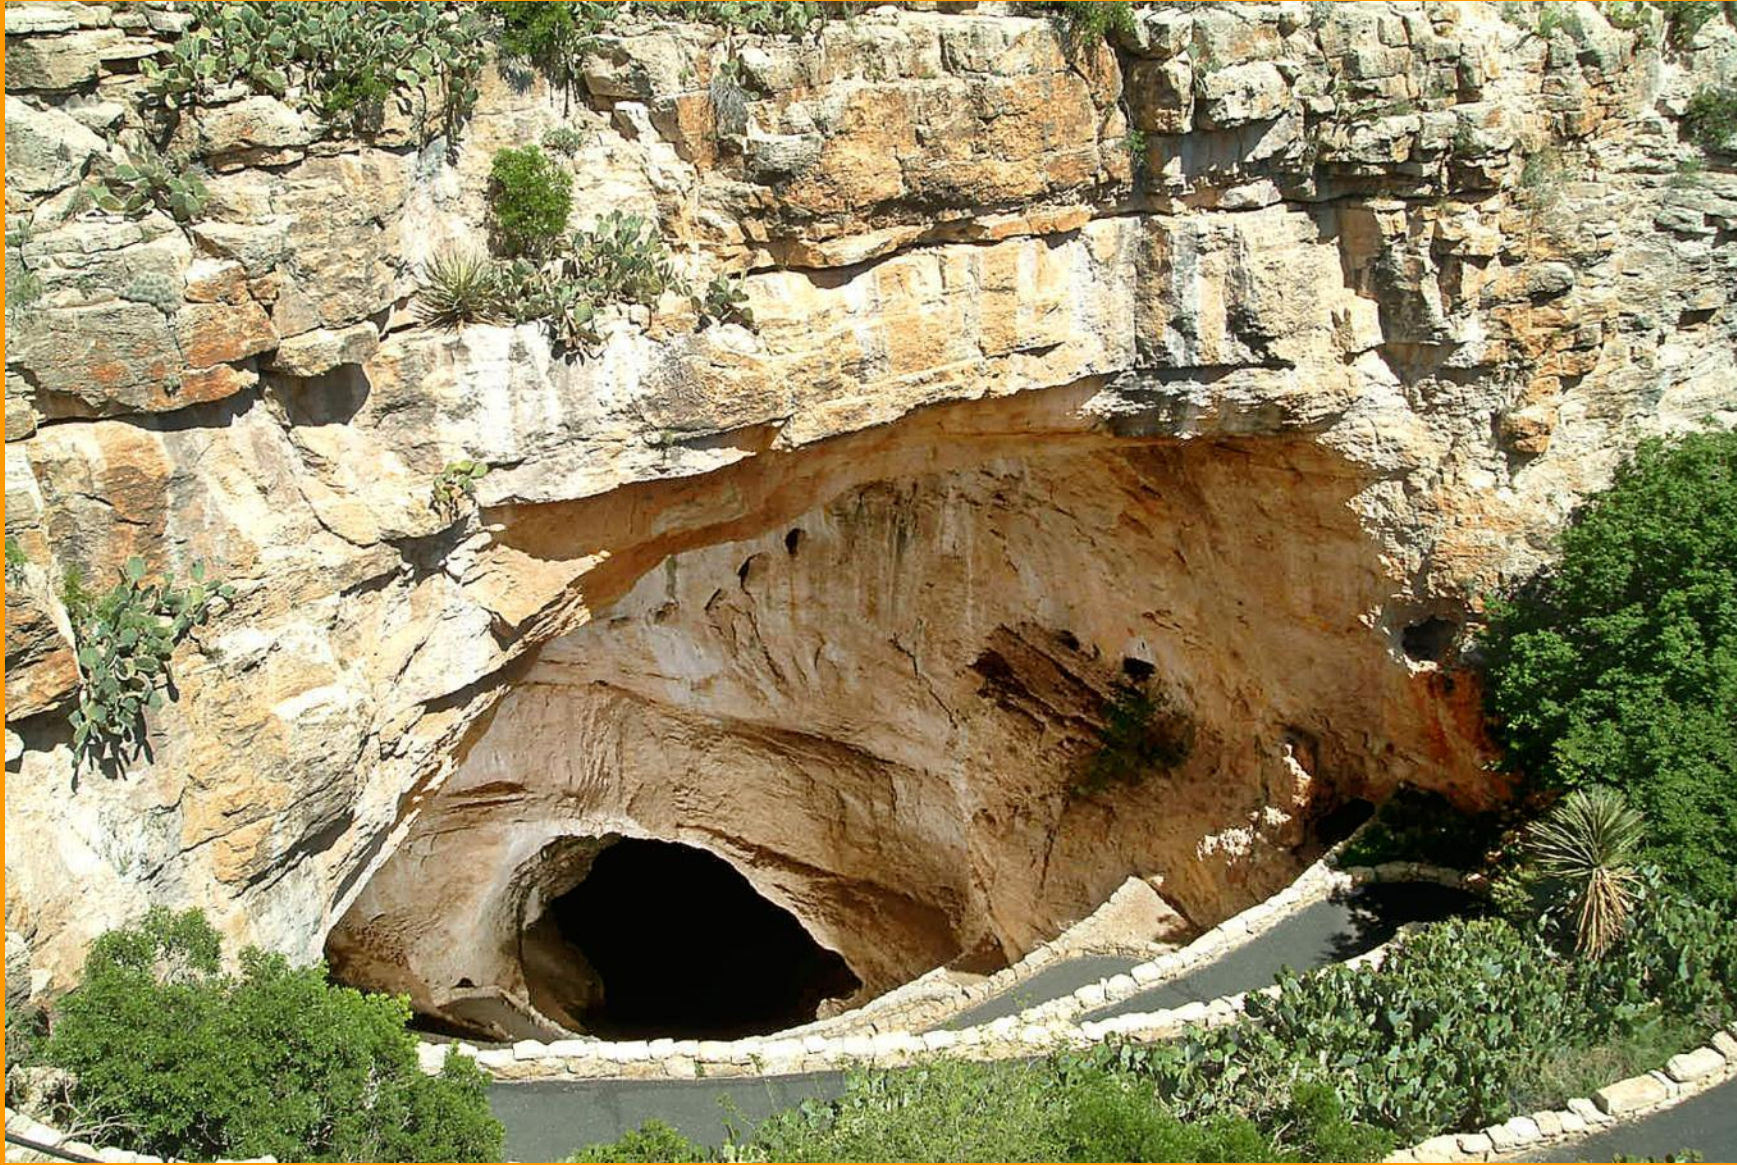

**Stop 1. Entrance to Carlsbad Cavern**

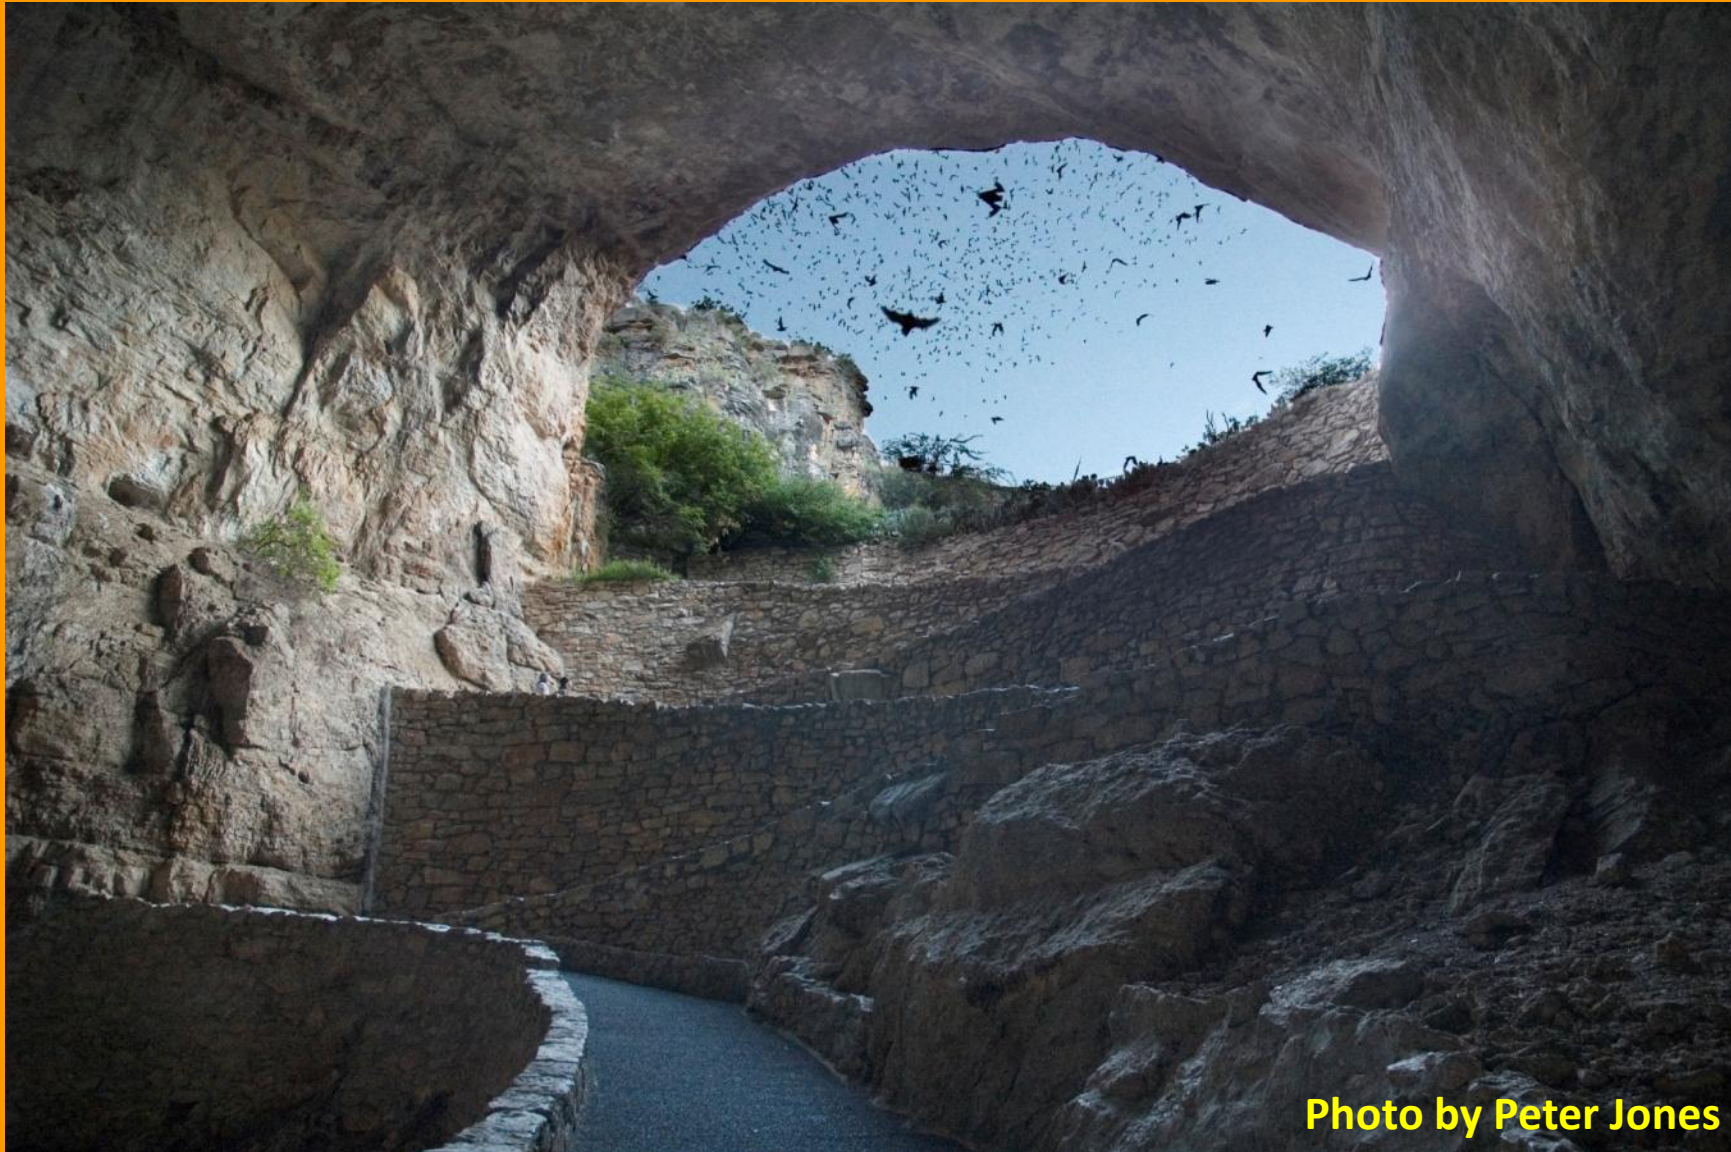

Photo by Peter Jones

Entrance during bat flight.

*Hypogenic Caves of the Great Basin: Chapter 3, Carlsbad Cavern*

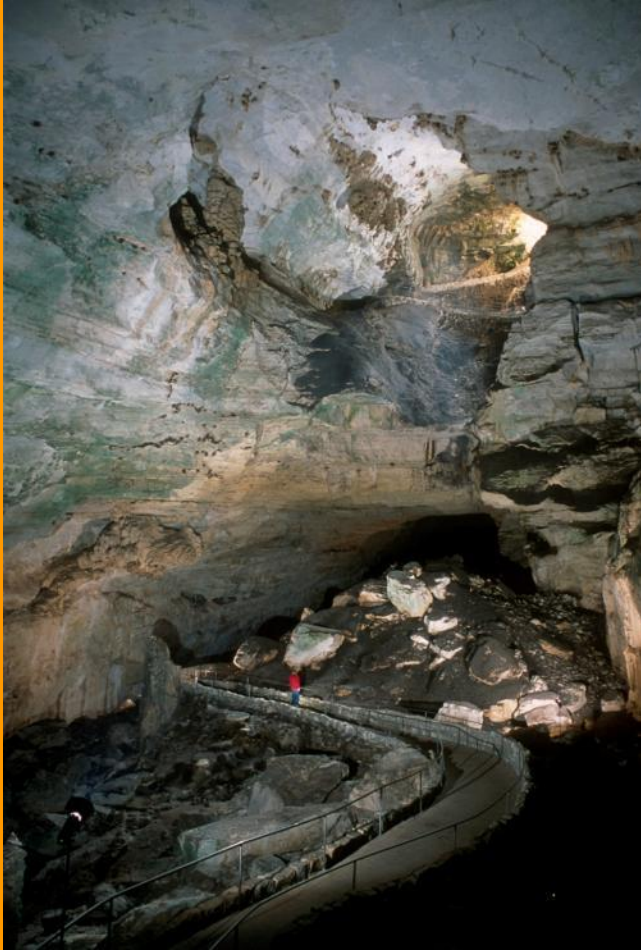

**Trail below entrance**

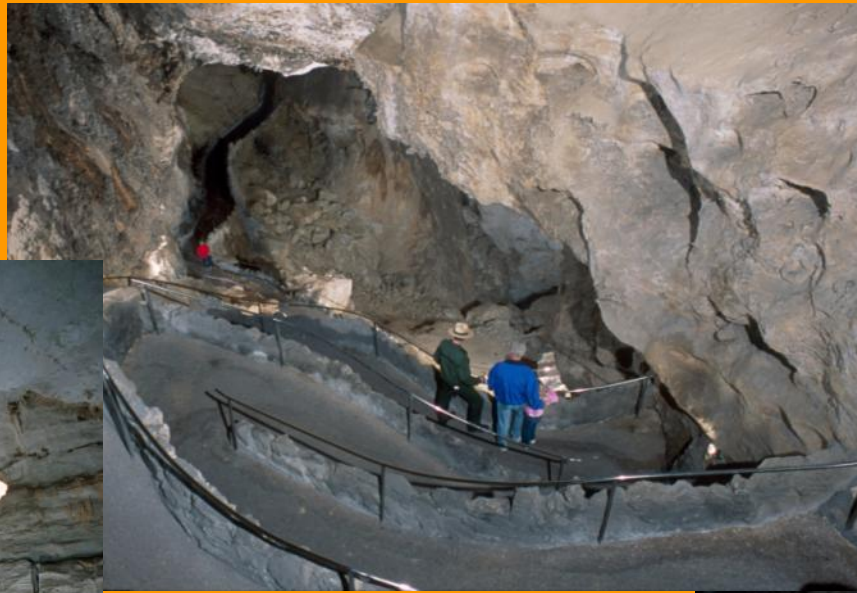

**Switchbacks**

**Views of the tourist trail  
from the entrance to the  
Big Room.**

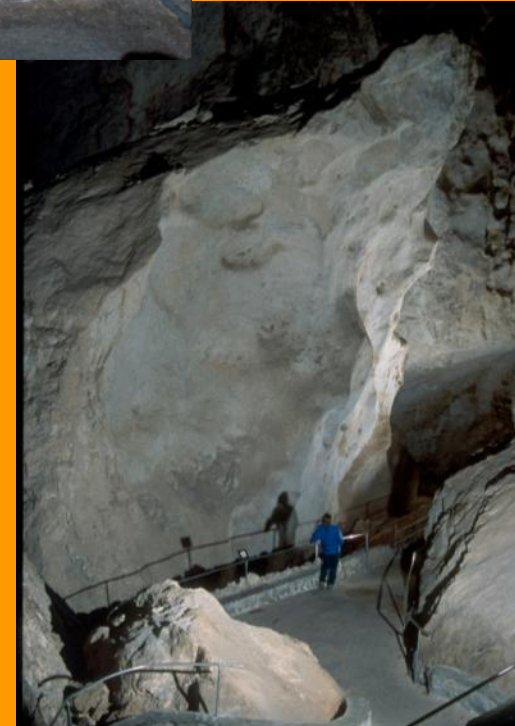

**Iceberg Rock**

**Photos by Peter Jones**

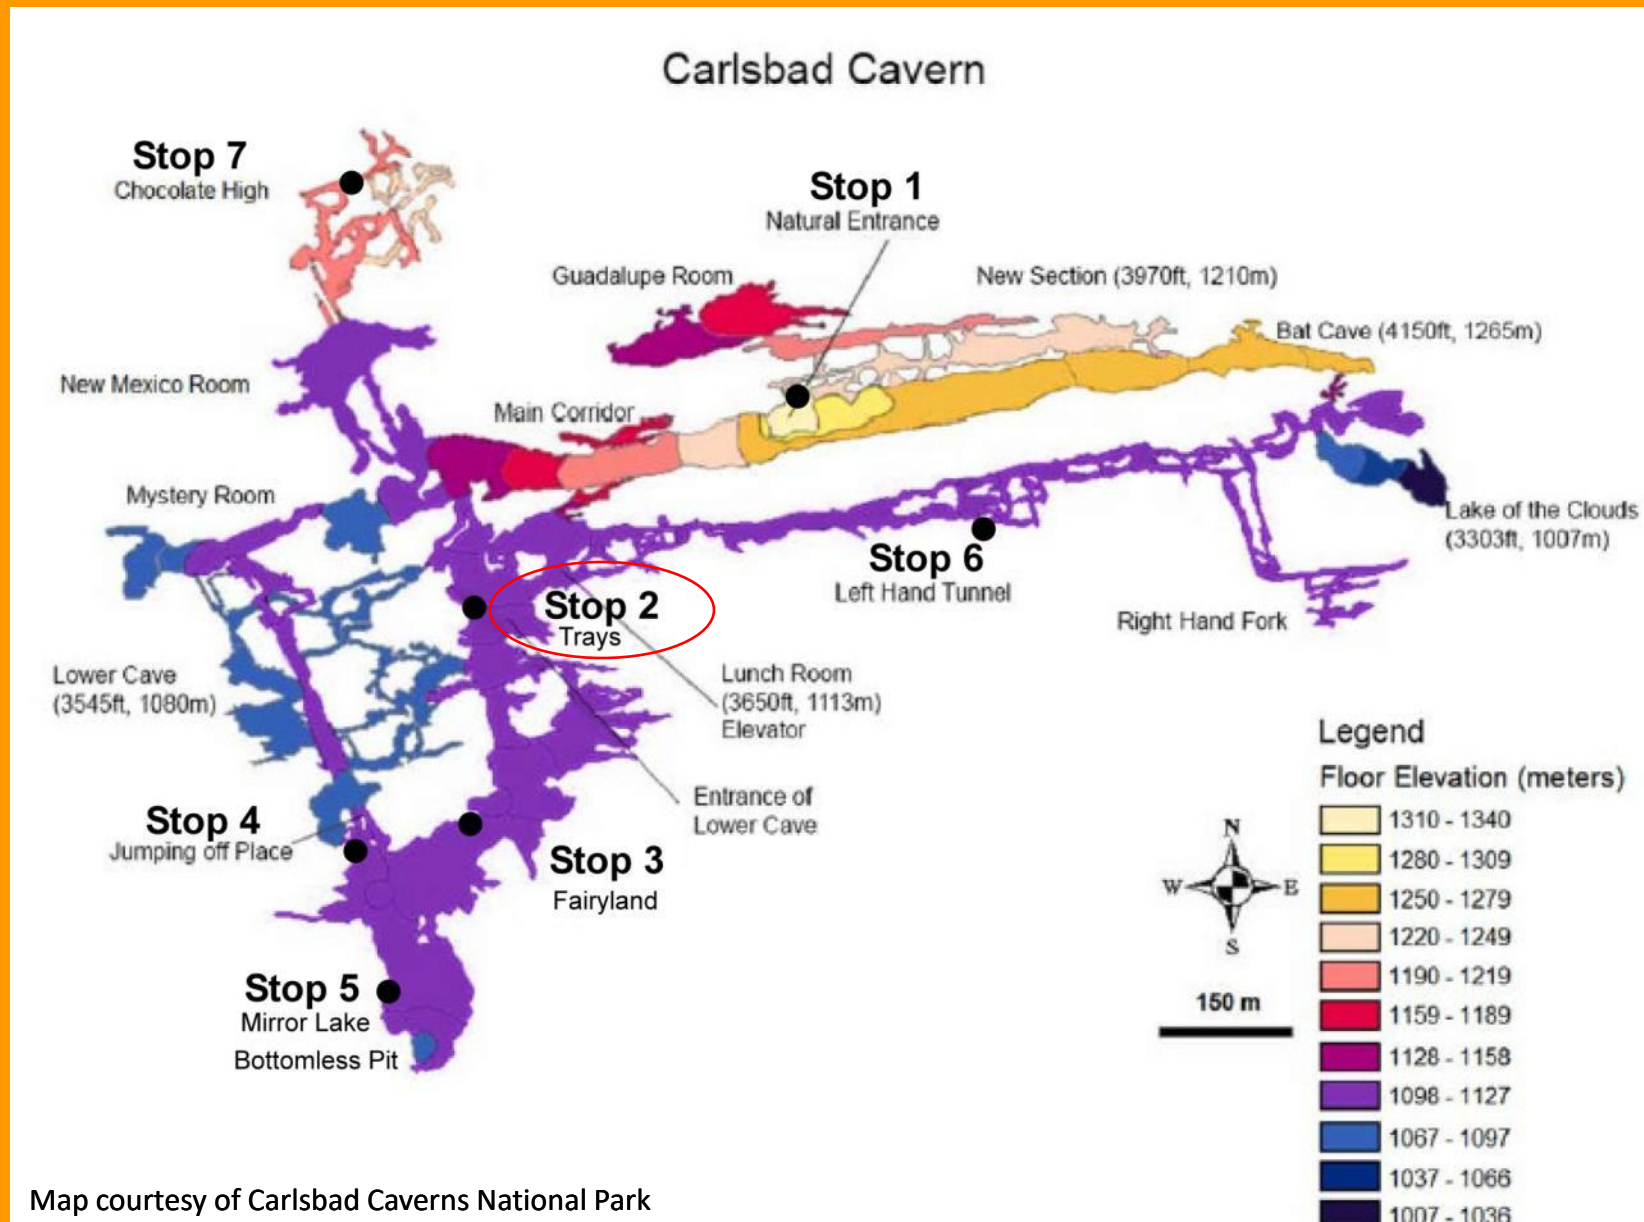

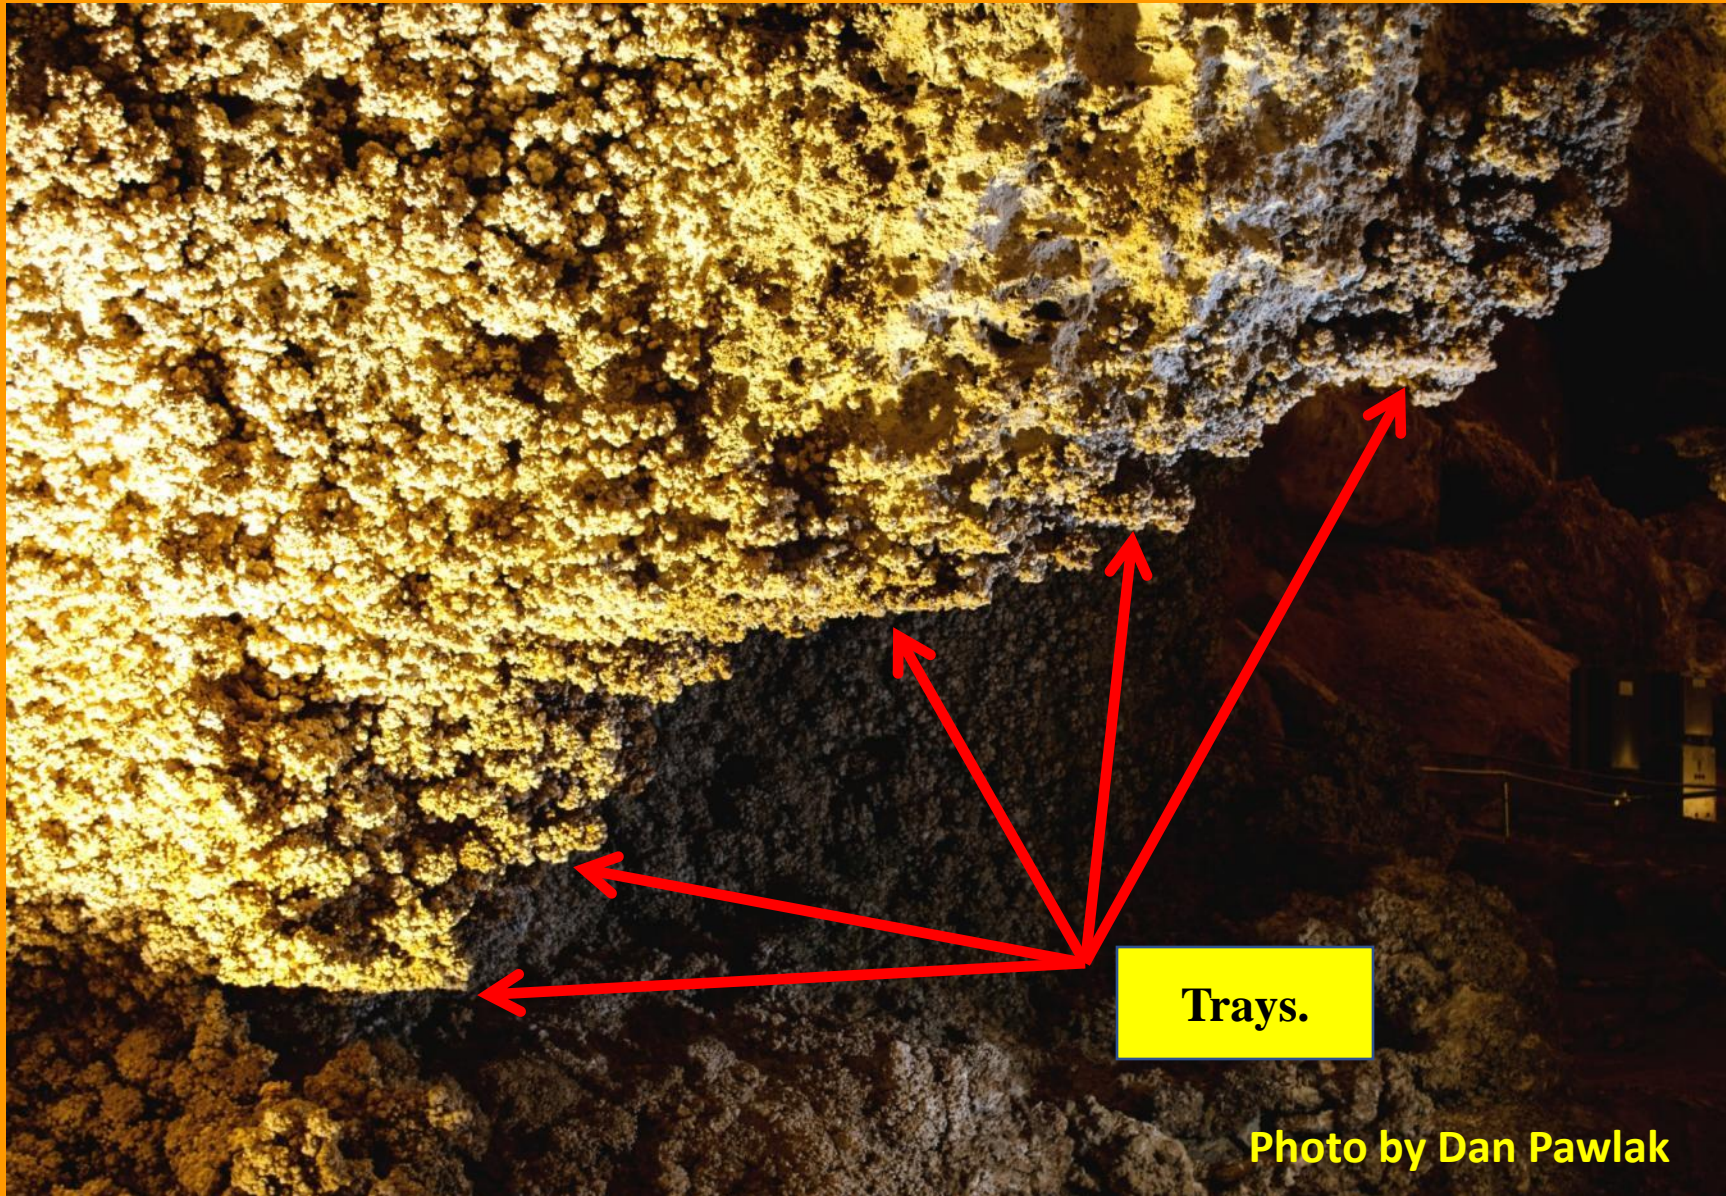

Photo by Dan Pawlak

**Stop 2. Trays on wall next to Tourist Trail, Big Room, Carlsbad Cavern**

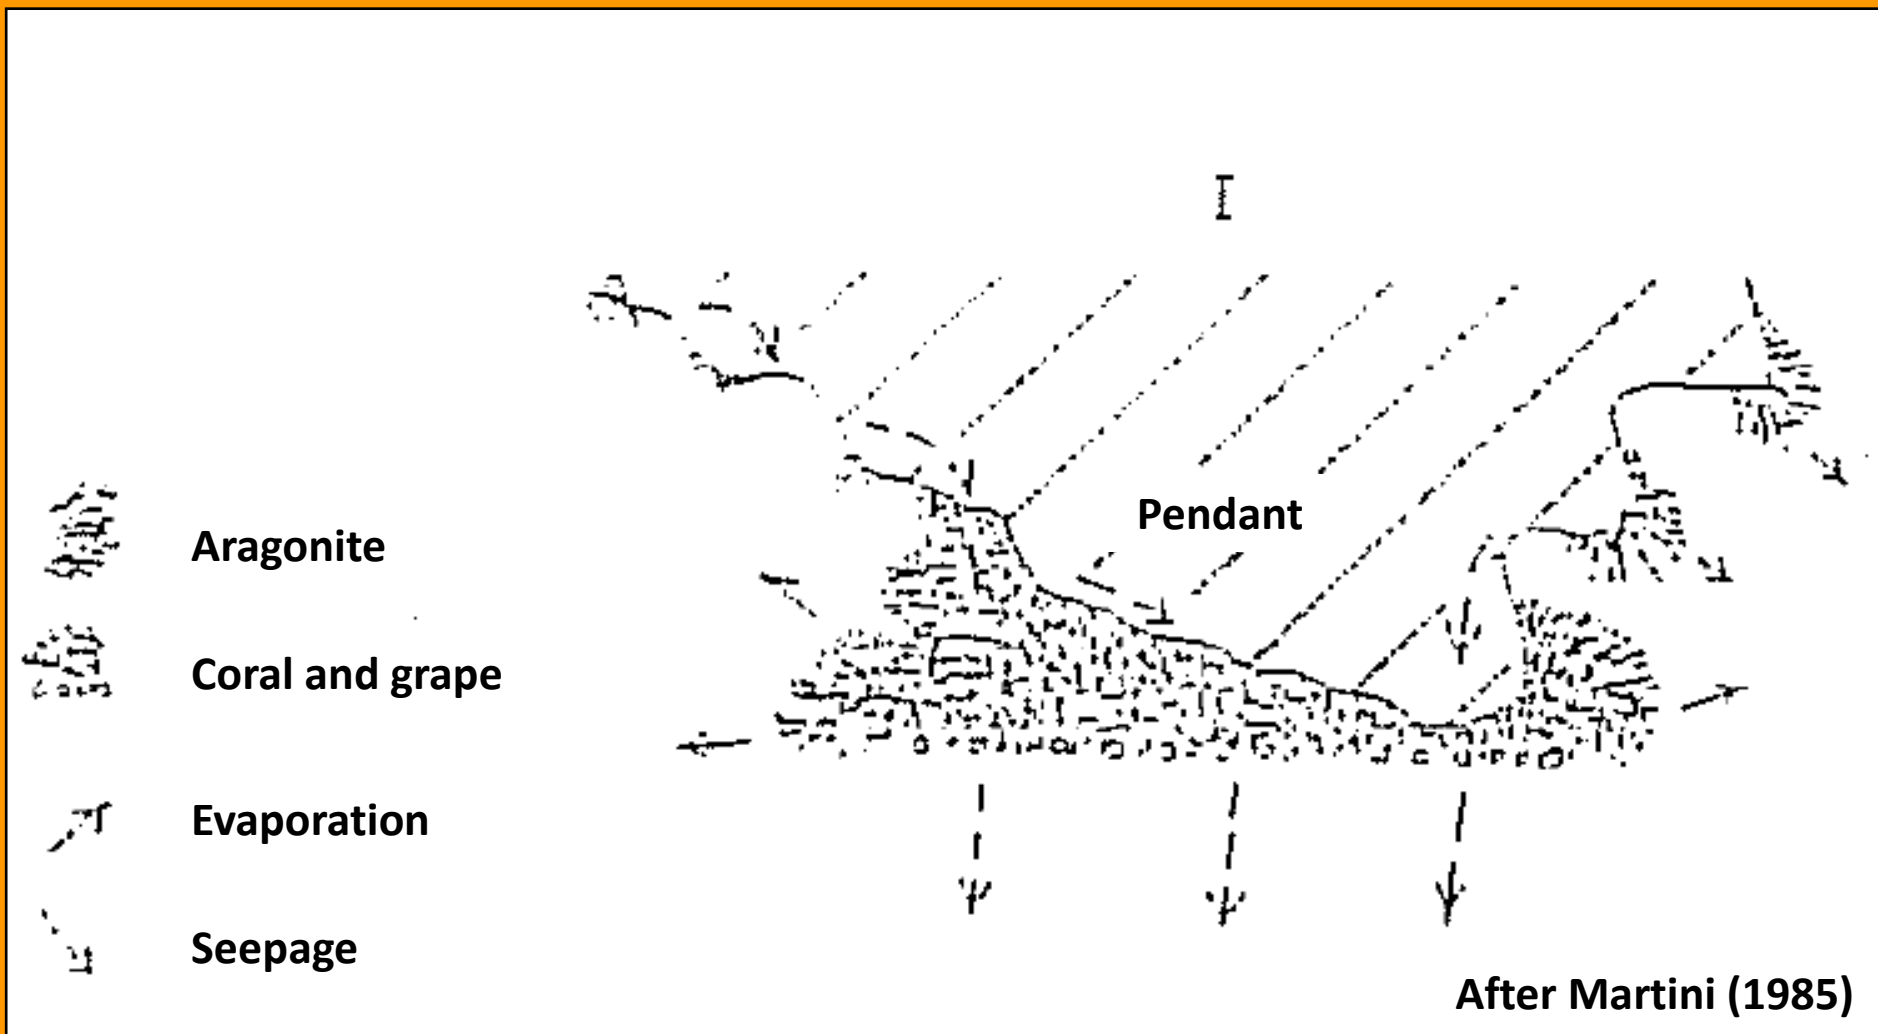

Jacques Martini's explanation for tray development

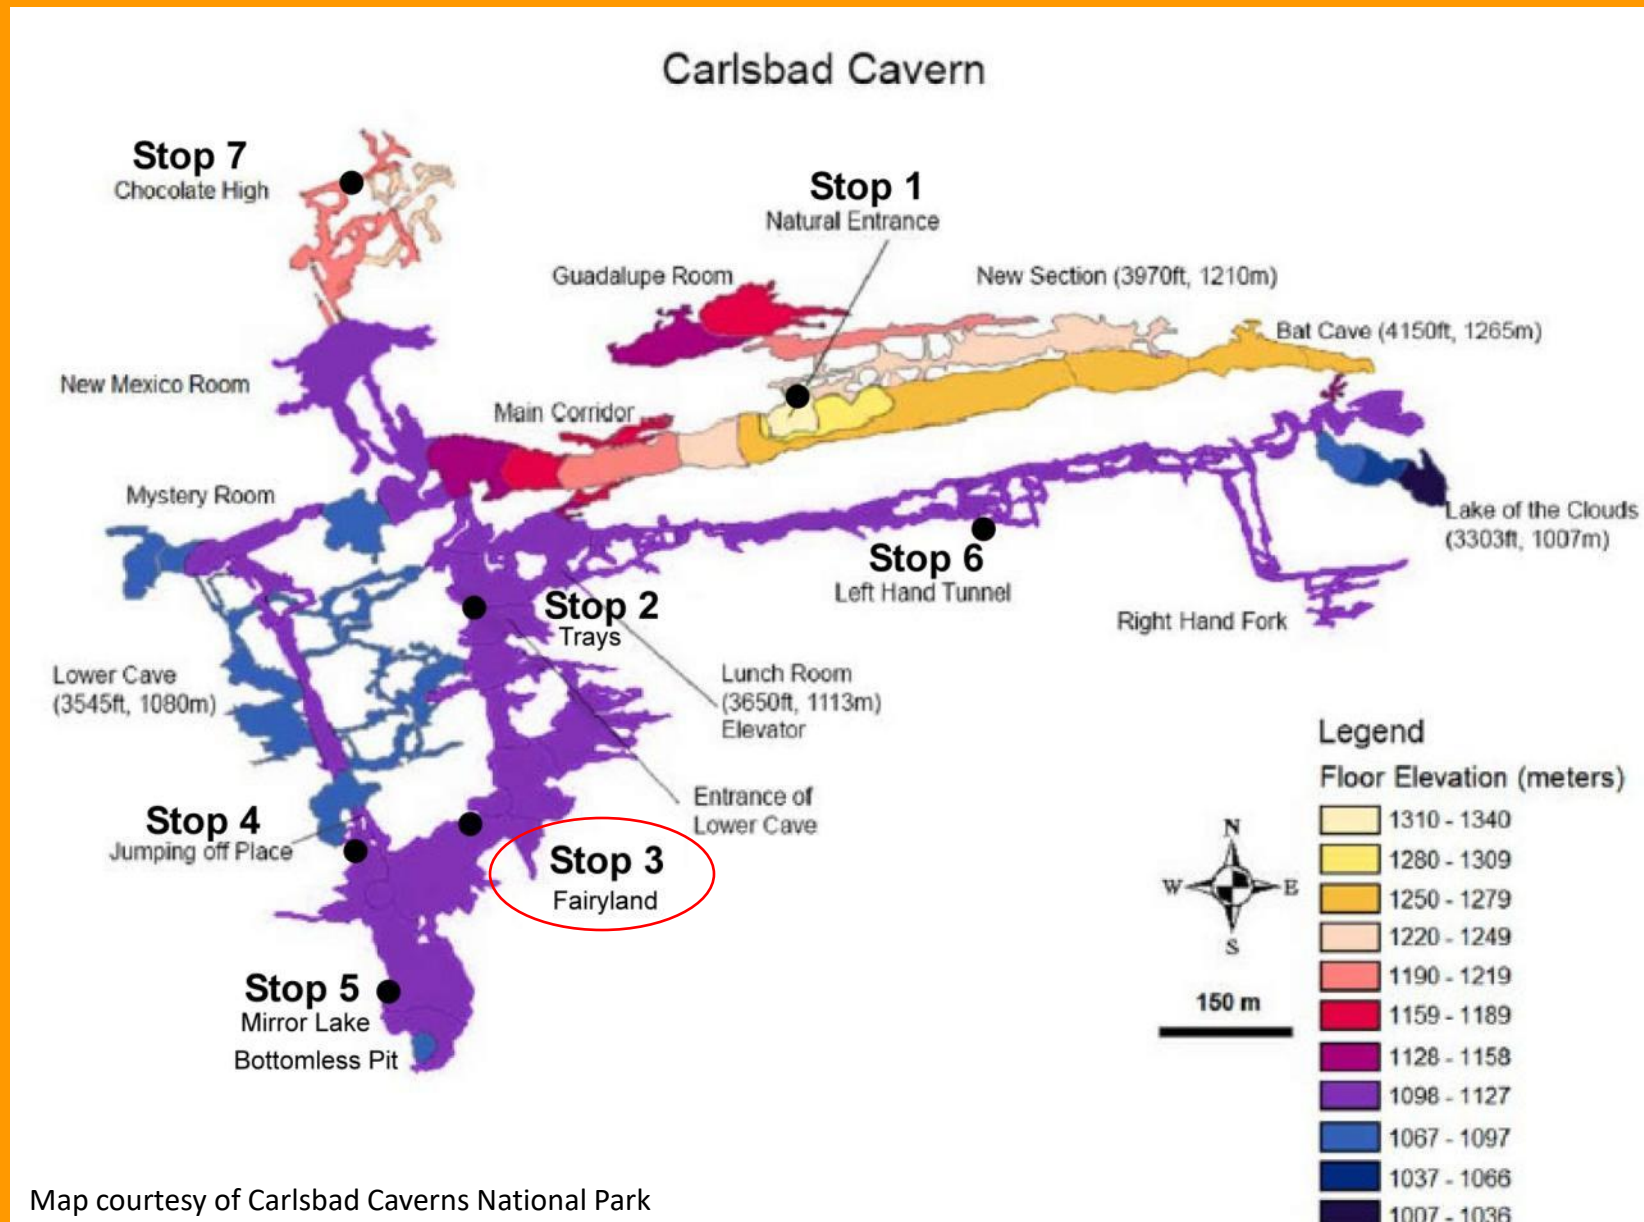

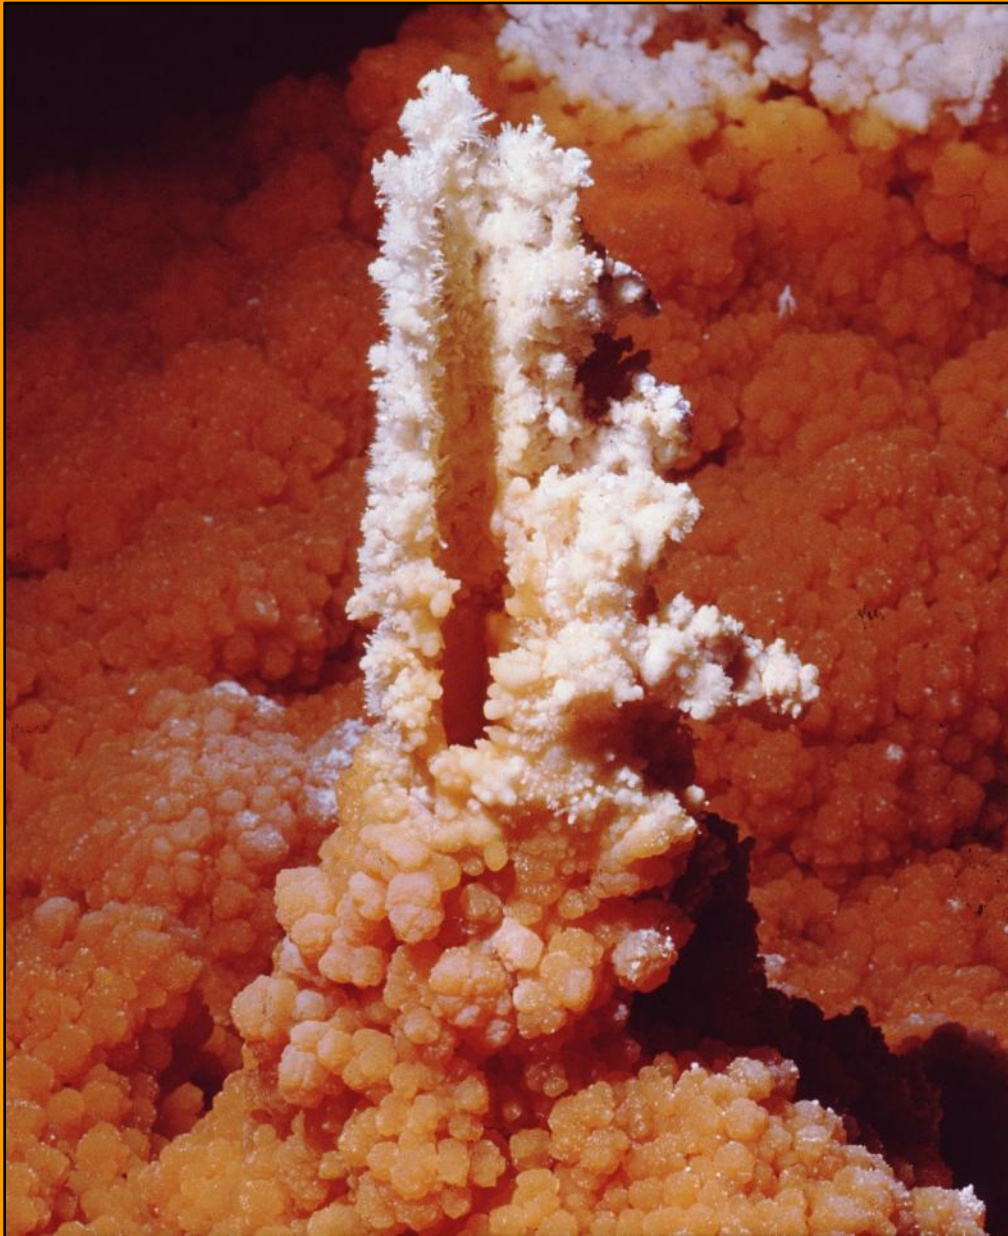

**Coral-encrusted drip tube. Photo by  
David Harris, Harris Photographic.**

**Photo by Dan Pawlak**

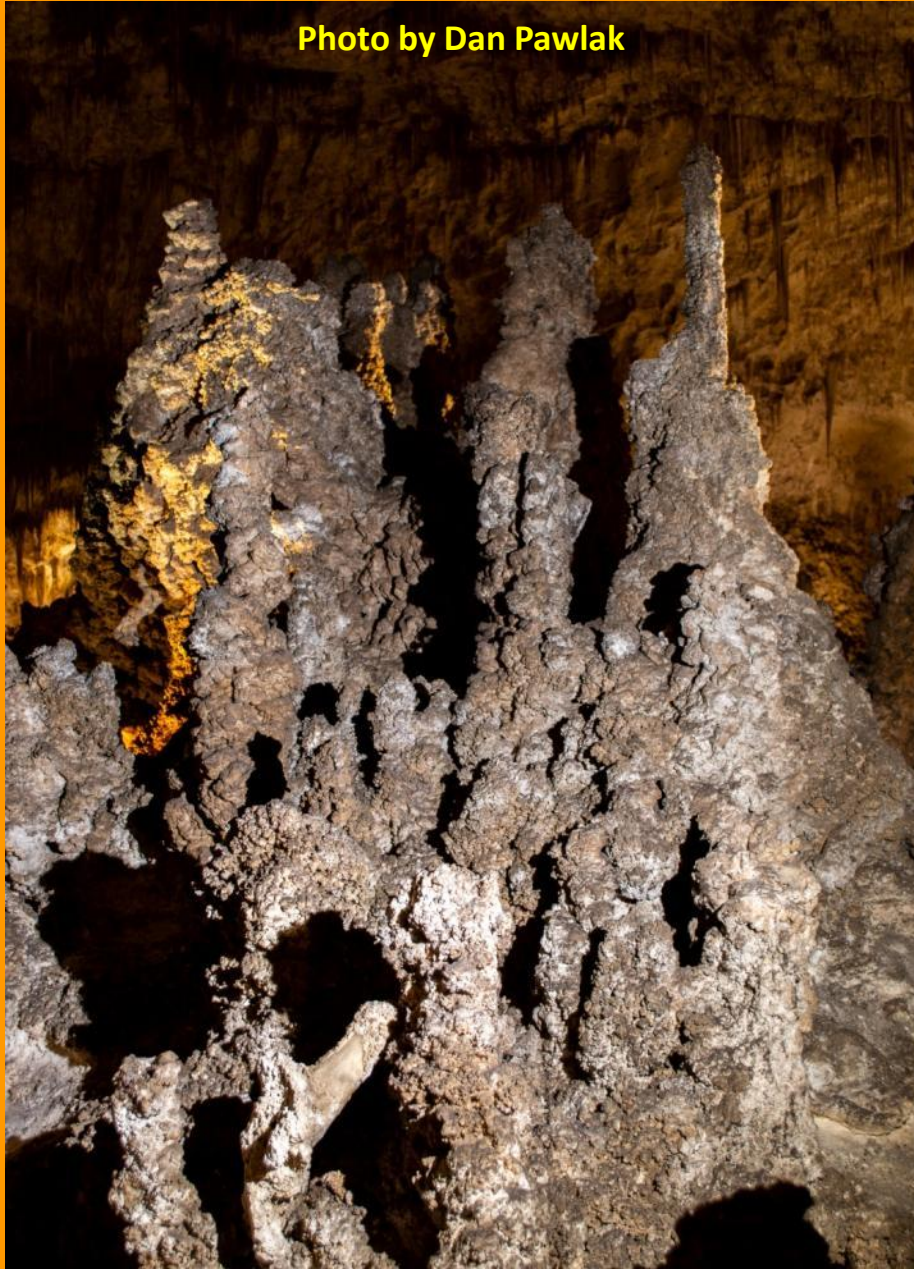

**Stop 3: Coral-encrusted drip tubes,  
Fairylane, along the trail through the  
Big Room of Carlsbad Cavern**

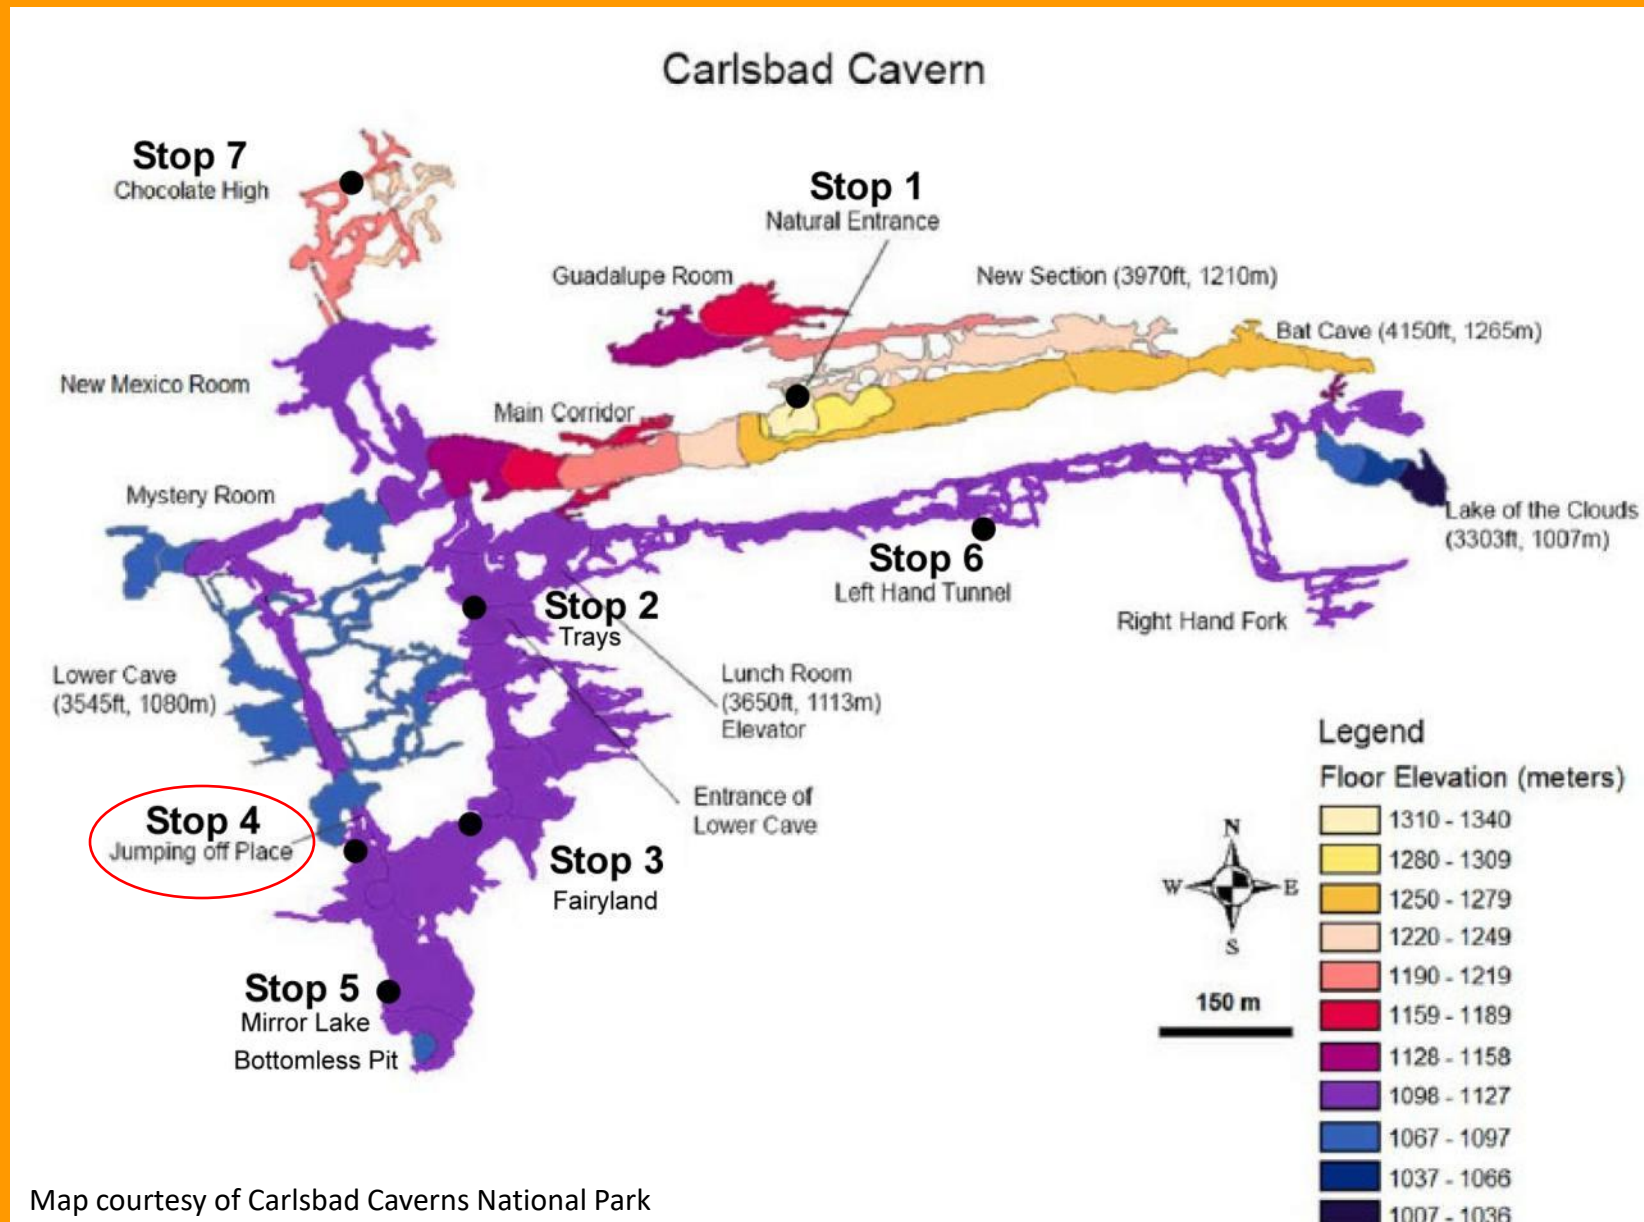

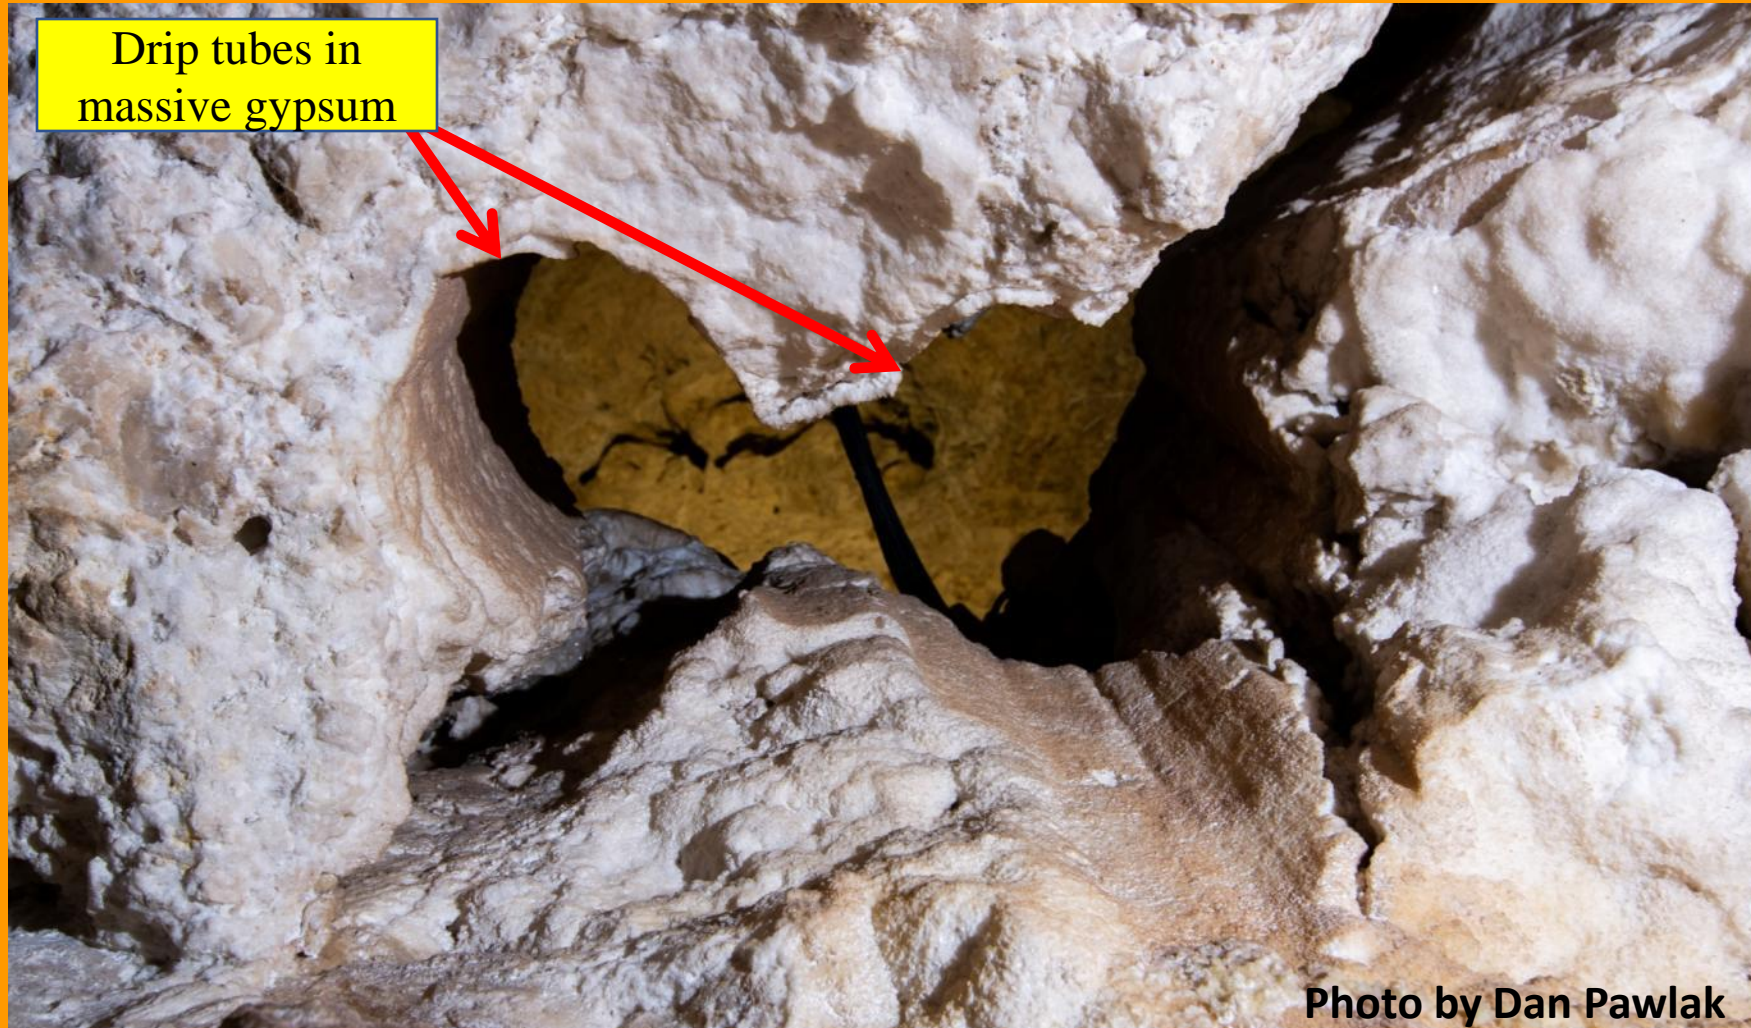

Photo by Dan Pawlak

**Stop 4. Drip holes through gypsum mass near the Jumping Off Place, viewed from the bottom looking up.**

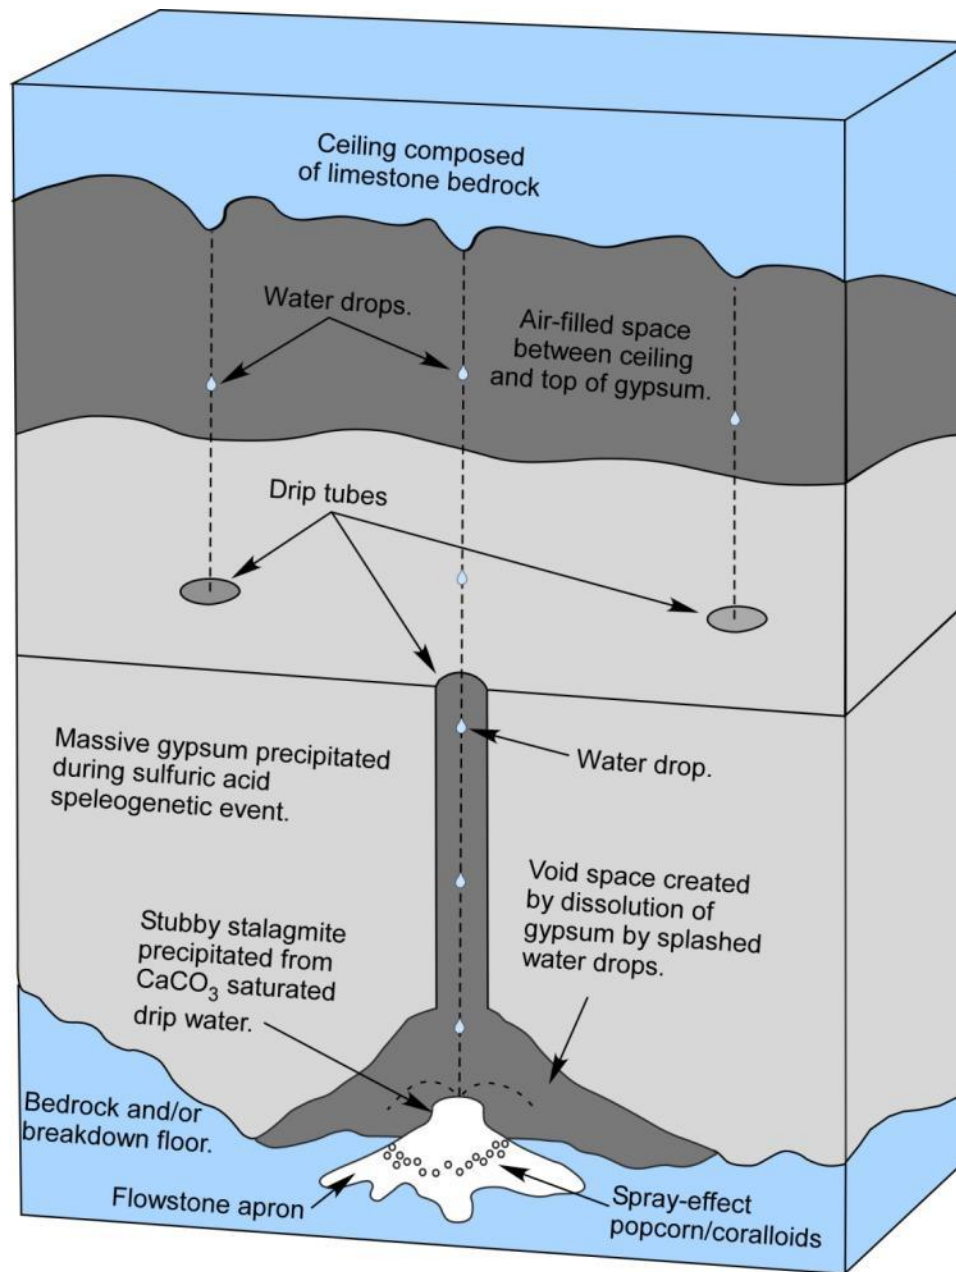

Diagram of a drip tube and associated features in a massive gypsum deposit. Tubes are commonly lined with common-ion effect calcite. Where tubes are coupled to the substrate, they may be preserved and develop into hollow corralloid-encrusted formations. Where the tubes are not coupled to the floor, they are destroyed when the gypsum mass dissolves.

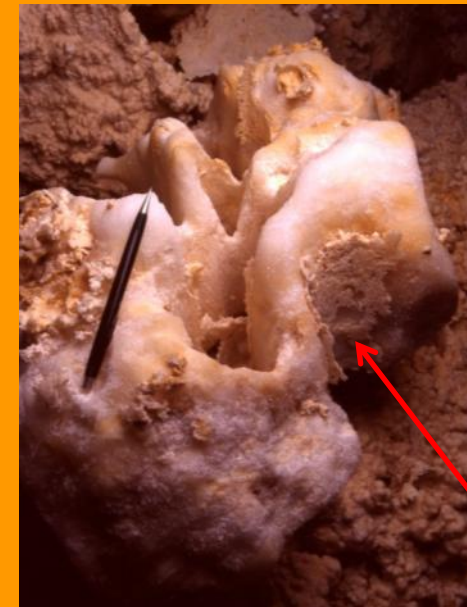

Gypsum remnant with remains of a calcite drip tube. Photo by David Harris, Harris Photographic.

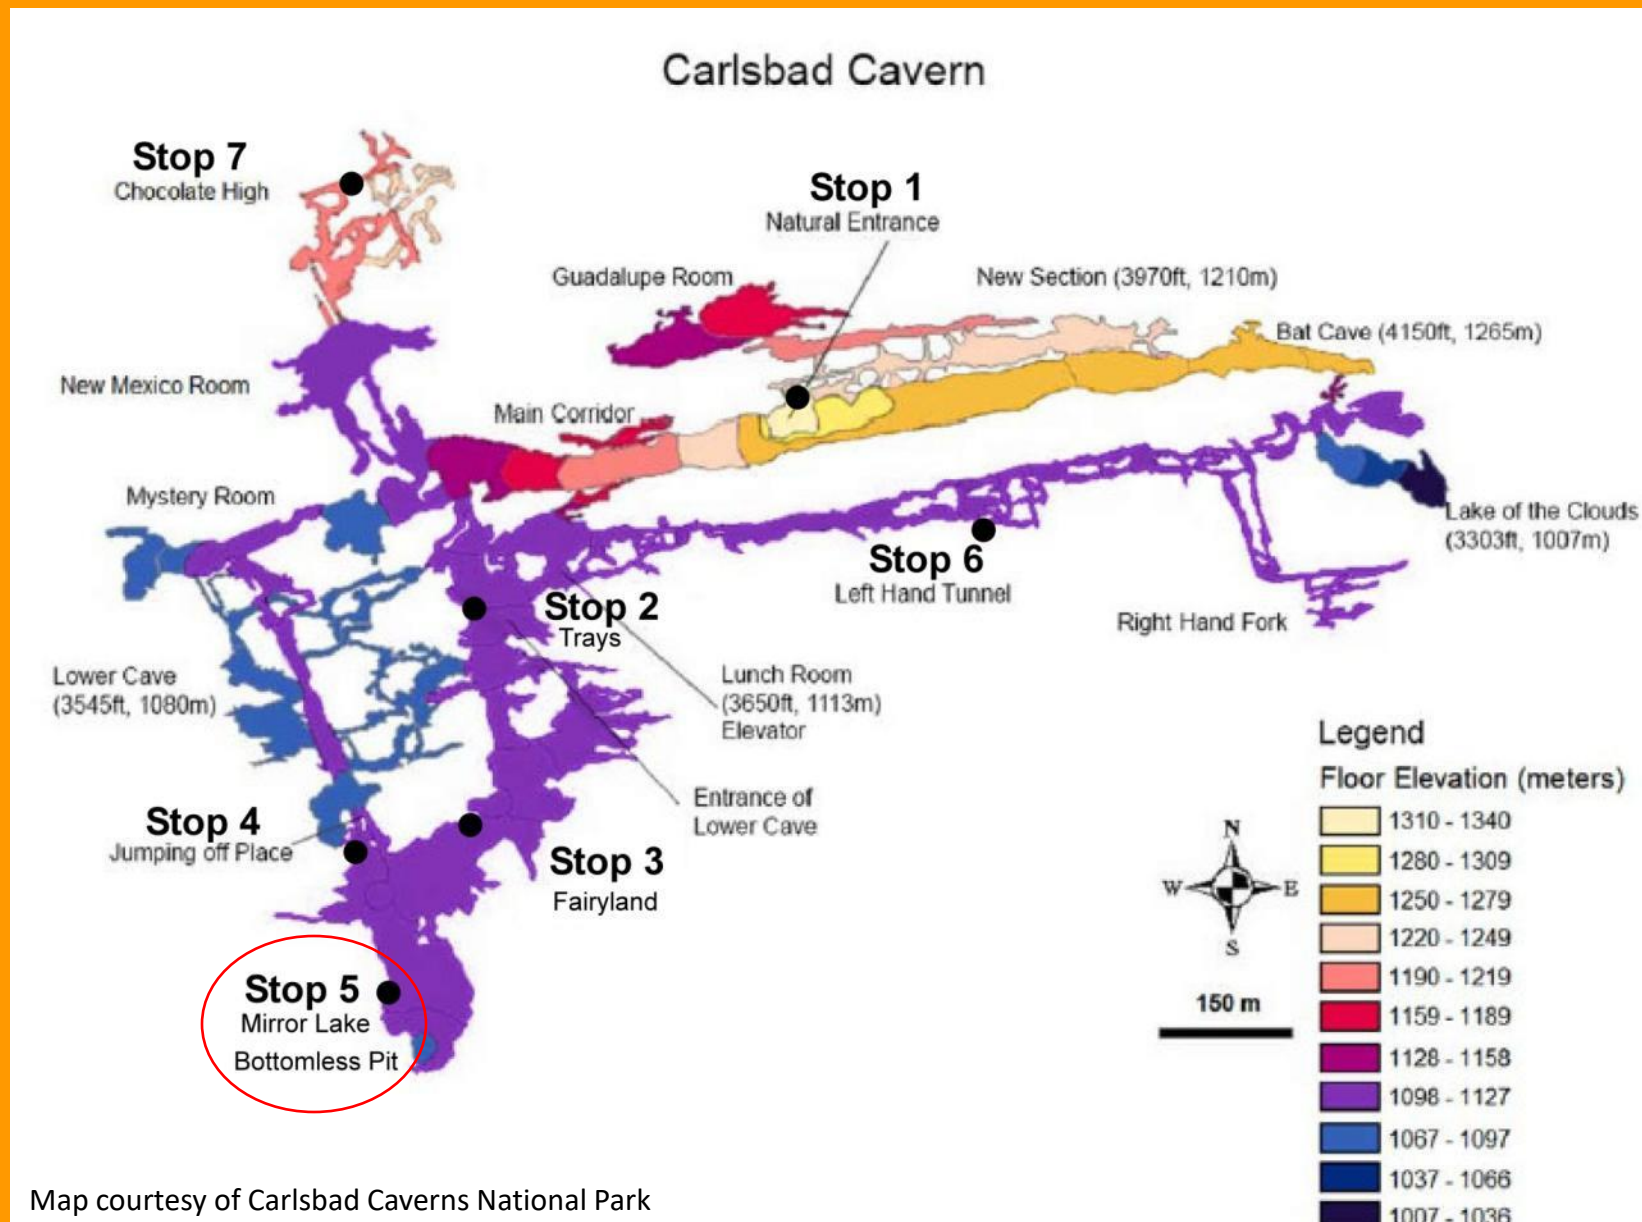

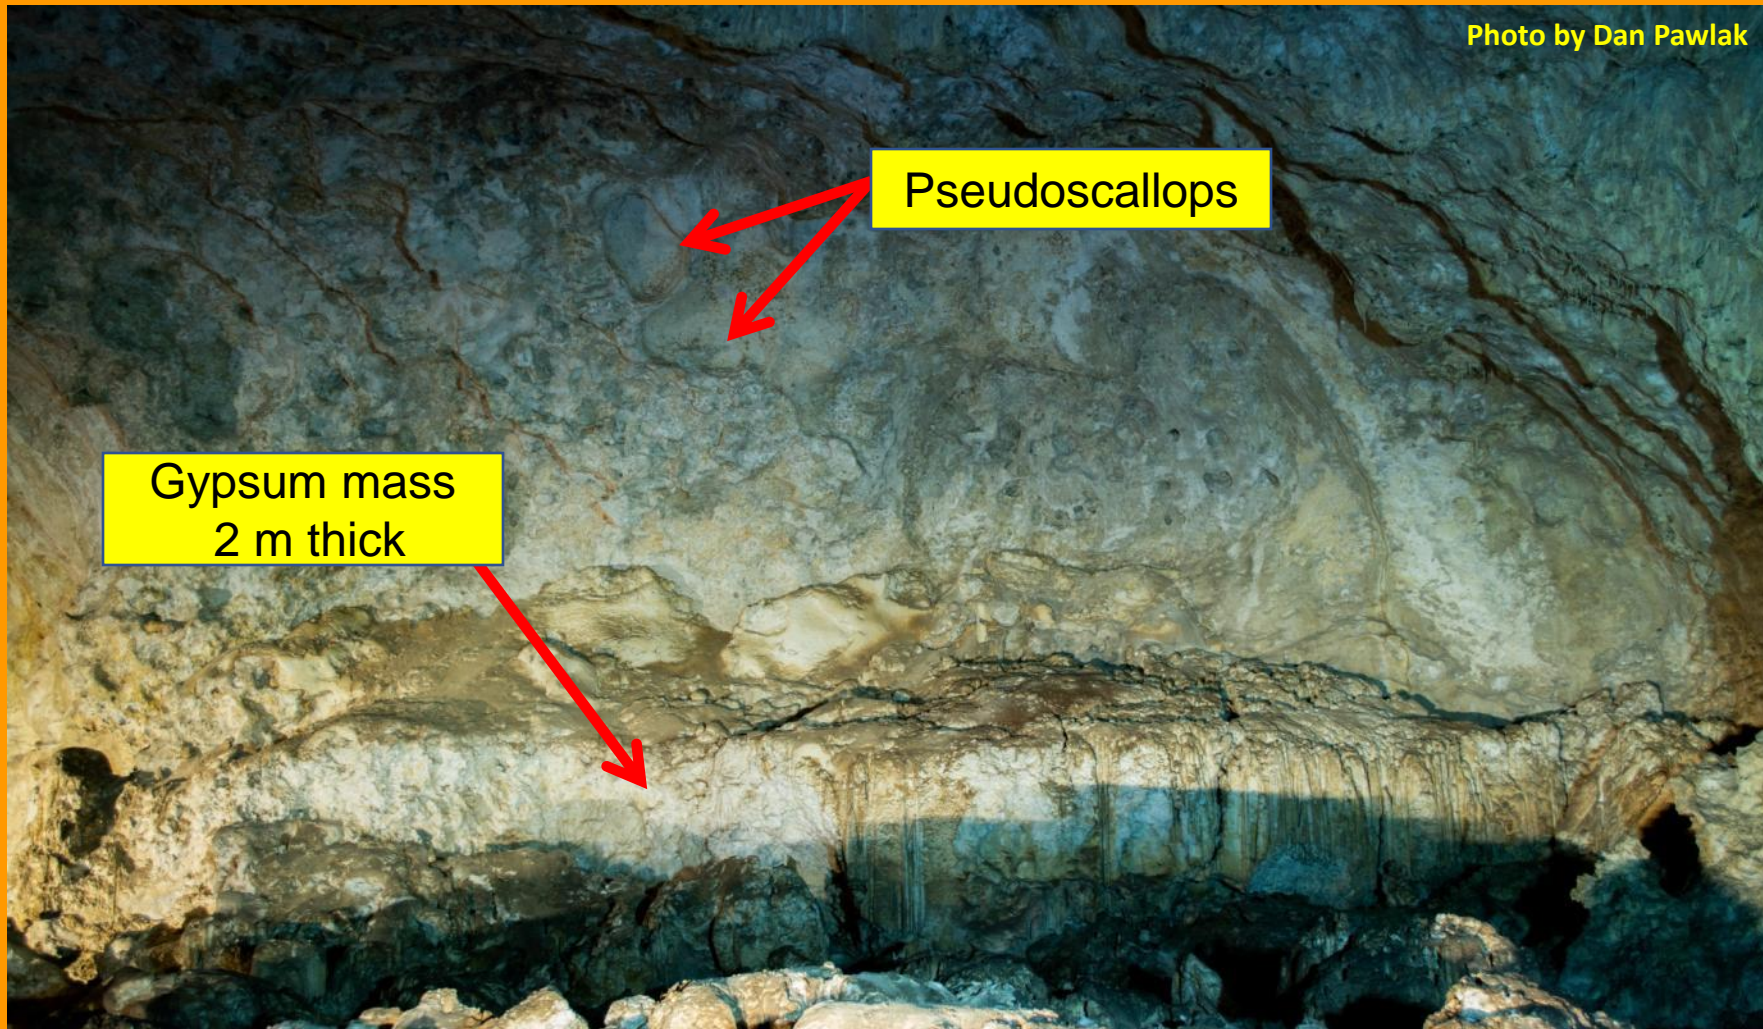

**Stop 5. Massive precipitated gypsum near Mirror Lake, Big Room, Carlsbad Cavern. Mass is approximately 2 m thick.**

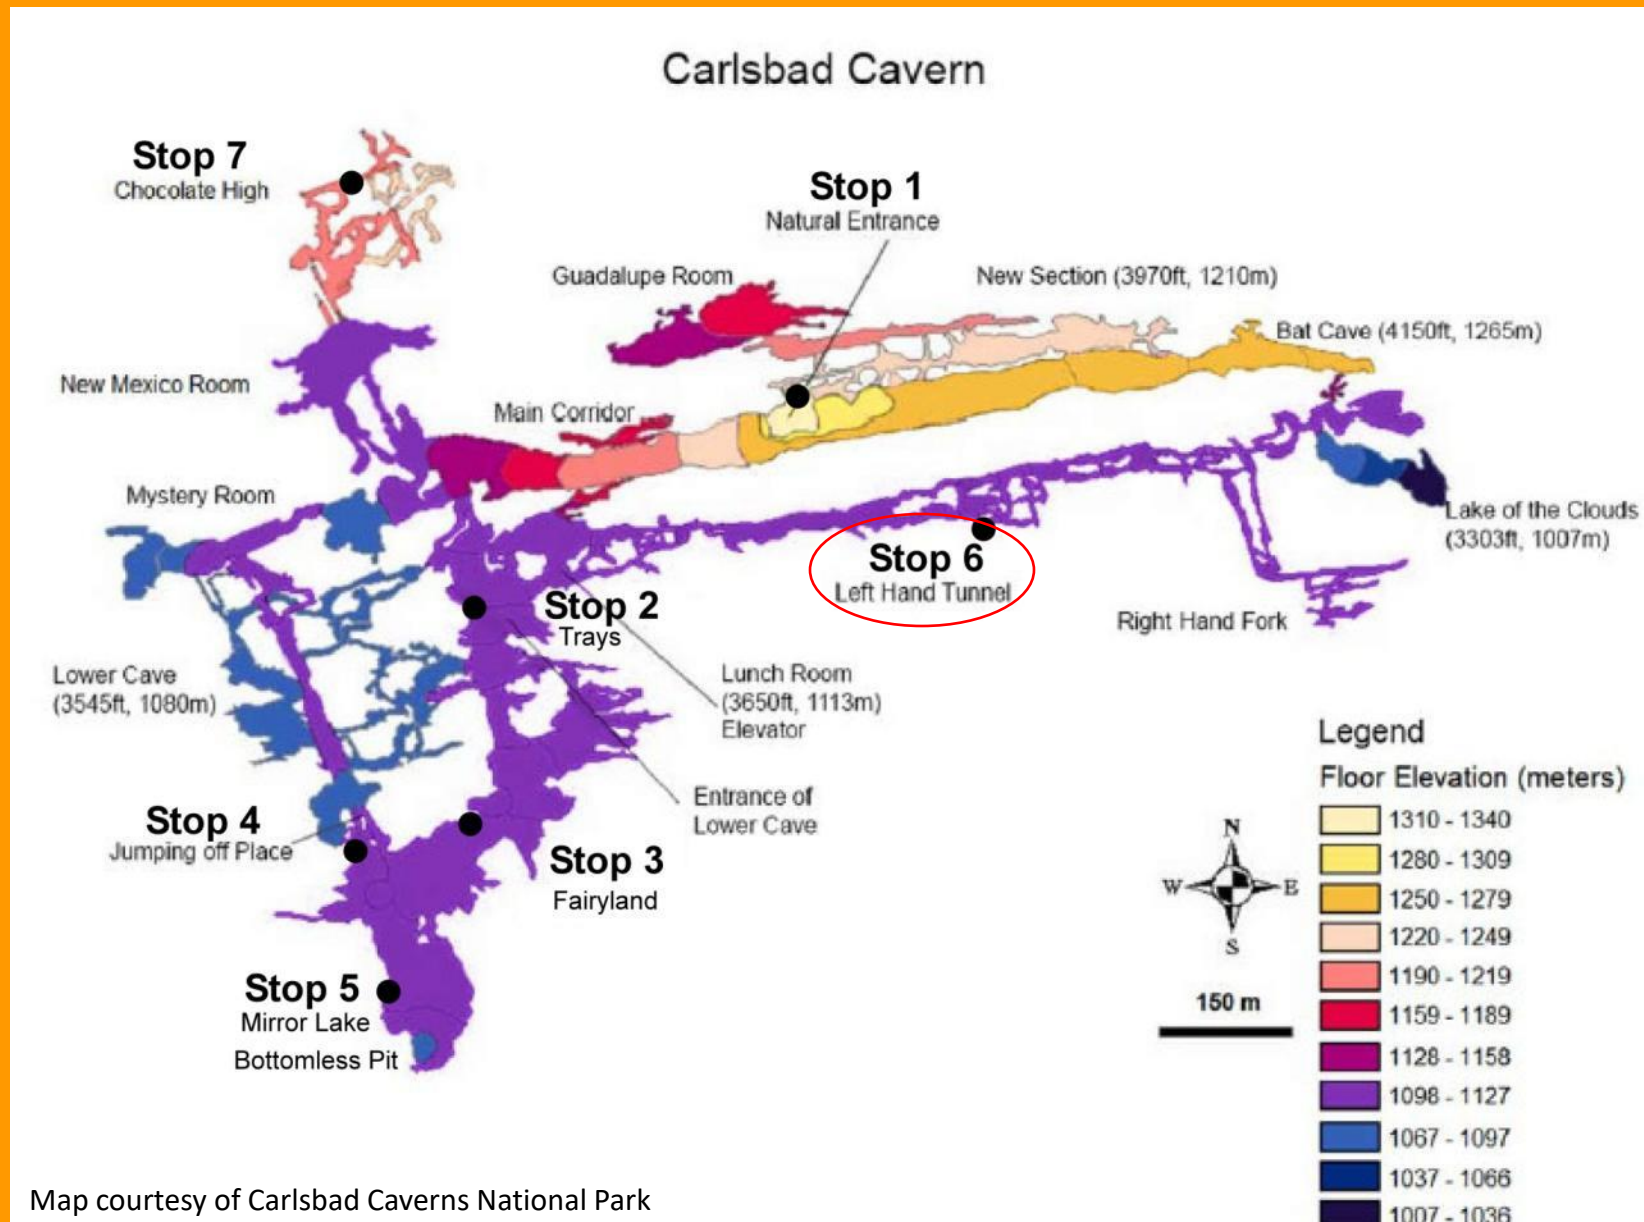

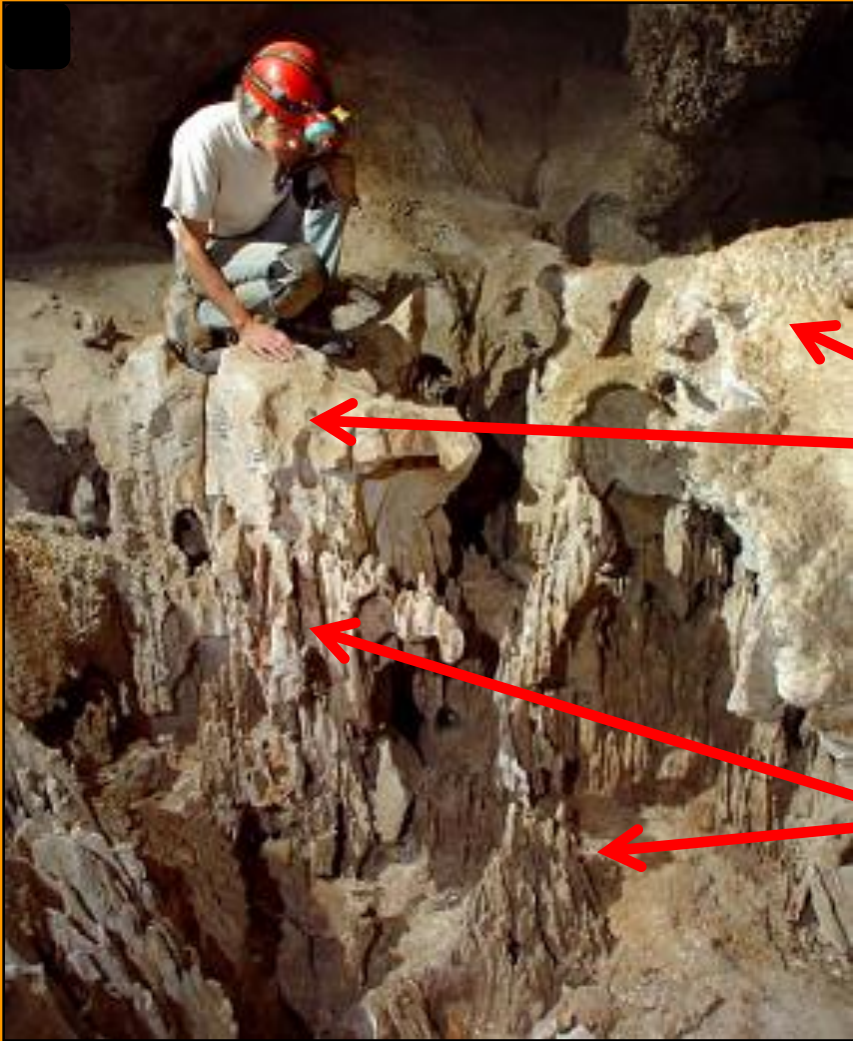

**Stop 6. Solution rills near Left Hand Tunnel, Carlsbad Cavern.  
Photo by Art Palmer**

**Smooth caps above rills  
were probably covered  
with gypsum paste at  
time rills were forming.**

**Rills were dissolved  
when acid seeped from  
gypsum cap and flowed  
downward by gravity.**

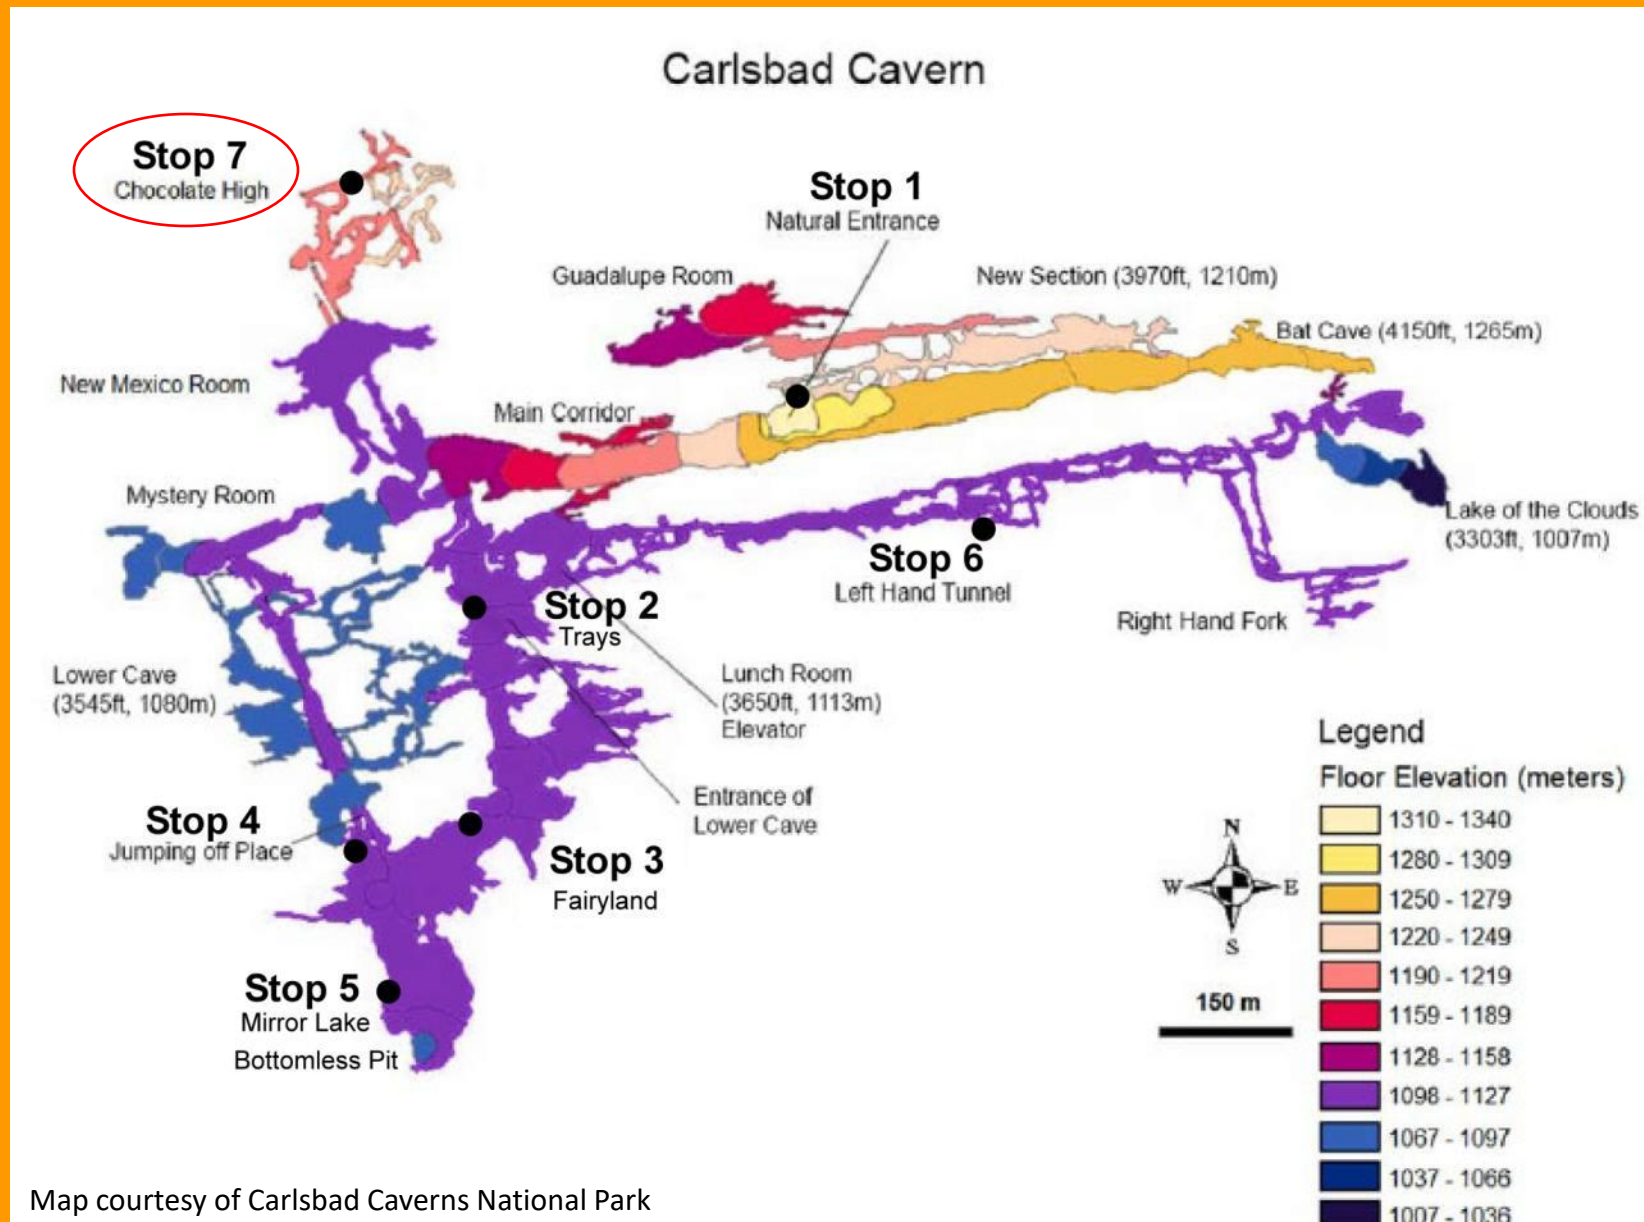

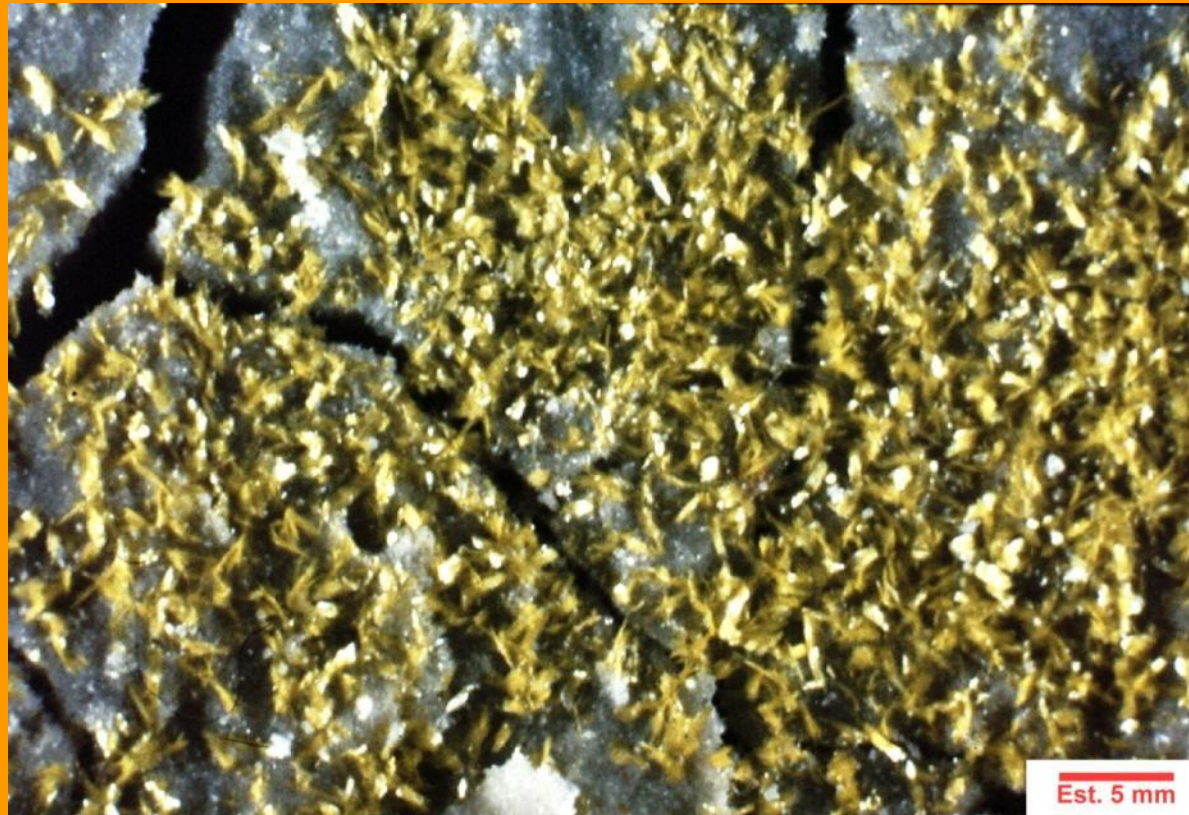

**Stop 7. Tyuyamunite or metatyuyamunite, Chocolate High, Carlsbad Cavern. The chemical composition of tyuyamunite is  $\text{Ca}(\text{UO}_2)_2(\text{VO}_4)_2 \cdot 5-8\text{H}_2\text{O}$ . Metatyuyamunite is the dehydrated variant composed of  $\text{Ca}(\text{UO}_2)_2(\text{VO}_4)_2 \cdot 3\text{H}_2\text{O}$ . Metatyuyamunite is more likely to be found in Guadalupe caves. Photo slightly out of focus.**

# LECHUGUILLA CAVE NEW MEXICO USA

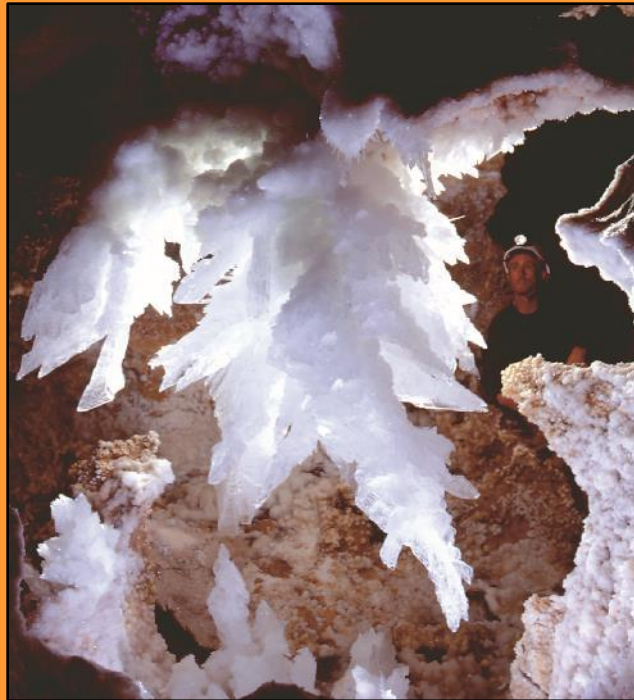

David Harris, Harris Photographic

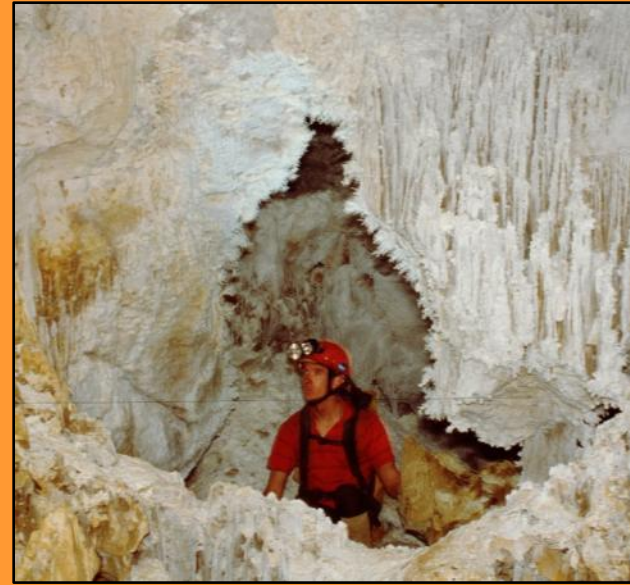

David Harris, Harris Photographic

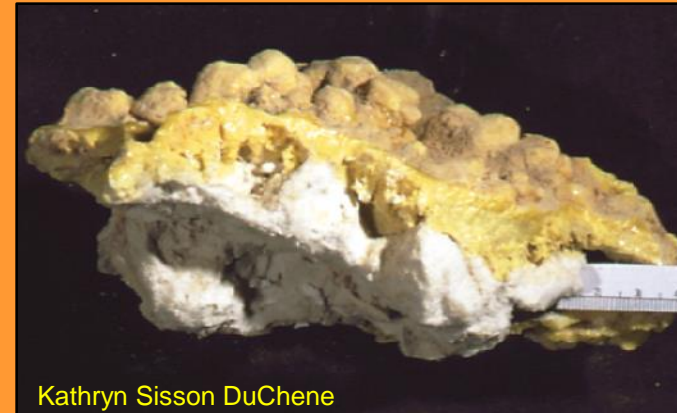

Kathryn Sisson DuChene

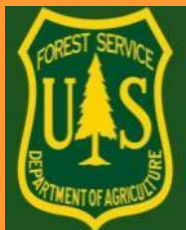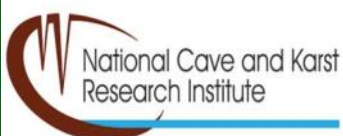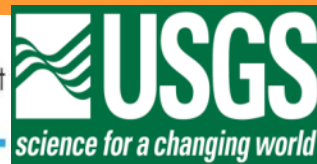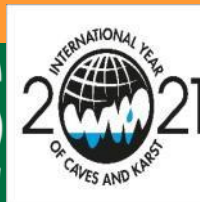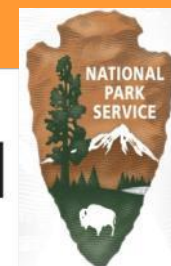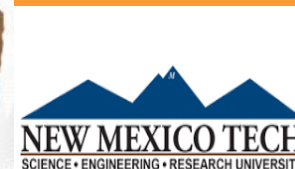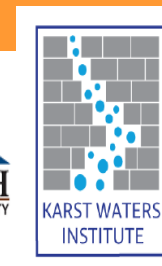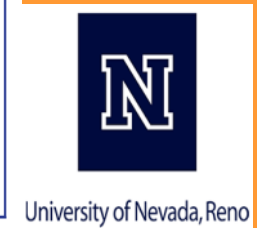

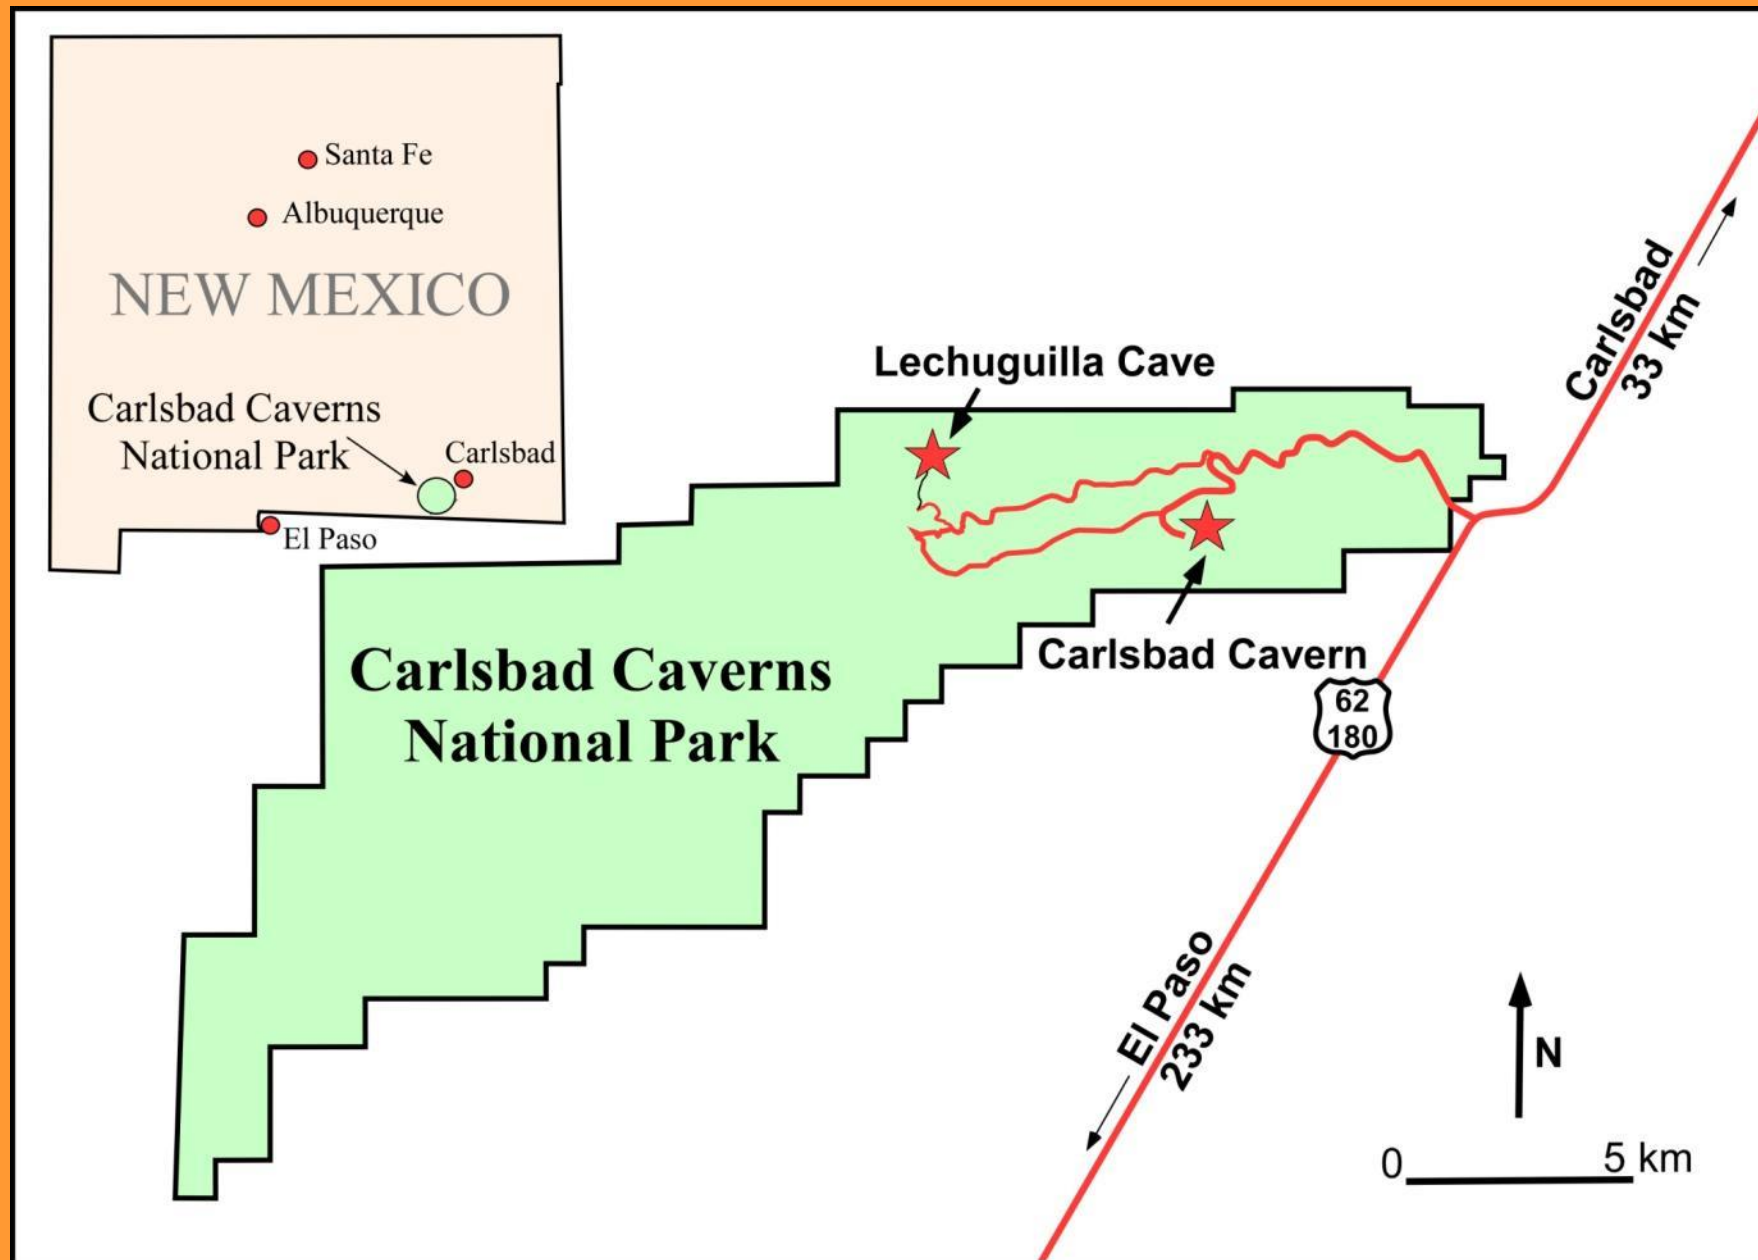

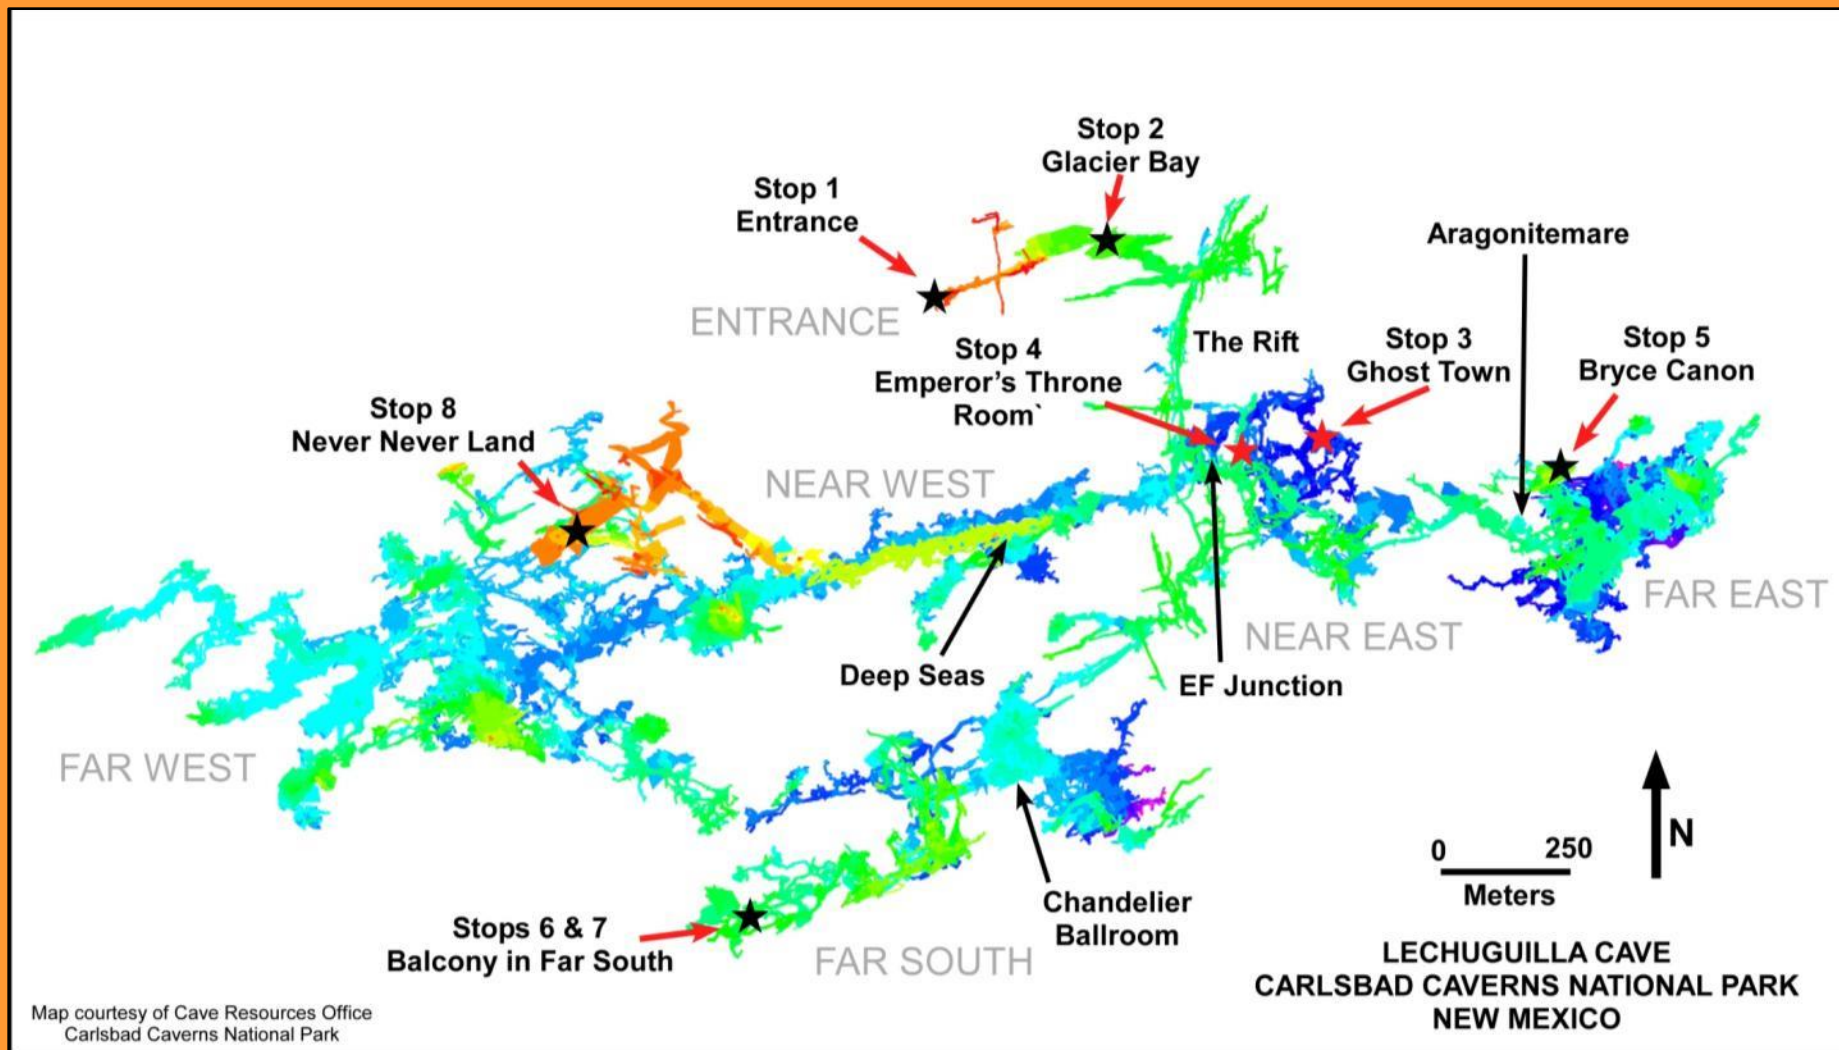

**Lechuguilla Cave is a rectilinear, multi-level, 3-dimensional maze with 241 km of known passage and a depth of 489 m. Highest level passages are shown in red and orange; lowest levels are blue and purple.**

Photo by Kathryn Sisson DuChene

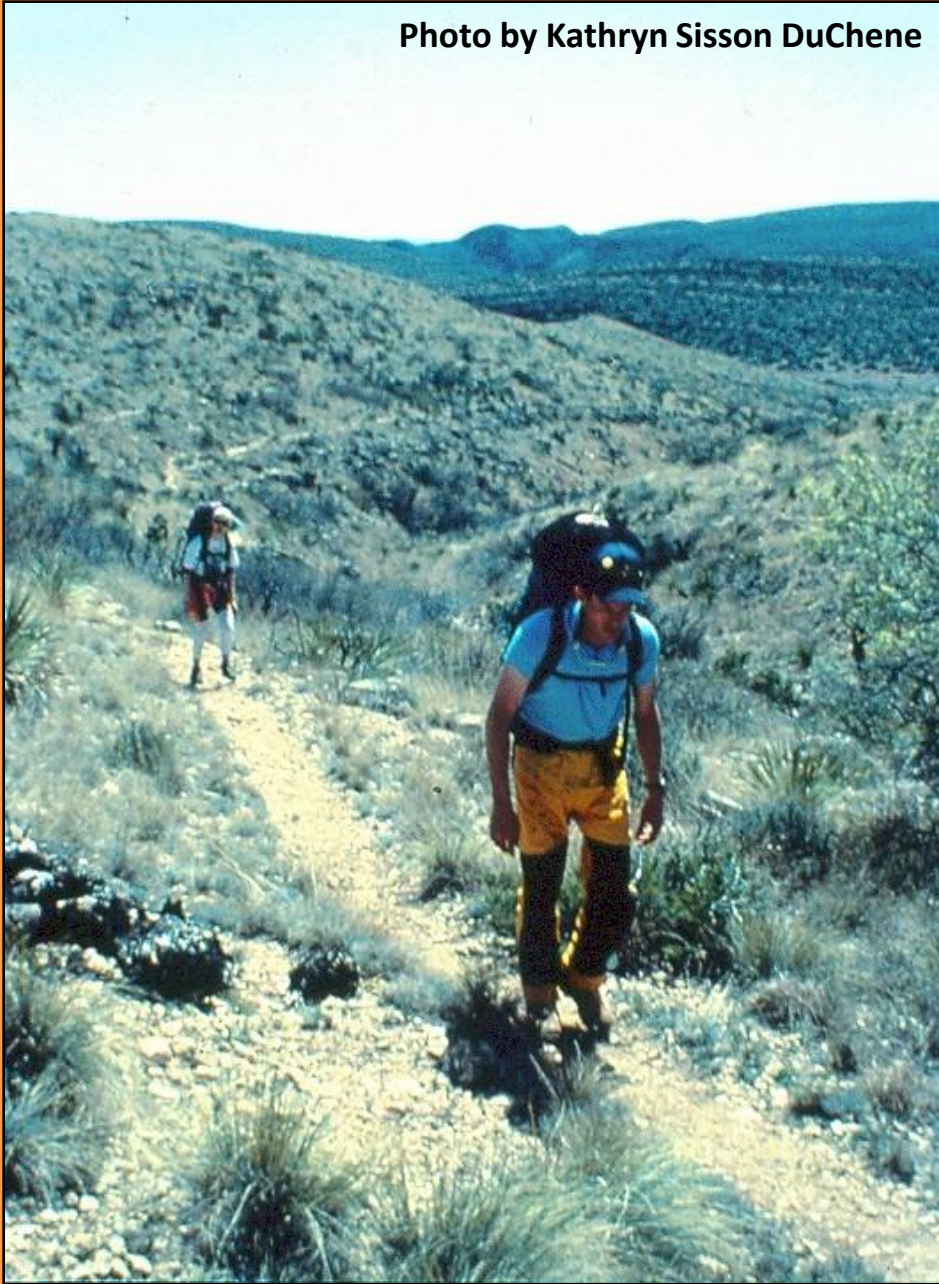

**Everything needed for an underground camping expedition must be carried into and out of the cave in 45 to 70 lb backpacks**

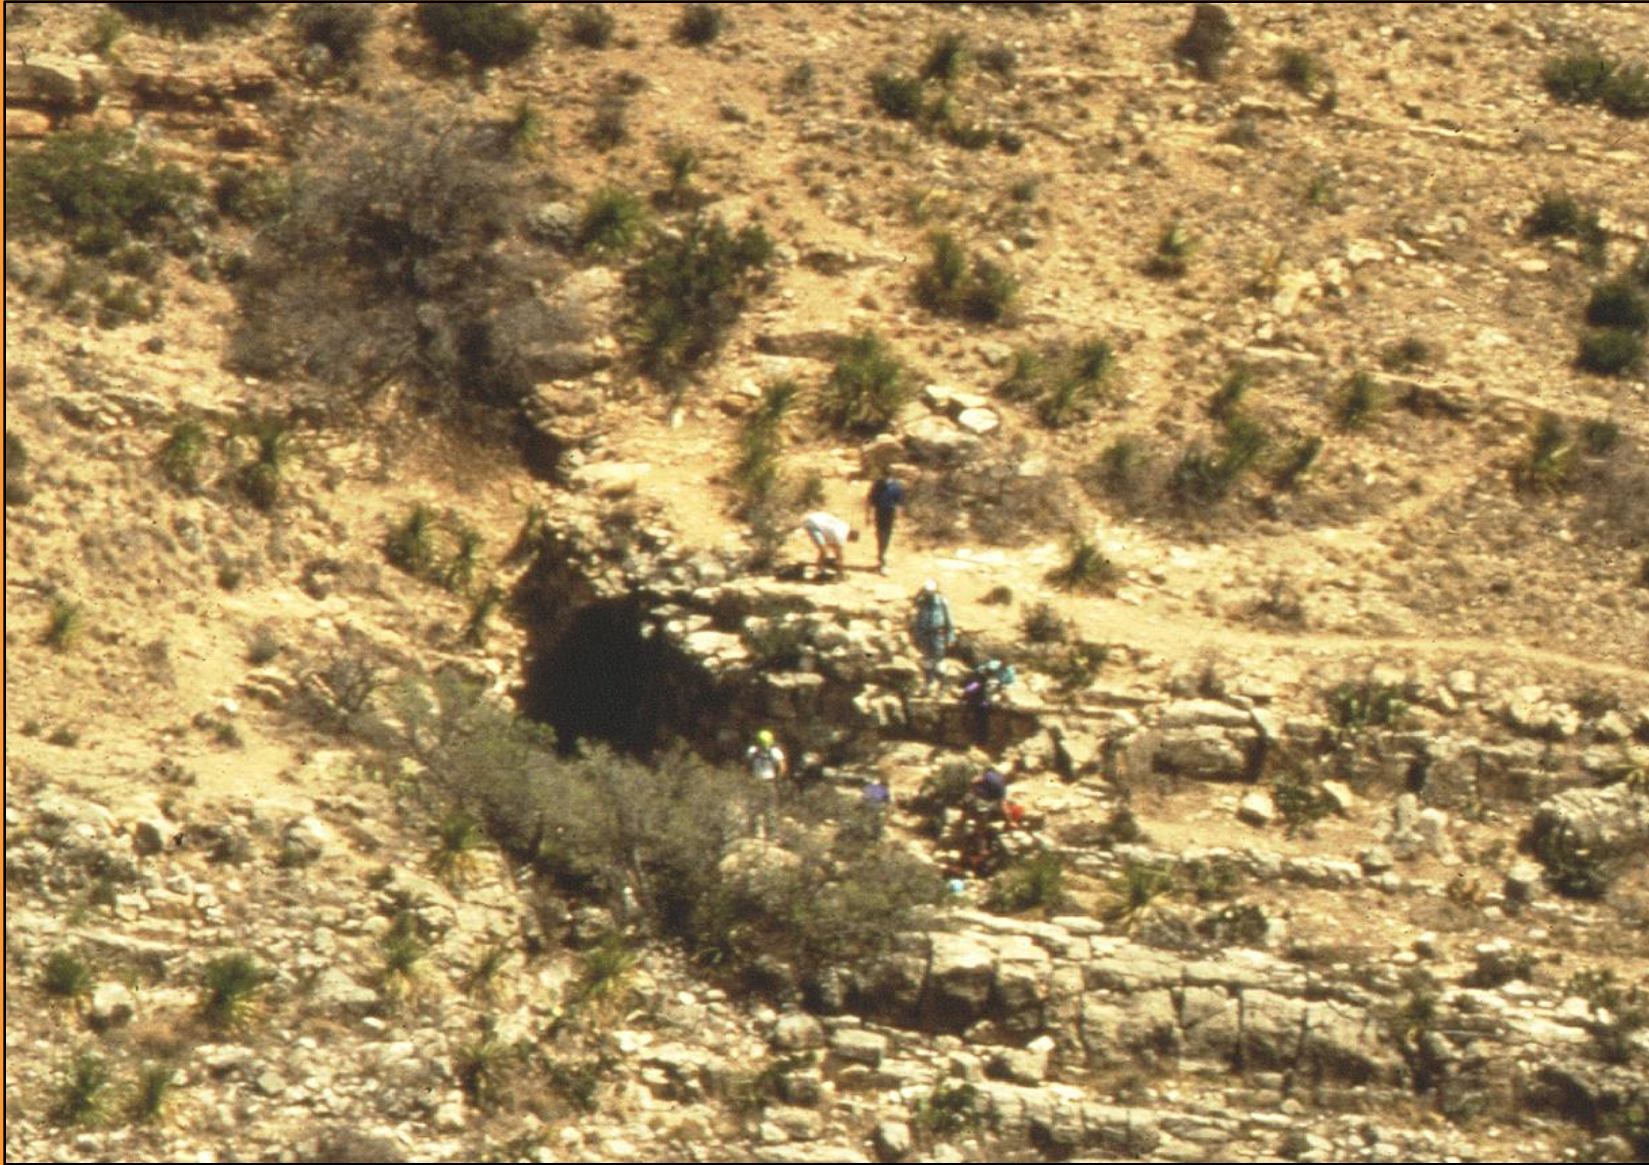

**Entrance to Lechuguilla Cave**

*Hypogenic Caves of the Great Basin: Chapter 4, Lechuguilla Cave*

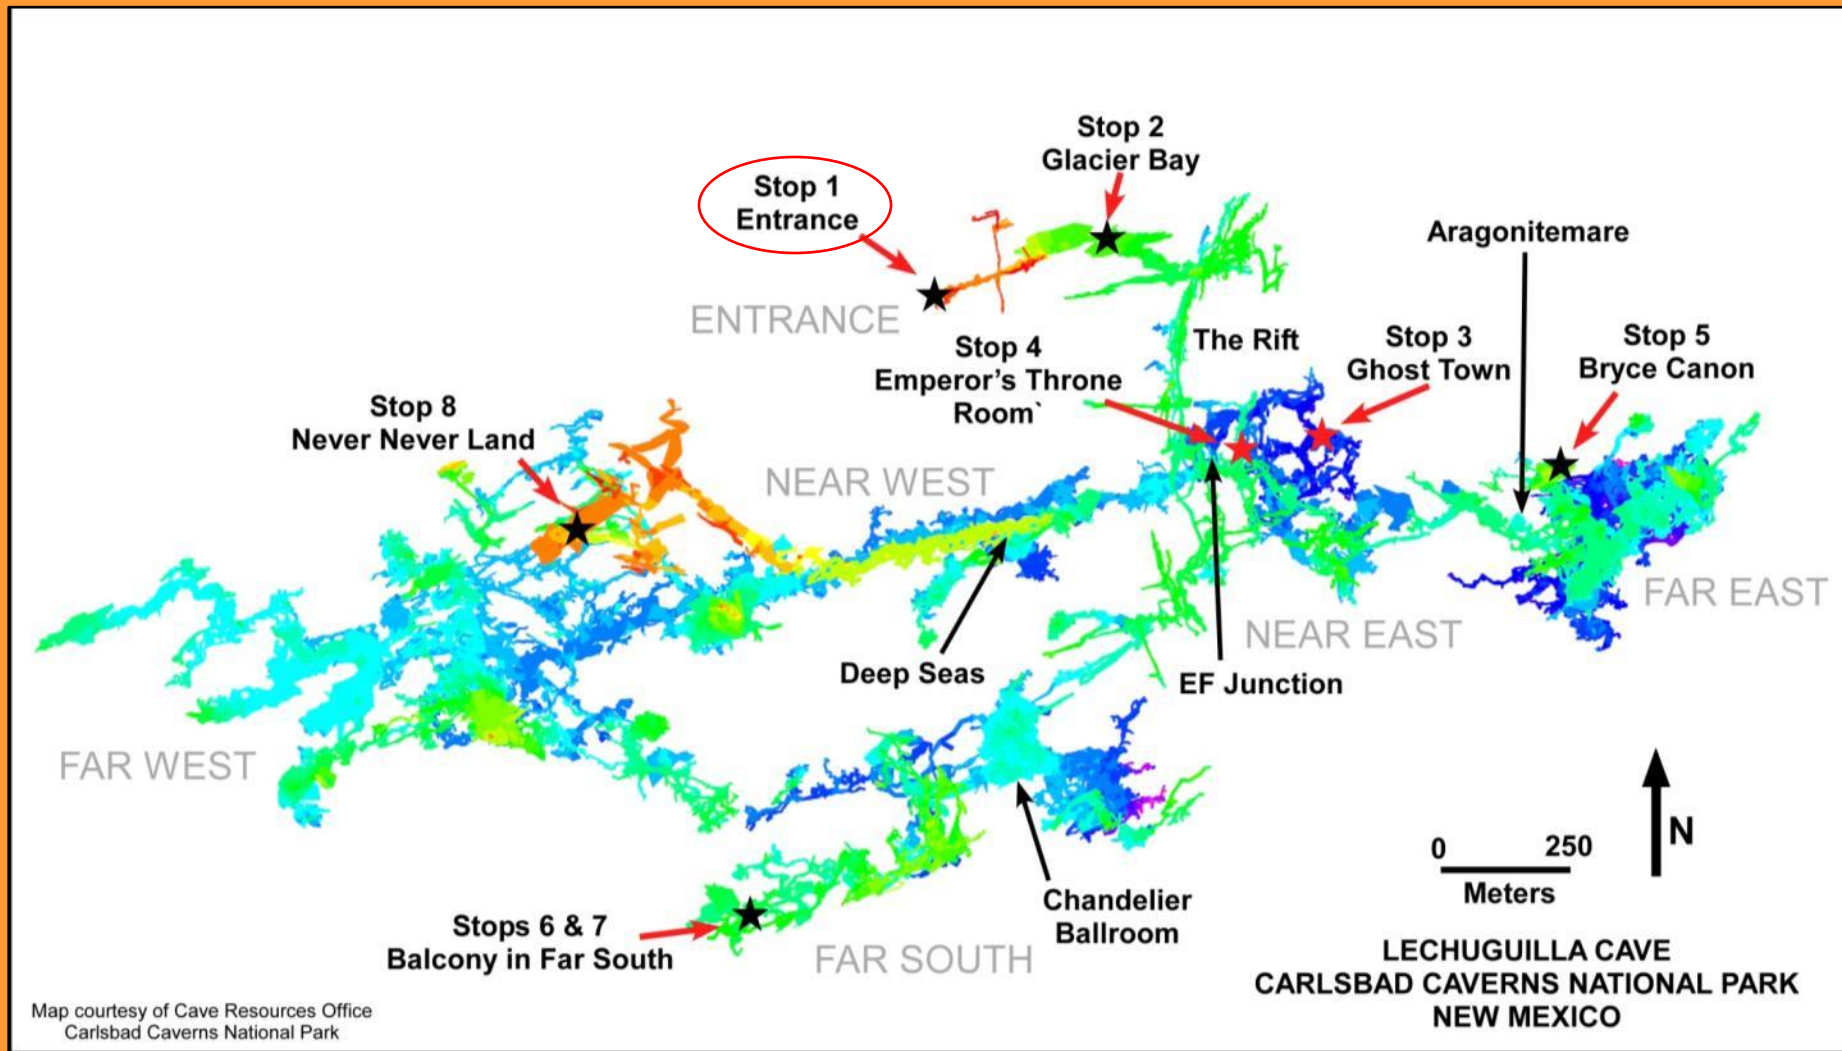

## Stop 4.1: Entrance

### Deep-seated speleogenesis

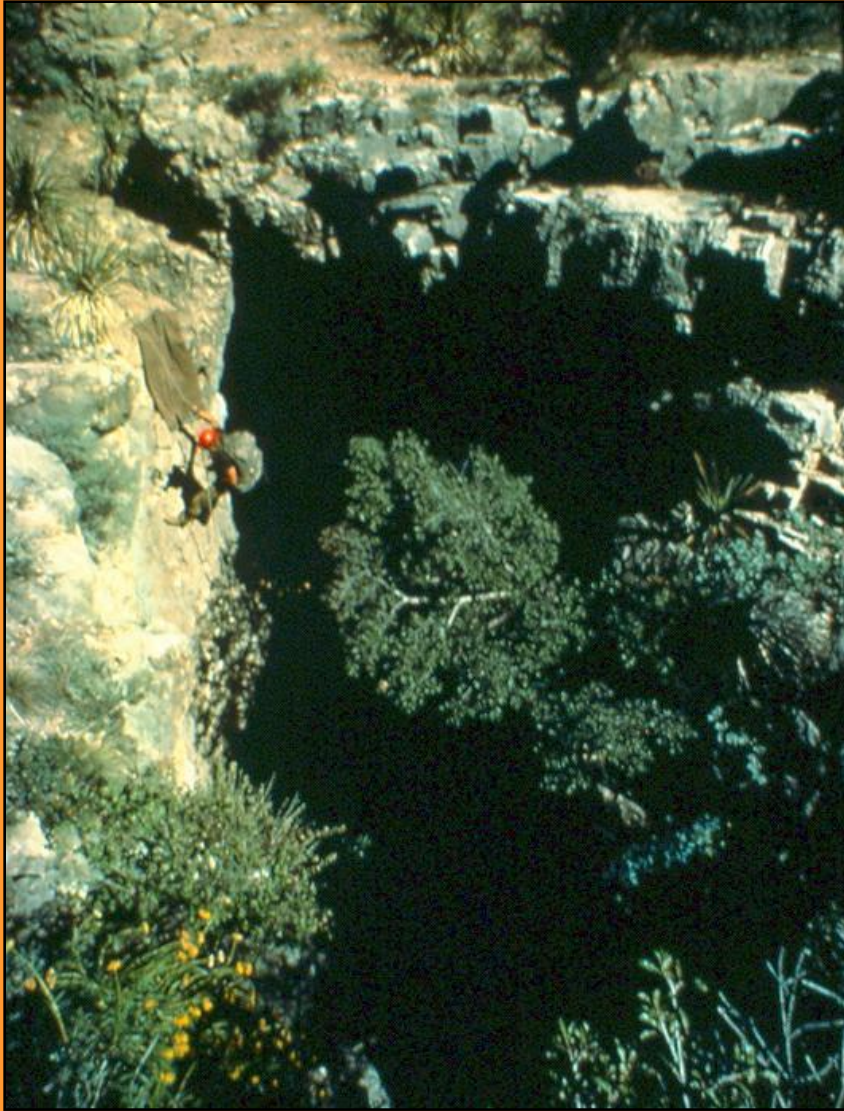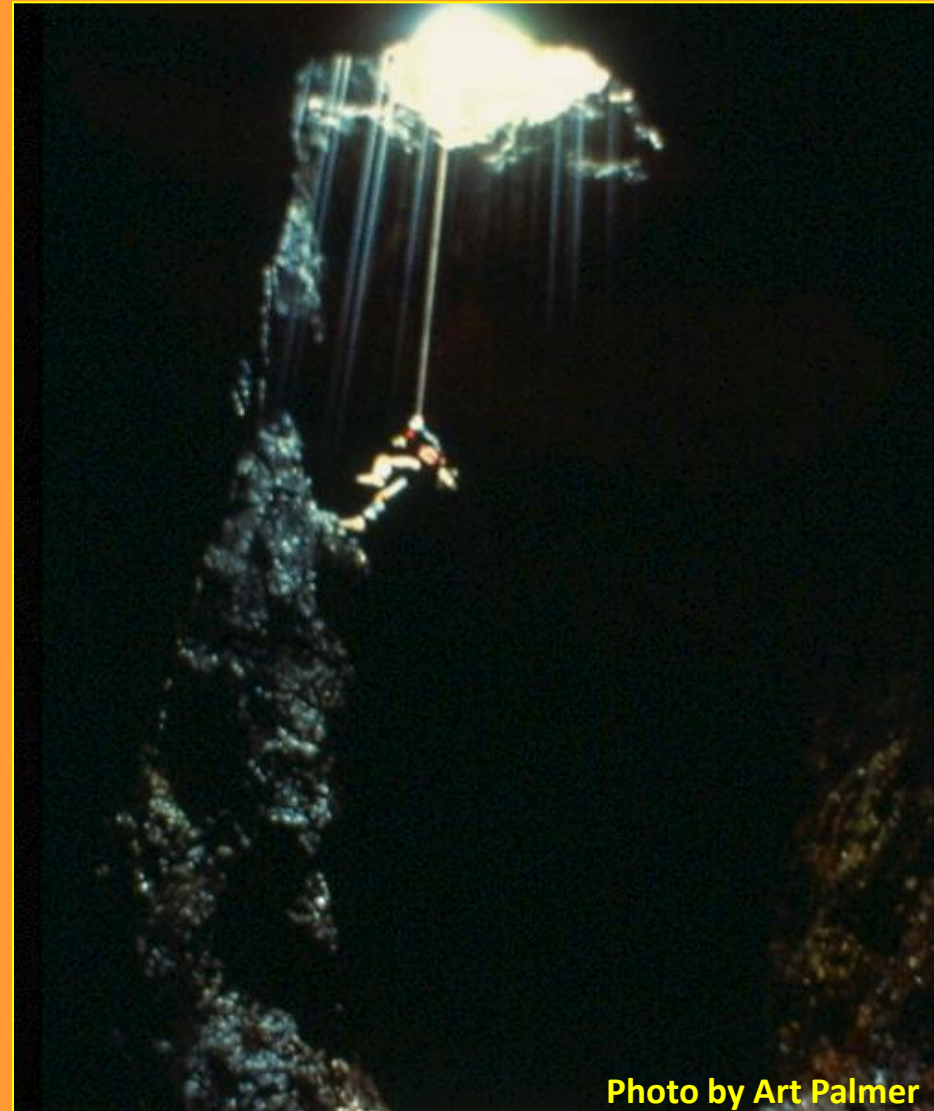

Photo by Art Palmer

**I was once asked “How far can you go in Lechuguilla before you need rope?” Well, the first step is 30 meters.**

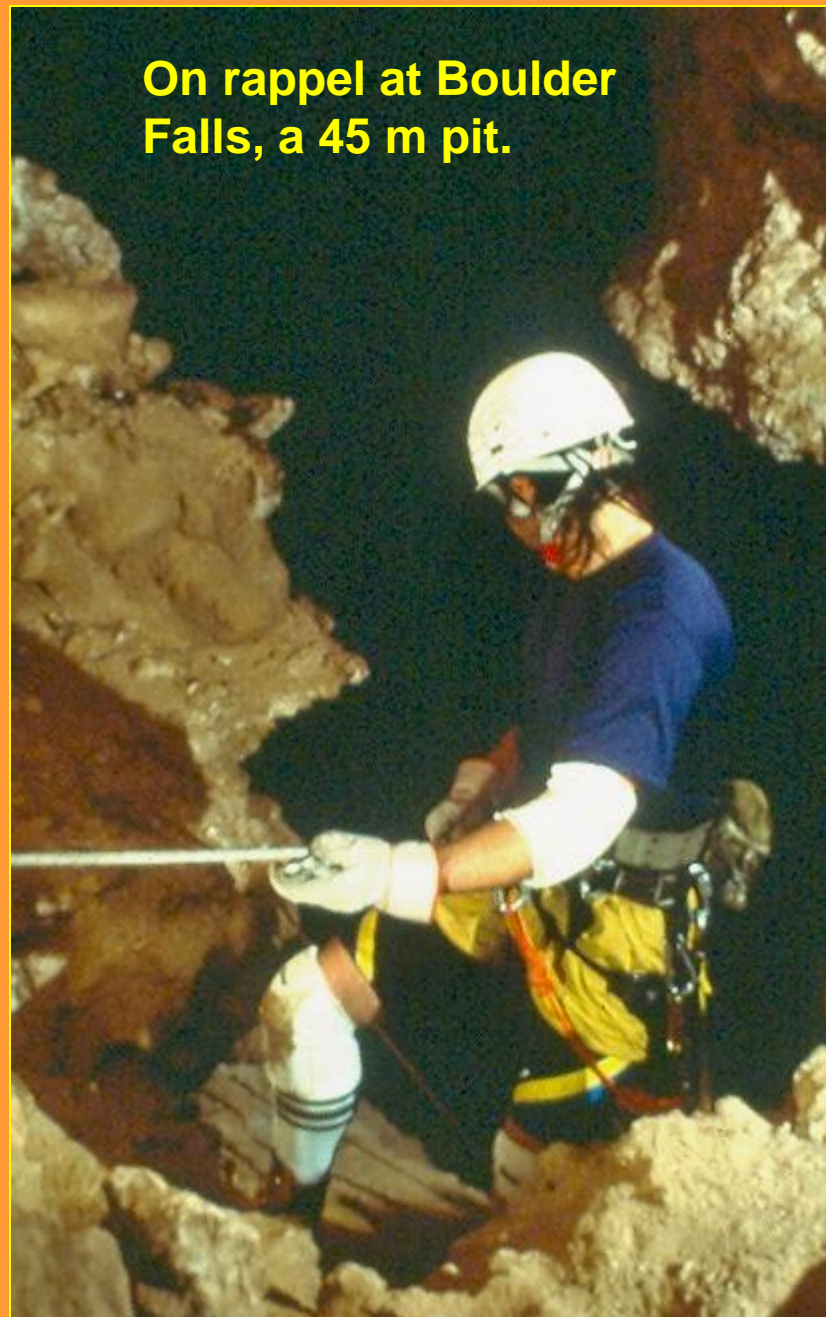

**On rappel at Boulder Falls, a 45 m pit.**

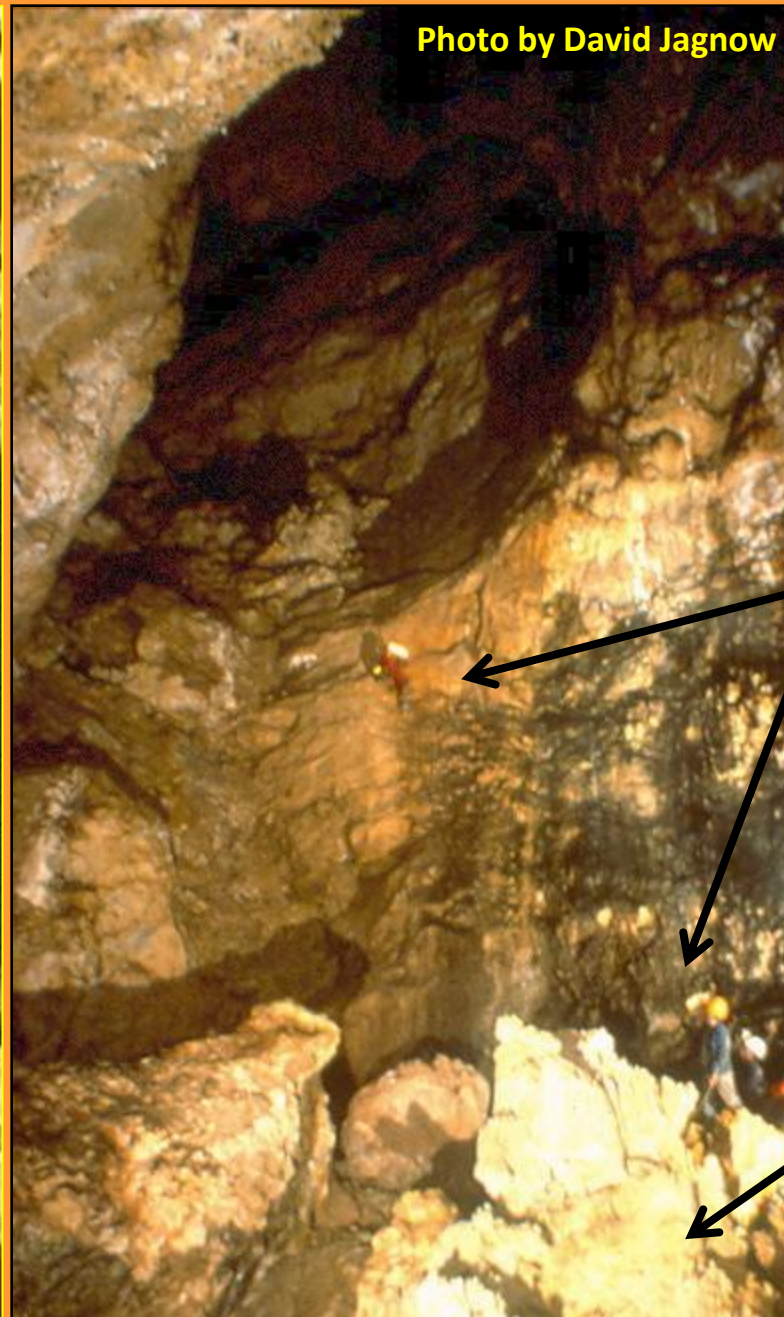

**Photo by David Jagnow**

**People  
for scale**

**First  
remnant  
gypsum  
blocks  
seen in  
the cave**

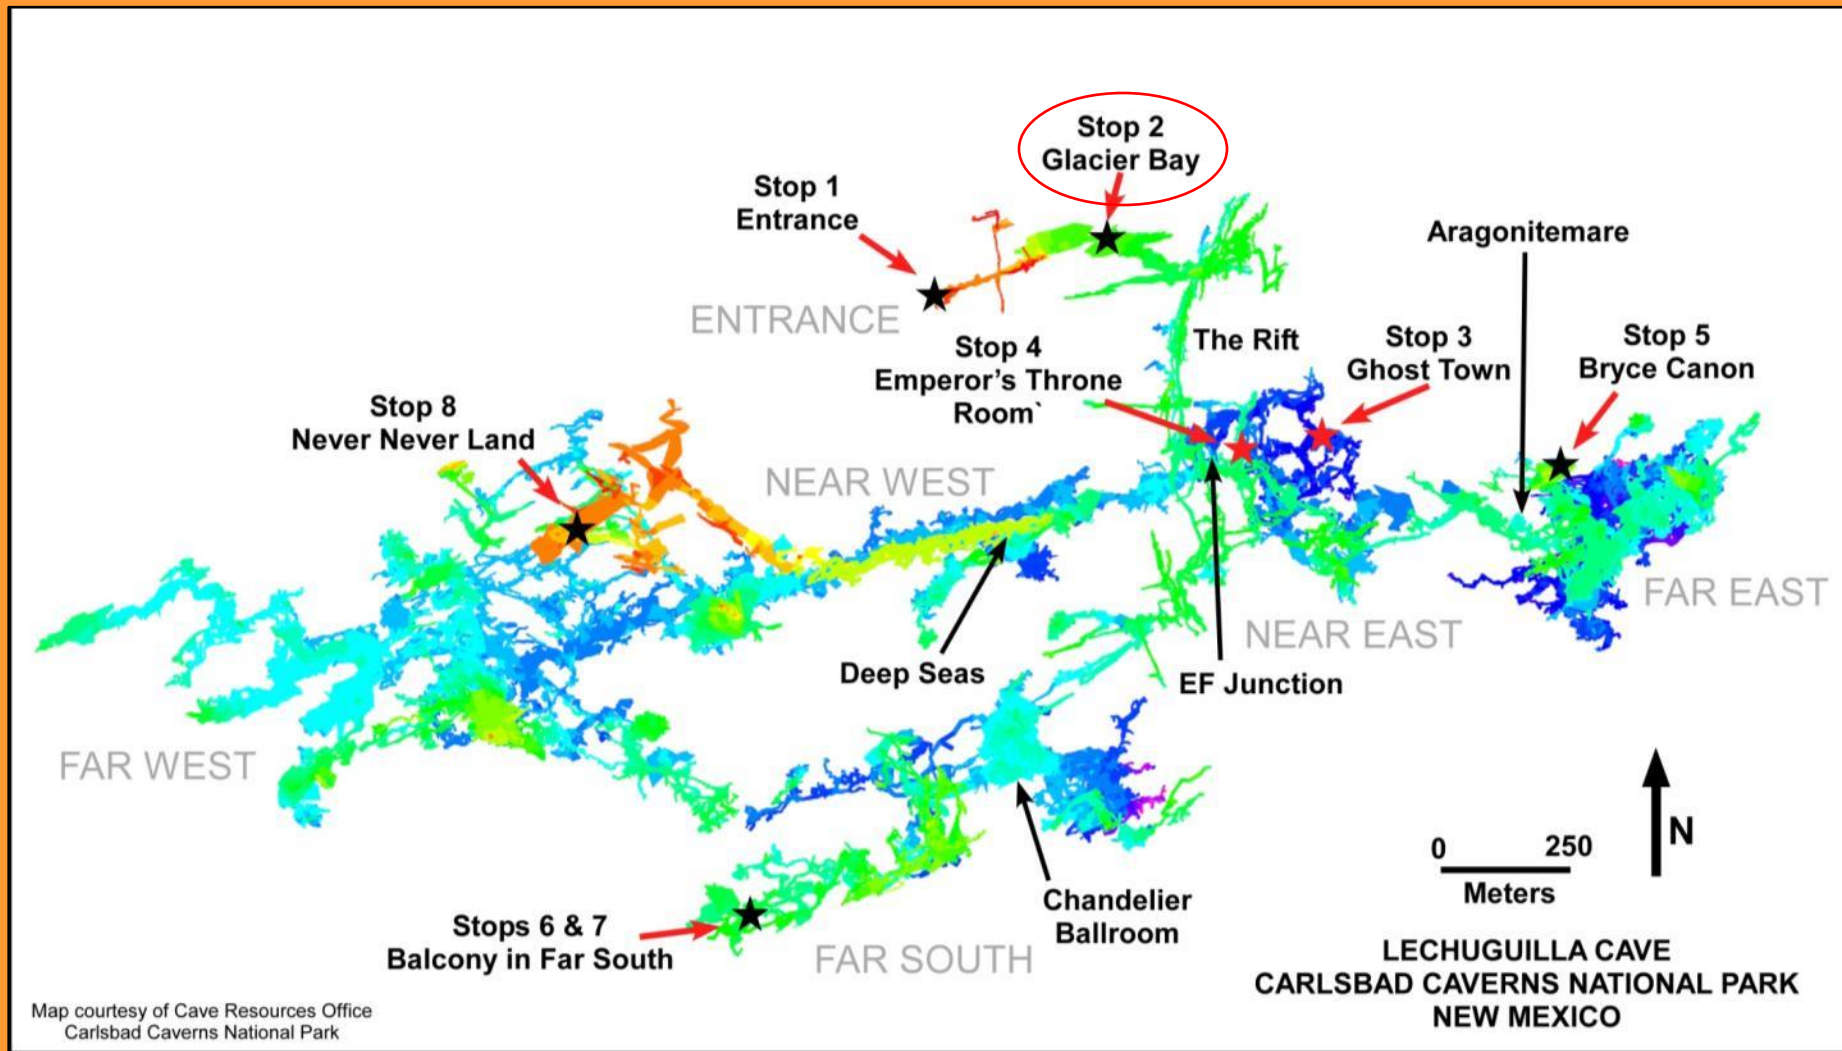

## Stop 4.2: Glacier Bay

### Massive gypsum

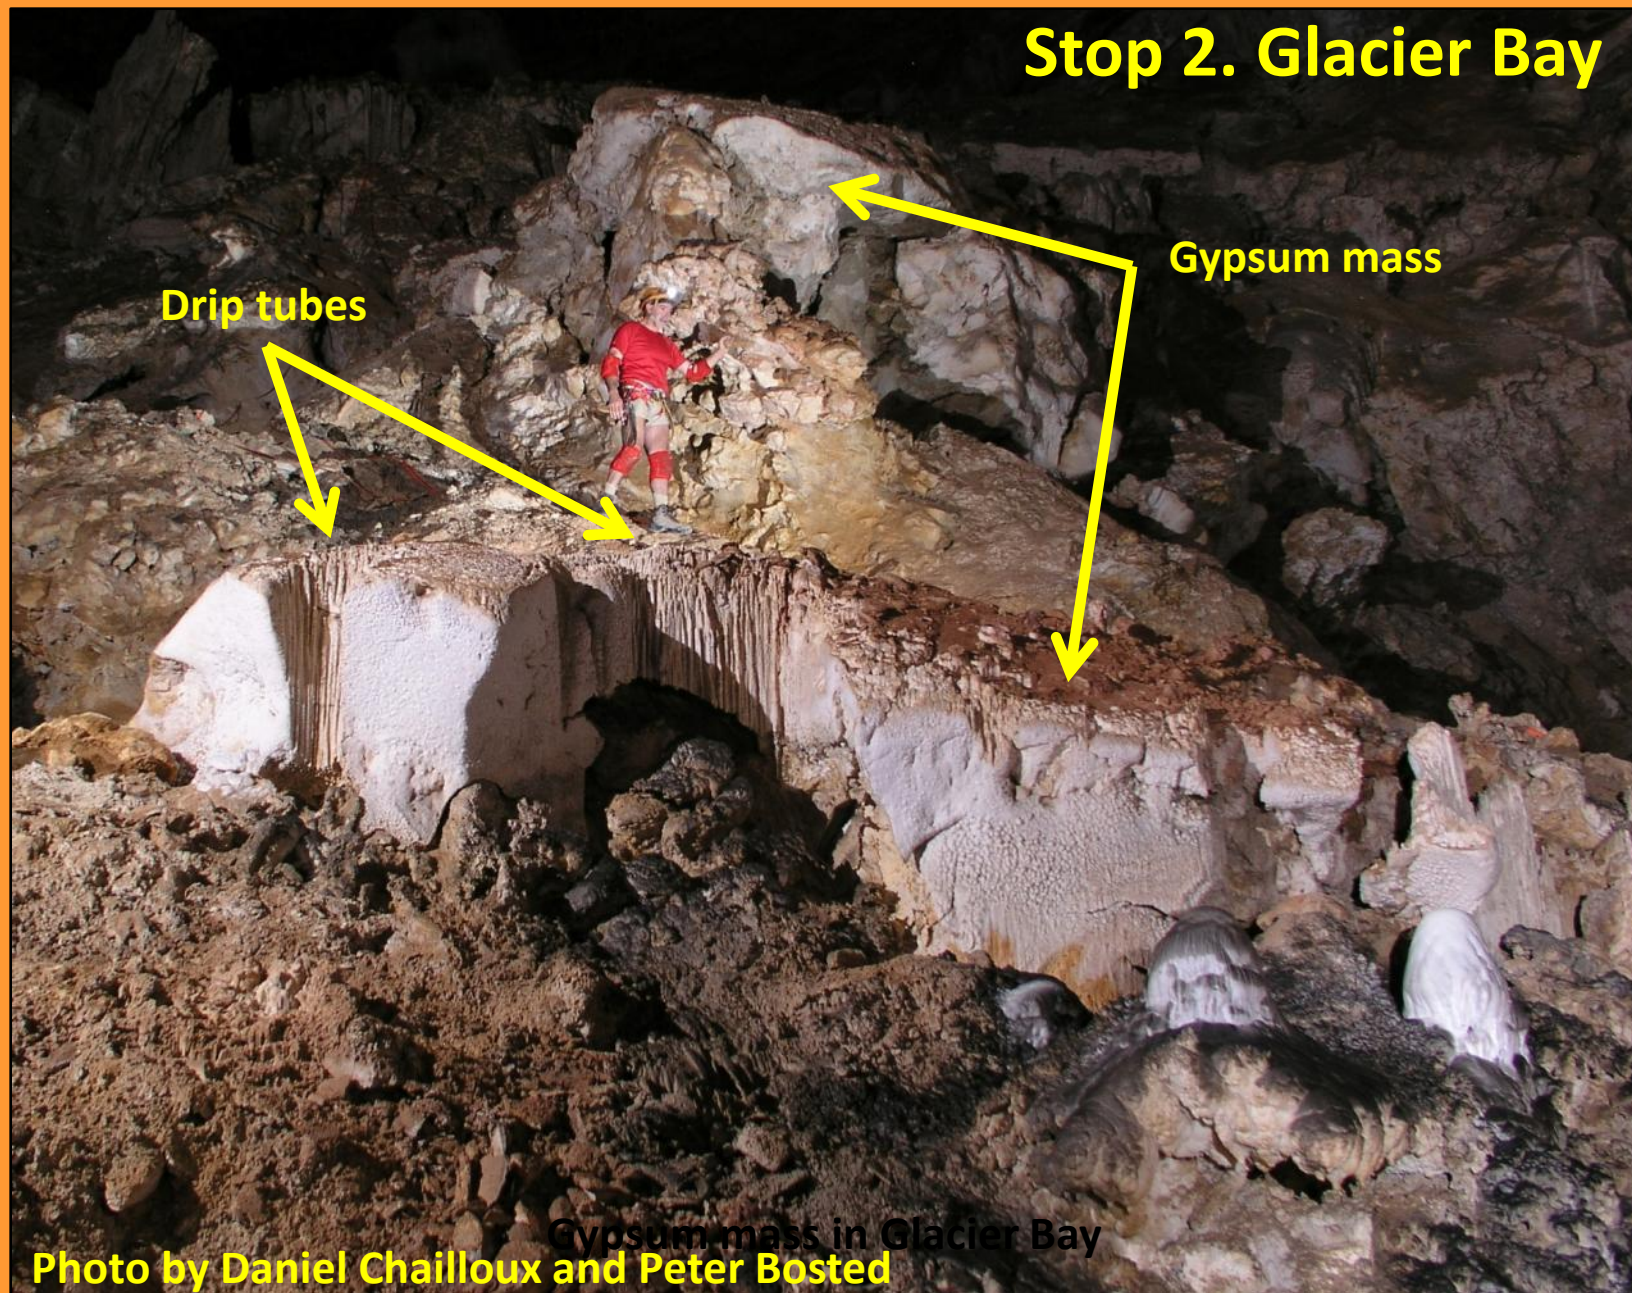

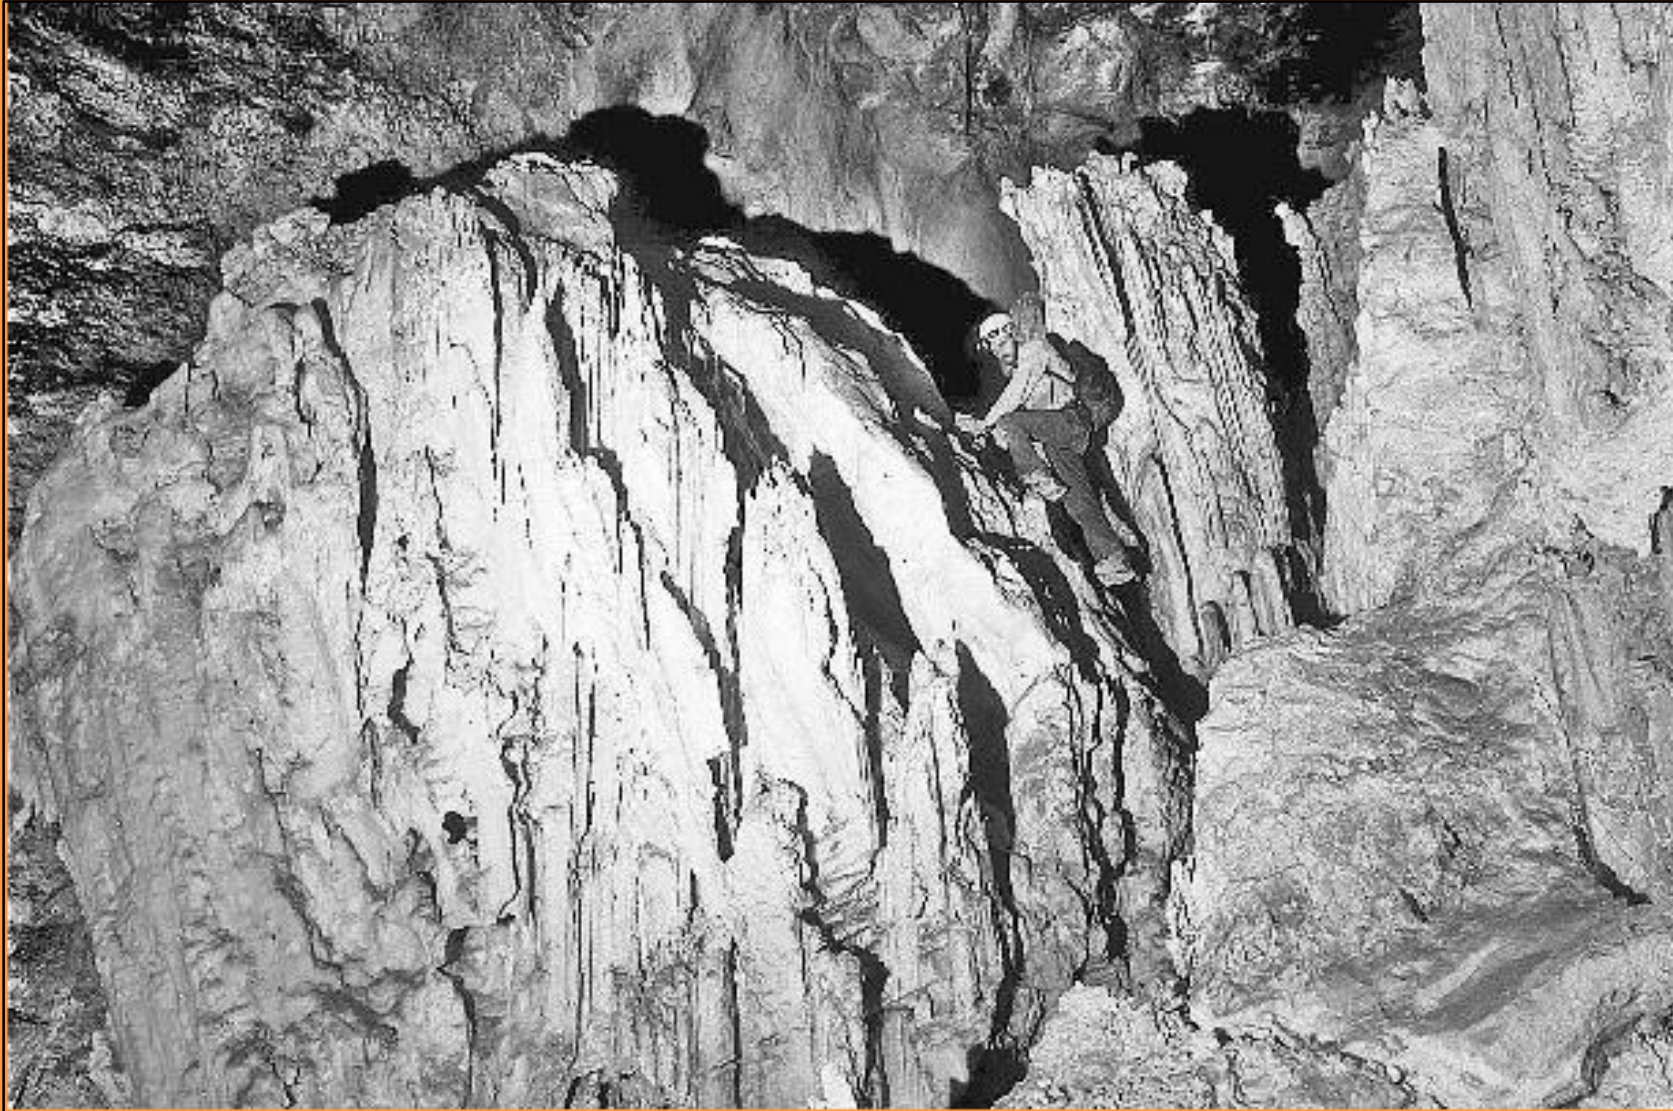

**Note multiple orientations of drip tubes due to settling of gypsum.**

*Hypogenic Caves of the Great Basin: Chapter 4, Lechuguilla Cave*

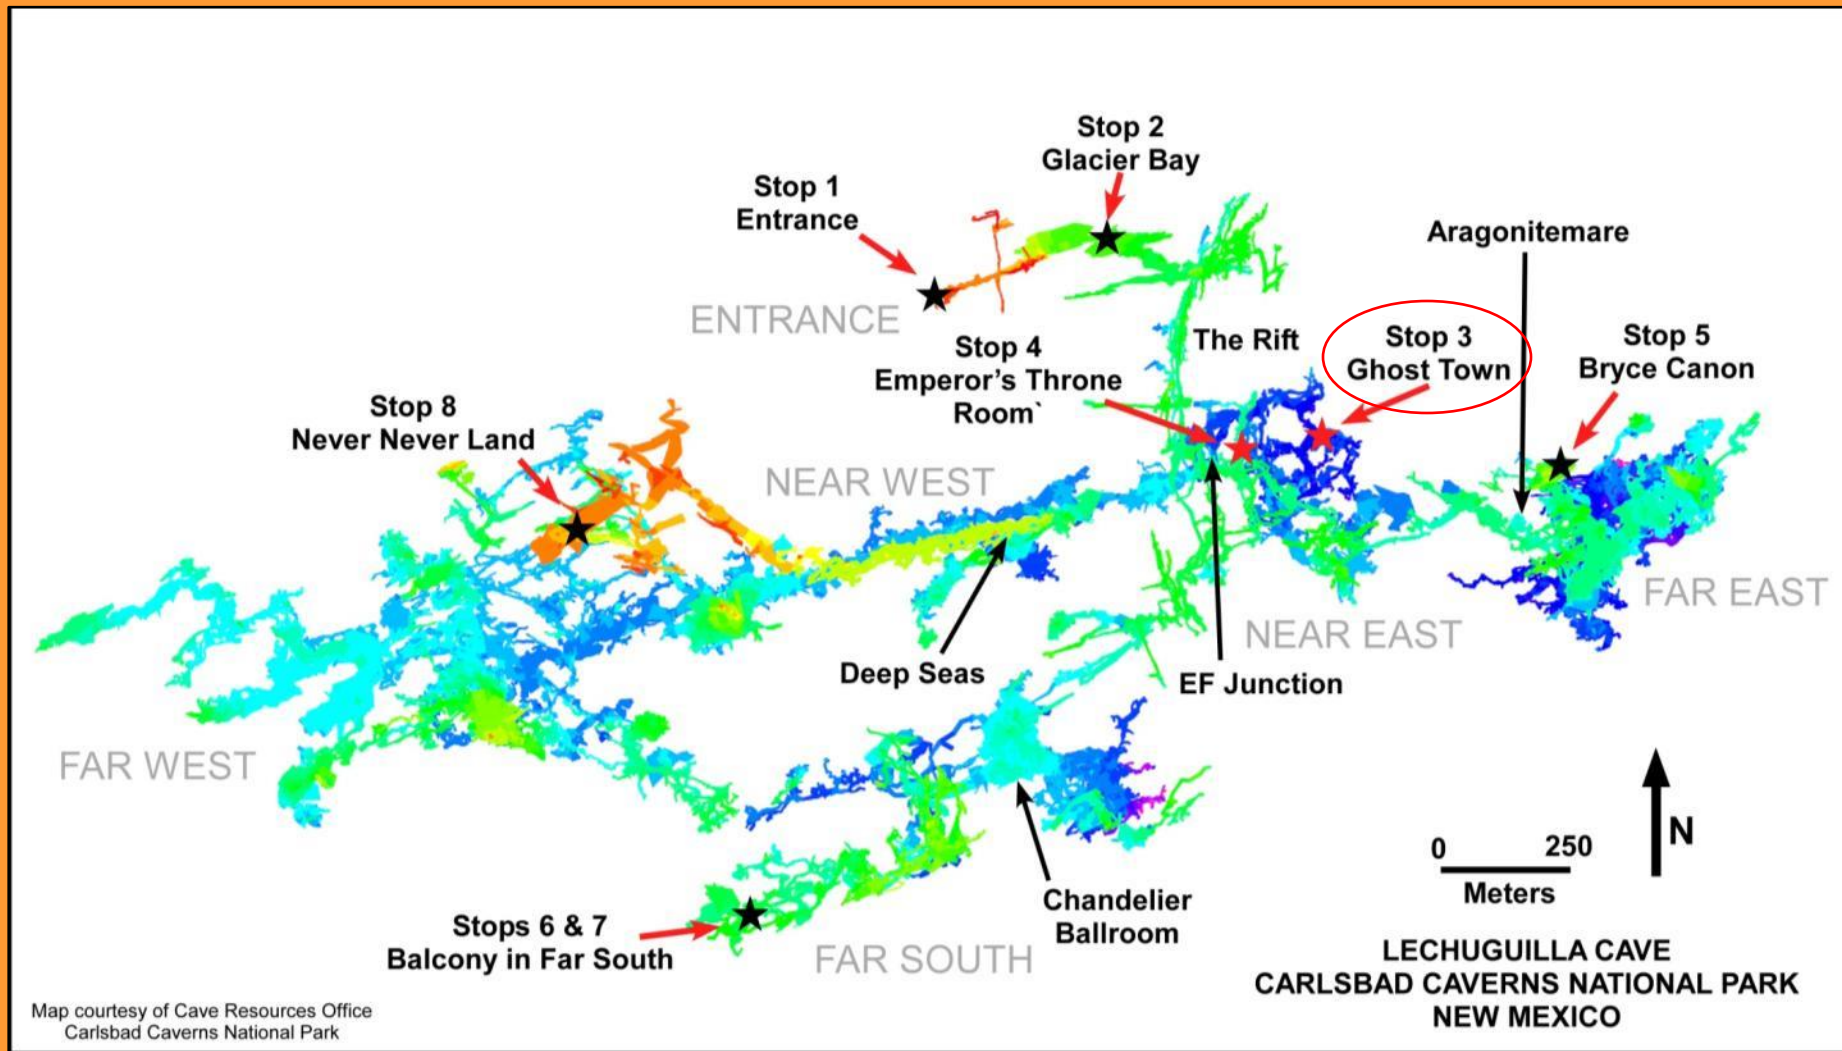

## Stop 4.3: Ghost Town Sulfur and gypsum

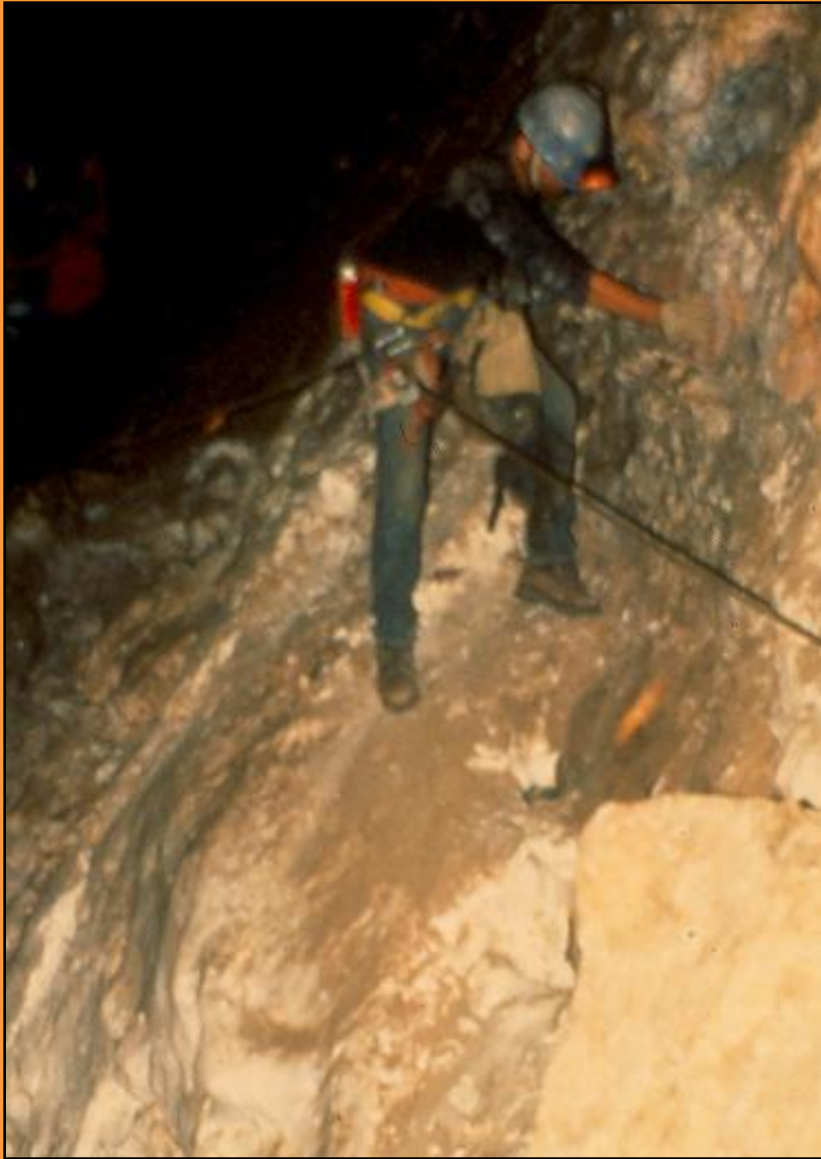

**Traversing a narrow ledge above a 50 m drop in The Overpass part of The Rift on the way to EF Junction where routes to all known parts of the cave converge.**

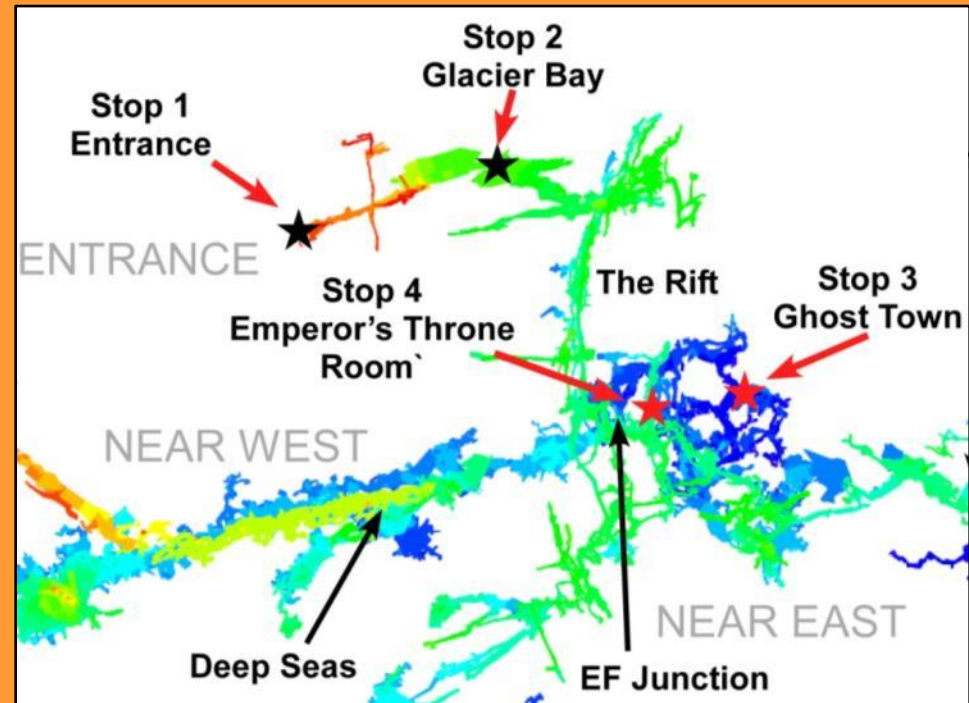

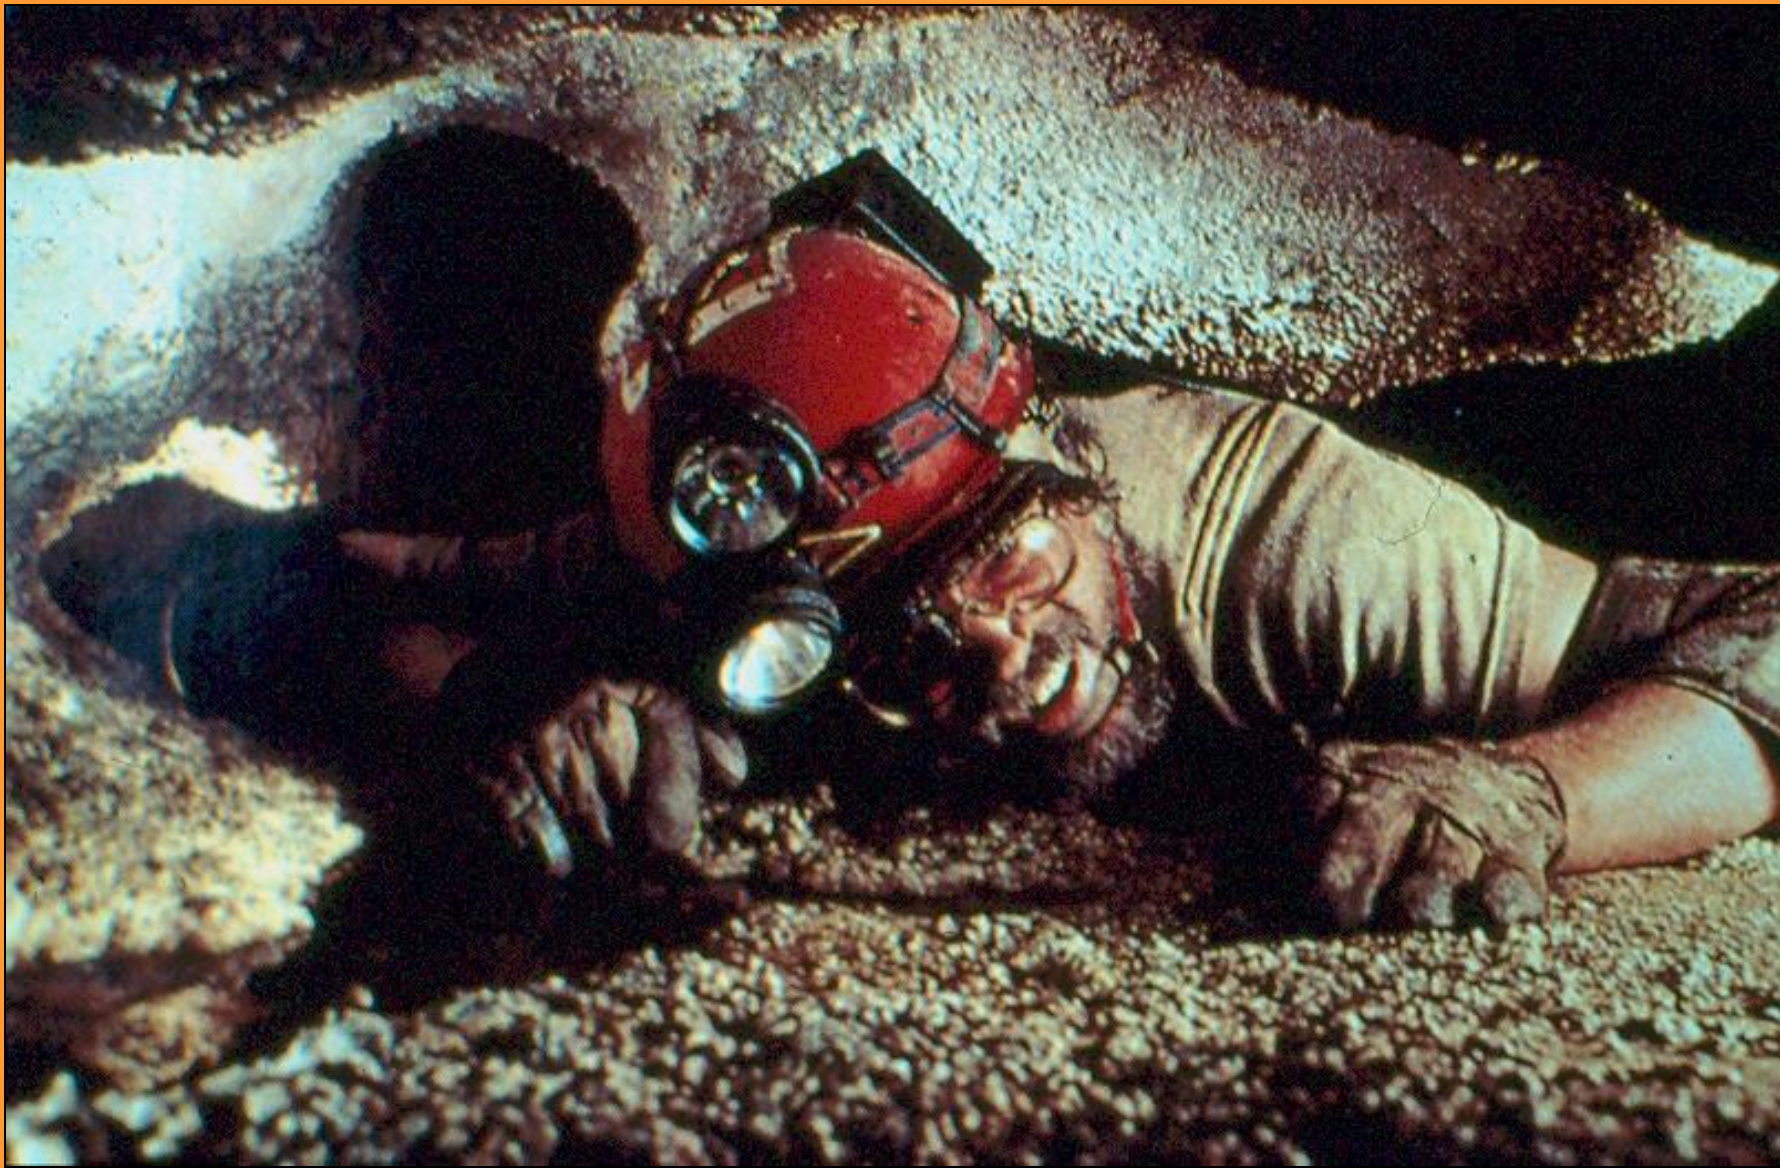

**Negotiating a 24 cm high constriction in the S&M Crawl on the way  
to Ghost Town**

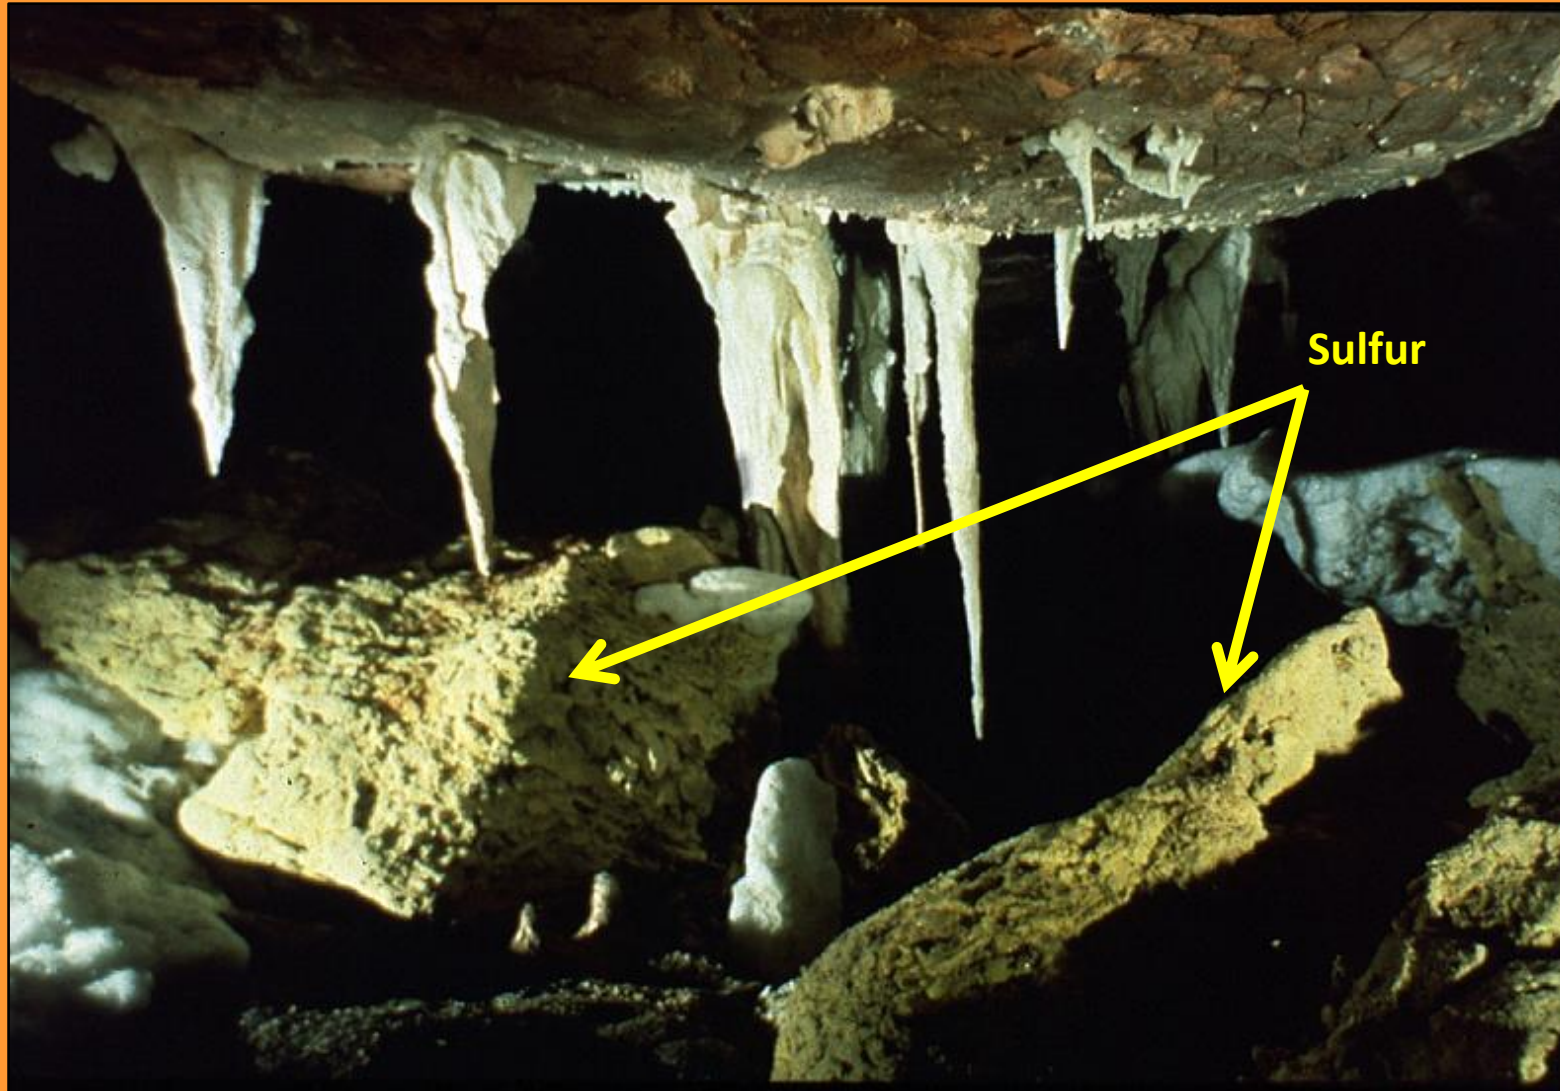

**Massive sulfur and gypsum, GDVB Passage, Ghost Town, Lechuguilla Cave.  
Ceiling bedrock is a siltstone bed.**

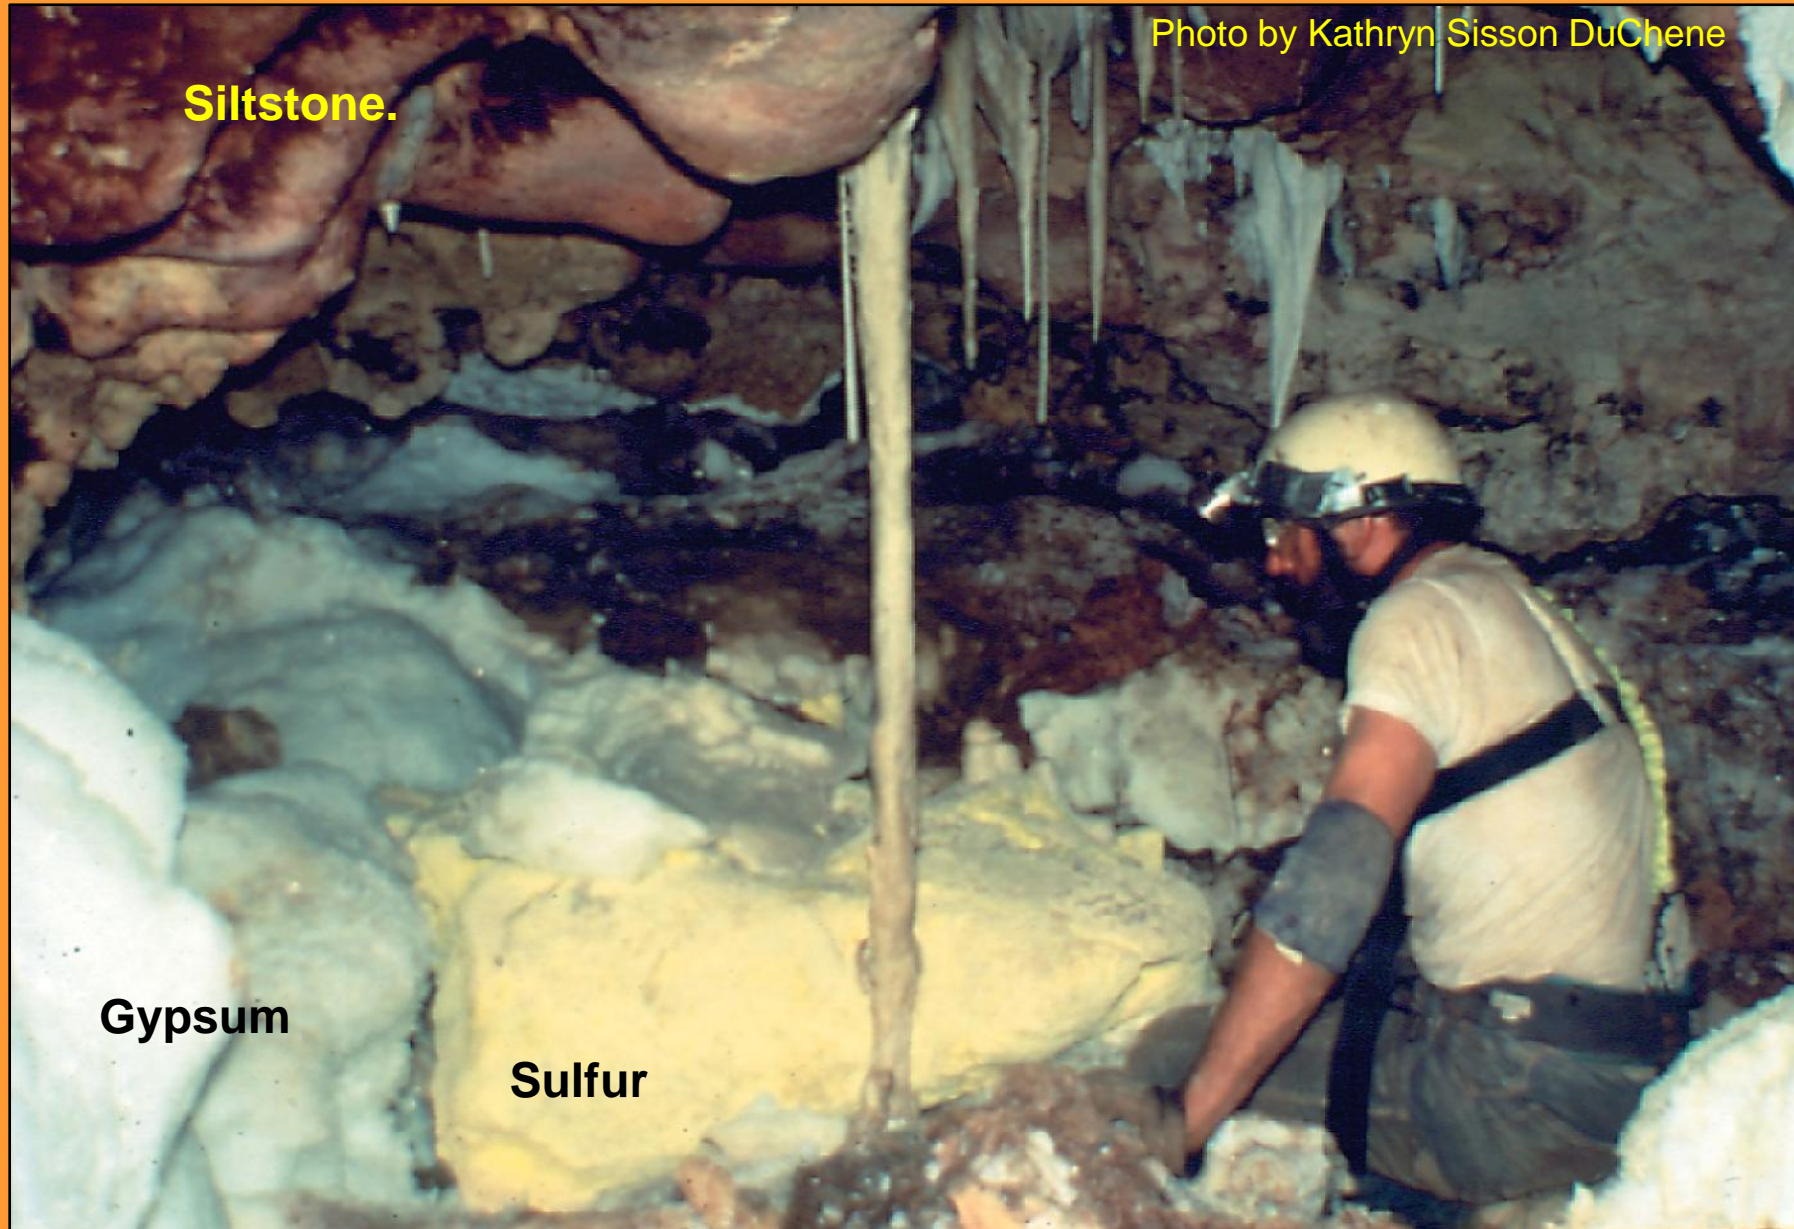

Photo by Kathryn Sisson DuChene

**Siltstone.**

**Gypsum**

**Sulfur**

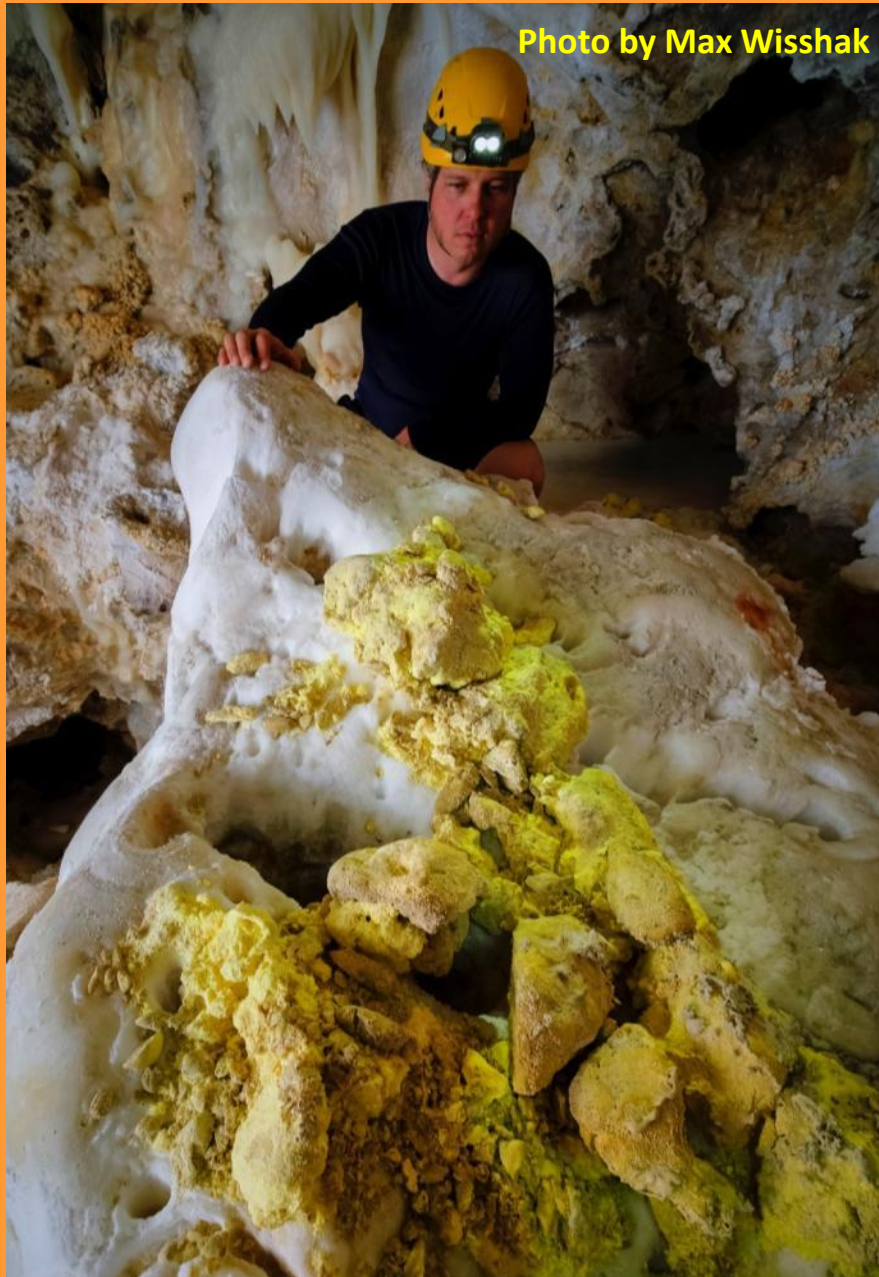

**Sulfur in gypsum.  
Barite Boulevard near Blanca  
Navidad Hall**

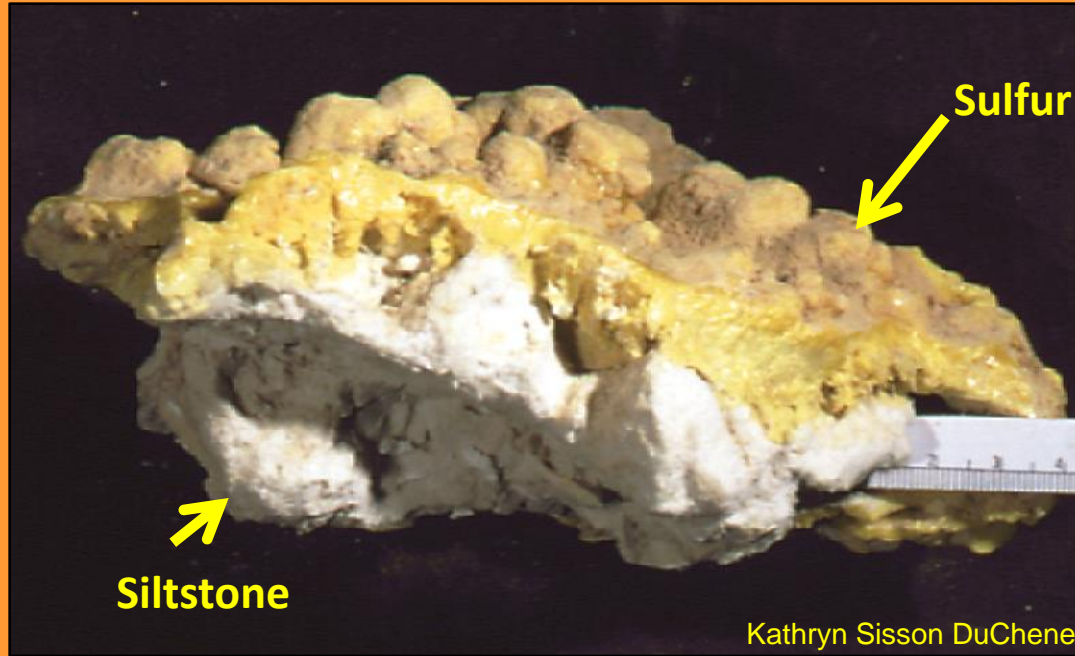

**Sulfur on siltstone, The Void, Lechuguilla Cave.**

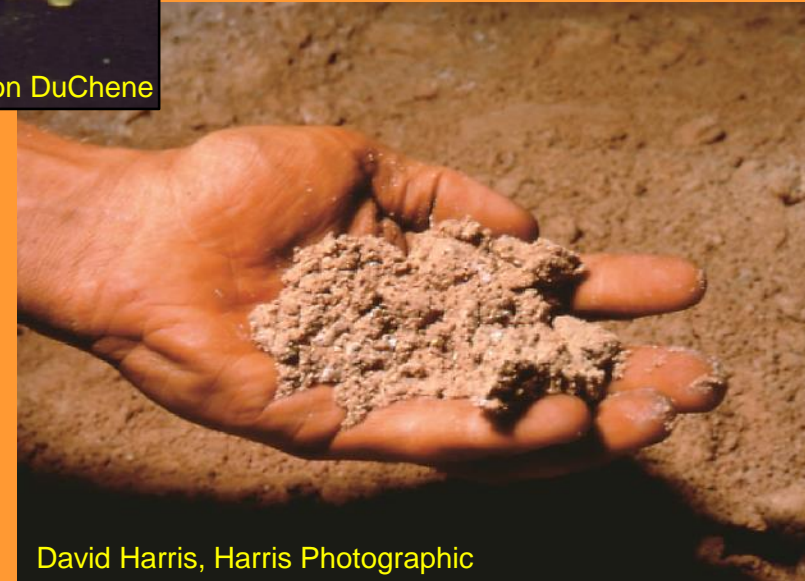

**Unconsolidated silt, The Void**

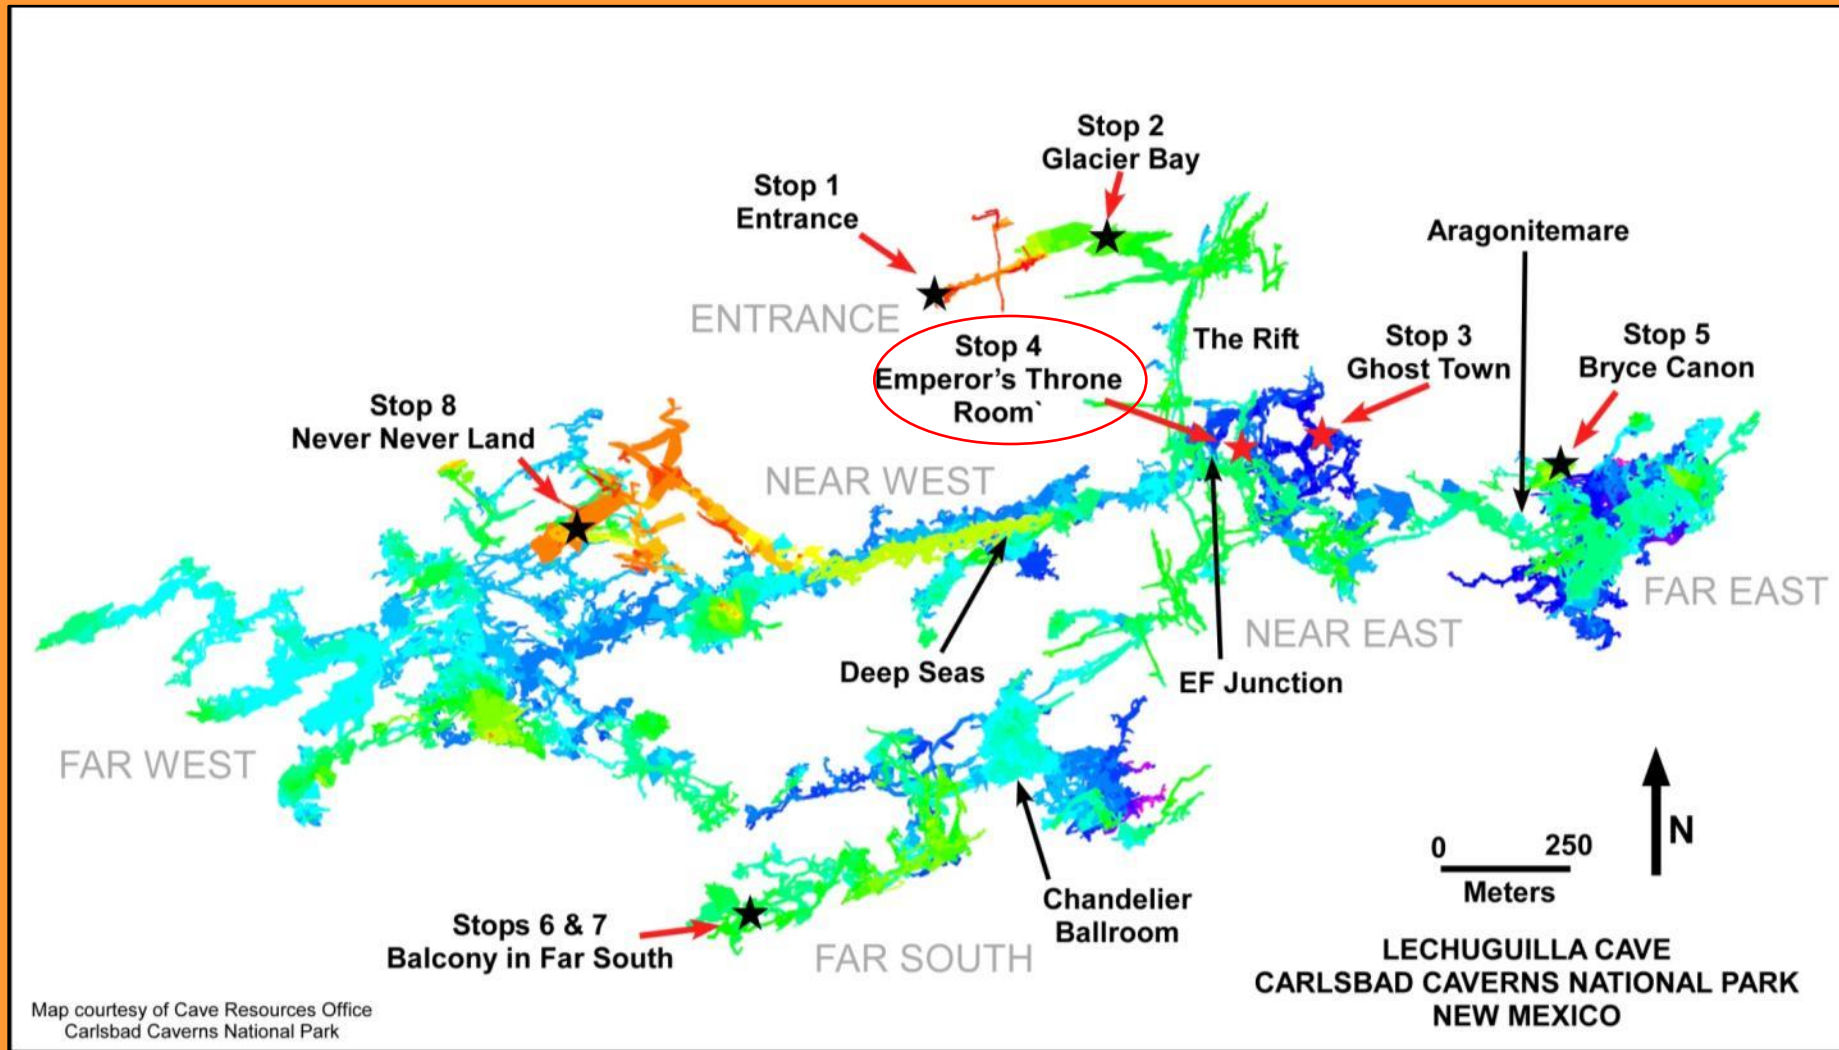

## Stop 4.4: Emperor's Throne Room Acid pool basin

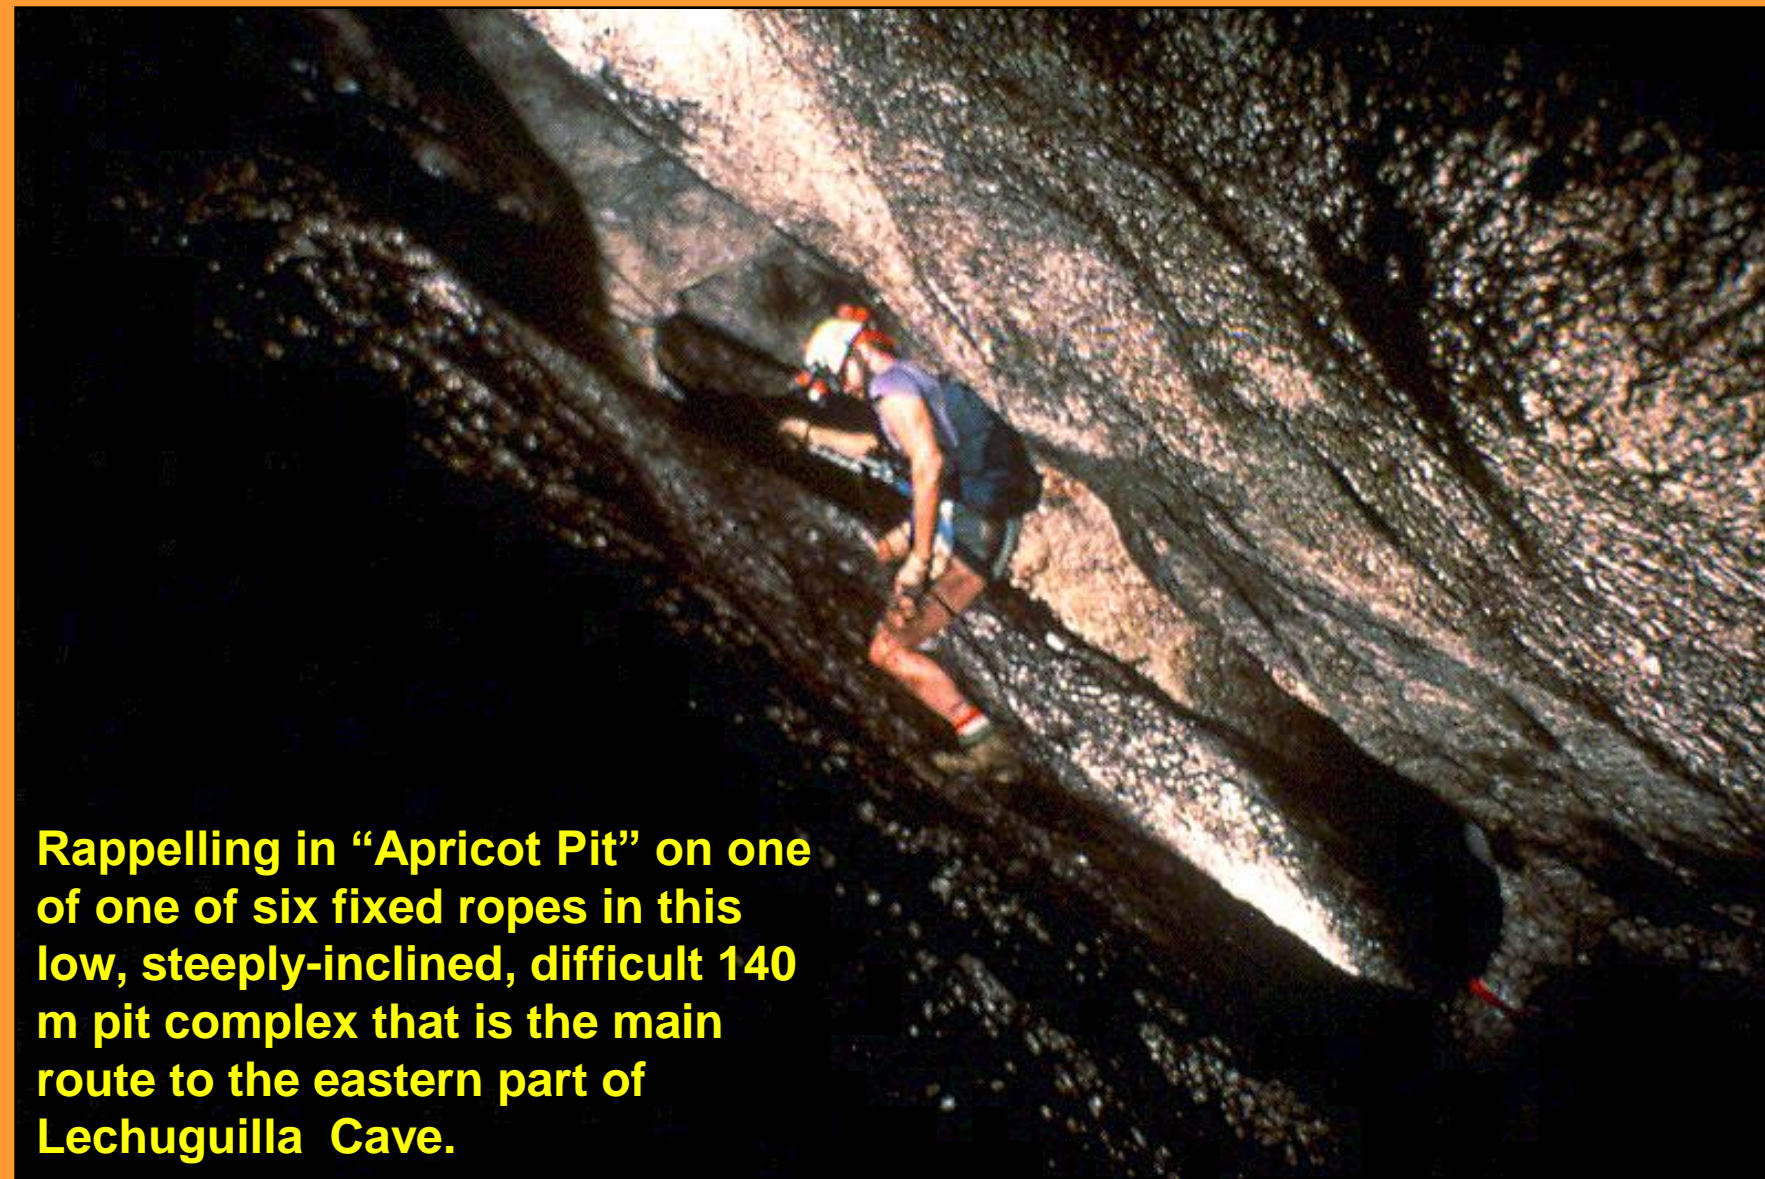

**Rappelling in “Apricot Pit” on one of one of six fixed ropes in this low, steeply-inclined, difficult 140 m pit complex that is the main route to the eastern part of Lechuguilla Cave.**

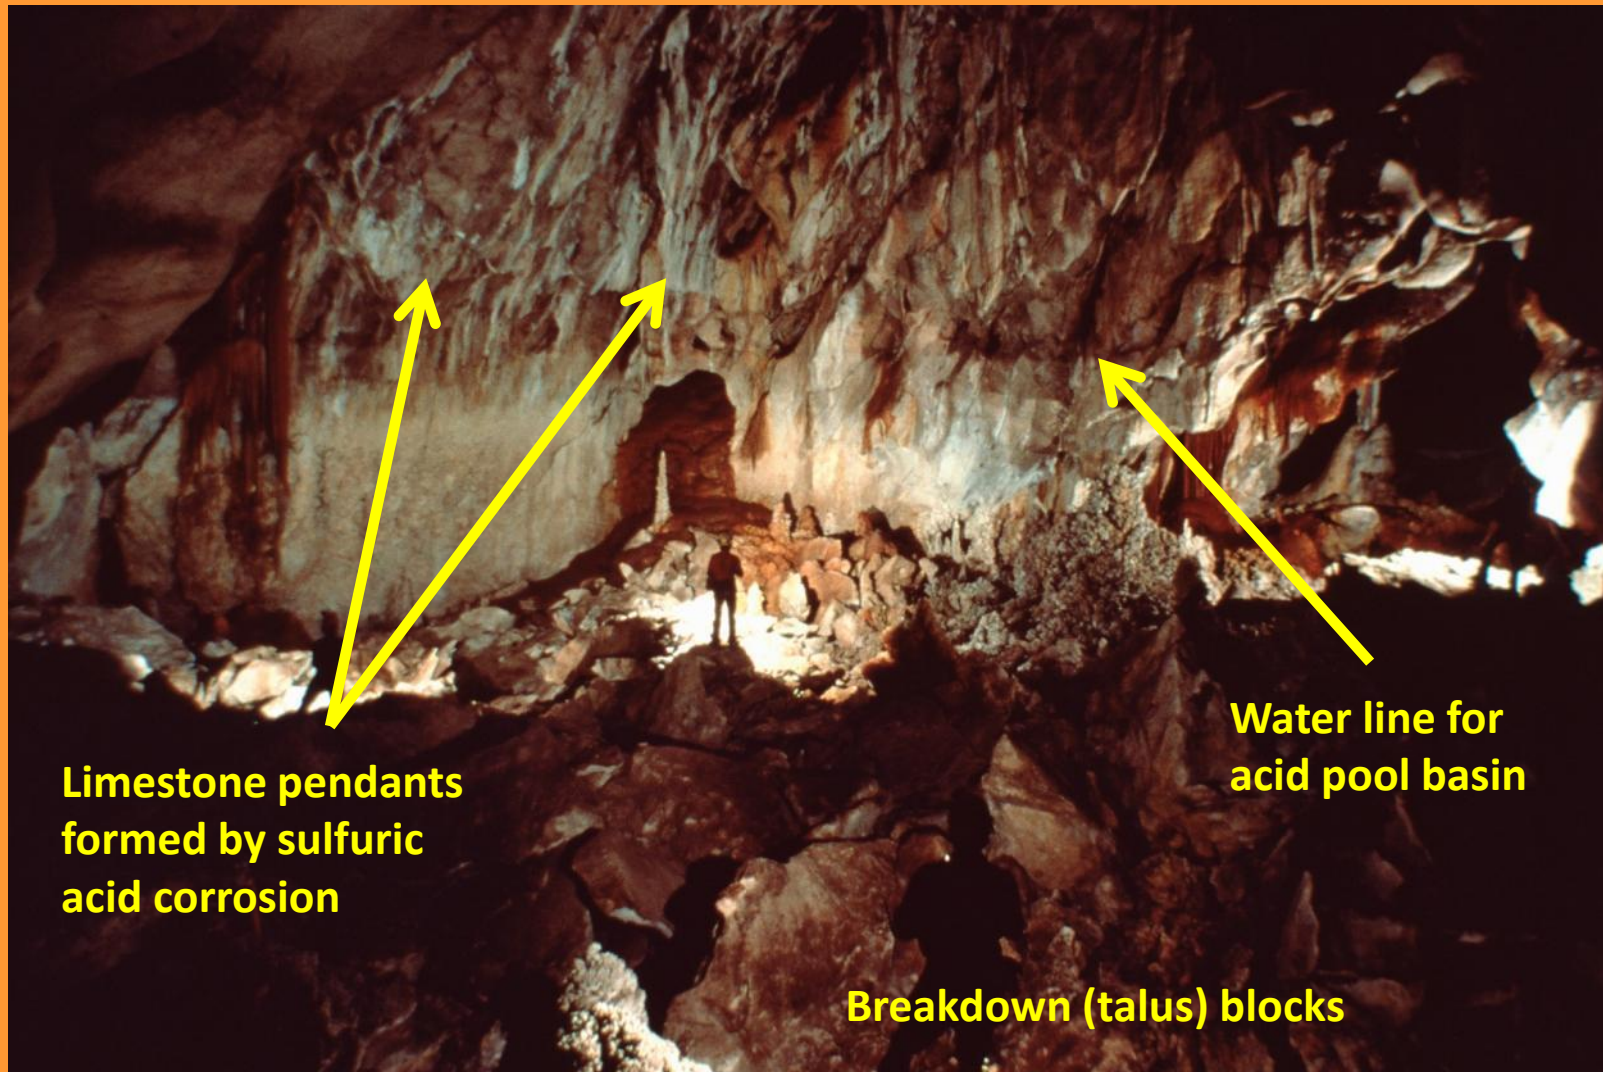

**Condensation-corrosion pendants, acid pool basin water line and breakdown (talus) floor, Emperor's Throne room, Near East, Lechuguilla**

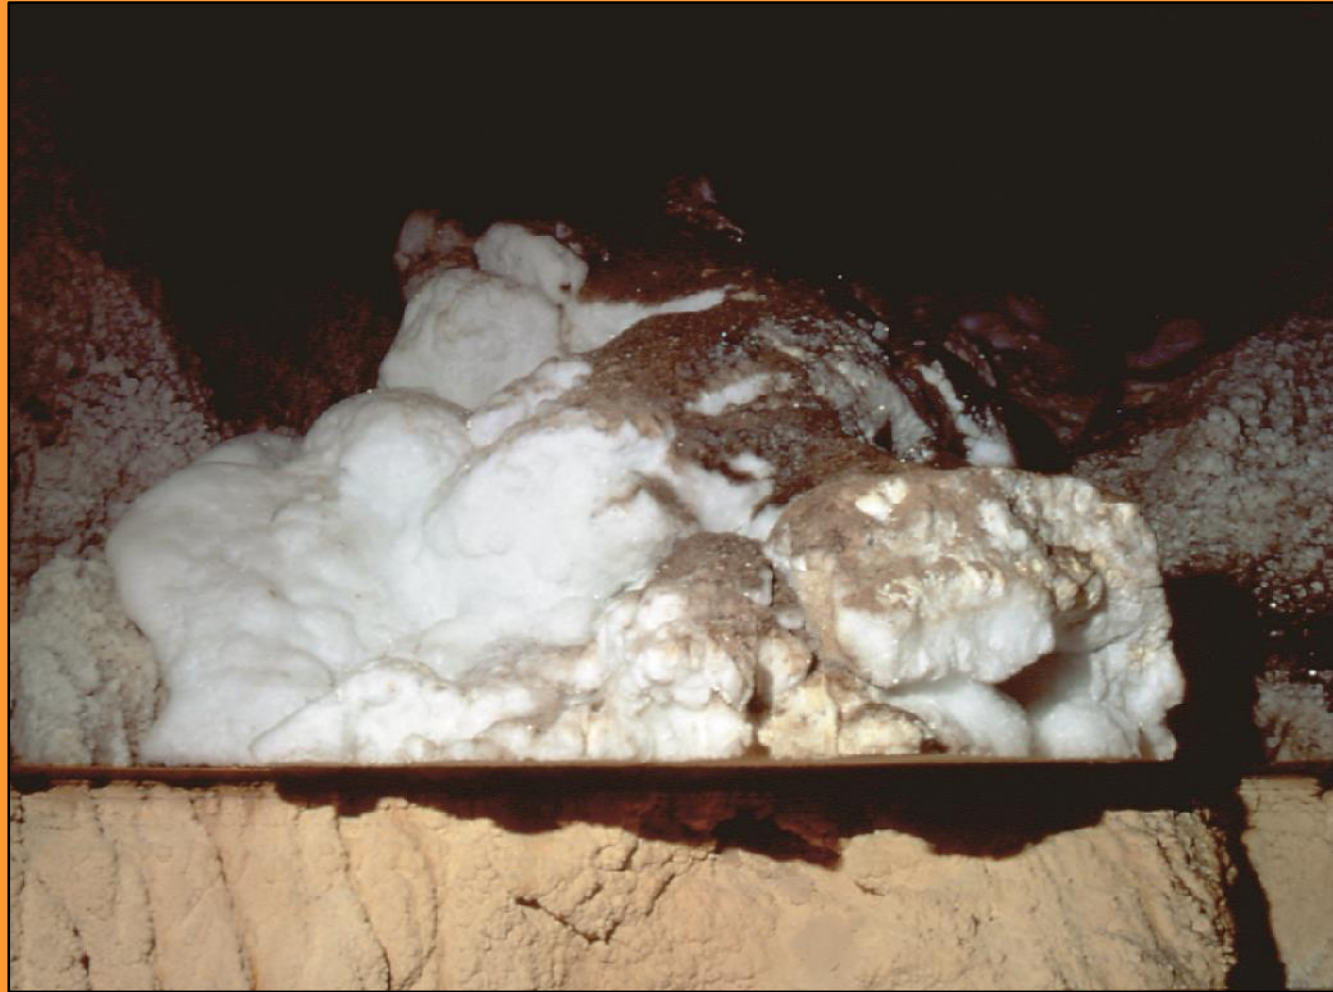

**Sharp water line with speleogenetic gypsum above and none below.**

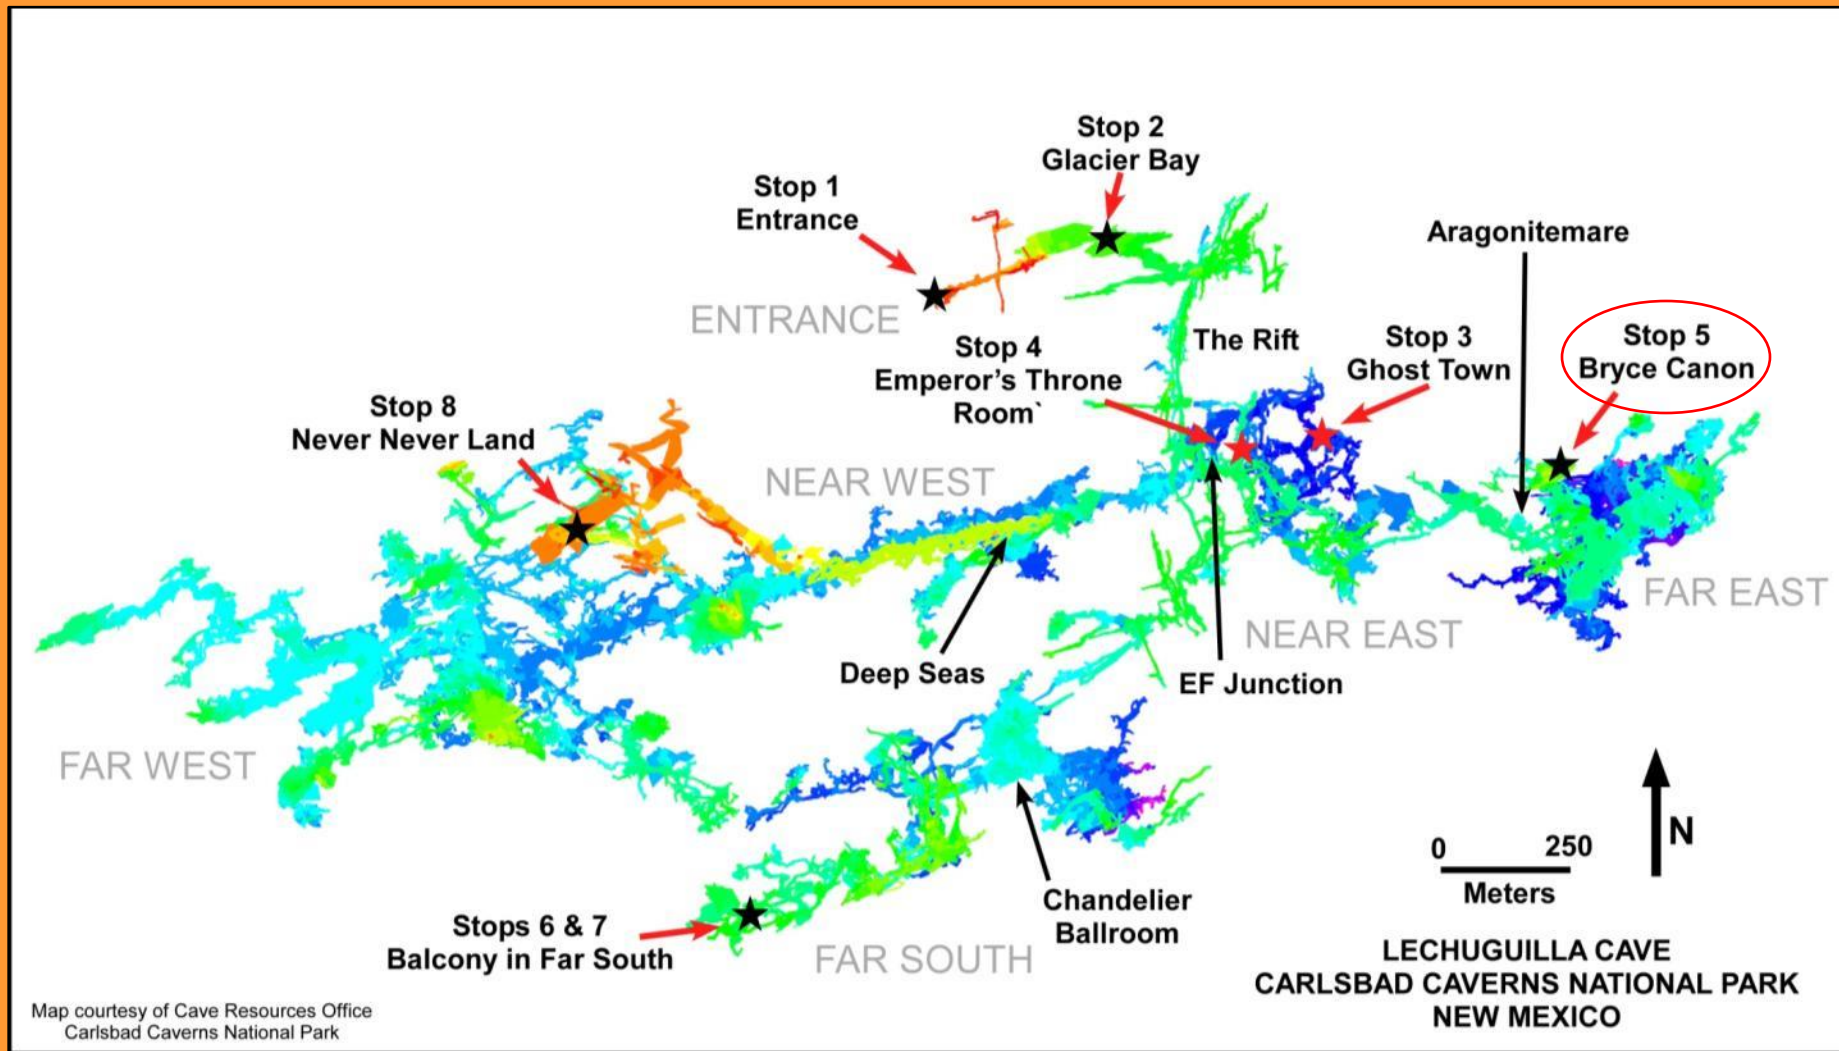

## Stop 4.5: Bryce Canyon, Far East. Acid pool basin and rills

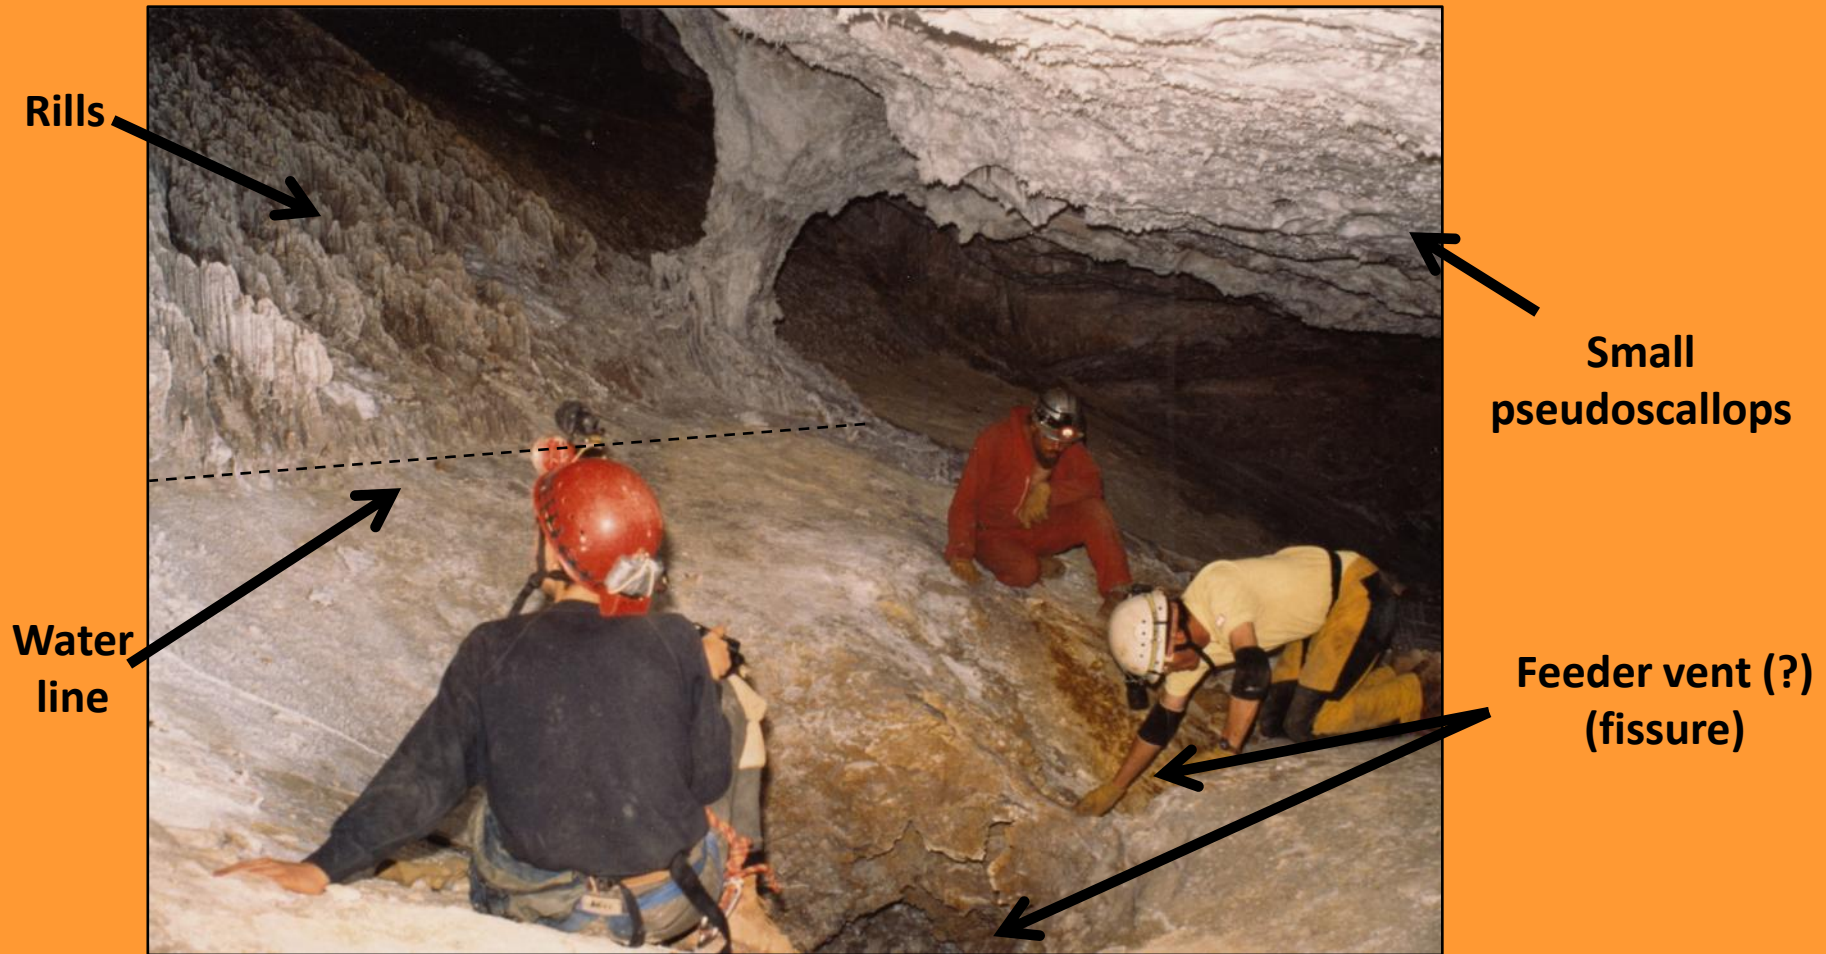

## Acid Pool Basin – Far East, Lechuguilla

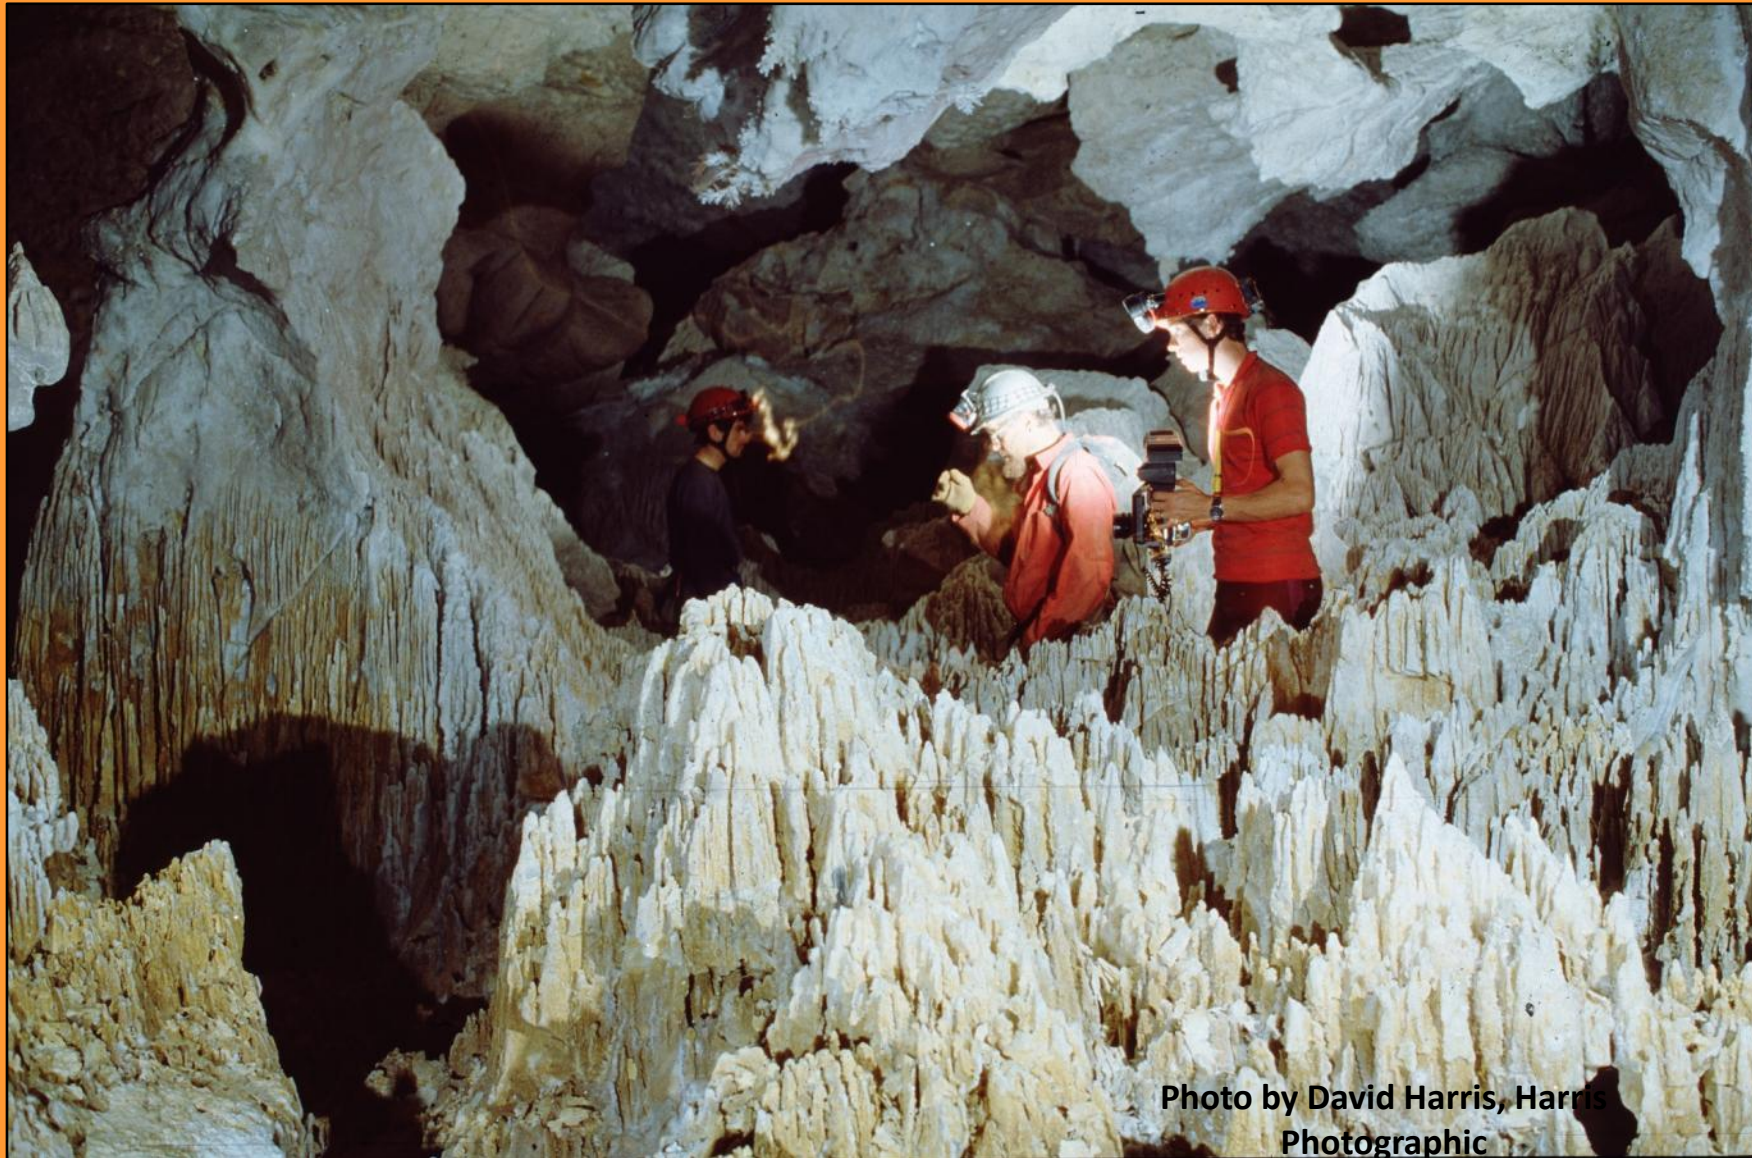

Photo by David Harris, Harris  
Photographic

**Exceptional display of corroded bedrock, Bryce Canyon, Far East, Lechuguilla Cave**

*Hypogenic Caves of the Great Basin: Chapter 4, Lechuguilla Cave*

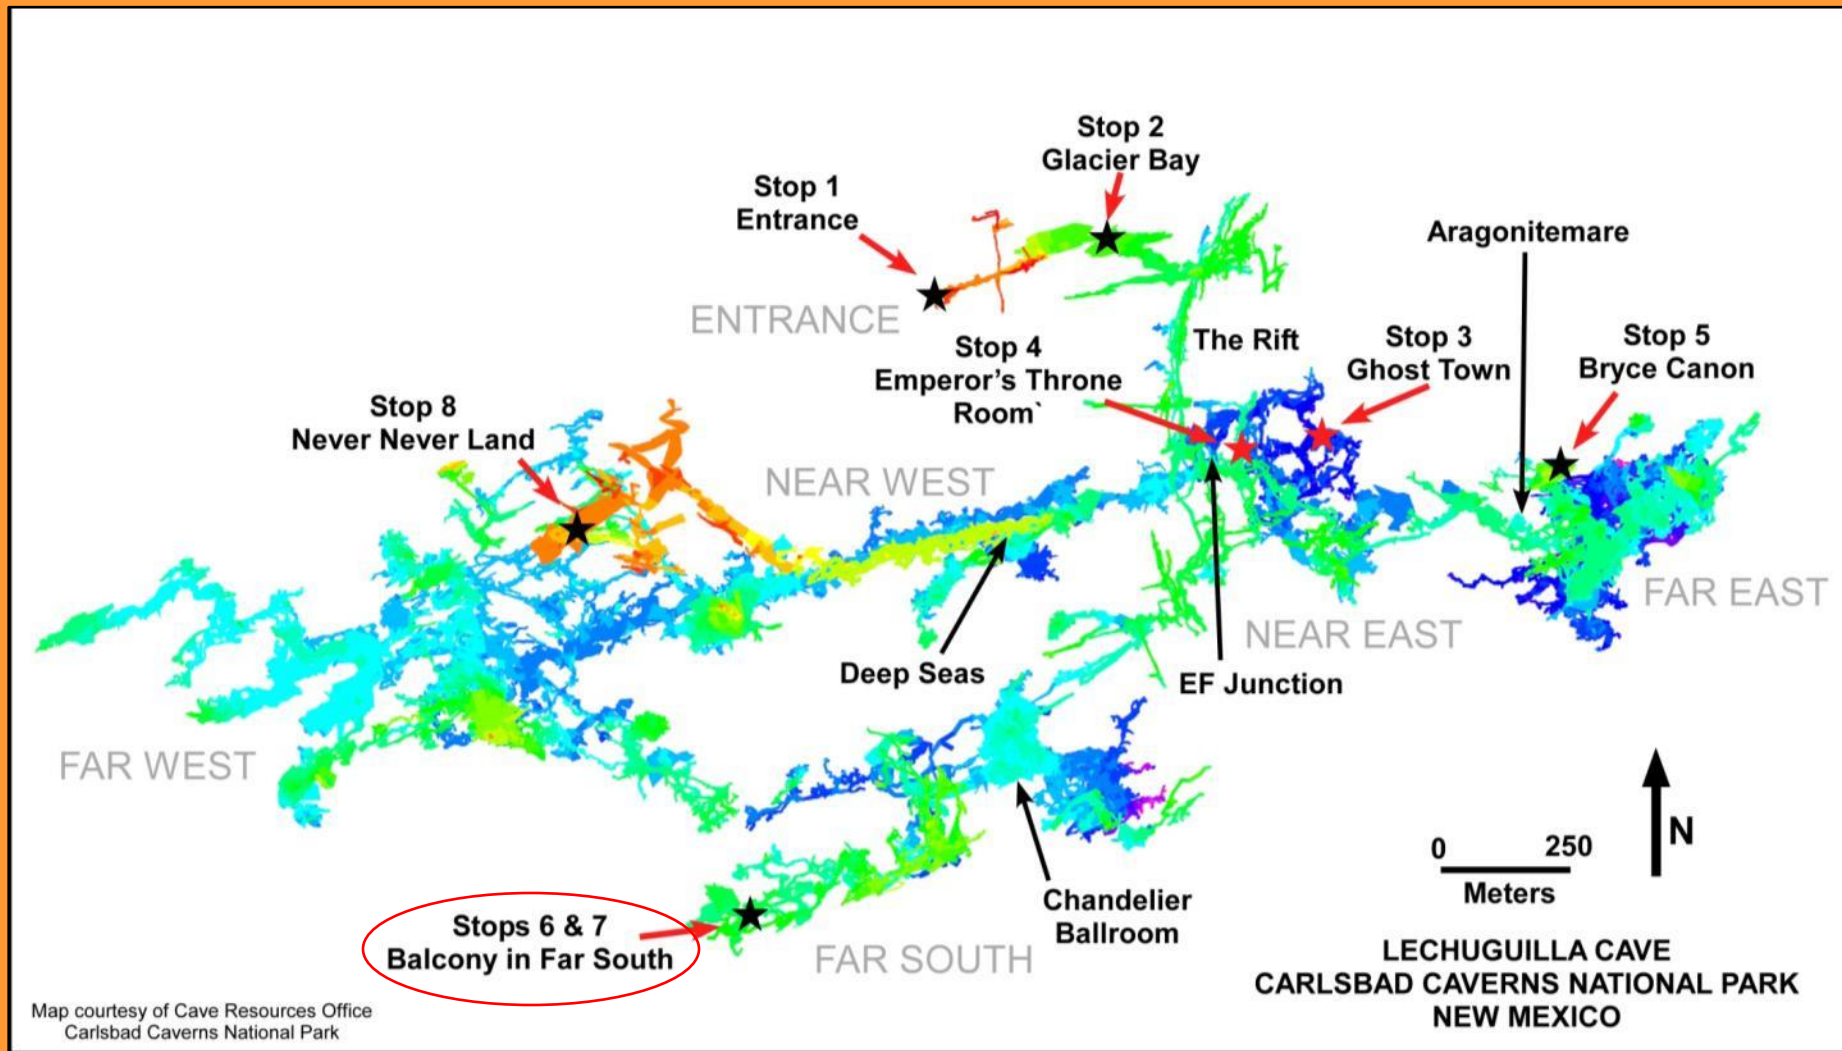

## Stop 4.6 & 4.7: Balcony, Far South Drip tubes and metatyuyamunite

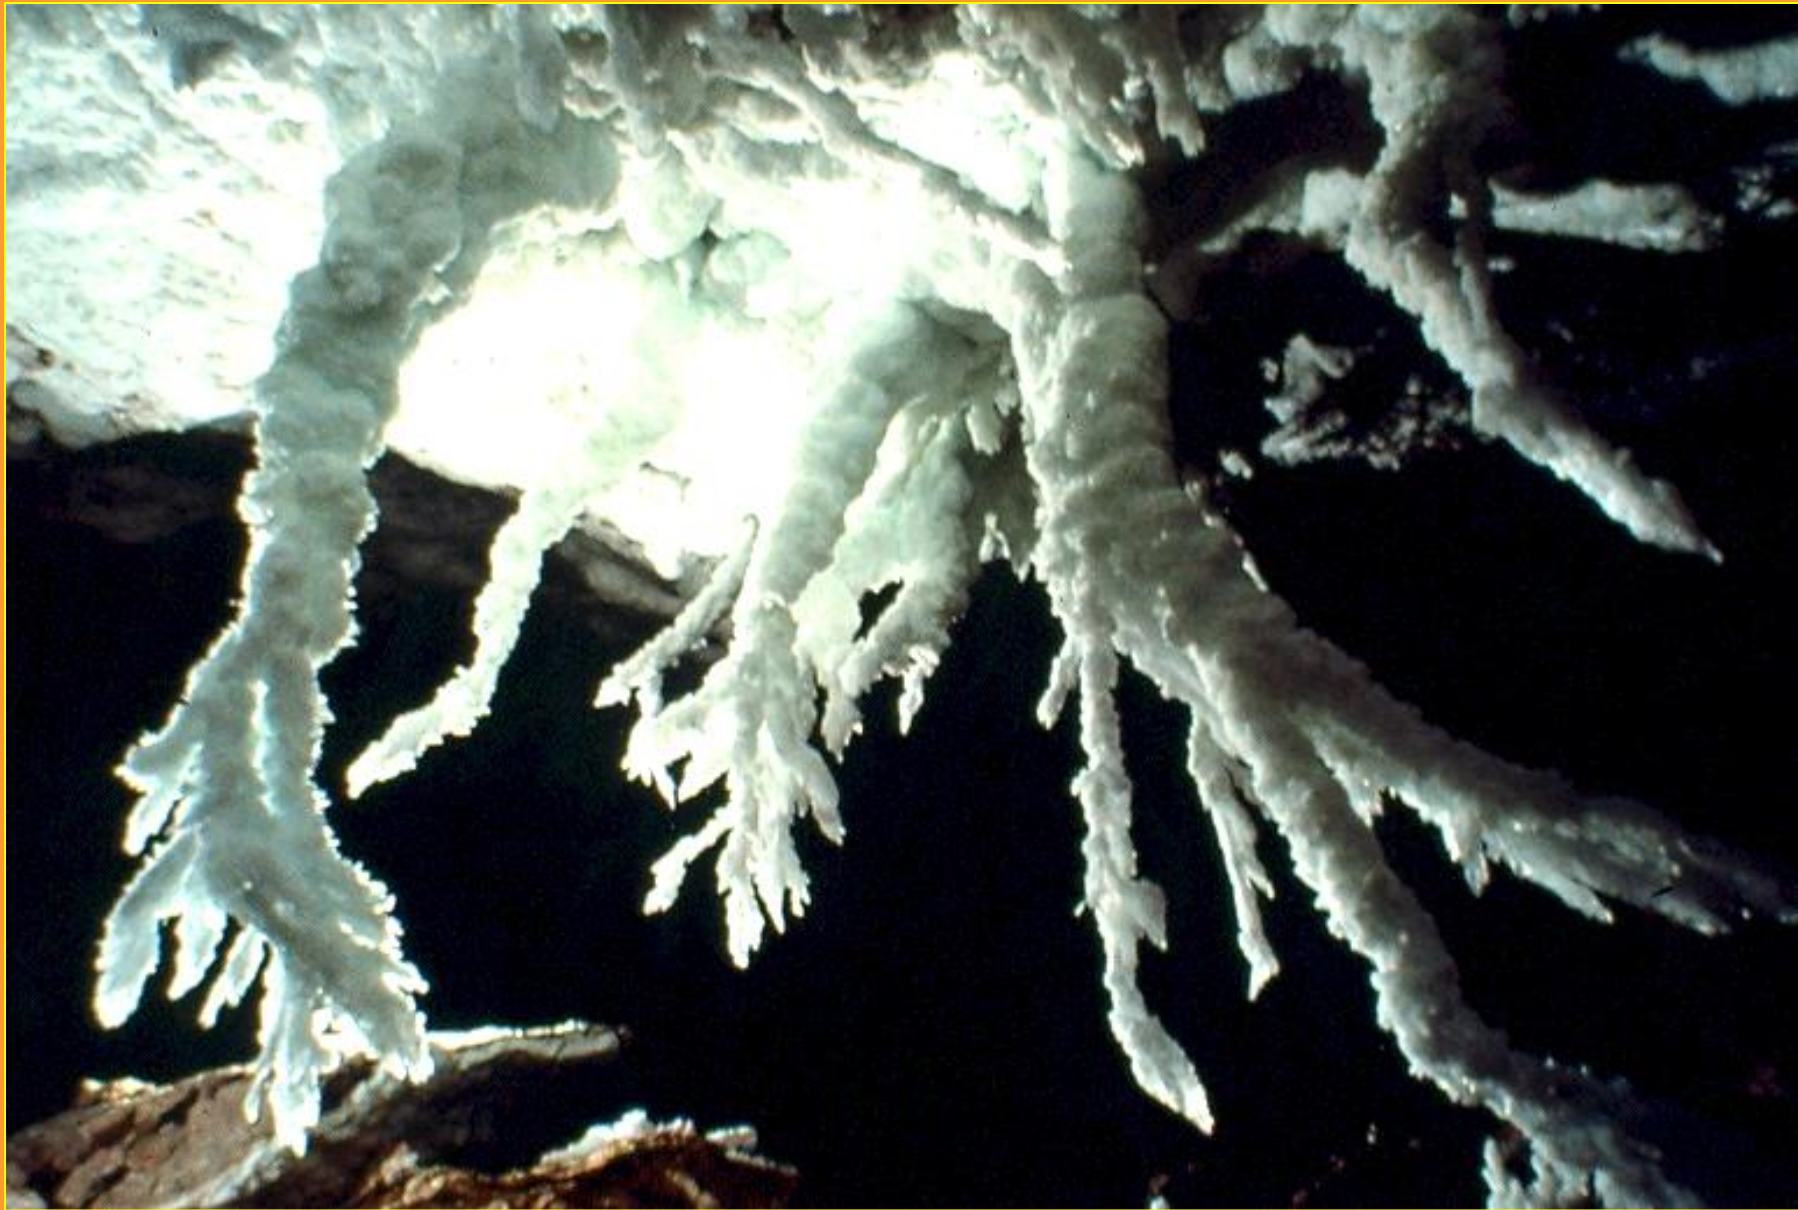

**Gypsum chandeliers, Chandelier Ballroom.**

Photo by David Harris,  
Harris Photographic

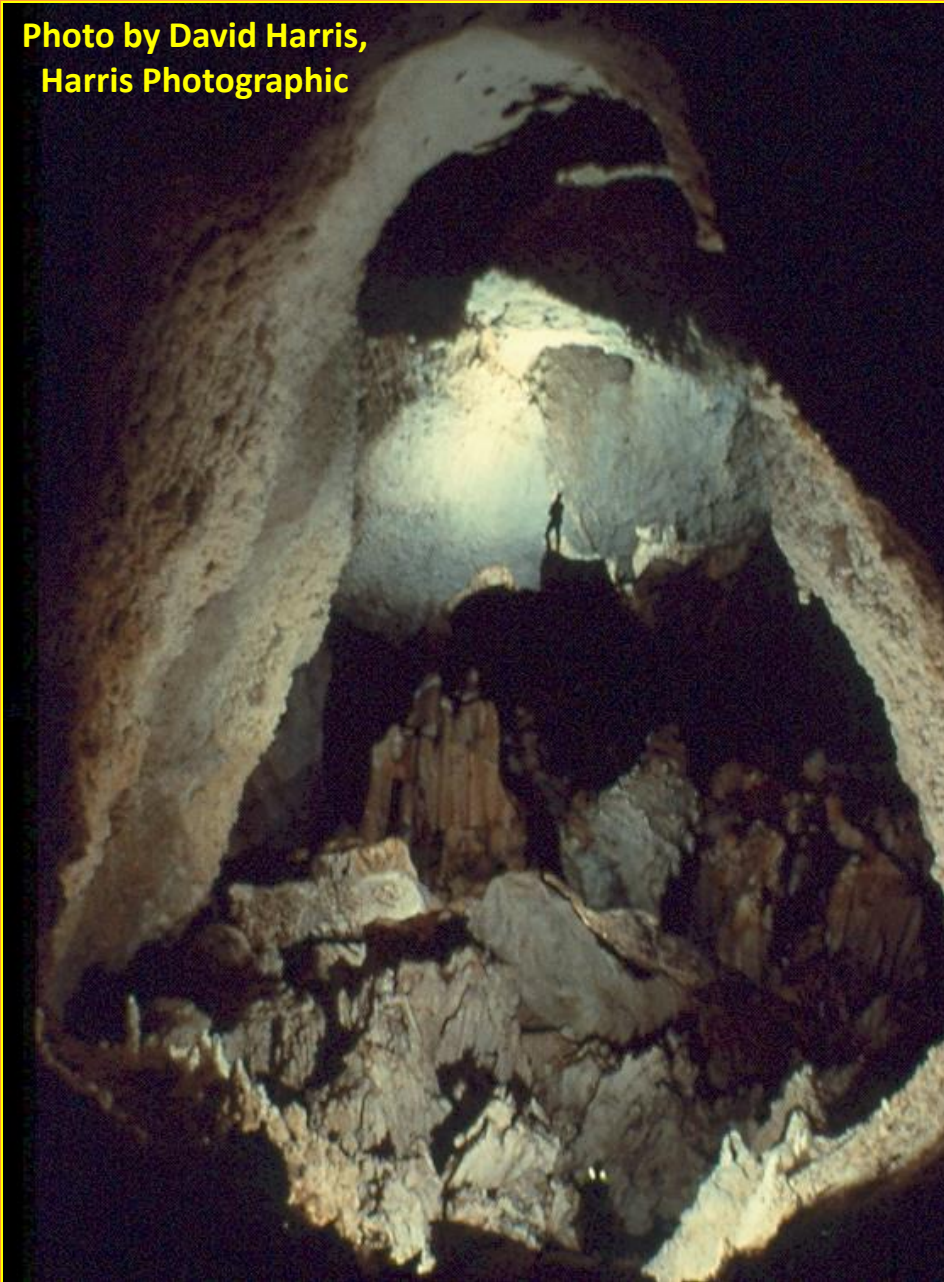

**West end of the Prickly Ice Cube Room, a huge chamber beyond the Chandelier Ballroom. The large blocks on the floor are gypsum. Note cavers at bottom center and in upper center of photo for scale.**

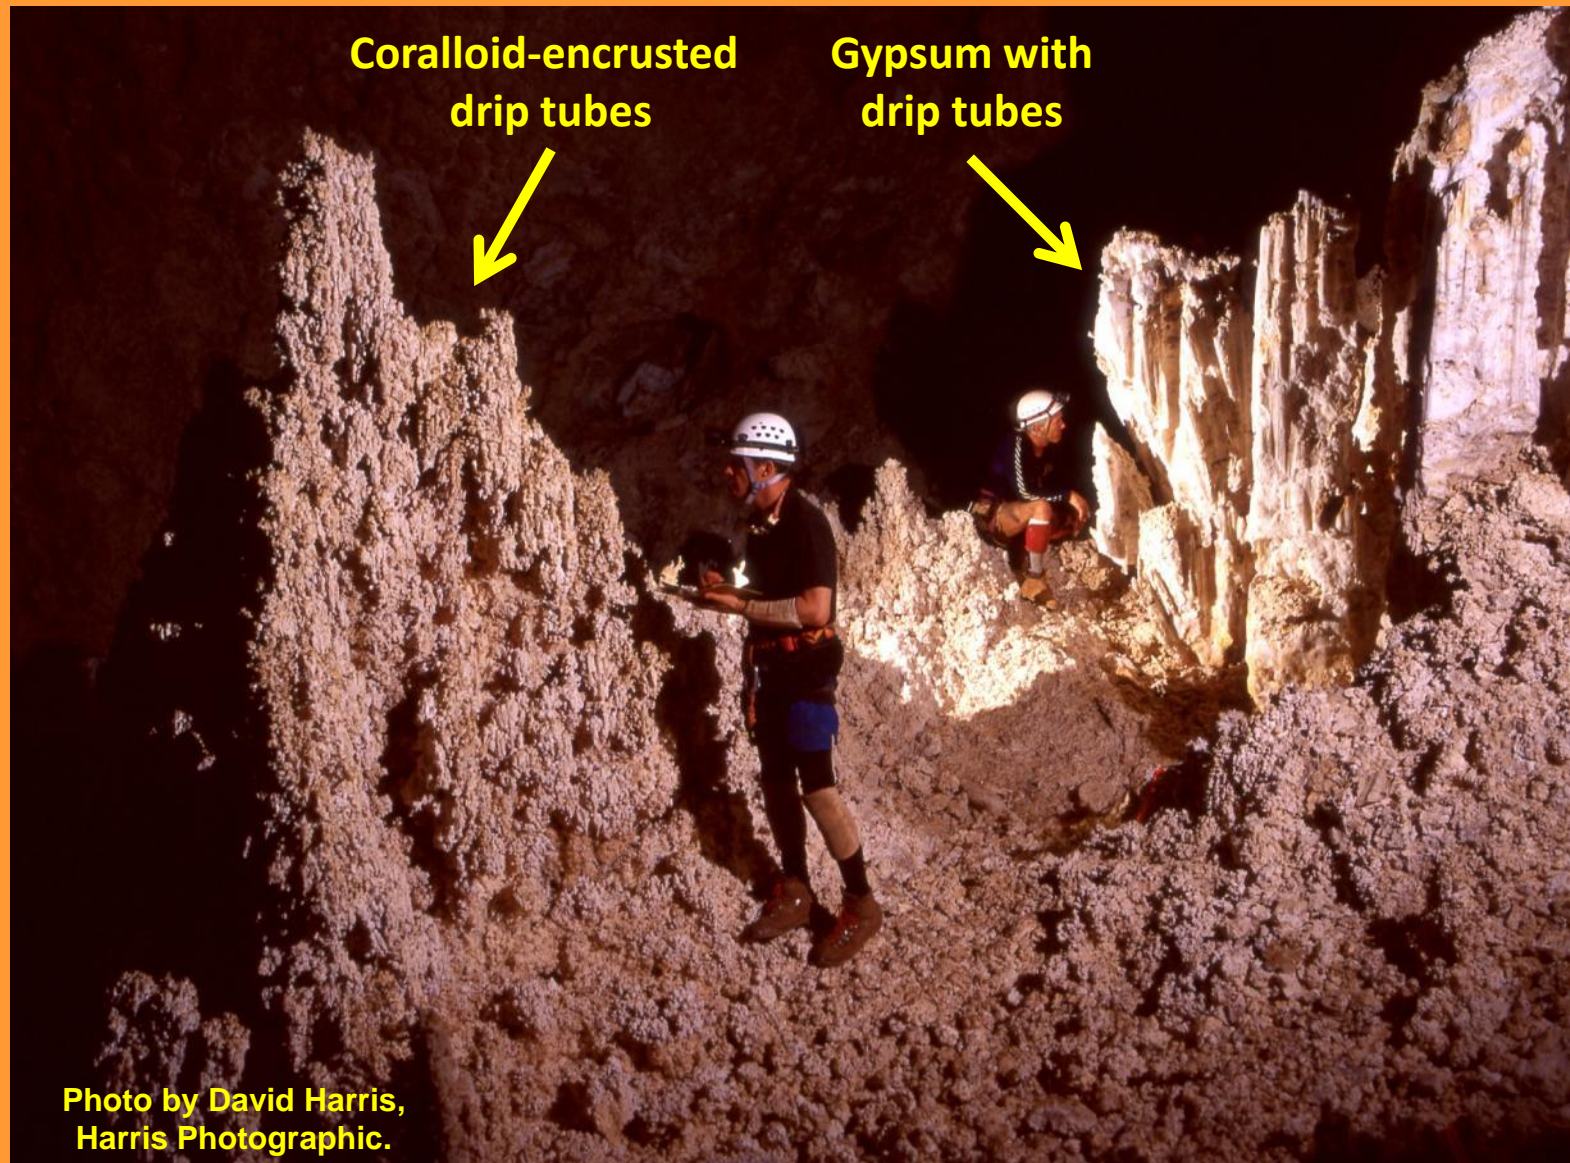

Photos by David Harris,  
Harris Photographic.

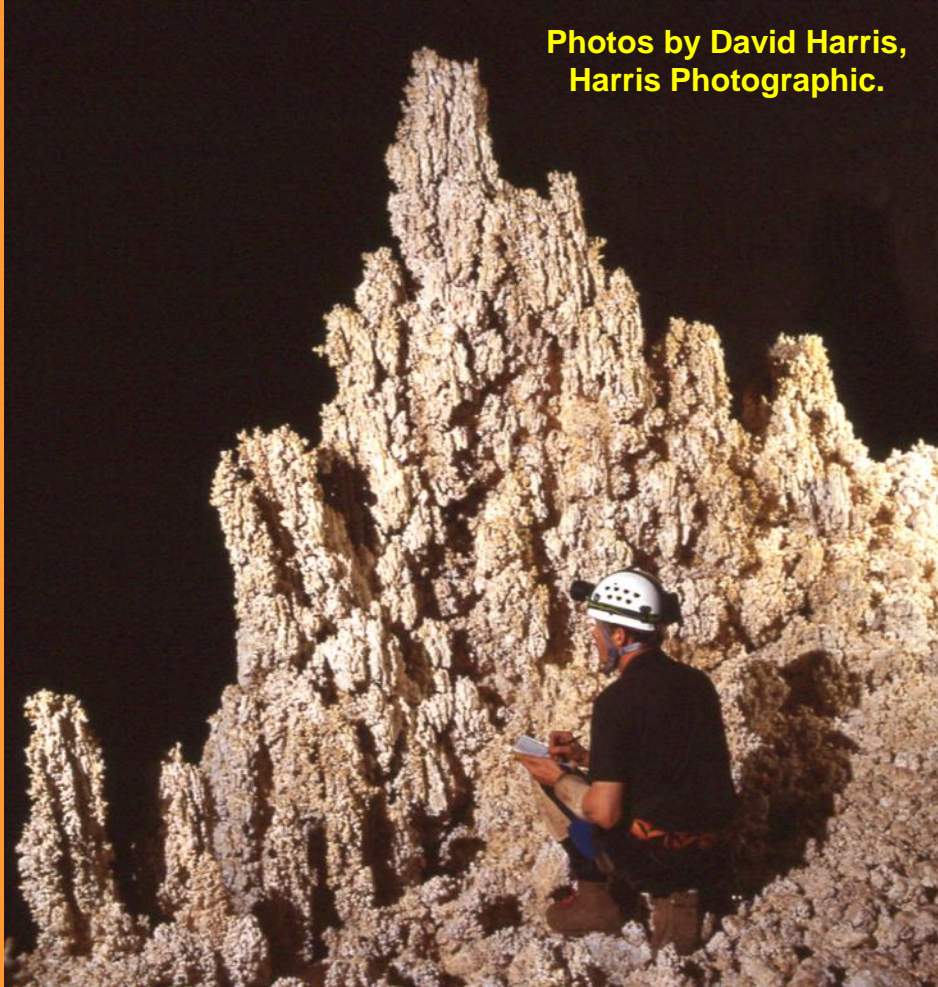

**Coralloid-encrusted drip holes.**

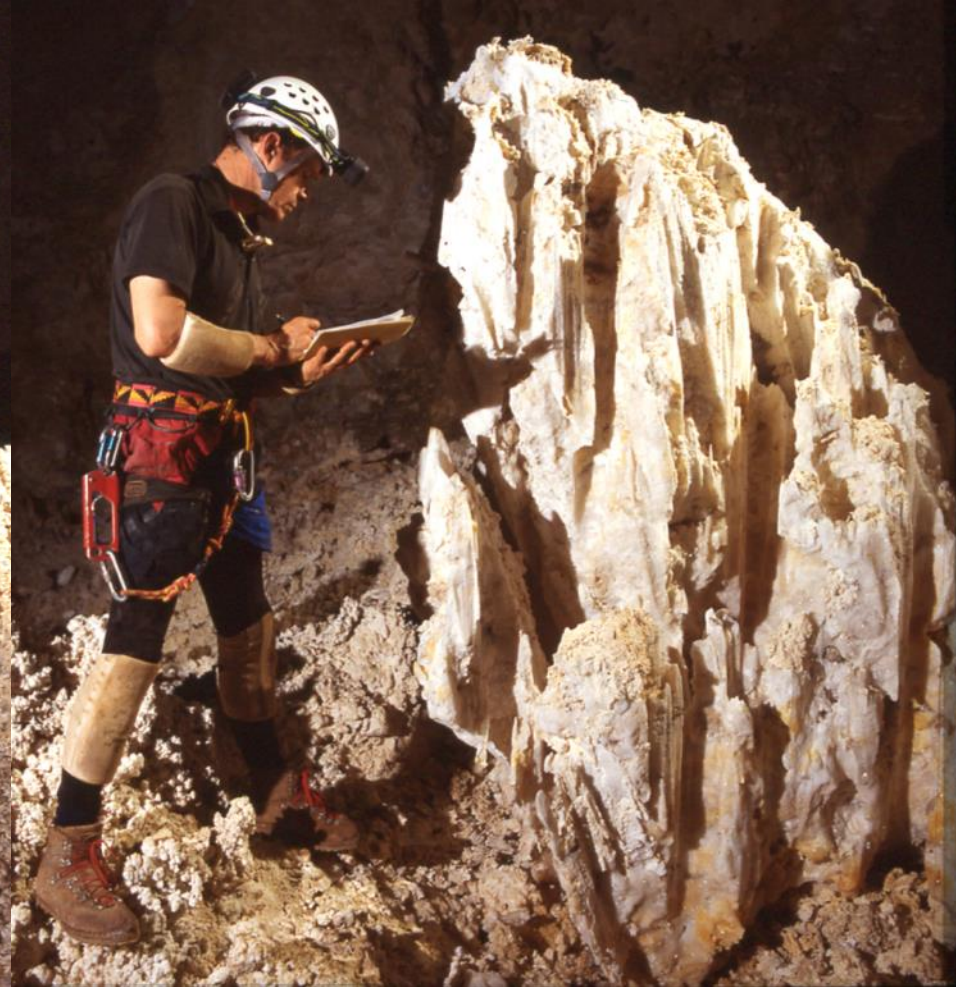

**Remnant block of gypsum with  
drip holes**

**Note the drip tube morphology similarity between left and right.**

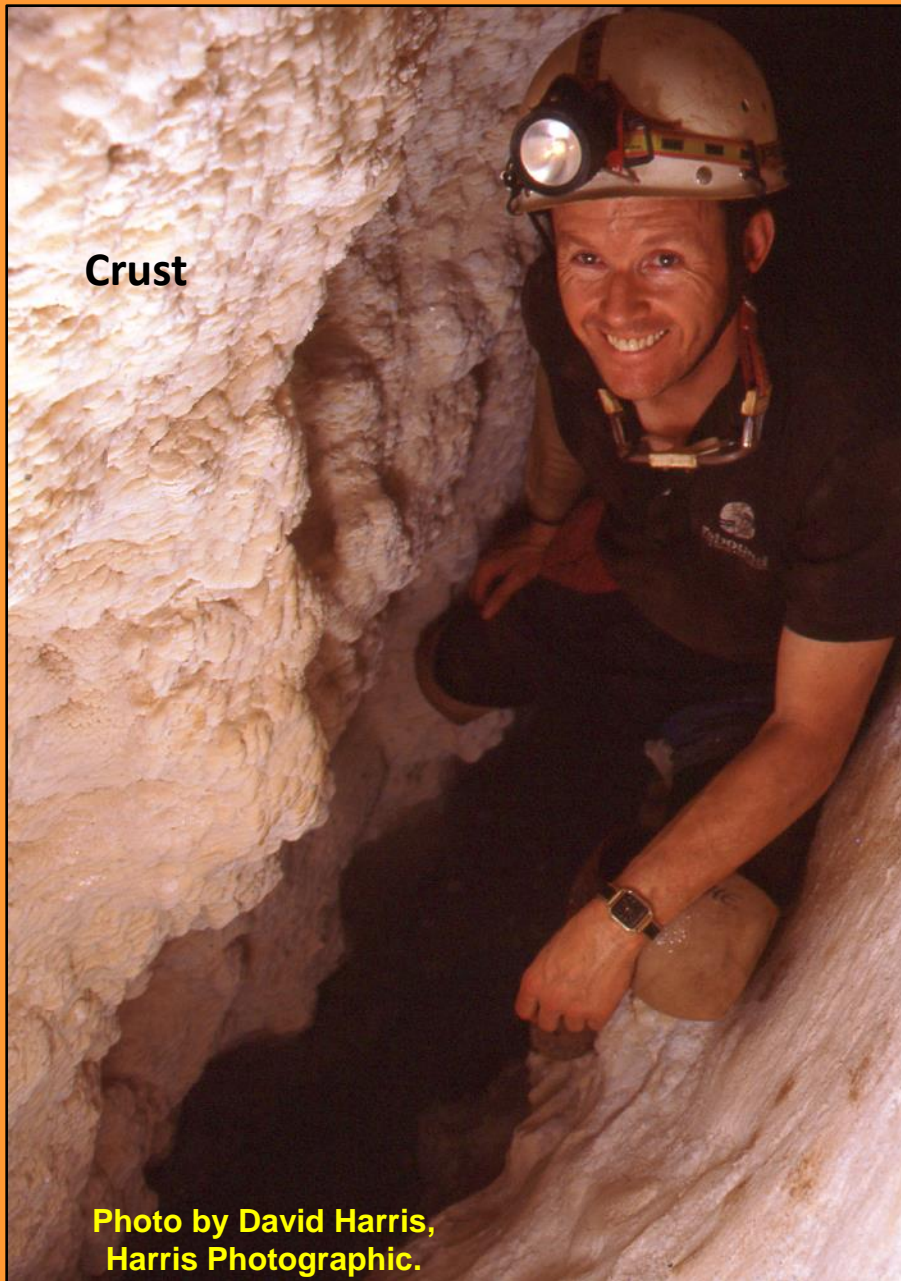

## Crusts:

They can be composed of calcite, hydrocalcite, hydromagnesite, gypsum, and rarely quartz.

They can also contain rarer cave minerals, including fluorite, celestine, tyuyamunite and metatyuyamunite.

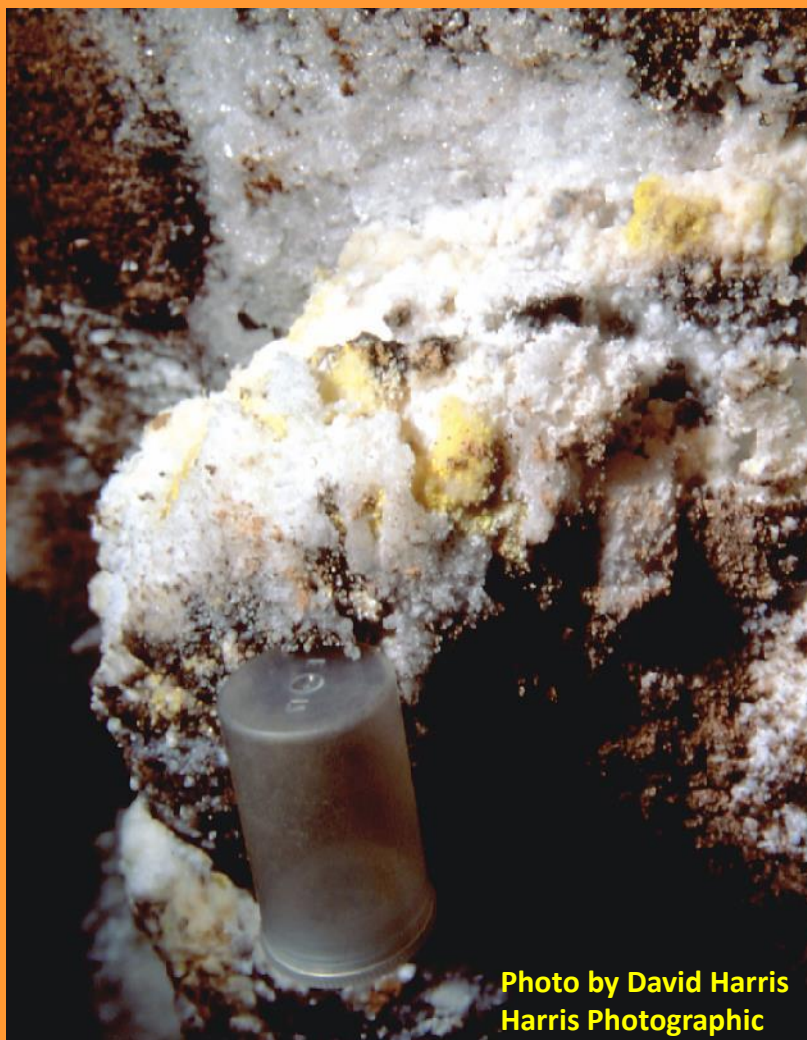

Photo by David Harris  
Harris Photographic

**Tyuyamunite (yellow) on  
quartz in a wall crust.**

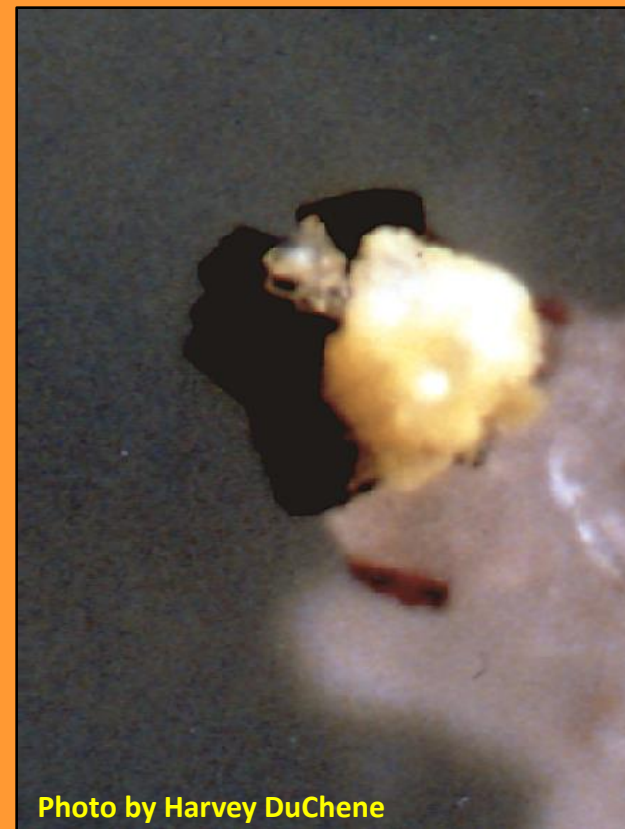

Photo by Harvey DuChene

**Tyuyamunite (yellow) on  
fluorite (dark purple) and  
quartz. Yellow mass is ~ 1mm  
across.**

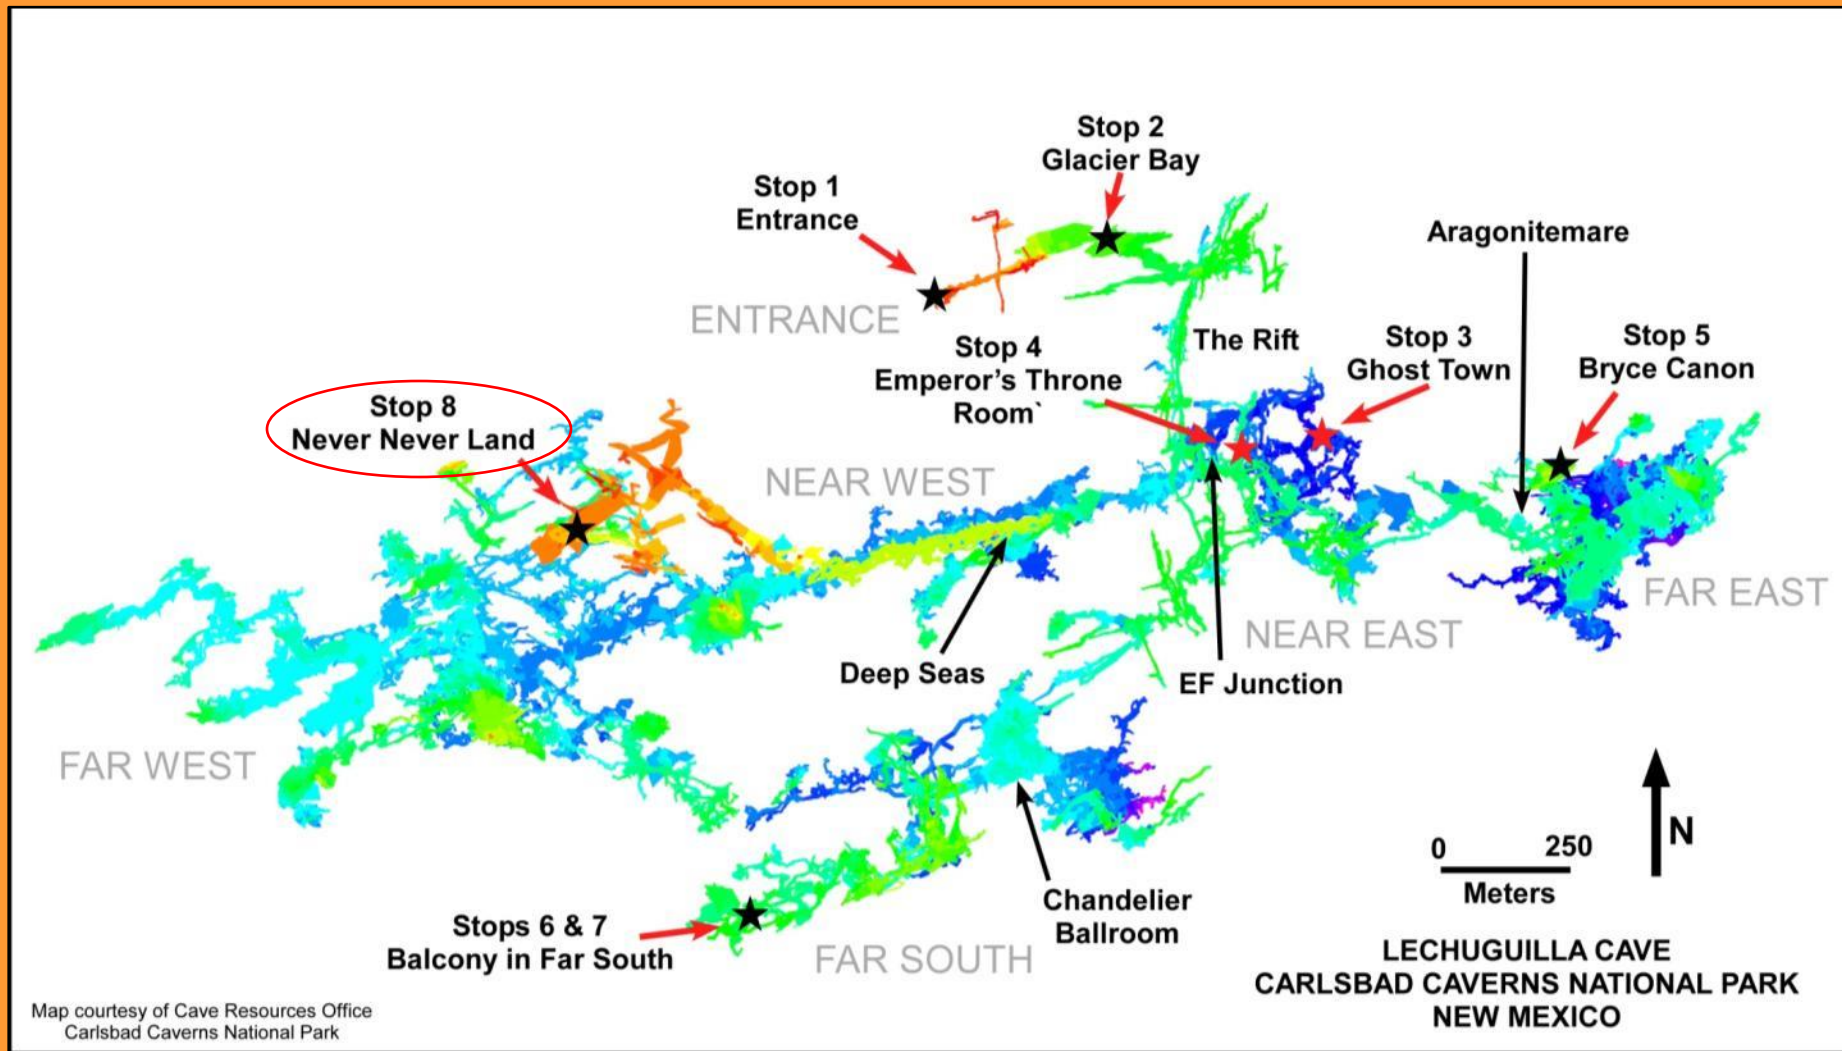

## Stop 4.8: Never Never Land Trays

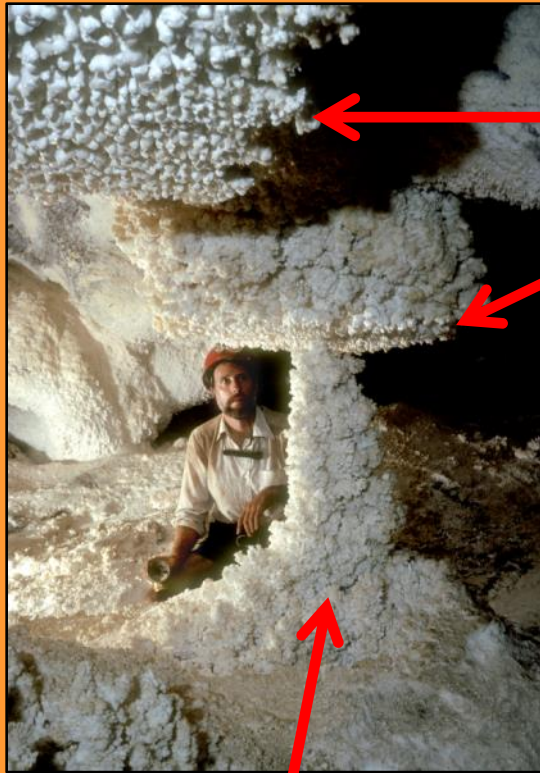

**Trays**

**Coralloid  
“stalagmites”**

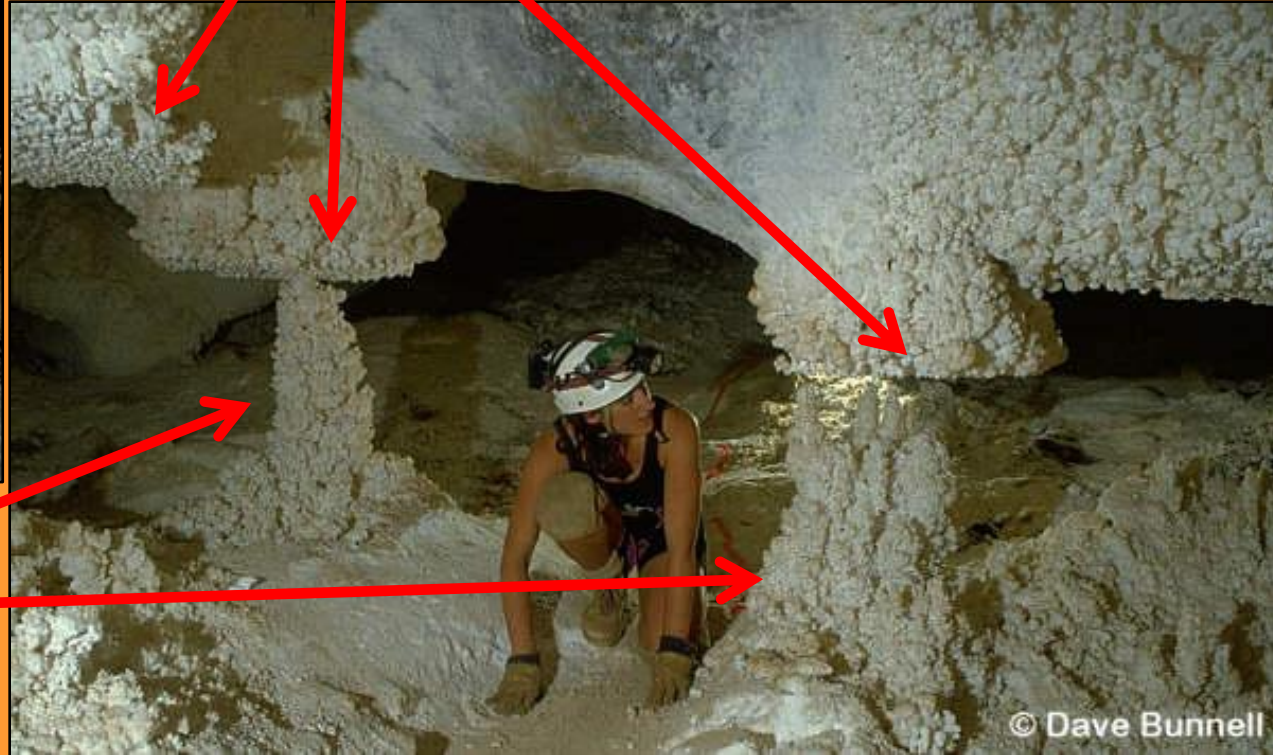

**Trays and coralloid “stalagmites”, Deep Seas area, Western Borehole**

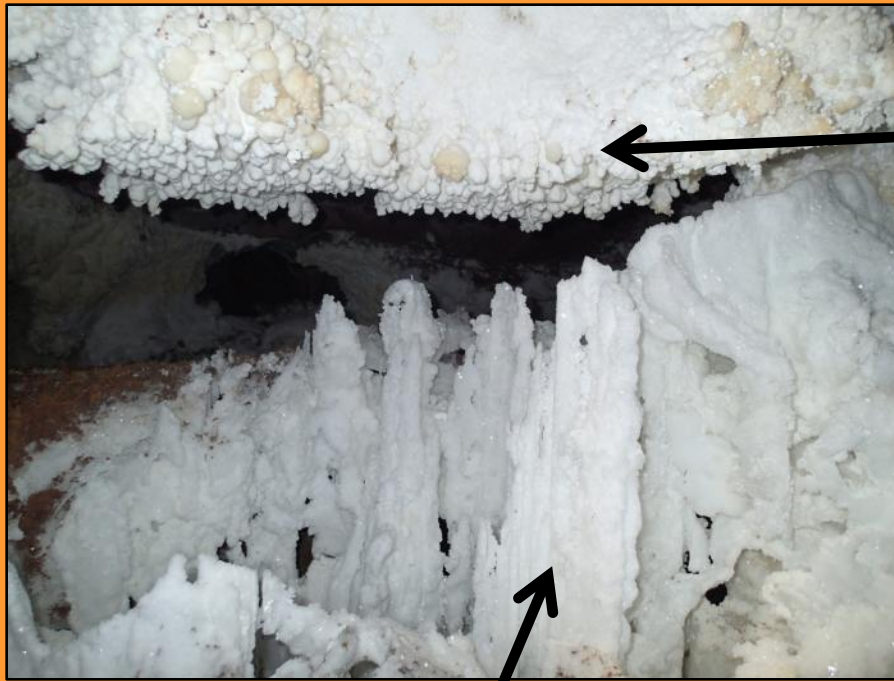

**Trays**

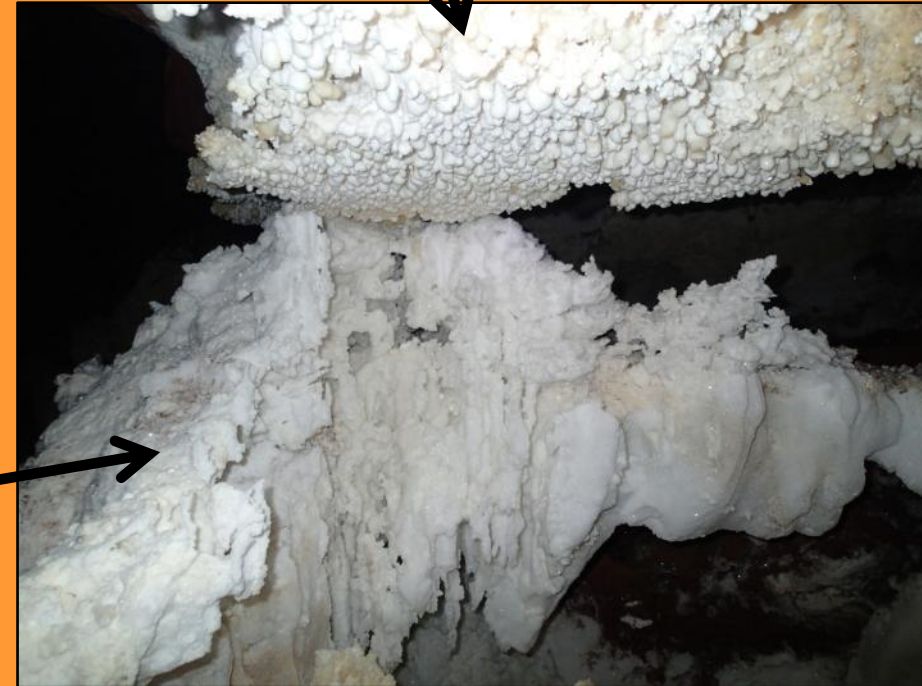

**Gypsum**

Photos by Art Fortini

**Is there a relationship between the flat bottoms of trays and underlying gypsum masses?**

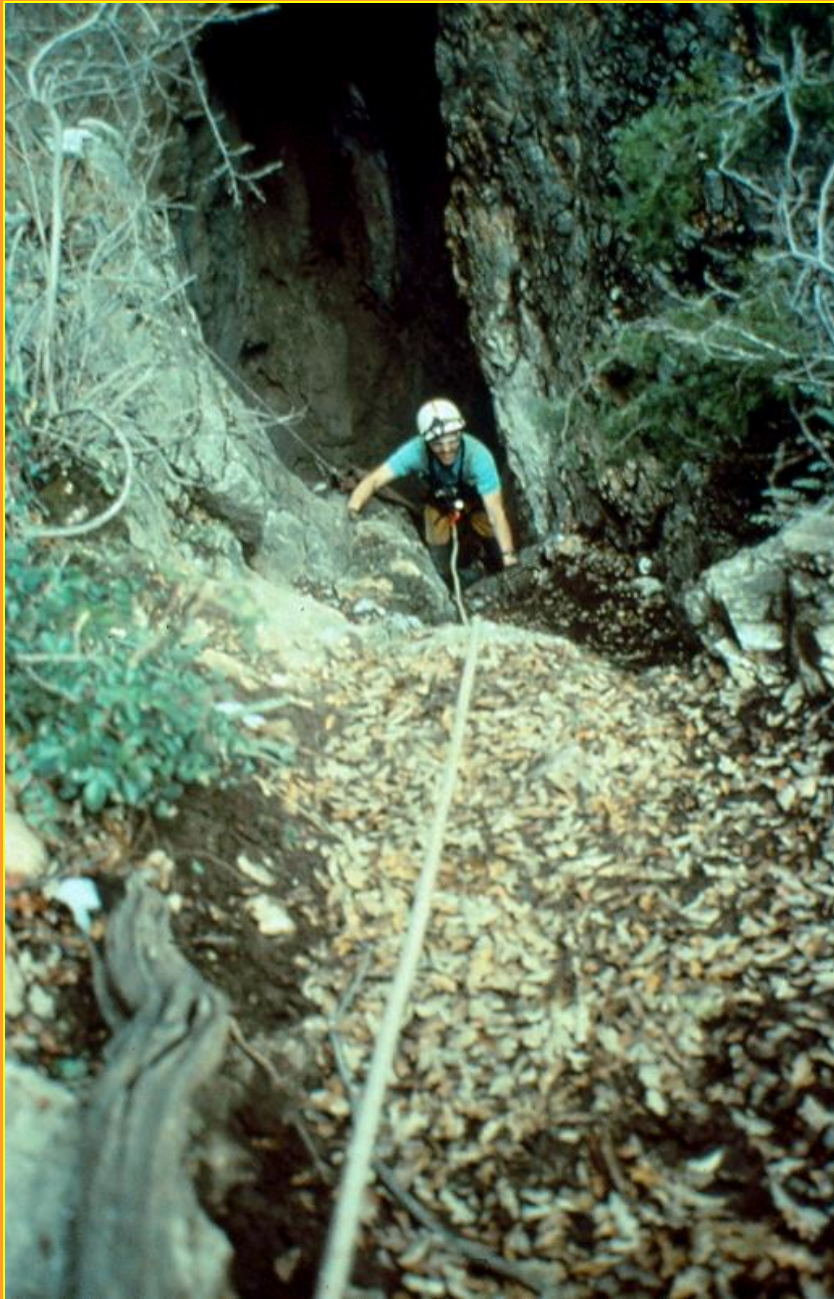

**Daylight at last!**
